# Supplementary material for: MicroRNA Isoforms Contribution to Melanoma Pathogenesis
Source: Noncoding RNA. 2021 Sep 27;7(4):63. doi: 10.3390/ncrna7040063 (PMC8544706; doi:10.3390/ncrna7040063)
Supplement: Supplementary file 1 [file ncrna-07-00063-s001.zip]

Archive with 10 entries (10 files):
- Figure S1.jpg
- Figure S2.jpg
- ncrna-1316551-Supplementary Materials.pdf
- Supplementary table 1.xlsx
- Supplementary Table 2.xlsx
- Supplementary table 3.xlsx
- supplementary table 4.xlsx
- supplementary table 5.xlsx
- Supplementary table 6.xlsx
- Supplementary table 7.xlsx
