# Supplementary material for: MicroRNA Isoforms Contribution to Melanoma Pathogenesis
Source: Noncoding RNA. 2021 Sep 27;7(4):63. doi: 10.3390/ncrna7040063 (PMC8544706; doi:10.3390/ncrna7040063)
Supplement: Supplementary file 1 [file ncrna-07-00063-s001.zip › Supplementary table 1.xlsx]

## Sheet: Sheet1
TABLE S1: List of mature microRNAs detected in the small-RNA sequencing of 23 samples (20 CM and 3 BN).
Name	Mature microRNA name	Sequence	Type	isomiR group
MIMAT0000062|hsa-let-7a-5p|0|+1	let-7a-5p|0|+1	TGAGGTAGTAGGTTGTATAGTTT	isomiR	end-site
MIMAT0000062|hsa-let-7a-5p|0|0	let-7a-5p|0|0	TGAGGTAGTAGGTTGTATAGTT	canonical miRNA
MIMAT0000062|hsa-let-7a-5p|0|-1	let-7a-5p|0|-1	TGAGGTAGTAGGTTGTATAGT	isomiR	end-site
MIMAT0000062|hsa-let-7a-5p|0|-2	let-7a-5p|0|-2	TGAGGTAGTAGGTTGTATAG	isomiR	end-site
MIMAT0000062|hsa-let-7a-5p|0|-3	let-7a-5p|0|-3	TGAGGTAGTAGGTTGTATA	isomiR	end-site
MIMAT0000062|hsa-let-7a-5p|0|-4	let-7a-5p|0|-4	TGAGGTAGTAGGTTGTAT	isomiR	end-site
MIMAT0004482|hsa-let-7b-3p|0|-1(+1U)	let-7b-3p|0|-1(+1U)	CTATACAACCTACTGCCTTCCT	isomiR (orphan)	mixed: end-site + 3’ non-templated addition
MIMAT0000063|hsa-let-7b-5p|0|+1	let-7b-5p|0|+1	TGAGGTAGTAGGTTGTGTGGTTT	isomiR	end-site
MIMAT0000063|hsa-let-7b-5p|0|+1(+1U)	let-7b-5p|0|+1(+1U)	TGAGGTAGTAGGTTGTGTGGTTTT	isomiR	mixed: end-site + 3’ non-templated addition
MIMAT0000063|hsa-let-7b-5p|0|0	let-7b-5p|0|0	TGAGGTAGTAGGTTGTGTGGTT	canonical miRNA
MIMAT0000063|hsa-let-7b-5p|0|-1	let-7b-5p|0|-1	TGAGGTAGTAGGTTGTGTGGT	isomiR	end-site
MIMAT0000063|hsa-let-7b-5p|0|-2	let-7b-5p|0|-2	TGAGGTAGTAGGTTGTGTGG	isomiR	end-site
MIMAT0000064|hsa-let-7c-5p|0|+1	let-7c-5p|0|+1	TGAGGTAGTAGGTTGTATGGTTT	isomiR	end-site
MIMAT0000064|hsa-let-7c-5p|0|0	let-7c-5p|0|0	TGAGGTAGTAGGTTGTATGGTT	canonical miRNA
MIMAT0000064|hsa-let-7c-5p|0|-1	let-7c-5p|0|-1	TGAGGTAGTAGGTTGTATGGT	isomiR	end-site
MIMAT0004484|hsa-let-7d-3p|0|0	let-7d-3p|0|0	CTATACGACCTGCTGCCTTTCT	canonical miRNA (without isomiRs)
MIMAT0000065|hsa-let-7d-5p|0|0	let-7d-5p|0|0	AGAGGTAGTAGGTTGCATAGTT	canonical miRNA
MIMAT0000065|hsa-let-7d-5p|0|-1	let-7d-5p|0|-1	AGAGGTAGTAGGTTGCATAGT	isomiR	end-site
MIMAT0000066|hsa-let-7e-5p|0|0	let-7e-5p|0|0	TGAGGTAGGAGGTTGTATAGTT	canonical miRNA
MIMAT0000066|hsa-let-7e-5p|0|-1	let-7e-5p|0|-1	TGAGGTAGGAGGTTGTATAGT	isomiR	end-site
MIMAT0000067_1|hsa-let-7f-5p|0|+1	let-7f-5p|0|+1	TGAGGTAGTAGATTGTATAGTTT	isomiR	3' non-templated addition
MIMAT0000067|hsa-let-7f-5p|0|+1	let-7f-5p|0|+1	TGAGGTAGTAGATTGTATAGTTG	isomiR	end-site
MIMAT0000067|hsa-let-7f-5p|0|0	let-7f-5p|0|0	TGAGGTAGTAGATTGTATAGTT	canonical miRNA
MIMAT0000067|hsa-let-7f-5p|0|-1	let-7f-5p|0|-1	TGAGGTAGTAGATTGTATAGT	isomiR	end-site
MIMAT0000067|hsa-let-7f-5p|0|-2	let-7f-5p|0|-2	TGAGGTAGTAGATTGTATAG	isomiR	end-site
MIMAT0000414|hsa-let-7g-5p|0|+1	let-7g-5p|0|+1	TGAGGTAGTAGTTTGTACAGTTT	isomiR	end-site
MIMAT0000414|hsa-let-7g-5p|0|0	let-7g-5p|0|0	TGAGGTAGTAGTTTGTACAGTT	canonical miRNA
MIMAT0000414|hsa-let-7g-5p|0|-1	let-7g-5p|0|-1	TGAGGTAGTAGTTTGTACAGT	isomiR	end-site
MIMAT0000415|hsa-let-7i-5p|0|0	let-7i-5p|0|0	TGAGGTAGTAGTTTGTGCTGTT	canonical miRNA
MIMAT0000415|hsa-let-7i-5p|0|0(+1U)	let-7i-5p|0|0(+1U)	TGAGGTAGTAGTTTGTGCTGTTT	isomiR	3' non-templated addition
MIMAT0000415|hsa-let-7i-5p|0|-1	let-7i-5p|0|-1	TGAGGTAGTAGTTTGTGCTGT	isomiR	end-site
MIMAT0000415|hsa-let-7i-5p|0|-2	let-7i-5p|0|-2	TGAGGTAGTAGTTTGTGCTG	isomiR	end-site
MIMAT0000415|hsa-let-7i-5p|0|-4	let-7i-5p|0|-4	TGAGGTAGTAGTTTGTGC	isomiR	end-site
MIMAT0000098|hsa-miR-100-5p|0|+1	miR-100-5p|0|+1	AACCCGTAGATCCGAACTTGTGG	isomiR	end-site
MIMAT0000098|hsa-miR-100-5p|0|0	miR-100-5p|0|0	AACCCGTAGATCCGAACTTGTG	canonical miRNA
MIMAT0000098|hsa-miR-100-5p|0|0(+1U)	miR-100-5p|0|0(+1U)	AACCCGTAGATCCGAACTTGTGT	isomiR	3' non-templated addition
MIMAT0000098|hsa-miR-100-5p|0|-1	miR-100-5p|0|-1	AACCCGTAGATCCGAACTTGT	isomiR	end-site
MIMAT0000098|hsa-miR-100-5p|0|-2	miR-100-5p|0|-2	AACCCGTAGATCCGAACTTG	isomiR	end-site
MIMAT0000099|hsa-miR-101-3p|0|+1	miR-101-3p|0|+1	TACAGTACTGTGATAACTGAAG	isomiR	end-site
MIMAT0000099|hsa-miR-101-3p|0|+1(+1U)	miR-101-3p|0|+1(+1U)	TACAGTACTGTGATAACTGAAGT	isomiR	mixed: end-site + 3’ non-templated addition
MIMAT0000099_1|hsa-miR-101-3p|0|+2	miR-101-3p|0|+2	TACAGTACTGTGATAACTGAAGA	isomiR	mixed: end-site + 3’ non-templated addition
MIMAT0000099|hsa-miR-101-3p|0|0	miR-101-3p|0|0	TACAGTACTGTGATAACTGAA	canonical miRNA
MIMAT0000099|hsa-miR-101-3p|0|0(+1U)	miR-101-3p|0|0(+1U)	TACAGTACTGTGATAACTGAAT	isomiR	3' non-templated addition
MIMAT0000099|hsa-miR-101-3p|0|-1	miR-101-3p|0|-1	TACAGTACTGTGATAACTGA	isomiR	end-site
MIMAT0000099|hsa-miR-101-3p|0|-2	miR-101-3p|0|-2	TACAGTACTGTGATAACTG	isomiR	end-site
MIMAT0000099|hsa-miR-101-3p|-1|0	miR-101-3p|-1|0	GTACAGTACTGTGATAACTGAA	isomiR	start-site
MIMAT0000099|hsa-miR-101-3p|-1|-1	miR-101-3p|-1|-1	GTACAGTACTGTGATAACTGA	isomiR	shifted
MIMAT0000099|hsa-miR-101-3p|-1|-2	miR-101-3p|-1|-2	GTACAGTACTGTGATAACTG	isomiR	mixed: start-site + end-site
MIMAT0000099|hsa-miR-101-3p|-1|-3	miR-101-3p|-1|-3	GTACAGTACTGTGATAACT	isomiR	mixed: start-site + end-site
MIMAT0000101|hsa-miR-103a-3p|+3|0	miR-103a-3p|+3|0	AGCATTGTACAGGGCTATGA	isomiR	start-site
MIMAT0000101|hsa-miR-103a-3p|0|0	miR-103a-3p|0|0	AGCAGCATTGTACAGGGCTATGA	canonical miRNA
MIMAT0000101|hsa-miR-103a-3p|0|0(+1U)	miR-103a-3p|0|0(+1U)	AGCAGCATTGTACAGGGCTATGAT	isomiR	3' non-templated addition
MIMAT0000101|hsa-miR-103a-3p|0|-1	miR-103a-3p|0|-1	AGCAGCATTGTACAGGGCTATG	isomiR	end-site
MIMAT0000101|hsa-miR-103a-3p|0|-1(+1U)	miR-103a-3p|0|-1(+1U)	AGCAGCATTGTACAGGGCTATGT	isomiR	mixed: end-site + 3’ non-templated addition
MIMAT0000101|hsa-miR-103a-3p|0|-1(+2U)	miR-103a-3p|0|-1(+2U)	AGCAGCATTGTACAGGGCTATGTT	isomiR	mixed: end-site + 3’ non-templated addition
MIMAT0004672|hsa-miR-106b-3p|-2|-2	miR-106b-3p|-2|-2	TACCGCACTGTGGGTACTTGCT	isomiR (orphan)	shifted
MIMAT0000104|hsa-miR-107|0|-2	miR-107|0|-2	AGCAGCATTGTACAGGGCTAT	isomiR (orphan)	end-site
MIMAT0000104|hsa-miR-107|0|-4	miR-107|0|-4	AGCAGCATTGTACAGGGCT	isomiR (orphan)	end-site
MIMAT0000253|hsa-miR-10a-5p|+1|+1	miR-10a-5p|+1|+1	ACCCTGTAGATCCGAATTTGTGT	isomiR	shifted
MIMAT0000253|hsa-miR-10a-5p|+1|0	miR-10a-5p|+1|0	ACCCTGTAGATCCGAATTTGTG	isomiR	start-site
MIMAT0000253|hsa-miR-10a-5p|+1|-1	miR-10a-5p|+1|-1	ACCCTGTAGATCCGAATTTGT	isomiR	mixed: start-site + end-site
MIMAT0000253|hsa-miR-10a-5p|+1|-2	miR-10a-5p|+1|-2	ACCCTGTAGATCCGAATTTG	isomiR	mixed: start-site + end-site
MIMAT0000253|hsa-miR-10a-5p|0|+1	miR-10a-5p|0|+1	TACCCTGTAGATCCGAATTTGTGT	isomiR	end-site
MIMAT0000253|hsa-miR-10a-5p|0|0	miR-10a-5p|0|0	TACCCTGTAGATCCGAATTTGTG	canonical miRNA
MIMAT0000253|hsa-miR-10a-5p|0|-1	miR-10a-5p|0|-1	TACCCTGTAGATCCGAATTTGT	isomiR	end-site
MIMAT0000253|hsa-miR-10a-5p|0|-2	miR-10a-5p|0|-2	TACCCTGTAGATCCGAATTTG	isomiR	end-site
MIMAT0000253|hsa-miR-10a-5p|0|-3	miR-10a-5p|0|-3	TACCCTGTAGATCCGAATTT	isomiR	end-site
MIMAT0000254|hsa-miR-10b-5p|+1|+1	miR-10b-5p|+1|+1	ACCCTGTAGAACCGAATTTGTGT	isomiR	shifted
MIMAT0000254|hsa-miR-10b-5p|+1|0	miR-10b-5p|+1|0	ACCCTGTAGAACCGAATTTGTG	isomiR	start-site
MIMAT0000254|hsa-miR-10b-5p|+1|-1	miR-10b-5p|+1|-1	ACCCTGTAGAACCGAATTTGT	isomiR	mixed: start-site + end-site
MIMAT0000254|hsa-miR-10b-5p|+1|-2	miR-10b-5p|+1|-2	ACCCTGTAGAACCGAATTTG	isomiR	mixed: start-site + end-site
MIMAT0000254|hsa-miR-10b-5p|0|+1	miR-10b-5p|0|+1	TACCCTGTAGAACCGAATTTGTGT	isomiR	end-site
MIMAT0000254|hsa-miR-10b-5p|0|0	miR-10b-5p|0|0	TACCCTGTAGAACCGAATTTGTG	canonical miRNA
MIMAT0000254|hsa-miR-10b-5p|0|-1	miR-10b-5p|0|-1	TACCCTGTAGAACCGAATTTGT	isomiR	end-site
MIMAT0000254|hsa-miR-10b-5p|0|-1(+1U)	miR-10b-5p|0|-1(+1U)	TACCCTGTAGAACCGAATTTGTT	isomiR	3' non-templated addition
MIMAT0000254|hsa-miR-10b-5p|0|-2	miR-10b-5p|0|-2	TACCCTGTAGAACCGAATTTG	isomiR	end-site
MIMAT0000254|hsa-miR-10b-5p|0|-3	miR-10b-5p|0|-3	TACCCTGTAGAACCGAATTT	isomiR	end-site
MIMAT0000254|hsa-miR-10b-5p|0|-4	miR-10b-5p|0|-4	TACCCTGTAGAACCGAATT	isomiR	end-site
MIMAT0005899|hsa-miR-1247-5p|0|0(+1U)	miR-1247-5p|0|0(+1U)	ACCCGTCCCGTTCGTCCCCGGAT	isomiR (orphan)	3' non-templated addition
MIMAT0000443|hsa-miR-125a-5p|0|0	miR-125a-5p|0|0	TCCCTGAGACCCTTTAACCTGTGA	canonical miRNA
MIMAT0000443|hsa-miR-125a-5p|0|-1	miR-125a-5p|0|-1	TCCCTGAGACCCTTTAACCTGTG	isomiR	end-site
MIMAT0000443|hsa-miR-125a-5p|0|-1(+1U)	miR-125a-5p|0|-1(+1U)	TCCCTGAGACCCTTTAACCTGTGT	isomiR	mixed: end-site + 3’ non-templated addition
MIMAT0000443|hsa-miR-125a-5p|0|-2	miR-125a-5p|0|-2	TCCCTGAGACCCTTTAACCTGT	isomiR	end-site
MIMAT0000443|hsa-miR-125a-5p|0|-2(+1U)	miR-125a-5p|0|-2(+1U)	TCCCTGAGACCCTTTAACCTGTT	isomiR	mixed: end-site + 3’ non-templated addition
MIMAT0000443|hsa-miR-125a-5p|0|-3	miR-125a-5p|0|-3	TCCCTGAGACCCTTTAACCTG	isomiR	end-site
MIMAT0000443|hsa-miR-125a-5p|0|-4	miR-125a-5p|0|-4	TCCCTGAGACCCTTTAACCT	isomiR	end-site
MIMAT0004603|hsa-miR-125b-2-3p|+2|+2	miR-125b-2-3p|+2|+2	ACAAGTCAGGCTCTTGGGACCT	isomiR (orphan)	shifted
MIMAT0004603|hsa-miR-125b-2-3p|+2|0(+1U)	miR-125b-2-3p|+2|0(+1U)	ACAAGTCAGGCTCTTGGGACT	isomiR (orphan)	mixed: start-site + 3’ non-templated addition
MIMAT0000423|hsa-miR-125b-5p|0|+1	miR-125b-5p|0|+1	TCCCTGAGACCCTAACTTGTGAT	isomiR	end-site
MIMAT0000423|hsa-miR-125b-5p|0|0	miR-125b-5p|0|0	TCCCTGAGACCCTAACTTGTGA	canonical miRNA
MIMAT0000423|hsa-miR-125b-5p|0|-1	miR-125b-5p|0|-1	TCCCTGAGACCCTAACTTGTG	isomiR	end-site
MIMAT0000423|hsa-miR-125b-5p|0|-1(+1U)	miR-125b-5p|0|-1(+1U)	TCCCTGAGACCCTAACTTGTGT	isomiR	mixed: end-site + 3’ non-templated addition
MIMAT0000423|hsa-miR-125b-5p|0|-2	miR-125b-5p|0|-2	TCCCTGAGACCCTAACTTGT	isomiR	end-site
MIMAT0000423|hsa-miR-125b-5p|0|-3	miR-125b-5p|0|-3	TCCCTGAGACCCTAACTTG	isomiR	end-site
MIMAT0000445|hsa-miR-126-3p|+1|0	miR-126-3p|+1|0	CGTACCGTGAGTAATAATGCG	isomiR	start-site
MIMAT0000445|hsa-miR-126-3p|+1|0(+1U)	miR-126-3p|+1|0(+1U)	CGTACCGTGAGTAATAATGCGT	isomiR	mixed: start-site + 3’ non-templated addition
MIMAT0000445|hsa-miR-126-3p|0|0	miR-126-3p|0|0	TCGTACCGTGAGTAATAATGCG	canonical miRNA
MIMAT0000445|hsa-miR-126-3p|0|-1	miR-126-3p|0|-1	TCGTACCGTGAGTAATAATGC	isomiR	end-site
MIMAT0000445|hsa-miR-126-3p|0|-2	miR-126-3p|0|-2	TCGTACCGTGAGTAATAATG	isomiR	end-site
MIMAT0000444|hsa-miR-126-5p|0|0	miR-126-5p|0|0	CATTATTACTTTTGGTACGCG	canonical miRNA
MIMAT0000444|hsa-miR-126-5p|0|0(+1U)	miR-126-5p|0|0(+1U)	CATTATTACTTTTGGTACGCGT	isomiR	3' non-templated addition
MIMAT0000444|hsa-miR-126-5p|0|-2	miR-126-5p|0|-2	CATTATTACTTTTGGTACG	isomiR	end-site
MIMAT0000424|hsa-miR-128-3p|0|0	miR-128-3p|0|0	TCACAGTGAACCGGTCTCTTT	canonical miRNA (without isomiRs)
MIMAT0022727|hsa-miR-1307-5p|0|0	miR-1307-5p|0|0	TCGACCGGACCTCGACCGGCT	canonical miRNA (without isomiRs)
MIMAT0000425|hsa-miR-130a-3p|0|+1	miR-130a-3p|0|+1	CAGTGCAATGTTAAAAGGGCATT	isomiR	end-site
MIMAT0000425|hsa-miR-130a-3p|0|0	miR-130a-3p|0|0	CAGTGCAATGTTAAAAGGGCAT	canonical miRNA
MIMAT0000425|hsa-miR-130a-3p|0|-1	miR-130a-3p|0|-1	CAGTGCAATGTTAAAAGGGCA	isomiR	end-site
MIMAT0000425|hsa-miR-130a-3p|0|-2	miR-130a-3p|0|-2	CAGTGCAATGTTAAAAGGGC	isomiR	end-site
MIMAT0004606|hsa-miR-136-3p|0|0	miR-136-3p|0|0	CATCATCGTCTCAAATGAGTCT	canonical miRNA (without isomiRs)
MIMAT0000430|hsa-miR-138-5p|0|0	miR-138-5p|0|0	AGCTGGTGTTGTGAATCAGGCCG	canonical miRNA (without isomiRs)
MIMAT0004597|hsa-miR-140-3p|+1|+2	miR-140-3p|+1|+2	ACCACAGGGTAGAACCACGGAC	isomiR (orphan)	mixed: start-site + end-site
MIMAT0004597|hsa-miR-140-3p|0|+1	miR-140-3p|0|+1	TACCACAGGGTAGAACCACGGA	isomiR (orphan)	end-site
MIMAT0004597|hsa-miR-140-3p|0|+2	miR-140-3p|0|+2	TACCACAGGGTAGAACCACGGAC	isomiR (orphan)	end-site
MIMAT0000432|hsa-miR-141-3p|0|+1	miR-141-3p|0|+1	TAACACTGTCTGGTAAAGATGGC	isomiR	end-site
MIMAT0000432|hsa-miR-141-3p|0|+2	miR-141-3p|0|+2	TAACACTGTCTGGTAAAGATGGCT	isomiR	end-site
MIMAT0000432|hsa-miR-141-3p|0|0	miR-141-3p|0|0	TAACACTGTCTGGTAAAGATGG	canonical miRNA
MIMAT0000432|hsa-miR-141-3p|0|-1	miR-141-3p|0|-1	TAACACTGTCTGGTAAAGATG	isomiR	end-site
MIMAT0000434|hsa-miR-142-3p|0|0	miR-142-3p|0|0	TGTAGTGTTTCCTACTTTATGGA	canonical miRNA (without isomiRs)
MIMAT0000433|hsa-miR-142-5p|0|+1	miR-142-5p|0|+1	CATAAAGTAGAAAGCACTACTA	isomiR	end-site
MIMAT0000433|hsa-miR-142-5p|0|0	miR-142-5p|0|0	CATAAAGTAGAAAGCACTACT	canonical miRNA
MIMAT0000433|hsa-miR-142-5p|0|-1	miR-142-5p|0|-1	CATAAAGTAGAAAGCACTAC	isomiR	end-site
MIMAT0000433|hsa-miR-142-5p|0|-3	miR-142-5p|0|-3	CATAAAGTAGAAAGCACT	isomiR	end-site
MIMAT0000433|hsa-miR-142-5p|-2|-1	miR-142-5p|-2|-1	CCCATAAAGTAGAAAGCACTAC	isomiR	mixed: start-site + end-site
MIMAT0000433|hsa-miR-142-5p|-2|-2	miR-142-5p|-2|-2	CCCATAAAGTAGAAAGCACTA	isomiR	shifted
MIMAT0000433|hsa-miR-142-5p|-2|-3	miR-142-5p|-2|-3	CCCATAAAGTAGAAAGCACT	isomiR	mixed: start-site + end-site
MIMAT0000435|hsa-miR-143-3p|0|+1	miR-143-3p|0|+1	TGAGATGAAGCACTGTAGCTCA	isomiR	end-site
MIMAT0000435|hsa-miR-143-3p|0|+1(+1U)	miR-143-3p|0|+1(+1U)	TGAGATGAAGCACTGTAGCTCAT	isomiR	mixed: end-site + 3’ non-templated addition
MIMAT0000435|hsa-miR-143-3p|0|0	miR-143-3p|0|0	TGAGATGAAGCACTGTAGCTC	canonical miRNA
MIMAT0000435|hsa-miR-143-3p|0|0(+1U)	miR-143-3p|0|0(+1U)	TGAGATGAAGCACTGTAGCTCT	isomiR	3' non-templated addition
MIMAT0000435|hsa-miR-143-3p|0|0(+2U)	miR-143-3p|0|0(+2U)	TGAGATGAAGCACTGTAGCTCTT	isomiR	3' non-templated addition
MIMAT0000435|hsa-miR-143-3p|0|-1	miR-143-3p|0|-1	TGAGATGAAGCACTGTAGCT	isomiR	end-site
MIMAT0000435|hsa-miR-143-3p|0|-1(+1U)	miR-143-3p|0|-1(+1U)	TGAGATGAAGCACTGTAGCTT	isomiR	mixed: end-site + 3’ non-templated addition
MIMAT0000435|hsa-miR-143-3p|0|-1(+2U)	miR-143-3p|0|-1(+2U)	TGAGATGAAGCACTGTAGCTTT	isomiR	mixed: end-site + 3’ non-templated addition
MIMAT0000435|hsa-miR-143-3p|0|-1(+3U)	miR-143-3p|0|-1(+3U)	TGAGATGAAGCACTGTAGCTTTT	isomiR	mixed: end-site + 3’ non-templated addition
MIMAT0000435|hsa-miR-143-3p|0|-2	miR-143-3p|0|-2	TGAGATGAAGCACTGTAGC	isomiR	end-site
MIMAT0000435|hsa-miR-143-3p|0|-3	miR-143-3p|0|-3	TGAGATGAAGCACTGTAG	isomiR	end-site
MIMAT0000435|hsa-miR-143-3p|-1|0	miR-143-3p|-1|0	CTGAGATGAAGCACTGTAGCTC	isomiR	start-site
MIMAT0000435|hsa-miR-143-3p|-1|0(+1U)	miR-143-3p|-1|0(+1U)	CTGAGATGAAGCACTGTAGCTCT	isomiR	mixed: start-site + 3’ non-templated addition
MIMAT0000435|hsa-miR-143-3p|-1|-1	miR-143-3p|-1|-1	CTGAGATGAAGCACTGTAGCT	isomiR	shifted
MIMAT0004601|hsa-miR-145-3p|+2|+1	miR-145-3p|+2|+1	ATTCCTGGAAATACTGTTCTT	isomiR (orphan)	mixed: start-site + end-site
MIMAT0000437|hsa-miR-145-5p|0|0	miR-145-5p|0|0	GTCCAGTTTTCCCAGGAATCCCT	canonical miRNA
MIMAT0000437|hsa-miR-145-5p|0|-1	miR-145-5p|0|-1	GTCCAGTTTTCCCAGGAATCCC	isomiR	end-site
MIMAT0000449|hsa-miR-146a-5p|0|+1	miR-146a-5p|0|+1	TGAGAACTGAATTCCATGGGTTG	isomiR	end-site
MIMAT0000449|hsa-miR-146a-5p|0|+2	miR-146a-5p|0|+2	TGAGAACTGAATTCCATGGGTTGT	isomiR	end-site
MIMAT0000449|hsa-miR-146a-5p|0|0	miR-146a-5p|0|0	TGAGAACTGAATTCCATGGGTT	canonical miRNA
MIMAT0000449|hsa-miR-146a-5p|0|0(+1U)	miR-146a-5p|0|0(+1U)	TGAGAACTGAATTCCATGGGTTT	isomiR	3' non-templated addition
MIMAT0000449|hsa-miR-146a-5p|0|-1	miR-146a-5p|0|-1	TGAGAACTGAATTCCATGGGT	isomiR	end-site
MIMAT0002809|hsa-miR-146b-5p|0|+1	miR-146b-5p|0|+1	TGAGAACTGAATTCCATAGGCTGT	isomiR	end-site
MIMAT0002809|hsa-miR-146b-5p|0|0	miR-146b-5p|0|0	TGAGAACTGAATTCCATAGGCTG	canonical miRNA
MIMAT0000243|hsa-miR-148a-3p|0|+1	miR-148a-3p|0|+1	TCAGTGCACTACAGAACTTTGTC	isomiR	end-site
MIMAT0000243|hsa-miR-148a-3p|0|+2	miR-148a-3p|0|+2	TCAGTGCACTACAGAACTTTGTCT	isomiR	end-site
MIMAT0000243|hsa-miR-148a-3p|0|0	miR-148a-3p|0|0	TCAGTGCACTACAGAACTTTGT	canonical miRNA
MIMAT0000243|hsa-miR-148a-3p|0|0(+1U)	miR-148a-3p|0|0(+1U)	TCAGTGCACTACAGAACTTTGTT	isomiR	3' non-templated addition
MIMAT0000243|hsa-miR-148a-3p|0|0(+2U)	miR-148a-3p|0|0(+2U)	TCAGTGCACTACAGAACTTTGTTT	isomiR	3' non-templated addition
MIMAT0000243|hsa-miR-148a-3p|0|-1	miR-148a-3p|0|-1	TCAGTGCACTACAGAACTTTG	isomiR	end-site
MIMAT0004549|hsa-miR-148a-5p|0|0	miR-148a-5p|0|0	AAAGTTCTGAGACACTCCGACT	canonical miRNA (without isomiRs)
MIMAT0000759|hsa-miR-148b-3p|0|0	miR-148b-3p|0|0	TCAGTGCATCACAGAACTTTGT	canonical miRNA
MIMAT0000759|hsa-miR-148b-3p|0|0(+1U)	miR-148b-3p|0|0(+1U)	TCAGTGCATCACAGAACTTTGTT	isomiR	3' non-templated addition
MIMAT0000759|hsa-miR-148b-3p|0|0(+2U)	miR-148b-3p|0|0(+2U)	TCAGTGCATCACAGAACTTTGTTT	isomiR	3' non-templated addition
MIMAT0000450|hsa-miR-149-5p|0|0	miR-149-5p|0|0	TCTGGCTCCGTGTCTTCACTCCC	canonical miRNA
MIMAT0000450|hsa-miR-149-5p|0|0(+1U)	miR-149-5p|0|0(+1U)	TCTGGCTCCGTGTCTTCACTCCCT	isomiR	3' non-templated addition
MIMAT0000450|hsa-miR-149-5p|0|-1	miR-149-5p|0|-1	TCTGGCTCCGTGTCTTCACTCC	isomiR	end-site
MIMAT0000450|hsa-miR-149-5p|0|-2	miR-149-5p|0|-2	TCTGGCTCCGTGTCTTCACTC	isomiR	end-site
MIMAT0000450|hsa-miR-149-5p|0|-3	miR-149-5p|0|-3	TCTGGCTCCGTGTCTTCACT	isomiR	end-site
MIMAT0000451|hsa-miR-150-5p|0|0	miR-150-5p|0|0	TCTCCCAACCCTTGTACCAGTG	canonical miRNA
MIMAT0000451|hsa-miR-150-5p|0|0(+1U)	miR-150-5p|0|0(+1U)	TCTCCCAACCCTTGTACCAGTGT	isomiR	3' non-templated addition
MIMAT0000451|hsa-miR-150-5p|0|-1	miR-150-5p|0|-1	TCTCCCAACCCTTGTACCAGT	isomiR	end-site
MIMAT0000451|hsa-miR-150-5p|0|-2	miR-150-5p|0|-2	TCTCCCAACCCTTGTACCAG	isomiR	end-site
MIMAT0000757|hsa-miR-151a-3p|0|+1	miR-151a-3p|0|+1	CTAGACTGAAGCTCCTTGAGGA	isomiR (orphan)	end-site
MIMAT0000757|hsa-miR-151a-3p|0|+1(+1U)	miR-151a-3p|0|+1(+1U)	CTAGACTGAAGCTCCTTGAGGAT	isomiR (orphan)	mixed: end-site + 3’ non-templated addition
MIMAT0000757|hsa-miR-151a-3p|-2|0	miR-151a-3p|-2|0	TACTAGACTGAAGCTCCTTGAGG	isomiR (orphan)	start-site
MIMAT0000757|hsa-miR-151a-3p|-2|-1	miR-151a-3p|-2|-1	TACTAGACTGAAGCTCCTTGAG	isomiR (orphan)	mixed: start-site + end-site
MIMAT0000646|hsa-miR-155-5p|0|0	miR-155-5p|0|0	TTAATGCTAATCGTGATAGGGGTT	canonical miRNA
MIMAT0000646|hsa-miR-155-5p|0|-1	miR-155-5p|0|-1	TTAATGCTAATCGTGATAGGGGT	isomiR	end-site
MIMAT0000068|hsa-miR-15a-5p|0|0	miR-15a-5p|0|0	TAGCAGCACATAATGGTTTGTG	canonical miRNA
MIMAT0000068|hsa-miR-15a-5p|0|-1	miR-15a-5p|0|-1	TAGCAGCACATAATGGTTTGT	isomiR	end-site
MIMAT0000069|hsa-miR-16-5p|0|+1	miR-16-5p|0|+1	TAGCAGCACGTAAATATTGGCGT	isomiR	end-site
MIMAT0000069|hsa-miR-16-5p|0|0	miR-16-5p|0|0	TAGCAGCACGTAAATATTGGCG	canonical miRNA
MIMAT0000069|hsa-miR-16-5p|0|-1	miR-16-5p|0|-1	TAGCAGCACGTAAATATTGGC	isomiR	end-site
MIMAT0000070|hsa-miR-17-5p|0|0	miR-17-5p|0|0	CAAAGTGCTTACAGTGCAGGTAG	canonical miRNA (without isomiRs)
MIMAT0004558|hsa-miR-181a-2-3p|0|0	miR-181a-2-3p|0|0	ACCACTGACCGTTGACTGTACC	canonical miRNA
MIMAT0004558|hsa-miR-181a-2-3p|0|-1	miR-181a-2-3p|0|-1	ACCACTGACCGTTGACTGTAC	isomiR	end-site
MIMAT0000270|hsa-miR-181a-3p|0|0	miR-181a-3p|0|0	ACCATCGACCGTTGATTGTACC	canonical miRNA (without isomiRs)
MIMAT0000256|hsa-miR-181a-5p|0|+1	miR-181a-5p|0|+1	AACATTCAACGCTGTCGGTGAGTT	isomiR	end-site
MIMAT0000256|hsa-miR-181a-5p|0|+2	miR-181a-5p|0|+2	AACATTCAACGCTGTCGGTGAGTTT	isomiR	end-site
MIMAT0000256|hsa-miR-181a-5p|0|0	miR-181a-5p|0|0	AACATTCAACGCTGTCGGTGAGT	canonical miRNA
MIMAT0000256|hsa-miR-181a-5p|0|-1	miR-181a-5p|0|-1	AACATTCAACGCTGTCGGTGAG	isomiR	end-site
MIMAT0000256|hsa-miR-181a-5p|0|-2	miR-181a-5p|0|-2	AACATTCAACGCTGTCGGTGA	isomiR	end-site
MIMAT0000256|hsa-miR-181a-5p|0|-2(+1U)	miR-181a-5p|0|-2(+1U)	AACATTCAACGCTGTCGGTGAT	isomiR	mixed: end-site + 3’ non-templated addition
MIMAT0000256|hsa-miR-181a-5p|0|-3	miR-181a-5p|0|-3	AACATTCAACGCTGTCGGTG	isomiR	end-site
MIMAT0000256|hsa-miR-181a-5p|0|-3(+1U)	miR-181a-5p|0|-3(+1U)	AACATTCAACGCTGTCGGTGT	isomiR	mixed: end-site + 3’ non-templated addition
MIMAT0000256|hsa-miR-181a-5p|0|-4	miR-181a-5p|0|-4	AACATTCAACGCTGTCGGT	isomiR	end-site
MIMAT0000257|hsa-miR-181b-5p|0|+1	miR-181b-5p|0|+1	AACATTCATTGCTGTCGGTGGGTT	isomiR	end-site
MIMAT0000257_1|hsa-miR-181b-5p|0|+2	miR-181b-5p|0|+2	AACATTCATTGCTGTCGGTGGGTTT	isomiR	mixed: end-site + 3’ non-templated addition
MIMAT0000257|hsa-miR-181b-5p|0|0	miR-181b-5p|0|0	AACATTCATTGCTGTCGGTGGGT	canonical miRNA
MIMAT0000257|hsa-miR-181b-5p|0|-1	miR-181b-5p|0|-1	AACATTCATTGCTGTCGGTGGG	isomiR	end-site
MIMAT0000258|hsa-miR-181c-5p|0|+1	miR-181c-5p|0|+1	AACATTCAACCTGTCGGTGAGTT	isomiR	end-site
MIMAT0000258|hsa-miR-181c-5p|0|0	miR-181c-5p|0|0	AACATTCAACCTGTCGGTGAGT	canonical miRNA
MIMAT0000258|hsa-miR-181c-5p|0|-1	miR-181c-5p|0|-1	AACATTCAACCTGTCGGTGAG	isomiR	end-site
MIMAT0000259|hsa-miR-182-5p|0|+1	miR-182-5p|0|+1	TTTGGCAATGGTAGAACTCACACTG	isomiR	end-site
MIMAT0000259|hsa-miR-182-5p|0|+1(+1U)	miR-182-5p|0|+1(+1U)	TTTGGCAATGGTAGAACTCACACTGT	isomiR	mixed: start-site + 3’ non-templated addition
MIMAT0000259|hsa-miR-182-5p|0|+2	miR-182-5p|0|+2	TTTGGCAATGGTAGAACTCACACTGG	isomiR	end-site
MIMAT0000259|hsa-miR-182-5p|0|0	miR-182-5p|0|0	TTTGGCAATGGTAGAACTCACACT	canonical miRNA
MIMAT0000259|hsa-miR-182-5p|0|-1	miR-182-5p|0|-1	TTTGGCAATGGTAGAACTCACAC	isomiR	end-site
MIMAT0000259|hsa-miR-182-5p|0|-2	miR-182-5p|0|-2	TTTGGCAATGGTAGAACTCACA	isomiR	end-site
MIMAT0000259|hsa-miR-182-5p|0|-3	miR-182-5p|0|-3	TTTGGCAATGGTAGAACTCAC	isomiR	end-site
MIMAT0000261|hsa-miR-183-5p|0|+1	miR-183-5p|0|+1	TATGGCACTGGTAGAATTCACTG	isomiR	end-site
MIMAT0000261|hsa-miR-183-5p|0|0	miR-183-5p|0|0	TATGGCACTGGTAGAATTCACT	canonical miRNA
MIMAT0000456|hsa-miR-186-5p|0|+1	miR-186-5p|0|+1	CAAAGAATTCTCCTTTTGGGCTT	isomiR	end-site
MIMAT0000456|hsa-miR-186-5p|0|0	miR-186-5p|0|0	CAAAGAATTCTCCTTTTGGGCT	canonical miRNA
MIMAT0000456|hsa-miR-186-5p|0|-1	miR-186-5p|0|-1	CAAAGAATTCTCCTTTTGGGC	isomiR	end-site
MIMAT0000440|hsa-miR-191-5p|+1|0	miR-191-5p|+1|0	AACGGAATCCCAAAAGCAGCTG	isomiR	start-site
MIMAT0000440|hsa-miR-191-5p|0|+1	miR-191-5p|0|+1	CAACGGAATCCCAAAAGCAGCTGT	isomiR	end-site
MIMAT0000440|hsa-miR-191-5p|0|0	miR-191-5p|0|0	CAACGGAATCCCAAAAGCAGCTG	canonical miRNA
MIMAT0000440|hsa-miR-191-5p|0|-1	miR-191-5p|0|-1	CAACGGAATCCCAAAAGCAGCT	isomiR	end-site
MIMAT0000440|hsa-miR-191-5p|0|-1(+1U)	miR-191-5p|0|-1(+1U)	CAACGGAATCCCAAAAGCAGCTT	isomiR	mixed: end-site + 3’ non-templated addition
MIMAT0000440|hsa-miR-191-5p|0|-2	miR-191-5p|0|-2	CAACGGAATCCCAAAAGCAGC	isomiR	end-site
MIMAT0000440|hsa-miR-191-5p|0|-3	miR-191-5p|0|-3	CAACGGAATCCCAAAAGCAG	isomiR	end-site
MIMAT0000222|hsa-miR-192-5p|0|0	miR-192-5p|0|0	CTGACCTATGAATTGACAGCC	canonical miRNA (without isomiRs)
MIMAT0000459|hsa-miR-193a-3p|0|0	miR-193a-3p|0|0	AACTGGCCTACAAAGTCCCAGT	canonical miRNA (without isomiRs)
MIMAT0002819|hsa-miR-193b-3p|0|+1	miR-193b-3p|0|+1	AACTGGCCCTCAAAGTCCCGCTT	isomiR	end-site
MIMAT0002819|hsa-miR-193b-3p|0|0	miR-193b-3p|0|0	AACTGGCCCTCAAAGTCCCGCT	canonical miRNA
MIMAT0000461|hsa-miR-195-5p|0|+1	miR-195-5p|0|+1	TAGCAGCACAGAAATATTGGCA	isomiR	end-site
MIMAT0000461|hsa-miR-195-5p|0|0	miR-195-5p|0|0	TAGCAGCACAGAAATATTGGC	canonical miRNA
MIMAT0000226|hsa-miR-196a-5p|0|+1	miR-196a-5p|0|+1	TAGGTAGTTTCATGTTGTTGGGA	isomiR	3' non-templated addition
MIMAT0000226|hsa-miR-196a-5p|0|0	miR-196a-5p|0|0	TAGGTAGTTTCATGTTGTTGGG	canonical miRNA
MIMAT0000226|hsa-miR-196a-5p|0|0(+1U)	miR-196a-5p|0|0(+1U)	TAGGTAGTTTCATGTTGTTGGGT	isomiR	3' non-templated addition
MIMAT0000227|hsa-miR-197-3p|0|0	miR-197-3p|0|0	TTCACCACCTTCTCCACCCAGC	canonical miRNA (without isomiRs)
MIMAT0000232|hsa-miR-199a-3p|+1|0	miR-199a-3p|+1|0	CAGTAGTCTGCACATTGGTTA	isomiR	start-site
MIMAT0000232|hsa-miR-199a-3p|+1|-1	miR-199a-3p|+1|-1	CAGTAGTCTGCACATTGGTT	isomiR	mixed: start-site + end-site
MIMAT0000232|hsa-miR-199a-3p|0|0	miR-199a-3p|0|0	ACAGTAGTCTGCACATTGGTTA	canonical miRNA
MIMAT0000232|hsa-miR-199a-3p|0|0(+1U)	miR-199a-3p|0|0(+1U)	ACAGTAGTCTGCACATTGGTTAT	isomiR	3' non-templated addition
MIMAT0000232|hsa-miR-199a-3p|0|-1	miR-199a-3p|0|-1	ACAGTAGTCTGCACATTGGTT	isomiR	end-site
MIMAT0000232|hsa-miR-199a-3p|0|-1(+1U)	miR-199a-3p|0|-1(+1U)	ACAGTAGTCTGCACATTGGTTT	isomiR	mixed: end-site + 3’ non-templated addition
MIMAT0000232|hsa-miR-199a-3p|0|-2	miR-199a-3p|0|-2	ACAGTAGTCTGCACATTGGT	isomiR	end-site
MIMAT0000232|hsa-miR-199a-3p|-1|0	miR-199a-3p|-1|0	TACAGTAGTCTGCACATTGGTTA	isomiR	start-site
MIMAT0000232|hsa-miR-199a-3p|-1|-1	miR-199a-3p|-1|-1	TACAGTAGTCTGCACATTGGTT	isomiR	shifted
MIMAT0000232|hsa-miR-199a-3p|-1|-2	miR-199a-3p|-1|-2	TACAGTAGTCTGCACATTGGT	isomiR	mixed: start-site + end-site
MIMAT0000231|hsa-miR-199a-5p|0|0	miR-199a-5p|0|0	CCCAGTGTTCAGACTACCTGTTC	canonical miRNA
MIMAT0000231|hsa-miR-199a-5p|0|0(+1U)	miR-199a-5p|0|0(+1U)	CCCAGTGTTCAGACTACCTGTTCT	isomiR	3' non-templated addition
MIMAT0000231|hsa-miR-199a-5p|0|-1	miR-199a-5p|0|-1	CCCAGTGTTCAGACTACCTGTT	isomiR	end-site
MIMAT0000231|hsa-miR-199a-5p|0|-1(+1U)	miR-199a-5p|0|-1(+1U)	CCCAGTGTTCAGACTACCTGTTT	isomiR	mixed: end-site + 3’ non-templated addition
MIMAT0000231|hsa-miR-199a-5p|0|-2	miR-199a-5p|0|-2	CCCAGTGTTCAGACTACCTGT	isomiR	end-site
MIMAT0000263|hsa-miR-199b-5p|0|+1	miR-199b-5p|0|+1	CCCAGTGTTTAGACTATCTGTTCA	isomiR	end-site
MIMAT0000263|hsa-miR-199b-5p|0|0	miR-199b-5p|0|0	CCCAGTGTTTAGACTATCTGTTC	canonical miRNA
MIMAT0000263|hsa-miR-199b-5p|0|0(+1U)	miR-199b-5p|0|0(+1U)	CCCAGTGTTTAGACTATCTGTTCT	isomiR	3' non-templated addition
MIMAT0000263|hsa-miR-199b-5p|0|-1	miR-199b-5p|0|-1	CCCAGTGTTTAGACTATCTGTT	isomiR	end-site
MIMAT0000263|hsa-miR-199b-5p|0|-2	miR-199b-5p|0|-2	CCCAGTGTTTAGACTATCTGT	isomiR	end-site
MIMAT0000073|hsa-miR-19a-3p|0|-1	miR-19a-3p|0|-1	TGTGCAAATCTATGCAAAACTG	isomiR (orphan)	end-site
MIMAT0000074|hsa-miR-19b-3p|0|0	miR-19b-3p|0|0	TGTGCAAATCCATGCAAAACTGA	canonical miRNA
MIMAT0000074|hsa-miR-19b-3p|0|-1	miR-19b-3p|0|-1	TGTGCAAATCCATGCAAAACTG	isomiR	end-site
MIMAT0000682|hsa-miR-200a-3p|0|+1	miR-200a-3p|0|+1	TAACACTGTCTGGTAACGATGTT	isomiR	end-site
MIMAT0000682|hsa-miR-200a-3p|0|0	miR-200a-3p|0|0	TAACACTGTCTGGTAACGATGT	canonical miRNA
MIMAT0000682|hsa-miR-200a-3p|0|-1	miR-200a-3p|0|-1	TAACACTGTCTGGTAACGATG	isomiR	end-site
MIMAT0000318|hsa-miR-200b-3p|+1|+1(+1U)	miR-200b-3p|+1|+1(+1U)	AATACTGCCTGGTAATGATGACT	isomiR	mixed: shifted + 3’ non-templated addition
MIMAT0000318|hsa-miR-200b-3p|0|+1	miR-200b-3p|0|+1	TAATACTGCCTGGTAATGATGAC	isomiR	end-site
MIMAT0000318|hsa-miR-200b-3p|0|+1(+1U)	miR-200b-3p|0|+1(+1U)	TAATACTGCCTGGTAATGATGACT	isomiR	mixed: end-site + 3’ non-templated addition
MIMAT0000318|hsa-miR-200b-3p|0|0	miR-200b-3p|0|0	TAATACTGCCTGGTAATGATGA	canonical miRNA
MIMAT0000617|hsa-miR-200c-3p|0|0	miR-200c-3p|0|0	TAATACTGCCGGGTAATGATGGA	canonical miRNA
MIMAT0000617|hsa-miR-200c-3p|0|-1	miR-200c-3p|0|-1	TAATACTGCCGGGTAATGATGG	isomiR	end-site
MIMAT0000264|hsa-miR-203a-3p|+1|+1	miR-203a-3p|+1|+1	TGAAATGTTTAGGACCACTAGA	isomiR	shifted
MIMAT0000264|hsa-miR-203a-3p|+1|0	miR-203a-3p|+1|0	TGAAATGTTTAGGACCACTAG	isomiR	start-site
MIMAT0000264|hsa-miR-203a-3p|+1|0(+1U)	miR-203a-3p|+1|0(+1U)	TGAAATGTTTAGGACCACTAGT	isomiR	mixed: start-site + 3’ non-templated addition
MIMAT0000264|hsa-miR-203a-3p|+1|0(+2U)	miR-203a-3p|+1|0(+2U)	TGAAATGTTTAGGACCACTAGTT	isomiR	mixed: start-site + 3’ non-templated addition
MIMAT0000264|hsa-miR-203a-3p|+1|-2	miR-203a-3p|+1|-2	TGAAATGTTTAGGACCACT	isomiR	mixed: start-site + end-site
MIMAT0000264|hsa-miR-203a-3p|0|+1	miR-203a-3p|0|+1	GTGAAATGTTTAGGACCACTAGA	isomiR	end-site
MIMAT0000264|hsa-miR-203a-3p|0|0	miR-203a-3p|0|0	GTGAAATGTTTAGGACCACTAG	canonical miRNA
MIMAT0000264|hsa-miR-203a-3p|0|0(+1U)	miR-203a-3p|0|0(+1U)	GTGAAATGTTTAGGACCACTAGT	isomiR	3' non-templated addition
MIMAT0000264|hsa-miR-203a-3p|0|-1	miR-203a-3p|0|-1	GTGAAATGTTTAGGACCACTA	isomiR	end-site
MIMAT0000264|hsa-miR-203a-3p|0|-2	miR-203a-3p|0|-2	GTGAAATGTTTAGGACCACT	isomiR	end-site
MIMAT0000265|hsa-miR-204-5p|0|+1	miR-204-5p|0|+1	TTCCCTTTGTCATCCTATGCCTG	isomiR	end-site
MIMAT0000265|hsa-miR-204-5p|0|0	miR-204-5p|0|0	TTCCCTTTGTCATCCTATGCCT	canonical miRNA
MIMAT0000266|hsa-miR-205-5p|0|+1	miR-205-5p|0|+1	TCCTTCATTCCACCGGAGTCTGT	isomiR	end-site
MIMAT0000266|hsa-miR-205-5p|0|+1(+1U)	miR-205-5p|0|+1(+1U)	TCCTTCATTCCACCGGAGTCTGTT	isomiR	mixed: end-site + 3’ non-templated addition
MIMAT0000266|hsa-miR-205-5p|0|0	miR-205-5p|0|0	TCCTTCATTCCACCGGAGTCTG	canonical miRNA
MIMAT0000266|hsa-miR-205-5p|0|-1	miR-205-5p|0|-1	TCCTTCATTCCACCGGAGTCT	isomiR	end-site
MIMAT0000266|hsa-miR-205-5p|0|-2	miR-205-5p|0|-2	TCCTTCATTCCACCGGAGTC	isomiR	end-site
MIMAT0000266|hsa-miR-205-5p|0|-3	miR-205-5p|0|-3	TCCTTCATTCCACCGGAGT	isomiR	end-site
MIMAT0000075|hsa-miR-20a-5p|0|0	miR-20a-5p|0|0	TAAAGTGCTTATAGTGCAGGTAG	canonical miRNA (without isomiRs)
MIMAT0000267|hsa-miR-210-3p|0|0	miR-210-3p|0|0	CTGTGCGTGTGACAGCGGCTGA	canonical miRNA (without isomiRs)
MIMAT0000268|hsa-miR-211-5p|+3|0	miR-211-5p|+3|0	CCTTTGTCATCCTTCGCCT	isomiR	start-site
MIMAT0000268|hsa-miR-211-5p|0|+1	miR-211-5p|0|+1	TTCCCTTTGTCATCCTTCGCCTA	isomiR	end-site
MIMAT0000268|hsa-miR-211-5p|0|0	miR-211-5p|0|0	TTCCCTTTGTCATCCTTCGCCT	canonical miRNA
MIMAT0000268|hsa-miR-211-5p|0|0(+1U)	miR-211-5p|0|0(+1U)	TTCCCTTTGTCATCCTTCGCCTT	isomiR	3' non-templated addition
MIMAT0000268|hsa-miR-211-5p|0|0(+2U)	miR-211-5p|0|0(+2U)	TTCCCTTTGTCATCCTTCGCCTTT	isomiR	3' non-templated addition
MIMAT0000268|hsa-miR-211-5p|0|-1	miR-211-5p|0|-1	TTCCCTTTGTCATCCTTCGCC	isomiR	end-site
MIMAT0004494|hsa-miR-21-3p|0|0	miR-21-3p|0|0	CAACACCAGTCGATGGGCTGT	canonical miRNA (without isomiRs)
MIMAT0000271|hsa-miR-214-3p|0|0	miR-214-3p|0|0	ACAGCAGGCACAGACAGGCAGT	canonical miRNA (without isomiRs)
MIMAT0000076|hsa-miR-21-5p|0|+1	miR-21-5p|0|+1	TAGCTTATCAGACTGATGTTGAC	isomiR	end-site
MIMAT0000076|hsa-miR-21-5p|0|+2	miR-21-5p|0|+2	TAGCTTATCAGACTGATGTTGACT	isomiR	end-site
MIMAT0000076|hsa-miR-21-5p|0|0	miR-21-5p|0|0	TAGCTTATCAGACTGATGTTGA	canonical miRNA
MIMAT0000076|hsa-miR-21-5p|0|-1	miR-21-5p|0|-1	TAGCTTATCAGACTGATGTTG	isomiR	end-site
MIMAT0000076|hsa-miR-21-5p|0|-2	miR-21-5p|0|-2	TAGCTTATCAGACTGATGTT	isomiR	end-site
MIMAT0000076|hsa-miR-21-5p|0|-3	miR-21-5p|0|-3	TAGCTTATCAGACTGATGT	isomiR	end-site
MIMAT0000278|hsa-miR-221-3p|0|0	miR-221-3p|0|0	AGCTACATTGTCTGCTGGGTTTC	canonical miRNA
MIMAT0000278|hsa-miR-221-3p|0|0(+1U)	miR-221-3p|0|0(+1U)	AGCTACATTGTCTGCTGGGTTTCT	isomiR	3' non-templated addition
MIMAT0000278|hsa-miR-221-3p|0|-1	miR-221-3p|0|-1	AGCTACATTGTCTGCTGGGTTT	isomiR	end-site
MIMAT0000278|hsa-miR-221-3p|0|-1(+1U)	miR-221-3p|0|-1(+1U)	AGCTACATTGTCTGCTGGGTTTT	isomiR	mixed: end-site + 3’ non-templated addition
MIMAT0000278|hsa-miR-221-3p|0|-2	miR-221-3p|0|-2	AGCTACATTGTCTGCTGGGTT	isomiR	end-site
MIMAT0000278|hsa-miR-221-3p|0|-3	miR-221-3p|0|-3	AGCTACATTGTCTGCTGGGT	isomiR	end-site
MIMAT0000279|hsa-miR-222-3p|0|+1	miR-222-3p|0|+1	AGCTACATCTGGCTACTGGGTC	isomiR	end-site
MIMAT0000279|hsa-miR-222-3p|0|+2	miR-222-3p|0|+2	AGCTACATCTGGCTACTGGGTCT	isomiR	end-site
MIMAT0000279|hsa-miR-222-3p|0|+2(+1U)	miR-222-3p|0|+2(+1U)	AGCTACATCTGGCTACTGGGTCTT	isomiR	mixed: end-site + 3’ non-templated addition
MIMAT0000279|hsa-miR-222-3p|0|+3	miR-222-3p|0|+3	AGCTACATCTGGCTACTGGGTCTC	isomiR	end-site
MIMAT0000279|hsa-miR-222-3p|0|+4	miR-222-3p|0|+4	AGCTACATCTGGCTACTGGGTCTCT	isomiR	end-site
MIMAT0000279|hsa-miR-222-3p|0|0	miR-222-3p|0|0	AGCTACATCTGGCTACTGGGT	canonical miRNA
MIMAT0000077|hsa-miR-22-3p|0|0	miR-22-3p|0|0	AAGCTGCCAGTTGAAGAACTGT	canonical miRNA
MIMAT0000077|hsa-miR-22-3p|0|-1	miR-22-3p|0|-1	AAGCTGCCAGTTGAAGAACTG	isomiR	end-site
MIMAT0000077|hsa-miR-22-3p|0|-2	miR-22-3p|0|-2	AAGCTGCCAGTTGAAGAACT	isomiR	end-site
MIMAT0000077|hsa-miR-22-3p|0|-3	miR-22-3p|0|-3	AAGCTGCCAGTTGAAGAAC	isomiR	end-site
MIMAT0000281|hsa-miR-224-5p|+1|0	miR-224-5p|+1|0	CAAGTCACTAGTGGTTCCGTTTAG	isomiR (orphan)	start-site
MIMAT0000281|hsa-miR-224-5p|+1|-2	miR-224-5p|+1|-2	CAAGTCACTAGTGGTTCCGTTT	isomiR (orphan)	mixed: start-site + end-site
MIMAT0000078|hsa-miR-23a-3p|+3|+1	miR-23a-3p|+3|+1	ACATTGCCAGGGATTTCCA	isomiR (orphan)	mixed: start-site + end-site
MIMAT0000078|hsa-miR-23a-3p|+3|+2	miR-23a-3p|+3|+2	ACATTGCCAGGGATTTCCAA	isomiR (orphan)	mixed: start-site + end-site
MIMAT0000078|hsa-miR-23a-3p|+3|0	miR-23a-3p|+3|0	ACATTGCCAGGGATTTCC	isomiR (orphan)	start-site
MIMAT0000418|hsa-miR-23b-3p|+3|0	miR-23b-3p|+3|0	ACATTGCCAGGGATTACCAC	isomiR (orphan)	start-site
MIMAT0000418|hsa-miR-23b-3p|+3|0(+1U)	miR-23b-3p|+3|0(+1U)	ACATTGCCAGGGATTACCACT	isomiR (orphan)	mixed: start-site + 3’ non-templated addition
MIMAT0000418|hsa-miR-23b-3p|+3|-1	miR-23b-3p|+3|-1	ACATTGCCAGGGATTACCA	isomiR (orphan)	mixed: start-site + end-site
MIMAT0000418|hsa-miR-23b-3p|+3|-2	miR-23b-3p|+3|-2	ACATTGCCAGGGATTACC	isomiR (orphan)	mixed: start-site + end-site
MIMAT0000080|hsa-miR-24-3p|0|0(+1U)	miR-24-3p|0|0(+1U)	TGGCTCAGTTCAGCAGGAACAGT	isomiR (orphan)	3' non-templated addition
MIMAT0000080|hsa-miR-24-3p|0|-2	miR-24-3p|0|-2	TGGCTCAGTTCAGCAGGAAC	isomiR (orphan)	end-site
MIMAT0000081|hsa-miR-25-3p|0|0	miR-25-3p|0|0	CATTGCACTTGTCTCGGTCTGA	canonical miRNA
MIMAT0000081|hsa-miR-25-3p|0|-1	miR-25-3p|0|-1	CATTGCACTTGTCTCGGTCTG	isomiR	end-site
MIMAT0000081|hsa-miR-25-3p|0|-2	miR-25-3p|0|-2	CATTGCACTTGTCTCGGTCT	isomiR	end-site
MIMAT0000082|hsa-miR-26a-5p|+1|0	miR-26a-5p|+1|0	TCAAGTAATCCAGGATAGGCT	isomiR	start-site
MIMAT0000082|hsa-miR-26a-5p|+3|0	miR-26a-5p|+3|0	AAGTAATCCAGGATAGGCT	isomiR	start-site
MIMAT0000082|hsa-miR-26a-5p|+3|0(+1U)	miR-26a-5p|+3|0(+1U)	AAGTAATCCAGGATAGGCTT	isomiR	mixed: start-site + 3’ non-templated addition
MIMAT0000082|hsa-miR-26a-5p|+3|-1	miR-26a-5p|+3|-1	AAGTAATCCAGGATAGGC	isomiR	mixed: start-site + end-site
MIMAT0000082|hsa-miR-26a-5p|0|+1	miR-26a-5p|0|+1	TTCAAGTAATCCAGGATAGGCTG	isomiR	end-site
MIMAT0000082|hsa-miR-26a-5p|0|0	miR-26a-5p|0|0	TTCAAGTAATCCAGGATAGGCT	canonical miRNA
MIMAT0000082|hsa-miR-26a-5p|0|0(+1U)	miR-26a-5p|0|0(+1U)	TTCAAGTAATCCAGGATAGGCTT	isomiR	3' non-templated addition
MIMAT0000082|hsa-miR-26a-5p|0|0(+2U)	miR-26a-5p|0|0(+2U)	TTCAAGTAATCCAGGATAGGCTTT	isomiR	3' non-templated addition
MIMAT0000082|hsa-miR-26a-5p|0|-1	miR-26a-5p|0|-1	TTCAAGTAATCCAGGATAGGC	isomiR	end-site
MIMAT0000082|hsa-miR-26a-5p|0|-2	miR-26a-5p|0|-2	TTCAAGTAATCCAGGATAGG	isomiR	end-site
MIMAT0000082|hsa-miR-26a-5p|0|-2(+2U)	miR-26a-5p|0|-2(+2U)	TTCAAGTAATCCAGGATAGGTT	isomiR	mixed: end-site + 3’ non-templated addition
MIMAT0000082|hsa-miR-26a-5p|0|-3	miR-26a-5p|0|-3	TTCAAGTAATCCAGGATAG	isomiR	end-site
MIMAT0000083|hsa-miR-26b-5p|0|+1	miR-26b-5p|0|+1	TTCAAGTAATTCAGGATAGGTT	isomiR	end-site
MIMAT0000083|hsa-miR-26b-5p|0|+1(+1U)	miR-26b-5p|0|+1(+1U)	TTCAAGTAATTCAGGATAGGTTT	isomiR	mixed: end-site + 3’ non-templated addition
MIMAT0000083|hsa-miR-26b-5p|0|0	miR-26b-5p|0|0	TTCAAGTAATTCAGGATAGGT	canonical miRNA
MIMAT0000083|hsa-miR-26b-5p|0|-1	miR-26b-5p|0|-1	TTCAAGTAATTCAGGATAGG	isomiR	end-site
MIMAT0000084|hsa-miR-27a-3p|0|0	miR-27a-3p|0|0	TTCACAGTGGCTAAGTTCCGC	canonical miRNA
MIMAT0000084|hsa-miR-27a-3p|0|0(+1U)	miR-27a-3p|0|0(+1U)	TTCACAGTGGCTAAGTTCCGCT	isomiR	3' non-templated addition
MIMAT0000084|hsa-miR-27a-3p|0|-1	miR-27a-3p|0|-1	TTCACAGTGGCTAAGTTCCG	isomiR	end-site
MIMAT0000084|hsa-miR-27a-3p|0|-1(+1U)	miR-27a-3p|0|-1(+1U)	TTCACAGTGGCTAAGTTCCGT	isomiR	mixed: end-site + 3’ non-templated addition
MIMAT0000084|hsa-miR-27a-3p|0|-2	miR-27a-3p|0|-2	TTCACAGTGGCTAAGTTCC	isomiR	end-site
MIMAT0000084|hsa-miR-27a-3p|0|-3	miR-27a-3p|0|-3	TTCACAGTGGCTAAGTTC	isomiR	end-site
MIMAT0000419|hsa-miR-27b-3p|+3|0	miR-27b-3p|+3|0	ACAGTGGCTAAGTTCTGC	isomiR	start-site
MIMAT0000419|hsa-miR-27b-3p|0|+1	miR-27b-3p|0|+1	TTCACAGTGGCTAAGTTCTGCA	isomiR	end-site
MIMAT0000419|hsa-miR-27b-3p|0|+1(+1U)	miR-27b-3p|0|+1(+1U)	TTCACAGTGGCTAAGTTCTGCAT	isomiR	mixed: end-site + 3’ non-templated addition
MIMAT0000419|hsa-miR-27b-3p|0|0	miR-27b-3p|0|0	TTCACAGTGGCTAAGTTCTGC	canonical miRNA
MIMAT0000419|hsa-miR-27b-3p|0|0(+1U)	miR-27b-3p|0|0(+1U)	TTCACAGTGGCTAAGTTCTGCT	isomiR	3' non-templated addition
MIMAT0000419|hsa-miR-27b-3p|0|0(+2U)	miR-27b-3p|0|0(+2U)	TTCACAGTGGCTAAGTTCTGCTT	isomiR	3' non-templated addition
MIMAT0000419|hsa-miR-27b-3p|0|-1	miR-27b-3p|0|-1	TTCACAGTGGCTAAGTTCTG	isomiR	end-site
MIMAT0000419|hsa-miR-27b-3p|0|-1(+1U)	miR-27b-3p|0|-1(+1U)	TTCACAGTGGCTAAGTTCTGT	isomiR	mixed: end-site + 3’ non-templated addition
MIMAT0000419|hsa-miR-27b-3p|0|-2	miR-27b-3p|0|-2	TTCACAGTGGCTAAGTTCT	isomiR	end-site
MIMAT0000419|hsa-miR-27b-3p|-1|-1	miR-27b-3p|-1|-1	GTTCACAGTGGCTAAGTTCTG	isomiR	shifted
MIMAT0004588|hsa-miR-27b-5p|0|0	miR-27b-5p|0|0	AGAGCTTAGCTGATTGGTGAAC	canonical miRNA (without isomiRs)
MIMAT0004502|hsa-miR-28-3p|0|0	miR-28-3p|0|0	CACTAGATTGTGAGCTCCTGGA	canonical miRNA
MIMAT0004502|hsa-miR-28-3p|0|0(+1U)	miR-28-3p|0|0(+1U)	CACTAGATTGTGAGCTCCTGGAT	isomiR	3' non-templated addition
MIMAT0004502|hsa-miR-28-3p|0|-1	miR-28-3p|0|-1	CACTAGATTGTGAGCTCCTGG	isomiR	end-site
MIMAT0000085|hsa-miR-28-5p|0|0	miR-28-5p|0|0	AAGGAGCTCACAGTCTATTGAG	canonical miRNA
MIMAT0000085|hsa-miR-28-5p|0|-1	miR-28-5p|0|-1	AAGGAGCTCACAGTCTATTGA	isomiR	end-site
MIMAT0000086|hsa-miR-29a-3p|0|+1	miR-29a-3p|0|+1	TAGCACCATCTGAAATCGGTTAT	isomiR	end-site
MIMAT0000086|hsa-miR-29a-3p|0|0	miR-29a-3p|0|0	TAGCACCATCTGAAATCGGTTA	canonical miRNA
MIMAT0000086|hsa-miR-29a-3p|0|-1	miR-29a-3p|0|-1	TAGCACCATCTGAAATCGGTT	isomiR	end-site
MIMAT0000086|hsa-miR-29a-3p|0|-2	miR-29a-3p|0|-2	TAGCACCATCTGAAATCGGT	isomiR	end-site
MIMAT0000086|hsa-miR-29a-3p|-1|-1	miR-29a-3p|-1|-1	CTAGCACCATCTGAAATCGGTT	isomiR	shifted
MIMAT0000100|hsa-miR-29b-3p|0|0	miR-29b-3p|0|0	TAGCACCATTTGAAATCAGTGTT	canonical miRNA (without isomiRs)
MIMAT0000681|hsa-miR-29c-3p|0|0	miR-29c-3p|0|0	TAGCACCATTTGAAATCGGTTA	canonical miRNA
MIMAT0000681|hsa-miR-29c-3p|0|-1	miR-29c-3p|0|-1	TAGCACCATTTGAAATCGGTT	isomiR	end-site
MIMAT0000688|hsa-miR-301a-3p|0|0	miR-301a-3p|0|0	CAGTGCAATAGTATTGTCAAAGC	canonical miRNA (without isomiRs)
MIMAT0000088|hsa-miR-30a-3p|0|0	miR-30a-3p|0|0	CTTTCAGTCGGATGTTTGCAGC	canonical miRNA (without isomiRs)
MIMAT0000087|hsa-miR-30a-5p|+1|+2	miR-30a-5p|+1|+2	GTAAACATCCTCGACTGGAAGCT	isomiR	mixed: start-site + end-site
MIMAT0000087|hsa-miR-30a-5p|0|+1	miR-30a-5p|0|+1	TGTAAACATCCTCGACTGGAAGC	isomiR	end-site
MIMAT0000087|hsa-miR-30a-5p|0|+2	miR-30a-5p|0|+2	TGTAAACATCCTCGACTGGAAGCT	isomiR	end-site
MIMAT0000087|hsa-miR-30a-5p|0|0	miR-30a-5p|0|0	TGTAAACATCCTCGACTGGAAG	canonical miRNA
MIMAT0000087|hsa-miR-30a-5p|0|0(+1U)	miR-30a-5p|0|0(+1U)	TGTAAACATCCTCGACTGGAAGT	isomiR	3' non-templated addition
MIMAT0000087|hsa-miR-30a-5p|0|-1	miR-30a-5p|0|-1	TGTAAACATCCTCGACTGGAA	isomiR	end-site
MIMAT0000087|hsa-miR-30a-5p|0|-2	miR-30a-5p|0|-2	TGTAAACATCCTCGACTGGA	isomiR	end-site
MIMAT0000420|hsa-miR-30b-5p|0|0	miR-30b-5p|0|0	TGTAAACATCCTACACTCAGCT	canonical miRNA
MIMAT0000420|hsa-miR-30b-5p|0|-1	miR-30b-5p|0|-1	TGTAAACATCCTACACTCAGC	isomiR	end-site
MIMAT0000244|hsa-miR-30c-5p|0|+1	miR-30c-5p|0|+1	TGTAAACATCCTACACTCTCAGCT	isomiR	end-site
MIMAT0000244|hsa-miR-30c-5p|0|0	miR-30c-5p|0|0	TGTAAACATCCTACACTCTCAGC	canonical miRNA
MIMAT0004551|hsa-miR-30d-3p|0|0	miR-30d-3p|0|0	CTTTCAGTCAGATGTTTGCTGC	canonical miRNA (without isomiRs)
MIMAT0000245|hsa-miR-30d-5p|0|+1	miR-30d-5p|0|+1	TGTAAACATCCCCGACTGGAAGC	isomiR	end-site
MIMAT0000245|hsa-miR-30d-5p|0|+2	miR-30d-5p|0|+2	TGTAAACATCCCCGACTGGAAGCT	isomiR	end-site
MIMAT0000245|hsa-miR-30d-5p|0|+2(+1U)	miR-30d-5p|0|+2(+1U)	TGTAAACATCCCCGACTGGAAGCTT	isomiR	mixed: end-site + 3’ non-templated addition
MIMAT0000245|hsa-miR-30d-5p|0|0	miR-30d-5p|0|0	TGTAAACATCCCCGACTGGAAG	canonical miRNA
MIMAT0000245|hsa-miR-30d-5p|0|0(+1U)	miR-30d-5p|0|0(+1U)	TGTAAACATCCCCGACTGGAAGT	isomiR	3' non-templated addition
MIMAT0000245|hsa-miR-30d-5p|0|-1	miR-30d-5p|0|-1	TGTAAACATCCCCGACTGGAA	isomiR	end-site
MIMAT0000245|hsa-miR-30d-5p|0|-2	miR-30d-5p|0|-2	TGTAAACATCCCCGACTGGA	isomiR	end-site
MIMAT0000693|hsa-miR-30e-3p|0|0	miR-30e-3p|0|0	CTTTCAGTCGGATGTTTACAGC	canonical miRNA (without isomiRs)
MIMAT0000692|hsa-miR-30e-5p|+1|+2	miR-30e-5p|+1|+2	GTAAACATCCTTGACTGGAAGCT	isomiR (orphan)	mixed: start-site + end-site
MIMAT0000692|hsa-miR-30e-5p|0|+1	miR-30e-5p|0|+1	TGTAAACATCCTTGACTGGAAGC	isomiR (orphan)	end-site
MIMAT0000692|hsa-miR-30e-5p|0|+2	miR-30e-5p|0|+2	TGTAAACATCCTTGACTGGAAGCT	isomiR (orphan)	end-site
MIMAT0000692|hsa-miR-30e-5p|0|+2(+1U)	miR-30e-5p|0|+2(+1U)	TGTAAACATCCTTGACTGGAAGCTT	isomiR (orphan)	mixed: end-site + 3’ non-templated addition
MIMAT0000692|hsa-miR-30e-5p|0|-1	miR-30e-5p|0|-1	TGTAAACATCCTTGACTGGAA	isomiR (orphan)	end-site
MIMAT0000692|hsa-miR-30e-5p|0|-2	miR-30e-5p|0|-2	TGTAAACATCCTTGACTGGA	isomiR (orphan)	end-site
MIMAT0000089|hsa-miR-31-5p|0|+1	miR-31-5p|0|+1	AGGCAAGATGCTGGCATAGCTG	isomiR (orphan)	end-site
MIMAT0000510|hsa-miR-320a-3p|0|+1	miR-320a-3p|0|+1	AAAAGCTGGGTTGAGAGGGCGAA	isomiR	end-site
MIMAT0000510|hsa-miR-320a-3p|0|+1(+1U)	miR-320a-3p|0|+1(+1U)	AAAAGCTGGGTTGAGAGGGCGAAT	isomiR	mixed: end-site + 3’ non-templated addition
MIMAT0000510|hsa-miR-320a-3p|0|+2	miR-320a-3p|0|+2	AAAAGCTGGGTTGAGAGGGCGAAA	isomiR	end-site
MIMAT0000510|hsa-miR-320a-3p|0|0	miR-320a-3p|0|0	AAAAGCTGGGTTGAGAGGGCGA	canonical miRNA
MIMAT0000510|hsa-miR-320a-3p|0|0(+1U)	miR-320a-3p|0|0(+1U)	AAAAGCTGGGTTGAGAGGGCGAT	isomiR	3' non-templated addition
MIMAT0000510|hsa-miR-320a-3p|0|0(+2U)	miR-320a-3p|0|0(+2U)	AAAAGCTGGGTTGAGAGGGCGATT	isomiR	3' non-templated addition
MIMAT0000510|hsa-miR-320a-3p|0|-1	miR-320a-3p|0|-1	AAAAGCTGGGTTGAGAGGGCG	isomiR	end-site
MIMAT0000510|hsa-miR-320a-3p|0|-1(+1U)	miR-320a-3p|0|-1(+1U)	AAAAGCTGGGTTGAGAGGGCGT	isomiR	mixed: end-site + 3’ non-templated addition
MIMAT0005792|hsa-miR-320b|0|-2	miR-320b|0|-2	AAAAGCTGGGTTGAGAGGGC	isomiR (orphan)	end-site
MIMAT0000752|hsa-miR-328-3p|0|0	miR-328-3p|0|0	CTGGCCCTCTCTGCCCTTCCGT	canonical miRNA
MIMAT0000752|hsa-miR-328-3p|0|0(+1U)	miR-328-3p|0|0(+1U)	CTGGCCCTCTCTGCCCTTCCGTT	isomiR	3' non-templated addition
MIMAT0000763|hsa-miR-338-3p|0|0	miR-338-3p|0|0	TCCAGCATCAGTGATTTTGTTG	canonical miRNA (without isomiRs)
MIMAT0004692|hsa-miR-340-5p|0|0	miR-340-5p|0|0	TTATAAAGCAATGAGACTGATT	canonical miRNA
MIMAT0004692|hsa-miR-340-5p|0|-1	miR-340-5p|0|-1	TTATAAAGCAATGAGACTGAT	isomiR	end-site
MIMAT0000753|hsa-miR-342-3p|0|+1	miR-342-3p|0|+1	TCTCACACAGAAATCGCACCCGTC	isomiR	end-site
MIMAT0000753|hsa-miR-342-3p|0|0	miR-342-3p|0|0	TCTCACACAGAAATCGCACCCGT	canonical miRNA
MIMAT0000753|hsa-miR-342-3p|0|-1	miR-342-3p|0|-1	TCTCACACAGAAATCGCACCCG	isomiR	end-site
MIMAT0000772|hsa-miR-345-5p|0|0	miR-345-5p|0|0	GCTGACTCCTAGTCCAGGGCTC	canonical miRNA (without isomiRs)
MIMAT0000686|hsa-miR-34c-5p|0|0	miR-34c-5p|0|0	AGGCAGTGTAGTTAGCTGATTGC	canonical miRNA (without isomiRs)
MIMAT0004682|hsa-miR-361-3p|0|-1	miR-361-3p|0|-1	TCCCCCAGGTGTGATTCTGATT	isomiR (orphan)	end-site
MIMAT0000703|hsa-miR-361-5p|0|0	miR-361-5p|0|0	TTATCAGAATCTCCAGGGGTAC	canonical miRNA (without isomiRs)
MIMAT0000710|hsa-miR-365a-3p|0|0	miR-365a-3p|0|0	TAATGCCCCTAAAAATCCTTAT	canonical miRNA (without isomiRs)
MIMAT0004688|hsa-miR-374a-3p|0|0	miR-374a-3p|0|0	CTTATCAGATTGTATTGTAATT	canonical miRNA (without isomiRs)
MIMAT0000728|hsa-miR-375-3p|0|0	miR-375-3p|0|0	TTTGTTCGTTCGGCTCGCGTGA	canonical miRNA (without isomiRs)
MIMAT0000736|hsa-miR-381-3p|0|0	miR-381-3p|0|0	TATACAAGGGCAAGCTCTCTGT	canonical miRNA (without isomiRs)
MIMAT0001639|hsa-miR-409-3p|0|0	miR-409-3p|0|0	GAATGTTGCTCGGTGAACCCCT	canonical miRNA
MIMAT0001639|hsa-miR-409-3p|-1|0	miR-409-3p|-1|0	CGAATGTTGCTCGGTGAACCCCT	isomiR	start-site
MIMAT0003329|hsa-miR-411-5p|0|0	miR-411-5p|0|0	TAGTAGACCGTATAGCGTACG	canonical miRNA
MIMAT0003329|hsa-miR-411-5p|-1|0	miR-411-5p|-1|0	ATAGTAGACCGTATAGCGTACG	isomiR	start-site
MIMAT0001340|hsa-miR-423-3p|0|0	miR-423-3p|0|0	AGCTCGGTCTGAGGCCCCTCAGT	canonical miRNA
MIMAT0001340|hsa-miR-423-3p|0|0(+1U)	miR-423-3p|0|0(+1U)	AGCTCGGTCTGAGGCCCCTCAGTT	isomiR	3' non-templated addition
MIMAT0001340|hsa-miR-423-3p|0|-1	miR-423-3p|0|-1	AGCTCGGTCTGAGGCCCCTCAG	isomiR	end-site
MIMAT0001340|hsa-miR-423-3p|-1|0	miR-423-3p|-1|0	AAGCTCGGTCTGAGGCCCCTCAGT	isomiR	start-site
MIMAT0004748|hsa-miR-423-5p|0|+1	miR-423-5p|0|+1	TGAGGGGCAGAGAGCGAGACTTTT	isomiR	end-site
MIMAT0004748|hsa-miR-423-5p|0|0	miR-423-5p|0|0	TGAGGGGCAGAGAGCGAGACTTT	canonical miRNA
MIMAT0004748|hsa-miR-423-5p|0|-1	miR-423-5p|0|-1	TGAGGGGCAGAGAGCGAGACTT	isomiR	end-site
MIMAT0004748|hsa-miR-423-5p|0|-2	miR-423-5p|0|-2	TGAGGGGCAGAGAGCGAGACT	isomiR	end-site
MIMAT0003393|hsa-miR-425-5p|0|-1	miR-425-5p|0|-1	AATGACACGATCACTCCCGTTG	isomiR (orphan)	end-site
MIMAT0001536|hsa-miR-429|0|-1	miR-429|0|-1	TAATACTGTCTGGTAAAACCG	isomiR (orphan)	end-site
MIMAT0001631|hsa-miR-451a|0|0	miR-451a|0|0	AAACCGTTACCATTACTGAGTT	canonical miRNA
MIMAT0001631|hsa-miR-451a|0|-1	miR-451a|0|-1	AAACCGTTACCATTACTGAGT	isomiR	end-site
MIMAT0003150|hsa-miR-455-5p|0|0	miR-455-5p|0|0	TATGTGCCTTTGGACTACATCG	canonical miRNA (without isomiRs)
MIMAT0002174|hsa-miR-484|0|0	miR-484|0|0	TCAGGCTCAGTCCCCTCCCGAT	canonical miRNA (without isomiRs)
MIMAT0002177|hsa-miR-486-5p|0|0	miR-486-5p|0|0	TCCTGTACTGAGCTGCCCCGAG	canonical miRNA
MIMAT0002177|hsa-miR-486-5p|0|0(+1U)	miR-486-5p|0|0(+1U)	TCCTGTACTGAGCTGCCCCGAGT	isomiR	3' non-templated addition
MIMAT0002177|hsa-miR-486-5p|0|-1	miR-486-5p|0|-1	TCCTGTACTGAGCTGCCCCGA	isomiR	end-site
MIMAT0002177|hsa-miR-486-5p|0|-2	miR-486-5p|0|-2	TCCTGTACTGAGCTGCCCCG	isomiR	end-site
MIMAT0002820|hsa-miR-497-5p|0|+1	miR-497-5p|0|+1	CAGCAGCACACTGTGGTTTGTA	isomiR	end-site
MIMAT0002820|hsa-miR-497-5p|0|0	miR-497-5p|0|0	CAGCAGCACACTGTGGTTTGT	canonical miRNA
MIMAT0002871|hsa-miR-500a-3p|0|+1	miR-500a-3p|0|+1	ATGCACCTGGGCAAGGATTCTGA	isomiR (orphan)	end-site
MIMAT0004774|hsa-miR-501-3p|0|0	miR-501-3p|0|0	AATGCACCCGGGCAAGGATTCT	canonical miRNA (without isomiRs)
MIMAT0002878|hsa-miR-506-3p|-1|0	miR-506-3p|-1|0	GTAAGGCACCCTTCTGAGTAGA	isomiR (orphan)	start-site
MIMAT0002880|hsa-miR-508-3p|+2|0	miR-508-3p|+2|0	ATTGTAGCCTTTTGGAGTAGA	isomiR	start-site
MIMAT0002880|hsa-miR-508-3p|0|0	miR-508-3p|0|0	TGATTGTAGCCTTTTGGAGTAGA	canonical miRNA
MIMAT0002880|hsa-miR-508-3p|0|-1	miR-508-3p|0|-1	TGATTGTAGCCTTTTGGAGTAG	isomiR	end-site
MIMAT0004975|hsa-miR-509-3-5p|0|0	miR-509-3-5p|0|0	TACTGCAGACGTGGCAATCATG	canonical miRNA (without isomiRs)
MIMAT0002881|hsa-miR-509-3p|0|+1	miR-509-3p|0|+1	TGATTGGTACGTCTGTGGGTAGA	isomiR	end-site
MIMAT0002881|hsa-miR-509-3p|0|+1(+1U)	miR-509-3p|0|+1(+1U)	TGATTGGTACGTCTGTGGGTAGAT	isomiR	mixed: end-site + 3’ non-templated addition
MIMAT0002881|hsa-miR-509-3p|0|0	miR-509-3p|0|0	TGATTGGTACGTCTGTGGGTAG	canonical miRNA
MIMAT0002881|hsa-miR-509-3p|0|0(+1U)	miR-509-3p|0|0(+1U)	TGATTGGTACGTCTGTGGGTAGT	isomiR	3' non-templated addition
MIMAT0005789|hsa-miR-513c-5p|0|0	miR-513c-5p|0|0	TTCTCAAGGAGGTGTCGTTTAT	canonical miRNA (without isomiRs)
MIMAT0002883|hsa-miR-514a-3p|0|0	miR-514a-3p|0|0	ATTGACACTTCTGTGAGTAGA	canonical miRNA (without isomiRs)
MIMAT0002888|hsa-miR-532-5p|0|0	miR-532-5p|0|0	CATGCCTTGAGTGTAGGACCGT	canonical miRNA (without isomiRs)
MIMAT0003239|hsa-miR-574-3p|0|0	miR-574-3p|0|0	CACGCTCATGCACACACCCACA	canonical miRNA (without isomiRs)
MIMAT0003338|hsa-miR-660-5p|0|+1	miR-660-5p|0|+1	TACCCATTGCATATCGGAGTTGT	isomiR	end-site
MIMAT0003338|hsa-miR-660-5p|0|0	miR-660-5p|0|0	TACCCATTGCATATCGGAGTTG	canonical miRNA
MIMAT0004945|hsa-miR-744-5p|0|0	miR-744-5p|0|0	TGCGGGGCTAGGGCTAACAGCA	canonical miRNA
MIMAT0004945|hsa-miR-744-5p|0|-1	miR-744-5p|0|-1	TGCGGGGCTAGGGCTAACAGC	isomiR	end-site
MIMAT0003886|hsa-miR-769-5p|0|0	miR-769-5p|0|0	TGAGACCTCTGGGTTCTGAGCT	canonical miRNA (without isomiRs)
MIMAT0000092|hsa-miR-92a-3p|+1|0	miR-92a-3p|+1|0	ATTGCACTTGTCCCGGCCTGT	isomIR	start-site
MIMAT0000092_1|hsa-miR-92a-3p|0|+1	miR-92a-3p|0|+1	TATTGCACTTGTCCCGGCCTGTG	isomiR	3' non-templated addition
MIMAT0000092|hsa-miR-92a-3p|0|+1	miR-92a-3p|0|+1	TATTGCACTTGTCCCGGCCTGTT	isomiR	end-site
MIMAT0000092|hsa-miR-92a-3p|0|+1(+1U)	miR-92a-3p|0|+1(+1U)	TATTGCACTTGTCCCGGCCTGTTT	isomiR	mixed: end-site + 3’ non-templated addition
MIMAT0000092|hsa-miR-92a-3p|0|+1(+2U)	miR-92a-3p|0|+1(+2U)	TATTGCACTTGTCCCGGCCTGTTTT	isomiR	mixed: end-site + 3’ non-templated addition
MIMAT0000092|hsa-miR-92a-3p|0|0	miR-92a-3p|0|0	TATTGCACTTGTCCCGGCCTGT	canonical miRNA
MIMAT0000092|hsa-miR-92a-3p|0|-1	miR-92a-3p|0|-1	TATTGCACTTGTCCCGGCCTG	isomiR	end-site
MIMAT0000092|hsa-miR-92a-3p|0|-3	miR-92a-3p|0|-3	TATTGCACTTGTCCCGGCC	isomiR	end-site
MIMAT0003218|hsa-miR-92b-3p|0|0	miR-92b-3p|0|0	TATTGCACTCGTCCCGGCCTCC	canonical miRNA
MIMAT0003218|hsa-miR-92b-3p|0|0(+1U)	miR-92b-3p|0|0(+1U)	TATTGCACTCGTCCCGGCCTCCT	isomiR	3' non-templated addition
MIMAT0003218|hsa-miR-92b-3p|0|0(+2U)	miR-92b-3p|0|0(+2U)	TATTGCACTCGTCCCGGCCTCCTT	isomiR	3' non-templated addition
MIMAT0003218|hsa-miR-92b-3p|0|-1	miR-92b-3p|0|-1	TATTGCACTCGTCCCGGCCTC	isomiR	end-site
MIMAT0003218|hsa-miR-92b-3p|0|-1(+1U)	miR-92b-3p|0|-1(+1U)	TATTGCACTCGTCCCGGCCTCT	isomiR	mixed: end-site + 3’ non-templated addition
MIMAT0003218|hsa-miR-92b-3p|0|-2	miR-92b-3p|0|-2	TATTGCACTCGTCCCGGCCT	isomiR	end-site
MIMAT0000093|hsa-miR-93-5p|0|+1	miR-93-5p|0|+1	CAAAGTGCTGTTCGTGCAGGTAGT	isomiR	end-site
MIMAT0000093|hsa-miR-93-5p|0|0	miR-93-5p|0|0	CAAAGTGCTGTTCGTGCAGGTAG	canonical miRNA
MIMAT0000093|hsa-miR-93-5p|0|-1	miR-93-5p|0|-1	CAAAGTGCTGTTCGTGCAGGTA	isomiR	end-site
MIMAT0000093|hsa-miR-93-5p|0|-2	miR-93-5p|0|-2	CAAAGTGCTGTTCGTGCAGGT	isomiR	end-site
MIMAT0000096|hsa-miR-98-5p|0|0	miR-98-5p|0|0	TGAGGTAGTAAGTTGTATTGTT	canonical miRNA (without isomiRs)
MIMAT0000097|hsa-miR-99a-5p|0|0	miR-99a-5p|0|0	AACCCGTAGATCCGATCTTGTG	canonical miRNA
MIMAT0000097|hsa-miR-99a-5p|0|-1	miR-99a-5p|0|-1	AACCCGTAGATCCGATCTTGT	isomiR	end-site
MIMAT0000097|hsa-miR-99a-5p|0|-2	miR-99a-5p|0|-2	AACCCGTAGATCCGATCTTG	isomiR	end-site
MIMAT0000689|hsa-miR-99b-5p|0|0	miR-99b-5p|0|0	CACCCGTAGAACCGACCTTGCG	canonical miRNA
MIMAT0000689|hsa-miR-99b-5p|0|0(+1U)	miR-99b-5p|0|0(+1U)	CACCCGTAGAACCGACCTTGCGT	isomiR	3' non-templated addition
MIMAT0000689|hsa-miR-99b-5p|0|-1	miR-99b-5p|0|-1	CACCCGTAGAACCGACCTTGC	isomiR	end-site
MIMAT0000689|hsa-miR-99b-5p|0|-2	miR-99b-5p|0|-2	CACCCGTAGAACCGACCTTG	isomiR	end-site
