# Supplementary material for: MicroRNA Isoforms Contribution to Melanoma Pathogenesis
Source: Noncoding RNA. 2021 Sep 27;7(4):63. doi: 10.3390/ncrna7040063 (PMC8544706; doi:10.3390/ncrna7040063)
Supplement: Supplementary file 1 [file ncrna-07-00063-s001.zip › Supplementary Table 2.xlsx]

## Sheet: Sheet1
Table S2: List of isomiRs that are most expressed in 20 early-stage melanoma samples.
IsomiR name	isomiR group	isomiR expression in melanoma (average, n=20)
hsa-miR-10b-5p|0|-1	end-site	2368.09
hsa-miR-205-5p|0|+1	end-site	1221.77
hsa-miR-27b-3p|0|-1	end-site	845.189
hsa-miR-125a-5p|0|-2	end-site	623.956
hsa-miR-10a-5p|0|-1	end-site	594.227
hsa-miR-181a-5p|0|-1	end-site	546.384
hsa-miR-143-3p|0|0(+1U)	3’ non-templated addition	509.637
hsa-miR-30d-5p|0|+2	end-site	462.003
hsa-miR-143-3p|0|-1	end-site	382.902
hsa-let-7a-5p|0|-1	end-site	321.813
hsa-miR-21-5p|0|+1	end-site	317.094
hsa-miR-21-5p|0|+2	end-site	307.926
hsa-miR-26a-5p|0|0(+1U)	3’ non-templated addition	273.999
hsa-miR-203a-3p|+1|0(+1U)	mixed (end-site, 3’ non-templated addition)	268.821
hsa-miR-199a-3p|0|-1	end-site	258.776
hsa-miR-30a-5p|0|+2	end-site	234.852
hsa-let-7f-5p|0|-1	end-site	227.745
hsa-miR-143-3p|0|+1	end-site	207.489
hsa-miR-10b-5p|0|-2	end-site	203.711
hsa-miR-92a-3p|0|+1	end-site	197.185
hsa-miR-203a-3p|0|+1	end-site	189.295
hsa-miR-222-3p|0|+3	end-site	170.562
hsa-miR-26b-5p|0|+1	end-site	165.472
hsa-miR-26a-5p|0|-1	end-site	162.952
hsa-miR-30c-5p|0|+1	end-site	153.333
hsa-miR-10b-5p|+1|0	start-site	149.839
hsa-miR-148a-3p|0|+1	end-site	149.034
hsa-miR-205-5p|0|+1(+1U)	mixed (end-site, 3’ non-templated addition)	145.767
hsa-miR-27b-3p|0|0(+1U)	3’ non-templated addition	139.057
hsa-miR-30d-5p|0|+1	end-site	135.044
hsa-miR-141-3p|0|-1	end-site	127.957
hsa-miR-92a-3p|0|+1(+1U)	mixed (end-site, 3’ non-templated addition)	125.197
hsa-miR-10b-5p|+1|-1	mixed (start-site, end-site)	118.173
hsa-miR-181a-5p|0|-2	end-site	113.216
hsa-miR-205-5p|0|-1	end-site	112.634
hsa-miR-27a-3p|0|-1	end-site	100.816
hsa-miR-10a-5p|+1|0	start-site	99.48
hsa-miR-21-5p|0|-1	end-site	98.007
hsa-miR-142-5p|-2|-3	mixed (start-site, end-site)	97.823
hsa-miR-203a-3p|0|0(+1U)	3’ non-templated addition	93.523
hsa-miR-509-3p|0|+1	end-site	93.4089
hsa-miR-199a-3p|-1|-1	shifted	87.922
hsa-miR-92a-3p|0|-1	end-site	86.5835
hsa-miR-10b-5p|+1|+1	shifted	84.7295
hsa-miR-181a-5p|0|+1	end-site	81.4825
hsa-miR-100-5p|0|-1	end-site	74.582
hsa-miR-99b-5p|0|-1	end-site	74.0145
hsa-miR-125a-5p|0|-3	end-site	73.559
hsa-miR-203a-3p|+1|+1	shifted	70.651
hsa-miR-186-5p|0|+1	end-site	70.408
hsa-miR-27b-3p|0|+1	end-site	68.941
hsa-miR-203a-3p|0|-2	end-site	64.778
hsa-miR-10a-5p|0|-2	end-site	63.8853
hsa-let-7b-5p|0|+1	end-site	61.8775
hsa-miR-30d-5p|0|-2	end-site	61.5465
hsa-miR-150-5p|0|-1	end-site	61.3916
hsa-miR-10a-5p|+1|-1	mixed (start-site, end-site)	58.1868
hsa-miR-30a-5p|0|-2	end-site	57.722
hsa-miR-22-3p|0|-1	end-site	55.7445
hsa-let-7a-5p|0|+1	end-site	52.9355
hsa-let-7f-5p|0|+1	3’ non-templated addition	50.714
hsa-miR-143-3p|0|0(+2U)	3’ non-templated addition	48.9885
hsa-miR-222-3p|0|+4	end-site	48.3145
hsa-miR-191-5p|0|+1	end-site	47.5465
hsa-miR-101-3p|0|0(+1U)	3’ non-templated addition	47.535
hsa-miR-26a-5p|+3|0	start-site	46.9115
hsa-miR-181b-5p|0|+1	end-site	46.2085
hsa-miR-30a-5p|0|+1	end-site	46.168
hsa-miR-30d-5p|0|-1	end-site	45.813
hsa-miR-203a-3p|+1|0	start-site	44.8765
hsa-miR-200b-3p|0|+1	end-site	44.586
hsa-miR-125b-5p|0|-2	end-site	44.5345
hsa-miR-486-5p|0|-1	end-site	44.1655
hsa-let-7b-5p|0|-1	end-site	43.4135
hsa-miR-125a-5p|0|-1	end-site	41.739
hsa-miR-10b-5p|0|+1	end-site	41.2285
hsa-miR-221-3p|0|-1	end-site	41.1058
hsa-let-7g-5p|0|-1	end-site	41.02
hsa-miR-143-3p|0|-1(+1U)	mixed (end-site, 3’ non-templated addition)	40.04
hsa-miR-182-5p|0|-2	end-site	39.655
hsa-miR-148a-3p|0|+2	end-site	39.502
hsa-miR-101-3p|0|+1	end-site	39.3055
hsa-miR-222-3p|0|+2	end-site	38.258
hsa-miR-146b-5p|0|+1	end-site	37.2863
hsa-miR-181b-5p|0|-1	end-site	35.5275
hsa-miR-191-5p|0|-1	end-site	35.414
hsa-miR-29a-3p|0|-1	end-site	33.981
hsa-miR-146a-5p|0|+1	end-site	33.6869
hsa-miR-200b-3p|0|+1(+1U)	mixed (end-site, 3’ non-templated addition)	33.282
hsa-let-7a-5p|0|-2	end-site	32.6963
hsa-miR-150-5p|0|0(+1U)	3’ non-templated addition	32.1579
hsa-miR-103a-3p|0|-1(+1U)	mixed (end-site, 3’ non-templated addition)	30.446
hsa-miR-423-5p|0|+1	end-site	29.1855
hsa-miR-10a-5p|0|+1	end-site	28.1744
hsa-miR-205-5p|0|-2	end-site	27.594
hsa-miR-221-3p|0|-2	end-site	27.4947
hsa-miR-92b-3p|0|-1	end-site	26.921
hsa-let-7i-5p|0|0(+1U)	3’ non-templated addition	26.86
hsa-miR-182-5p|0|-1	end-site	26.7975
hsa-miR-27b-3p|0|-2	end-site	26.588
hsa-let-7i-5p|0|-1	end-site	26.57
hsa-miR-19b-3p|0|-1	end-site	25.7415
hsa-miR-155-5p|0|-1	end-site	25.7293
hsa-let-7c-5p|0|-1	end-site	25.3616
hsa-miR-27a-3p|0|-2	end-site	25.1645
hsa-miR-199b-5p|0|-1	end-site	24.9775
hsa-miR-744-5p|0|-1	end-site	24.6675
hsa-miR-10b-5p|0|-3	end-site	24.4475
hsa-miR-30a-5p|0|-1	end-site	23.9815
hsa-miR-191-5p|+1|0	start-site	23.922
hsa-miR-146a-5p|0|0(+1U)	3’ non-templated addition	23.6136
hsa-miR-27b-3p|0|-1(+1U)	mixed (end-site, 3’ non-templated addition)	23.4675
hsa-miR-99a-5p|0|-1	end-site	23.2132
hsa-miR-101-3p|-1|-1	shifted	23.0905
hsa-miR-143-3p|0|-2	end-site	22.747
hsa-miR-199a-3p|+1|-1	mixed (start-site, end-site)	21.7365
hsa-miR-182-5p|0|+1	end-site	21.495
hsa-miR-103a-3p|0|-1	end-site	21.16
hsa-miR-148a-3p|0|0(+1U)	3’ non-templated addition	21.078
hsa-miR-25-3p|0|-2	end-site	20.4885
