# Supplementary material for: MicroRNA Isoforms Contribution to Melanoma Pathogenesis
Source: Noncoding RNA. 2021 Sep 27;7(4):63. doi: 10.3390/ncrna7040063 (PMC8544706; doi:10.3390/ncrna7040063)
Supplement: Supplementary file 1 [file ncrna-07-00063-s001.zip › Supplementary table 3.xlsx]

## Sheet: Sheet1
TABLE S3: List of isomiR/canonical miRNA ratios in 20 ealy-stage melanoma samples
Mature microRNA identifier	Mature microRNA name	IsomiR normalized expression (average, n=20)	Canonical miRNA normalized expression (average, n=20)	IsomiR/canonical miRNA Ratio
MIMAT0000062|hsa-let-7a-5p|0|+1	hsa-let-7a-5p|0|+1	52.9355	1146.91	0.046155
MIMAT0000062|hsa-let-7a-5p|0|-1	hsa-let-7a-5p|0|-1	321.813	1146.91	0.280593
MIMAT0000062|hsa-let-7a-5p|0|-2	hsa-let-7a-5p|0|-2	31.0615	1146.91	0.0270829
MIMAT0000062|hsa-let-7a-5p|0|-3	hsa-let-7a-5p|0|-3	2.0635	1146.91	0.00179919
MIMAT0000062|hsa-let-7a-5p|0|-4	hsa-let-7a-5p|0|-4	1.046	1146.91	0.000912019
MIMAT0000063|hsa-let-7b-5p|0|+1	hsa-let-7b-5p|0|+1	61.8775	187.059	0.330791
MIMAT0000063|hsa-let-7b-5p|0|+1(+1U)	hsa-let-7b-5p|0|+1(+1U)	8.251	187.059	0.0441091
MIMAT0000063|hsa-let-7b-5p|0|-1	hsa-let-7b-5p|0|-1	43.4135	187.059	0.232085
MIMAT0000063|hsa-let-7b-5p|0|-2	hsa-let-7b-5p|0|-2	11.4275	187.059	0.0610904
MIMAT0000064|hsa-let-7c-5p|0|+1	hsa-let-7c-5p|0|+1	7.822	162.582	0.0481113
MIMAT0000064|hsa-let-7c-5p|0|-1	hsa-let-7c-5p|0|-1	24.0935	162.582	0.148193
MIMAT0000065|hsa-let-7d-5p|0|-1	hsa-let-7d-5p|0|-1	12.0585	29.348	0.41088
MIMAT0000066|hsa-let-7e-5p|0|-1	hsa-let-7e-5p|0|-1	14.0685	26.0215	0.540649
MIMAT0000067_1|hsa-let-7f-5p|0|+1	hsa-let-7f-5p|0|+1	50.714	943.666	0.0537415
MIMAT0000067|hsa-let-7f-5p|0|+1	hsa-let-7f-5p|0|+1	3.231	943.666	0.00342388
MIMAT0000067|hsa-let-7f-5p|0|-1	hsa-let-7f-5p|0|-1	227.745	943.666	0.24134
MIMAT0000067|hsa-let-7f-5p|0|-2	hsa-let-7f-5p|0|-2	8.259	943.666	0.00875204
MIMAT0000414|hsa-let-7g-5p|0|+1	hsa-let-7g-5p|0|+1	2.491	132.839	0.018752
MIMAT0000414|hsa-let-7g-5p|0|-1	hsa-let-7g-5p|0|-1	38.969	132.839	0.293354
MIMAT0000415|hsa-let-7i-5p|0|0(+1U)	hsa-let-7i-5p|0|0(+1U)	24.174	359.432	0.0672562
MIMAT0000415|hsa-let-7i-5p|0|-1	hsa-let-7i-5p|0|-1	25.2415	359.432	0.0702262
MIMAT0000415|hsa-let-7i-5p|0|-2	hsa-let-7i-5p|0|-2	3.4295	359.432	0.00954146
MIMAT0000415|hsa-let-7i-5p|0|-4	hsa-let-7i-5p|0|-4	1.157	359.432	0.00321897
MIMAT0000098|hsa-miR-100-5p|0|+1	hsa-miR-100-5p|0|+1	6.473	114.918	0.0563271
MIMAT0000098|hsa-miR-100-5p|0|0(+1U)	hsa-miR-100-5p|0|0(+1U)	2.4575	114.918	0.0213848
MIMAT0000098|hsa-miR-100-5p|0|-1	hsa-miR-100-5p|0|-1	74.582	114.918	0.649002
MIMAT0000098|hsa-miR-100-5p|0|-2	hsa-miR-100-5p|0|-2	13.6165	114.918	0.118489
MIMAT0000099|hsa-miR-101-3p|0|+1	hsa-miR-101-3p|0|+1	39.3055	21.4205	1.83495
MIMAT0000099|hsa-miR-101-3p|0|+1(+1U)	hsa-miR-101-3p|0|+1(+1U)	5.414	21.4205	0.252749
MIMAT0000099_1|hsa-miR-101-3p|0|+2	hsa-miR-101-3p|0|+2	4.7765	21.4205	0.222987
MIMAT0000099|hsa-miR-101-3p|0|0(+1U)	hsa-miR-101-3p|0|0(+1U)	47.535	21.4205	2.21914
MIMAT0000099|hsa-miR-101-3p|0|-1	hsa-miR-101-3p|0|-1	10.3535	21.4205	0.483345
MIMAT0000099|hsa-miR-101-3p|0|-2	hsa-miR-101-3p|0|-2	1.0515	21.4205	0.0490885
MIMAT0000099|hsa-miR-101-3p|-1|0	hsa-miR-101-3p|-1|0	18.272	21.4205	0.853015
MIMAT0000099|hsa-miR-101-3p|-1|-1	hsa-miR-101-3p|-1|-1	23.0905	21.4205	1.07796
MIMAT0000099|hsa-miR-101-3p|-1|-2	hsa-miR-101-3p|-1|-2	3.9465	21.4205	0.184239
MIMAT0000099|hsa-miR-101-3p|-1|-3	hsa-miR-101-3p|-1|-3	9.569	21.4205	0.446722
MIMAT0000101|hsa-miR-103a-3p|+3|0	hsa-miR-103a-3p|+3|0	5.19	114.268	0.0454197
MIMAT0000101|hsa-miR-103a-3p|0|0(+1U)	hsa-miR-103a-3p|0|0(+1U)	5.705	114.268	0.0499267
MIMAT0000101|hsa-miR-103a-3p|0|-1	hsa-miR-103a-3p|0|-1	19.044	114.268	0.166662
MIMAT0000101|hsa-miR-103a-3p|0|-1(+1U)	hsa-miR-103a-3p|0|-1(+1U)	30.446	114.268	0.266445
MIMAT0000101|hsa-miR-103a-3p|0|-1(+2U)	hsa-miR-103a-3p|0|-1(+2U)	6.3135	114.268	0.0552519
MIMAT0000253|hsa-miR-10a-5p|+1|+1	hsa-miR-10a-5p|+1|+1	16.787	197.373	0.0850519
MIMAT0000253|hsa-miR-10a-5p|+1|0	hsa-miR-10a-5p|+1|0	99.48	197.373	0.504019
MIMAT0000253|hsa-miR-10a-5p|+1|-1	hsa-miR-10a-5p|+1|-1	55.2775	197.373	0.280065
MIMAT0000253|hsa-miR-10a-5p|+1|-2	hsa-miR-10a-5p|+1|-2	6.148	197.373	0.0311491
MIMAT0000253|hsa-miR-10a-5p|0|+1	hsa-miR-10a-5p|0|+1	25.357	197.373	0.128472
MIMAT0000253|hsa-miR-10a-5p|0|-1	hsa-miR-10a-5p|0|-1	594.227	197.373	3.01067
MIMAT0000253|hsa-miR-10a-5p|0|-2	hsa-miR-10a-5p|0|-2	60.691	197.373	0.307493
MIMAT0000253|hsa-miR-10a-5p|0|-3	hsa-miR-10a-5p|0|-3	5.152	197.373	0.0261028
MIMAT0000254|hsa-miR-10b-5p|+1|+1	hsa-miR-10b-5p|+1|+1	84.7295	365.476	0.231833
MIMAT0000254|hsa-miR-10b-5p|+1|0	hsa-miR-10b-5p|+1|0	149.839	365.476	0.409984
MIMAT0000254|hsa-miR-10b-5p|+1|-1	hsa-miR-10b-5p|+1|-1	118.173	365.476	0.323338
MIMAT0000254|hsa-miR-10b-5p|+1|-2	hsa-miR-10b-5p|+1|-2	10.3155	365.476	0.0282248
MIMAT0000254|hsa-miR-10b-5p|0|+1	hsa-miR-10b-5p|0|+1	41.2285	365.476	0.112808
MIMAT0000254|hsa-miR-10b-5p|0|-1	hsa-miR-10b-5p|0|-1	2368.09	365.476	6.47945
MIMAT0000254|hsa-miR-10b-5p|0|-1(+1U)	hsa-miR-10b-5p|0|-1(+1U)	4.8205	365.476	0.0131896
MIMAT0000254|hsa-miR-10b-5p|0|-2	hsa-miR-10b-5p|0|-2	203.711	365.476	0.557385
MIMAT0000254|hsa-miR-10b-5p|0|-3	hsa-miR-10b-5p|0|-3	24.4475	365.476	0.0668921
MIMAT0000254|hsa-miR-10b-5p|0|-4	hsa-miR-10b-5p|0|-4	3.9815	365.476	0.010894
MIMAT0000443|hsa-miR-125a-5p|0|-1	hsa-miR-125a-5p|0|-1	41.739	60.2915	0.692287
MIMAT0000443|hsa-miR-125a-5p|0|-1(+1U)	hsa-miR-125a-5p|0|-1(+1U)	13.6625	60.2915	0.226607
MIMAT0000443|hsa-miR-125a-5p|0|-2	hsa-miR-125a-5p|0|-2	623.956	60.2915	10.349
MIMAT0000443|hsa-miR-125a-5p|0|-2(+1U)	hsa-miR-125a-5p|0|-2(+1U)	3.0145	60.2915	0.0499988
MIMAT0000443|hsa-miR-125a-5p|0|-3	hsa-miR-125a-5p|0|-3	73.559	60.2915	1.22006
MIMAT0000443|hsa-miR-125a-5p|0|-4	hsa-miR-125a-5p|0|-4	4.337	60.2915	0.0719339
MIMAT0000423|hsa-miR-125b-5p|0|+1	hsa-miR-125b-5p|0|+1	0.923	97.993	0.00941904
MIMAT0000423|hsa-miR-125b-5p|0|-1	hsa-miR-125b-5p|0|-1	12.32	97.993	0.125723
MIMAT0000423|hsa-miR-125b-5p|0|-1(+1U)	hsa-miR-125b-5p|0|-1(+1U)	1.4495	97.993	0.0147919
MIMAT0000423|hsa-miR-125b-5p|0|-2	hsa-miR-125b-5p|0|-2	44.5345	97.993	0.454466
MIMAT0000423|hsa-miR-125b-5p|0|-3	hsa-miR-125b-5p|0|-3	0.931	97.993	0.00950068
MIMAT0000445|hsa-miR-126-3p|+1|0	hsa-miR-126-3p|+1|0	9.0245	31.057	0.290579
MIMAT0000445|hsa-miR-126-3p|+1|0(+1U)	hsa-miR-126-3p|+1|0(+1U)	2.6885	31.057	0.0865666
MIMAT0000445|hsa-miR-126-3p|0|-1	hsa-miR-126-3p|0|-1	2.4665	31.057	0.0794185
MIMAT0000445|hsa-miR-126-3p|0|-2	hsa-miR-126-3p|0|-2	4.6565	31.057	0.149934
MIMAT0000444|hsa-miR-126-5p|0|0(+1U)	hsa-miR-126-5p|0|0(+1U)	2.3785	233.562	0.0101836
MIMAT0000444|hsa-miR-126-5p|0|-2	hsa-miR-126-5p|0|-2	0.5175	233.562	0.00221569
MIMAT0000425|hsa-miR-130a-3p|0|+1	hsa-miR-130a-3p|0|+1	5.7345	6.9715	0.822563
MIMAT0000425|hsa-miR-130a-3p|0|-1	hsa-miR-130a-3p|0|-1	9.8245	6.9715	1.40924
MIMAT0000425|hsa-miR-130a-3p|0|-2	hsa-miR-130a-3p|0|-2	18.4455	6.9715	2.64584
MIMAT0000432|hsa-miR-141-3p|0|+1	hsa-miR-141-3p|0|+1	15.063	4.2635	3.53301
MIMAT0000432|hsa-miR-141-3p|0|+2	hsa-miR-141-3p|0|+2	1.6855	4.2635	0.395332
MIMAT0000432|hsa-miR-141-3p|0|-1	hsa-miR-141-3p|0|-1	127.957	4.2635	30.0121
MIMAT0000433|hsa-miR-142-5p|0|+1	hsa-miR-142-5p|0|+1	1.089	76.356	0.0142621
MIMAT0000433|hsa-miR-142-5p|0|-1	hsa-miR-142-5p|0|-1	2.3	76.356	0.0301221
MIMAT0000433|hsa-miR-142-5p|0|-3	hsa-miR-142-5p|0|-3	2.366	76.356	0.0309864
MIMAT0000433|hsa-miR-142-5p|-2|-1	hsa-miR-142-5p|-2|-1	11.311	76.356	0.148135
MIMAT0000433|hsa-miR-142-5p|-2|-2	hsa-miR-142-5p|-2|-2	6.075	76.356	0.0795615
MIMAT0000433|hsa-miR-142-5p|-2|-3	hsa-miR-142-5p|-2|-3	97.823	76.356	1.28114
MIMAT0000435|hsa-miR-143-3p|0|+1	hsa-miR-143-3p|0|+1	207.489	652.247	0.318114
MIMAT0000435|hsa-miR-143-3p|0|+1(+1U)	hsa-miR-143-3p|0|+1(+1U)	4.016	652.247	0.00615718
MIMAT0000435|hsa-miR-143-3p|0|0(+1U)	hsa-miR-143-3p|0|0(+1U)	509.637	652.247	0.781355
MIMAT0000435|hsa-miR-143-3p|0|0(+2U)	hsa-miR-143-3p|0|0(+2U)	48.9885	652.247	0.0751073
MIMAT0000435|hsa-miR-143-3p|0|-1	hsa-miR-143-3p|0|-1	382.902	652.247	0.587051
MIMAT0000435|hsa-miR-143-3p|0|-1(+1U)	hsa-miR-143-3p|0|-1(+1U)	40.04	652.247	0.0613878
MIMAT0000435|hsa-miR-143-3p|0|-1(+2U)	hsa-miR-143-3p|0|-1(+2U)	9.203	652.247	0.0141097
MIMAT0000435|hsa-miR-143-3p|0|-1(+3U)	hsa-miR-143-3p|0|-1(+3U)	1.6515	652.247	0.00253202
MIMAT0000435|hsa-miR-143-3p|0|-2	hsa-miR-143-3p|0|-2	22.747	652.247	0.0348748
MIMAT0000435|hsa-miR-143-3p|0|-3	hsa-miR-143-3p|0|-3	7.0645	652.247	0.010831
MIMAT0000435|hsa-miR-143-3p|-1|0	hsa-miR-143-3p|-1|0	4.098	652.247	0.0062829
MIMAT0000435|hsa-miR-143-3p|-1|0(+1U)	hsa-miR-143-3p|-1|0(+1U)	2.0635	652.247	0.00316368
MIMAT0000435|hsa-miR-143-3p|-1|-1	hsa-miR-143-3p|-1|-1	3.2915	652.247	0.0050464
MIMAT0000437|hsa-miR-145-5p|0|-1	hsa-miR-145-5p|0|-1	3.0325	61.6835	0.0491623
MIMAT0000449|hsa-miR-146a-5p|0|+1	hsa-miR-146a-5p|0|+1	26.9495	71.338	0.377772
MIMAT0000449|hsa-miR-146a-5p|0|+2	hsa-miR-146a-5p|0|+2	4.479	71.338	0.0627856
MIMAT0000449|hsa-miR-146a-5p|0|0(+1U)	hsa-miR-146a-5p|0|0(+1U)	12.9875	71.338	0.182056
MIMAT0000449|hsa-miR-146a-5p|0|-1	hsa-miR-146a-5p|0|-1	7.1415	71.338	0.100108
MIMAT0002809|hsa-miR-146b-5p|0|+1	hsa-miR-146b-5p|0|+1	35.422	33.14	1.06886
MIMAT0000243|hsa-miR-148a-3p|0|+1	hsa-miR-148a-3p|0|+1	149.034	501.642	0.297091
MIMAT0000243|hsa-miR-148a-3p|0|+2	hsa-miR-148a-3p|0|+2	39.502	501.642	0.0787454
MIMAT0000243|hsa-miR-148a-3p|0|0(+1U)	hsa-miR-148a-3p|0|0(+1U)	21.078	501.642	0.042018
MIMAT0000243|hsa-miR-148a-3p|0|0(+2U)	hsa-miR-148a-3p|0|0(+2U)	5.483	501.642	0.0109301
MIMAT0000243|hsa-miR-148a-3p|0|-1	hsa-miR-148a-3p|0|-1	8.0495	501.642	0.0160463
MIMAT0000759|hsa-miR-148b-3p|0|0(+1U)	hsa-miR-148b-3p|0|0(+1U)	6.977	2.2845	3.05406
MIMAT0000759|hsa-miR-148b-3p|0|0(+2U)	hsa-miR-148b-3p|0|0(+2U)	11.103	2.2845	4.86014
MIMAT0000450|hsa-miR-149-5p|0|0(+1U)	hsa-miR-149-5p|0|0(+1U)	9.6405	14.003	0.68846
MIMAT0000450|hsa-miR-149-5p|0|-1	hsa-miR-149-5p|0|-1	6.051	14.003	0.432122
MIMAT0000450|hsa-miR-149-5p|0|-2	hsa-miR-149-5p|0|-2	5.458	14.003	0.389774
MIMAT0000450|hsa-miR-149-5p|0|-3	hsa-miR-149-5p|0|-3	3.9555	14.003	0.282475
MIMAT0000451|hsa-miR-150-5p|0|0(+1U)	hsa-miR-150-5p|0|0(+1U)	30.55	244.386	0.125007
MIMAT0000451|hsa-miR-150-5p|0|-1	hsa-miR-150-5p|0|-1	58.322	244.386	0.238647
MIMAT0000451|hsa-miR-150-5p|0|-2	hsa-miR-150-5p|0|-2	13.825	244.386	0.0565702
MIMAT0000646|hsa-miR-155-5p|0|-1	hsa-miR-155-5p|0|-1	19.297	24.0605	0.80202
MIMAT0000068|hsa-miR-15a-5p|0|-1	hsa-miR-15a-5p|0|-1	10.2565	2.1215	4.83455
MIMAT0000069|hsa-miR-16-5p|0|+1	hsa-miR-16-5p|0|+1	5.4755	322.692	0.0169682
MIMAT0000069|hsa-miR-16-5p|0|-1	hsa-miR-16-5p|0|-1	12.8335	322.692	0.0397702
MIMAT0004558|hsa-miR-181a-2-3p|0|-1	hsa-miR-181a-2-3p|0|-1	0.579	25.6045	0.0226132
MIMAT0000256|hsa-miR-181a-5p|0|+1	hsa-miR-181a-5p|0|+1	81.4825	1228.14	0.0663463
MIMAT0000256|hsa-miR-181a-5p|0|+2	hsa-miR-181a-5p|0|+2	12.7665	1228.14	0.010395
MIMAT0000256|hsa-miR-181a-5p|0|-1	hsa-miR-181a-5p|0|-1	546.384	1228.14	0.444887
MIMAT0000256|hsa-miR-181a-5p|0|-2	hsa-miR-181a-5p|0|-2	113.216	1228.14	0.092185
MIMAT0000256|hsa-miR-181a-5p|0|-2(+1U)	hsa-miR-181a-5p|0|-2(+1U)	3.1905	1228.14	0.00259783
MIMAT0000256|hsa-miR-181a-5p|0|-3	hsa-miR-181a-5p|0|-3	13.017	1228.14	0.010599
MIMAT0000256|hsa-miR-181a-5p|0|-3(+1U)	hsa-miR-181a-5p|0|-3(+1U)	9.474	1228.14	0.00771411
MIMAT0000256|hsa-miR-181a-5p|0|-4	hsa-miR-181a-5p|0|-4	6.371	1228.14	0.00518752
MIMAT0000257|hsa-miR-181b-5p|0|+1	hsa-miR-181b-5p|0|+1	46.2085	85.9315	0.537736
MIMAT0000257_1|hsa-miR-181b-5p|0|+2	hsa-miR-181b-5p|0|+2	2.644	85.9315	0.0307687
MIMAT0000257|hsa-miR-181b-5p|0|-1	hsa-miR-181b-5p|0|-1	35.5275	85.9315	0.41344
MIMAT0000258|hsa-miR-181c-5p|0|+1	hsa-miR-181c-5p|0|+1	13.8125	17.9225	0.770679
MIMAT0000258|hsa-miR-181c-5p|0|-1	hsa-miR-181c-5p|0|-1	2.576	17.9225	0.14373
MIMAT0000259|hsa-miR-182-5p|0|+1	hsa-miR-182-5p|0|+1	19.3455	82.3485	0.234922
MIMAT0000259|hsa-miR-182-5p|0|+1(+1U)	hsa-miR-182-5p|0|+1(+1U)	3.176	82.3485	0.0385678
MIMAT0000259|hsa-miR-182-5p|0|+2	hsa-miR-182-5p|0|+2	15.4265	82.3485	0.187332
MIMAT0000259|hsa-miR-182-5p|0|-1	hsa-miR-182-5p|0|-1	26.7975	82.3485	0.325416
MIMAT0000259|hsa-miR-182-5p|0|-2	hsa-miR-182-5p|0|-2	39.655	82.3485	0.481551
MIMAT0000259|hsa-miR-182-5p|0|-3	hsa-miR-182-5p|0|-3	8.9825	82.3485	0.109079
MIMAT0000261|hsa-miR-183-5p|0|+1	hsa-miR-183-5p|0|+1	3.041	3.244	0.937423
MIMAT0000456|hsa-miR-186-5p|0|+1	hsa-miR-186-5p|0|+1	70.408	124.743	0.564424
MIMAT0000456|hsa-miR-186-5p|0|-1	hsa-miR-186-5p|0|-1	17.2565	124.743	0.138336
MIMAT0000440|hsa-miR-191-5p|+1|0	hsa-miR-191-5p|+1|0	23.922	655.076	0.0365179
MIMAT0000440|hsa-miR-191-5p|0|+1	hsa-miR-191-5p|0|+1	47.5465	655.076	0.0725817
MIMAT0000440|hsa-miR-191-5p|0|-1	hsa-miR-191-5p|0|-1	35.414	655.076	0.0540609
MIMAT0000440|hsa-miR-191-5p|0|-1(+1U)	hsa-miR-191-5p|0|-1(+1U)	2.1075	655.076	0.00321718
MIMAT0000440|hsa-miR-191-5p|0|-2	hsa-miR-191-5p|0|-2	4.3665	655.076	0.00666564
MIMAT0000440|hsa-miR-191-5p|0|-3	hsa-miR-191-5p|0|-3	2.007	655.076	0.00306377
MIMAT0002819|hsa-miR-193b-3p|0|+1	hsa-miR-193b-3p|0|+1	1.1725	3.293	0.356058
MIMAT0000461|hsa-miR-195-5p|0|+1	hsa-miR-195-5p|0|+1	15.4245	11.0595	1.39468
MIMAT0000226|hsa-miR-196a-5p|0|+1	hsa-miR-196a-5p|0|+1	14.415	4.351	3.31303
MIMAT0000226|hsa-miR-196a-5p|0|0(+1U)	hsa-miR-196a-5p|0|0(+1U)	3.647	4.351	0.838198
MIMAT0000232|hsa-miR-199a-3p|+1|0	hsa-miR-199a-3p|+1|0	4.315	52.961	0.081475
MIMAT0000232|hsa-miR-199a-3p|+1|-1	hsa-miR-199a-3p|+1|-1	21.7365	52.961	0.410425
MIMAT0000232|hsa-miR-199a-3p|0|0(+1U)	hsa-miR-199a-3p|0|0(+1U)	6.5245	52.961	0.123194
MIMAT0000232|hsa-miR-199a-3p|0|-1	hsa-miR-199a-3p|0|-1	258.776	52.961	4.88615
MIMAT0000232|hsa-miR-199a-3p|0|-1(+1U)	hsa-miR-199a-3p|0|-1(+1U)	6.3425	52.961	0.119758
MIMAT0000232|hsa-miR-199a-3p|0|-2	hsa-miR-199a-3p|0|-2	10.69	52.961	0.201847
MIMAT0000232|hsa-miR-199a-3p|-1|0	hsa-miR-199a-3p|-1|0	2.3325	52.961	0.0440418
MIMAT0000232|hsa-miR-199a-3p|-1|-1	hsa-miR-199a-3p|-1|-1	87.922	52.961	1.66013
MIMAT0000232|hsa-miR-199a-3p|-1|-2	hsa-miR-199a-3p|-1|-2	5.6765	52.961	0.107183
MIMAT0000231|hsa-miR-199a-5p|0|0(+1U)	hsa-miR-199a-5p|0|0(+1U)	5.354	26.061	0.205441
MIMAT0000231|hsa-miR-199a-5p|0|-1	hsa-miR-199a-5p|0|-1	18.472	26.061	0.708799
MIMAT0000231|hsa-miR-199a-5p|0|-1(+1U)	hsa-miR-199a-5p|0|-1(+1U)	8.688	26.061	0.333372
MIMAT0000231|hsa-miR-199a-5p|0|-2	hsa-miR-199a-5p|0|-2	9.77	26.061	0.37489
MIMAT0000263|hsa-miR-199b-5p|0|+1	hsa-miR-199b-5p|0|+1	4.577	103.882	0.0440594
MIMAT0000263|hsa-miR-199b-5p|0|0(+1U)	hsa-miR-199b-5p|0|0(+1U)	6.406	103.882	0.0616658
MIMAT0000263|hsa-miR-199b-5p|0|-1	hsa-miR-199b-5p|0|-1	24.9775	103.882	0.24044
MIMAT0000263|hsa-miR-199b-5p|0|-2	hsa-miR-199b-5p|0|-2	5.9135	103.882	0.0569249
MIMAT0000074|hsa-miR-19b-3p|0|-1	hsa-miR-19b-3p|0|-1	25.7415	4.851	5.30643
MIMAT0000682|hsa-miR-200a-3p|0|+1	hsa-miR-200a-3p|0|+1	2.455	1.4795	1.65934
MIMAT0000682|hsa-miR-200a-3p|0|-1	hsa-miR-200a-3p|0|-1	2.367	1.4795	1.59986
MIMAT0000318|hsa-miR-200b-3p|+1|+1(+1U)	hsa-miR-200b-3p|+1|+1(+1U)	12.8235	4.2915	2.98812
MIMAT0000318|hsa-miR-200b-3p|0|+1	hsa-miR-200b-3p|0|+1	44.586	4.2915	10.3894
MIMAT0000318|hsa-miR-200b-3p|0|+1(+1U)	hsa-miR-200b-3p|0|+1(+1U)	33.282	4.2915	7.75533
MIMAT0000617|hsa-miR-200c-3p|0|-1	hsa-miR-200c-3p|0|-1	2.932	11.649	0.251695
MIMAT0000264|hsa-miR-203a-3p|+1|+1	hsa-miR-203a-3p|+1|+1	70.651	134.906	0.523707
MIMAT0000264|hsa-miR-203a-3p|+1|0	hsa-miR-203a-3p|+1|0	44.8765	134.906	0.332651
MIMAT0000264|hsa-miR-203a-3p|+1|0(+1U)	hsa-miR-203a-3p|+1|0(+1U)	268.821	134.906	1.99266
MIMAT0000264|hsa-miR-203a-3p|+1|0(+2U)	hsa-miR-203a-3p|+1|0(+2U)	3.8565	134.906	0.0285867
MIMAT0000264|hsa-miR-203a-3p|+1|-2	hsa-miR-203a-3p|+1|-2	5.455	134.906	0.0404357
MIMAT0000264|hsa-miR-203a-3p|0|+1	hsa-miR-203a-3p|0|+1	189.295	134.906	1.40317
MIMAT0000264|hsa-miR-203a-3p|0|0(+1U)	hsa-miR-203a-3p|0|0(+1U)	93.523	134.906	0.693248
MIMAT0000264|hsa-miR-203a-3p|0|-1	hsa-miR-203a-3p|0|-1	11.384	134.906	0.084385
MIMAT0000264|hsa-miR-203a-3p|0|-2	hsa-miR-203a-3p|0|-2	64.778	134.906	0.480173
MIMAT0000265|hsa-miR-204-5p|0|+1	hsa-miR-204-5p|0|+1	9.896	2.998	3.30087
MIMAT0000266|hsa-miR-205-5p|0|+1	hsa-miR-205-5p|0|+1	1221.77	1044.6	1.16961
MIMAT0000266|hsa-miR-205-5p|0|+1(+1U)	hsa-miR-205-5p|0|+1(+1U)	145.767	1044.6	0.139544
MIMAT0000266|hsa-miR-205-5p|0|-1	hsa-miR-205-5p|0|-1	112.634	1044.6	0.107826
MIMAT0000266|hsa-miR-205-5p|0|-2	hsa-miR-205-5p|0|-2	27.594	1044.6	0.026416
MIMAT0000266|hsa-miR-205-5p|0|-3	hsa-miR-205-5p|0|-3	4.4455	1044.6	0.00425571
MIMAT0000268|hsa-miR-211-5p|+3|0	hsa-miR-211-5p|+3|0	0.659	193.448	0.0034066
MIMAT0000268|hsa-miR-211-5p|0|+1	hsa-miR-211-5p|0|+1	5.3265	193.448	0.0275345
MIMAT0000268|hsa-miR-211-5p|0|0(+1U)	hsa-miR-211-5p|0|0(+1U)	15.9695	193.448	0.0825519
MIMAT0000268|hsa-miR-211-5p|0|0(+2U)	hsa-miR-211-5p|0|0(+2U)	1.497	193.448	0.00773851
MIMAT0000268|hsa-miR-211-5p|0|-1	hsa-miR-211-5p|0|-1	12.3975	193.448	0.064087
MIMAT0000076|hsa-miR-21-5p|0|+1	hsa-miR-21-5p|0|+1	317.094	516.12	0.61438
MIMAT0000076|hsa-miR-21-5p|0|+2	hsa-miR-21-5p|0|+2	307.926	516.12	0.596616
MIMAT0000076|hsa-miR-21-5p|0|-1	hsa-miR-21-5p|0|-1	98.007	516.12	0.189892
MIMAT0000076|hsa-miR-21-5p|0|-2	hsa-miR-21-5p|0|-2	12.387	516.12	0.0240002
MIMAT0000076|hsa-miR-21-5p|0|-3	hsa-miR-21-5p|0|-3	1.953	516.12	0.003784
MIMAT0000278|hsa-miR-221-3p|0|0(+1U)	hsa-miR-221-3p|0|0(+1U)	3.7875	11.8035	0.320879
MIMAT0000278|hsa-miR-221-3p|0|-1	hsa-miR-221-3p|0|-1	39.0505	11.8035	3.30838
MIMAT0000278|hsa-miR-221-3p|0|-1(+1U)	hsa-miR-221-3p|0|-1(+1U)	6.64	11.8035	0.562545
MIMAT0000278|hsa-miR-221-3p|0|-2	hsa-miR-221-3p|0|-2	26.12	11.8035	2.2129
MIMAT0000278|hsa-miR-221-3p|0|-3	hsa-miR-221-3p|0|-3	9.4865	11.8035	0.803702
MIMAT0000279|hsa-miR-222-3p|0|+1	hsa-miR-222-3p|0|+1	7.7335	3.168	2.44113
MIMAT0000279|hsa-miR-222-3p|0|+2	hsa-miR-222-3p|0|+2	38.258	3.168	12.0764
MIMAT0000279|hsa-miR-222-3p|0|+2(+1U)	hsa-miR-222-3p|0|+2(+1U)	5.265	3.168	1.66193
MIMAT0000279|hsa-miR-222-3p|0|+3	hsa-miR-222-3p|0|+3	170.562	3.168	53.8392
MIMAT0000279|hsa-miR-222-3p|0|+4	hsa-miR-222-3p|0|+4	48.3145	3.168	15.2508
MIMAT0000077|hsa-miR-22-3p|0|-1	hsa-miR-22-3p|0|-1	55.7445	1685.06	0.0330817
MIMAT0000077|hsa-miR-22-3p|0|-2	hsa-miR-22-3p|0|-2	18.0905	1685.06	0.0107358
MIMAT0000077|hsa-miR-22-3p|0|-3	hsa-miR-22-3p|0|-3	13.2735	1685.06	0.00787718
MIMAT0000081|hsa-miR-25-3p|0|-1	hsa-miR-25-3p|0|-1	2.7635	64.673	0.0427304
MIMAT0000081|hsa-miR-25-3p|0|-2	hsa-miR-25-3p|0|-2	20.4885	64.673	0.316801
MIMAT0000082|hsa-miR-26a-5p|+1|0	hsa-miR-26a-5p|+1|0	4.407	2897.8	0.00152081
MIMAT0000082|hsa-miR-26a-5p|+3|0	hsa-miR-26a-5p|+3|0	46.9115	2897.8	0.0161887
MIMAT0000082|hsa-miR-26a-5p|+3|0(+1U)	hsa-miR-26a-5p|+3|0(+1U)	3.198	2897.8	0.0011036
MIMAT0000082|hsa-miR-26a-5p|+3|-1	hsa-miR-26a-5p|+3|-1	0.828	2897.8	0.000285734
MIMAT0000082|hsa-miR-26a-5p|0|+1	hsa-miR-26a-5p|0|+1	14.877	2897.8	0.00513389
MIMAT0000082|hsa-miR-26a-5p|0|0(+1U)	hsa-miR-26a-5p|0|0(+1U)	273.999	2897.8	0.0945541
MIMAT0000082|hsa-miR-26a-5p|0|0(+2U)	hsa-miR-26a-5p|0|0(+2U)	16.7195	2897.8	0.00576972
MIMAT0000082|hsa-miR-26a-5p|0|-1	hsa-miR-26a-5p|0|-1	162.952	2897.8	0.056233
MIMAT0000082|hsa-miR-26a-5p|0|-2	hsa-miR-26a-5p|0|-2	5.499	2897.8	0.00189765
MIMAT0000082|hsa-miR-26a-5p|0|-2(+2U)	hsa-miR-26a-5p|0|-2(+2U)	10.4395	2897.8	0.00360256
MIMAT0000082|hsa-miR-26a-5p|0|-3	hsa-miR-26a-5p|0|-3	14.1205	2897.8	0.00487283
MIMAT0000083|hsa-miR-26b-5p|0|+1	hsa-miR-26b-5p|0|+1	165.472	35.9315	4.60521
MIMAT0000083|hsa-miR-26b-5p|0|+1(+1U)	hsa-miR-26b-5p|0|+1(+1U)	13.16	35.9315	0.366252
MIMAT0000083|hsa-miR-26b-5p|0|-1	hsa-miR-26b-5p|0|-1	2.1565	35.9315	0.060017
MIMAT0000084|hsa-miR-27a-3p|0|0(+1U)	hsa-miR-27a-3p|0|0(+1U)	15.3505	24.7395	0.620485
MIMAT0000084|hsa-miR-27a-3p|0|-1	hsa-miR-27a-3p|0|-1	100.816	24.7395	4.07508
MIMAT0000084|hsa-miR-27a-3p|0|-1(+1U)	hsa-miR-27a-3p|0|-1(+1U)	4.1415	24.7395	0.167404
MIMAT0000084|hsa-miR-27a-3p|0|-2	hsa-miR-27a-3p|0|-2	25.1645	24.7395	1.01718
MIMAT0000084|hsa-miR-27a-3p|0|-3	hsa-miR-27a-3p|0|-3	13.233	24.7395	0.534894
MIMAT0000419|hsa-miR-27b-3p|+3|0	hsa-miR-27b-3p|+3|0	4.93	368.309	0.0133855
MIMAT0000419|hsa-miR-27b-3p|0|+1	hsa-miR-27b-3p|0|+1	68.941	368.309	0.187183
MIMAT0000419|hsa-miR-27b-3p|0|+1(+1U)	hsa-miR-27b-3p|0|+1(+1U)	14.2925	368.309	0.0388057
MIMAT0000419|hsa-miR-27b-3p|0|0(+1U)	hsa-miR-27b-3p|0|0(+1U)	139.057	368.309	0.377555
MIMAT0000419|hsa-miR-27b-3p|0|0(+2U)	hsa-miR-27b-3p|0|0(+2U)	3.0465	368.309	0.00827159
MIMAT0000419|hsa-miR-27b-3p|0|-1	hsa-miR-27b-3p|0|-1	845.189	368.309	2.29478
MIMAT0000419|hsa-miR-27b-3p|0|-1(+1U)	hsa-miR-27b-3p|0|-1(+1U)	23.4675	368.309	0.0637169
MIMAT0000419|hsa-miR-27b-3p|0|-2	hsa-miR-27b-3p|0|-2	26.588	368.309	0.0721894
MIMAT0000419|hsa-miR-27b-3p|-1|-1	hsa-miR-27b-3p|-1|-1	1.475	368.309	0.00400479
MIMAT0004502|hsa-miR-28-3p|0|0(+1U)	hsa-miR-28-3p|0|0(+1U)	11.5465	127.795	0.0903517
MIMAT0004502|hsa-miR-28-3p|0|-1	hsa-miR-28-3p|0|-1	10.9645	127.795	0.0857976
MIMAT0000085|hsa-miR-28-5p|0|-1	hsa-miR-28-5p|0|-1	1.2495	7.7995	0.160203
MIMAT0000086|hsa-miR-29a-3p|0|+1	hsa-miR-29a-3p|0|+1	0.362	21.582	0.0167732
MIMAT0000086|hsa-miR-29a-3p|0|-1	hsa-miR-29a-3p|0|-1	33.981	21.582	1.57451
MIMAT0000086|hsa-miR-29a-3p|0|-2	hsa-miR-29a-3p|0|-2	7.793	21.582	0.361088
MIMAT0000086|hsa-miR-29a-3p|-1|-1	hsa-miR-29a-3p|-1|-1	12.2145	21.582	0.565958
MIMAT0000681|hsa-miR-29c-3p|0|-1	hsa-miR-29c-3p|0|-1	6.9425	6.263	1.10849
MIMAT0000087|hsa-miR-30a-5p|+1|+2	hsa-miR-30a-5p|+1|+2	4.374	10.4145	0.419991
MIMAT0000087|hsa-miR-30a-5p|0|+1	hsa-miR-30a-5p|0|+1	46.168	10.4145	4.43305
MIMAT0000087|hsa-miR-30a-5p|0|+2	hsa-miR-30a-5p|0|+2	234.852	10.4145	22.5505
MIMAT0000087|hsa-miR-30a-5p|0|0(+1U)	hsa-miR-30a-5p|0|0(+1U)	3.323	10.4145	0.319074
MIMAT0000087|hsa-miR-30a-5p|0|-1	hsa-miR-30a-5p|0|-1	23.9815	10.4145	2.3027
MIMAT0000087|hsa-miR-30a-5p|0|-2	hsa-miR-30a-5p|0|-2	57.722	10.4145	5.54246
MIMAT0000420|hsa-miR-30b-5p|0|-1	hsa-miR-30b-5p|0|-1	0.7395	95.5845	0.00773661
MIMAT0000244|hsa-miR-30c-5p|0|+1	hsa-miR-30c-5p|0|+1	153.333	15.6285	9.81108
MIMAT0000245|hsa-miR-30d-5p|0|+1	hsa-miR-30d-5p|0|+1	135.044	39.7	3.40162
MIMAT0000245|hsa-miR-30d-5p|0|+2	hsa-miR-30d-5p|0|+2	462.003	39.7	11.6374
MIMAT0000245|hsa-miR-30d-5p|0|+2(+1U)	hsa-miR-30d-5p|0|+2(+1U)	9.351	39.7	0.235542
MIMAT0000245|hsa-miR-30d-5p|0|0(+1U)	hsa-miR-30d-5p|0|0(+1U)	13.284	39.7	0.33461
MIMAT0000245|hsa-miR-30d-5p|0|-1	hsa-miR-30d-5p|0|-1	45.813	39.7	1.15398
MIMAT0000245|hsa-miR-30d-5p|0|-2	hsa-miR-30d-5p|0|-2	61.5465	39.7	1.55029
MIMAT0000510|hsa-miR-320a-3p|0|+1	hsa-miR-320a-3p|0|+1	14.6445	51.948	0.281907
MIMAT0000510|hsa-miR-320a-3p|0|+1(+1U)	hsa-miR-320a-3p|0|+1(+1U)	9.4175	51.948	0.181287
MIMAT0000510|hsa-miR-320a-3p|0|+2	hsa-miR-320a-3p|0|+2	5.4515	51.948	0.104941
MIMAT0000510|hsa-miR-320a-3p|0|0(+1U)	hsa-miR-320a-3p|0|0(+1U)	17.5735	51.948	0.33829
MIMAT0000510|hsa-miR-320a-3p|0|0(+2U)	hsa-miR-320a-3p|0|0(+2U)	8.848	51.948	0.170324
MIMAT0000510|hsa-miR-320a-3p|0|-1	hsa-miR-320a-3p|0|-1	9.019	51.948	0.173616
MIMAT0000510|hsa-miR-320a-3p|0|-1(+1U)	hsa-miR-320a-3p|0|-1(+1U)	3.91	51.948	0.0752676
MIMAT0000752|hsa-miR-328-3p|0|0(+1U)	hsa-miR-328-3p|0|0(+1U)	3.0085	3.2195	0.934462
MIMAT0004692|hsa-miR-340-5p|0|-1	hsa-miR-340-5p|0|-1	2.4095	13.1875	0.182711
MIMAT0000753|hsa-miR-342-3p|0|+1	hsa-miR-342-3p|0|+1	9.8215	19.8525	0.494724
MIMAT0000753|hsa-miR-342-3p|0|-1	hsa-miR-342-3p|0|-1	4.8895	19.8525	0.246291
MIMAT0001639|hsa-miR-409-3p|-1|0	hsa-miR-409-3p|-1|0	4.1175	5.1795	0.794961
MIMAT0003329|hsa-miR-411-5p|-1|0	hsa-miR-411-5p|-1|0	6.6965	5.766	1.16138
MIMAT0001340|hsa-miR-423-3p|0|0(+1U)	hsa-miR-423-3p|0|0(+1U)	10.3625	77.2675	0.134112
MIMAT0001340|hsa-miR-423-3p|0|-1	hsa-miR-423-3p|0|-1	3.105	77.2675	0.0401851
MIMAT0001340|hsa-miR-423-3p|-1|0	hsa-miR-423-3p|-1|0	13.9145	77.2675	0.180082
MIMAT0004748|hsa-miR-423-5p|0|+1	hsa-miR-423-5p|0|+1	29.1855	113.633	0.25684
MIMAT0004748|hsa-miR-423-5p|0|-1	hsa-miR-423-5p|0|-1	15.9515	113.633	0.140377
MIMAT0004748|hsa-miR-423-5p|0|-2	hsa-miR-423-5p|0|-2	16.4715	113.633	0.144953
MIMAT0001631|hsa-miR-451a|0|-1	hsa-miR-451a|0|-1	4.266	2.761	1.54509
MIMAT0002177|hsa-miR-486-5p|0|0(+1U)	hsa-miR-486-5p|0|0(+1U)	11.2295	77.5805	0.144746
MIMAT0002177|hsa-miR-486-5p|0|-1	hsa-miR-486-5p|0|-1	44.1655	77.5805	0.569286
MIMAT0002177|hsa-miR-486-5p|0|-2	hsa-miR-486-5p|0|-2	3.231	77.5805	0.0416471
MIMAT0002820|hsa-miR-497-5p|0|+1	hsa-miR-497-5p|0|+1	8.5	22.193	0.383004
MIMAT0002880|hsa-miR-508-3p|+2|0	hsa-miR-508-3p|+2|0	2.3735	23.525	0.100893
MIMAT0002880|hsa-miR-508-3p|0|-1	hsa-miR-508-3p|0|-1	3.1675	23.525	0.134644
MIMAT0002881|hsa-miR-509-3p|0|+1	hsa-miR-509-3p|0|+1	88.7385	40.265	2.20386
MIMAT0002881|hsa-miR-509-3p|0|+1(+1U)	hsa-miR-509-3p|0|+1(+1U)	1.8	40.265	0.0447038
MIMAT0002881|hsa-miR-509-3p|0|0(+1U)	hsa-miR-509-3p|0|0(+1U)	11.2595	40.265	0.279635
MIMAT0003338|hsa-miR-660-5p|0|+1	hsa-miR-660-5p|0|+1	6.2115	5.4045	1.14932
MIMAT0004945|hsa-miR-744-5p|0|-1	hsa-miR-744-5p|0|-1	24.6675	9.364	2.63429
MIMAT0000092|hsa-miR-92a-3p|+1|0	hsa-miR-92a-3p|+1|0	14.238	1430.56	0.00995277
MIMAT0000092_1|hsa-miR-92a-3p|0|+1	hsa-miR-92a-3p|0|+1	2.1675	1430.56	0.00151515
MIMAT0000092|hsa-miR-92a-3p|0|+1	hsa-miR-92a-3p|0|+1	197.185	1430.56	0.137838
MIMAT0000092|hsa-miR-92a-3p|0|+1(+1U)	hsa-miR-92a-3p|0|+1(+1U)	125.197	1430.56	0.0875163
MIMAT0000092|hsa-miR-92a-3p|0|+1(+2U)	hsa-miR-92a-3p|0|+1(+2U)	9.998	1430.56	0.00698889
MIMAT0000092|hsa-miR-92a-3p|0|-1	hsa-miR-92a-3p|0|-1	86.5835	1430.56	0.0605244
MIMAT0000092|hsa-miR-92a-3p|0|-3	hsa-miR-92a-3p|0|-3	2.8015	1430.56	0.00195833
MIMAT0003218|hsa-miR-92b-3p|0|0(+1U)	hsa-miR-92b-3p|0|0(+1U)	9.737	80.32	0.121228
MIMAT0003218|hsa-miR-92b-3p|0|0(+2U)	hsa-miR-92b-3p|0|0(+2U)	1.724	80.32	0.0214641
MIMAT0003218|hsa-miR-92b-3p|0|-1	hsa-miR-92b-3p|0|-1	26.921	80.32	0.335172
MIMAT0003218|hsa-miR-92b-3p|0|-1(+1U)	hsa-miR-92b-3p|0|-1(+1U)	12.685	80.32	0.157931
MIMAT0003218|hsa-miR-92b-3p|0|-2	hsa-miR-92b-3p|0|-2	13.177	80.32	0.164056
MIMAT0000093|hsa-miR-93-5p|0|+1	hsa-miR-93-5p|0|+1	3.06	12.869	0.237781
MIMAT0000093|hsa-miR-93-5p|0|-1	hsa-miR-93-5p|0|-1	2.891	12.869	0.224648
MIMAT0000093|hsa-miR-93-5p|0|-2	hsa-miR-93-5p|0|-2	15.673	12.869	1.21789
MIMAT0000097|hsa-miR-99a-5p|0|-1	hsa-miR-99a-5p|0|-1	22.0525	26.771	0.823746
MIMAT0000097|hsa-miR-99a-5p|0|-2	hsa-miR-99a-5p|0|-2	4.9865	26.771	0.186265
MIMAT0000689|hsa-miR-99b-5p|0|0(+1U)	hsa-miR-99b-5p|0|0(+1U)	12.753	120.169	0.106125
MIMAT0000689|hsa-miR-99b-5p|0|-1	hsa-miR-99b-5p|0|-1	74.0145	120.169	0.615918
MIMAT0000689|hsa-miR-99b-5p|0|-2	hsa-miR-99b-5p|0|-2	14.3365	120.169	0.119302
