# Supplementary material for: MicroRNA Isoforms Contribution to Melanoma Pathogenesis
Source: Noncoding RNA. 2021 Sep 27;7(4):63. doi: 10.3390/ncrna7040063 (PMC8544706; doi:10.3390/ncrna7040063)
Supplement: Supplementary file 1 [file ncrna-07-00063-s001.zip › supplementary table 4.xlsx]

## Sheet: Sheet1
Table S4: List of mature microRNAs identified in TCGA SKCM data
Mature microRNA name	Sequence	Type	isomiR group
hsa-let-7a-2-3p|0|0	CTGTACAGCCTCCTAGCTTTCC	canonical miRNA
hsa-let-7a-2-3p|0|-1	CTGTACAGCCTCCTAGCTTTC	isomiR	end-site
hsa-let-7a-2-3p|0|-2	CTGTACAGCCTCCTAGCTTT	isomiR	end-site
hsa-let-7a-3p|+1|+2	TATACAATCTACTGTCTTTCCT	isomiR	mixed: start-site + end-site
hsa-let-7a-3p|0|+1	CTATACAATCTACTGTCTTTCC	isomiR	end-site
hsa-let-7a-3p|0|0	CTATACAATCTACTGTCTTTC	canonical miRNA
hsa-let-7a-3p|0|0(+1U)	CTATACAATCTACTGTCTTTCT	isomiR	3' non-templated addition
hsa-let-7a-3p|0|-1	CTATACAATCTACTGTCTTT	isomiR	end-site
hsa-let-7a-5p|+1|0	GAGGTAGTAGGTTGTATAGTT	isomiR	start-site
hsa-let-7a-5p|+1|-1	GAGGTAGTAGGTTGTATAGT	isomiR	mixed: start-site + end-site
hsa-let-7a-5p|+1|-2	GAGGTAGTAGGTTGTATAG	isomiR	mixed: start-site + end-site
hsa-let-7a-5p|+2|0	AGGTAGTAGGTTGTATAGTT	isomiR	start-site
hsa-let-7a-5p|+2|-1	AGGTAGTAGGTTGTATAGT	isomiR	mixed: start-site + end-site
hsa-let-7a-5p|+3|+1	GGTAGTAGGTTGTATAGTTT	isomiR	mixed: start-site + end-site
hsa-let-7a-5p|+3|0	GGTAGTAGGTTGTATAGTT	isomiR	start-site
hsa-let-7a-5p|+3|-1	GGTAGTAGGTTGTATAGT	isomiR	mixed: start-site + end-site
hsa-let-7a-5p|+4|0	GTAGTAGGTTGTATAGTT	isomiR	start-site
hsa-let-7a-5p|0|+1	TGAGGTAGTAGGTTGTATAGTTT	isomiR	end-site
hsa-let-7a-5p|0|+2	TGAGGTAGTAGGTTGTATAGTTTA	isomiR	3' non-templated addition
hsa-let-7a-5p|0|+2	TGAGGTAGTAGGTTGTATAGTTTG	isomiR	3' non-templated addition
hsa-let-7a-5p|0|+2	TGAGGTAGTAGGTTGTATAGTTTT	isomiR	end-site
hsa-let-7a-5p|0|0	TGAGGTAGTAGGTTGTATAGTT	canonical miRNA
hsa-let-7a-5p|0|-1	TGAGGTAGTAGGTTGTATAGT	isomiR	end-site
hsa-let-7a-5p|0|-2	TGAGGTAGTAGGTTGTATAG	isomiR	end-site
hsa-let-7a-5p|0|-3	TGAGGTAGTAGGTTGTATA	isomiR	end-site
hsa-let-7a-5p|0|-3(+1U)	TGAGGTAGTAGGTTGTATAT	isomiR	mixed: end-site + 3' non-templated addition
hsa-let-7a-5p|0|-3(+2U)	TGAGGTAGTAGGTTGTATATT	isomiR	mixed: end-site + 3' non-templated addition
hsa-let-7a-5p|0|-3(+3U)	TGAGGTAGTAGGTTGTATATTT	isomiR	mixed: end-site + 3' non-templated addition
hsa-let-7a-5p|0|-4	TGAGGTAGTAGGTTGTAT	isomiR	end-site
hsa-let-7a-5p|0|-4(+1U)	TGAGGTAGTAGGTTGTATT	isomiR	mixed: end-site + 3' non-templated addition
hsa-let-7a-5p|0|-4(+2U)	TGAGGTAGTAGGTTGTATTT	isomiR	mixed: end-site + 3' non-templated addition
hsa-let-7a-5p|-1|+1	GTGAGGTAGTAGGTTGTATAGTTT	isomiR	mixed: 5' non-templated addition + end-site
hsa-let-7a-5p|-1|0	GTGAGGTAGTAGGTTGTATAGTT	isomiR	5' non-templated addition
hsa-let-7a-5p|-1|0	TTGAGGTAGTAGGTTGTATAGTT	isomiR	5' non-templated addition
hsa-let-7a-5p|-1|0	ATGAGGTAGTAGGTTGTATAGTT	isomiR	start-site
hsa-let-7a-5p|-1|-1	GTGAGGTAGTAGGTTGTATAGT	isomiR	mixed: 5' non-templated addition + end-site
hsa-let-7a-5p|-1|-1	TTGAGGTAGTAGGTTGTATAGT	isomiR	mixed: 5' non-templated addition + end-site
hsa-let-7a-5p|-1|-1	ATGAGGTAGTAGGTTGTATAGT	isomiR	shifted
hsa-let-7a-5p|-1|-2	GTGAGGTAGTAGGTTGTATAG	isomiR	mixed: 5' non-templated addition + end-site
hsa-let-7a-5p|-1|-2	TTGAGGTAGTAGGTTGTATAG	isomiR	mixed: 5' non-templated addition + end-site
hsa-let-7a-5p|-1|-2	ATGAGGTAGTAGGTTGTATAG	isomiR	mixed: start-site + end-site
hsa-let-7a-5p|-1|-3	GTGAGGTAGTAGGTTGTATA	isomiR	mixed: 5' non-templated addition + end-site
hsa-let-7a-5p|-1|-4	GTGAGGTAGTAGGTTGTAT	isomiR	mixed: 5' non-templated addition + end-site
hsa-let-7b-3p|0|-1	CTATACAACCTACTGCCTTCC	isomiR (orphan)	end-site
hsa-let-7b-3p|0|-1(+1U)	CTATACAACCTACTGCCTTCCT	isomiR (orphan)	mixed: end-site + 3' non-templated addition
hsa-let-7b-3p|0|-1(+2U)	CTATACAACCTACTGCCTTCCTT	isomiR (orphan)	mixed: end-site + 3' non-templated addition
hsa-let-7b-3p|0|-2	CTATACAACCTACTGCCTTC	isomiR (orphan)	end-site
hsa-let-7b-3p|0|-2(+1U)	CTATACAACCTACTGCCTTCT	isomiR (orphan)	mixed: end-site + 3' non-templated addition
hsa-let-7b-3p|0|-2(+2U)	CTATACAACCTACTGCCTTCTT	isomiR (orphan)	mixed: end-site + 3' non-templated addition
hsa-let-7b-5p|+1|+1	GAGGTAGTAGGTTGTGTGGTTT	isomiR	shifted
hsa-let-7b-5p|+1|0	GAGGTAGTAGGTTGTGTGGTT	isomiR	start-site
hsa-let-7b-5p|+1|-1	GAGGTAGTAGGTTGTGTGGT	isomiR	mixed: start-site + end-site
hsa-let-7b-5p|+1|-2	GAGGTAGTAGGTTGTGTGG	isomiR	mixed: start-site + end-site
hsa-let-7b-5p|+3|+1	GGTAGTAGGTTGTGTGGTTT	isomiR	mixed: start-site + end-site
hsa-let-7b-5p|+3|0	GGTAGTAGGTTGTGTGGTT	isomiR	start-site
hsa-let-7b-5p|+3|-1	GGTAGTAGGTTGTGTGGT	isomiR	mixed: start-site + end-site
hsa-let-7b-5p|+4|+1	GTAGTAGGTTGTGTGGTTT	isomiR	mixed: start-site + end-site
hsa-let-7b-5p|+4|0	GTAGTAGGTTGTGTGGTT	isomiR	start-site
hsa-let-7b-5p|0|+1	TGAGGTAGTAGGTTGTGTGGTTT	isomiR	end-site
hsa-let-7b-5p|0|+1(+1U)	TGAGGTAGTAGGTTGTGTGGTTTT	isomiR	mixed: end-site + 3' non-templated addition
hsa-let-7b-5p|0|+1(+2U)	TGAGGTAGTAGGTTGTGTGGTTTTT	isomiR	mixed: end-site + 3' non-templated addition
hsa-let-7b-5p|0|+1(+3U)	TGAGGTAGTAGGTTGTGTGGTTTTTT	isomiR	mixed: end-site + 3' non-templated addition
hsa-let-7b-5p|0|+2	TGAGGTAGTAGGTTGTGTGGTTTC	isomiR	end-site
hsa-let-7b-5p|0|0	TGAGGTAGTAGGTTGTGTGGTT	canonical miRNA
hsa-let-7b-5p|0|-1	TGAGGTAGTAGGTTGTGTGGT	isomiR	end-site
hsa-let-7b-5p|0|-2	TGAGGTAGTAGGTTGTGTGG	isomiR	end-site
hsa-let-7b-5p|0|-3	TGAGGTAGTAGGTTGTGTG	isomiR	end-site
hsa-let-7b-5p|0|-3(+1U)	TGAGGTAGTAGGTTGTGTGT	isomiR	mixed: end-site + 3' non-templated addition
hsa-let-7b-5p|0|-3(+2U)	TGAGGTAGTAGGTTGTGTGTT	isomiR	mixed: end-site + 3' non-templated addition
hsa-let-7b-5p|0|-3(+3U)	TGAGGTAGTAGGTTGTGTGTTT	isomiR	mixed: end-site + 3' non-templated addition
hsa-let-7b-5p|0|-4	TGAGGTAGTAGGTTGTGT	isomiR	end-site
hsa-let-7b-5p|0|-4(+1U)	TGAGGTAGTAGGTTGTGTT	isomiR	mixed: end-site + 3' non-templated addition
hsa-let-7c-3p|0|0	CTGTACAACCTTCTAGCTTTCC	canonical miRNA
hsa-let-7c-3p|0|-1	CTGTACAACCTTCTAGCTTTC	isomiR	end-site
hsa-let-7c-5p|+1|0	GAGGTAGTAGGTTGTATGGTT	isomiR	start-site
hsa-let-7c-5p|0|+1	TGAGGTAGTAGGTTGTATGGTTT	isomiR	end-site
hsa-let-7c-5p|0|+1(+1U)	TGAGGTAGTAGGTTGTATGGTTTT	isomiR	mixed: end-site + 3' non-templated addition
hsa-let-7c-5p|0|+2	TGAGGTAGTAGGTTGTATGGTTTA	isomiR	mixed: end-site + 3' non-templated addition
hsa-let-7c-5p|0|0	TGAGGTAGTAGGTTGTATGGTT	canonical miRNA
hsa-let-7c-5p|0|-1	TGAGGTAGTAGGTTGTATGGT	isomiR	end-site
hsa-let-7c-5p|0|-2	TGAGGTAGTAGGTTGTATGG	isomiR	end-site
hsa-let-7c-5p|0|-3	TGAGGTAGTAGGTTGTATG	isomiR	end-site
hsa-let-7c-5p|0|-3(+1U)	TGAGGTAGTAGGTTGTATGT	isomiR	mixed: end-site + 3' non-templated addition
hsa-let-7c-5p|0|-3(+2U)	TGAGGTAGTAGGTTGTATGTT	isomiR	mixed: end-site + 3' non-templated addition
hsa-let-7c-5p|-1|0	TTGAGGTAGTAGGTTGTATGGTT	isomiR	start-site
hsa-let-7c-5p|-1|-1	TTGAGGTAGTAGGTTGTATGGT	isomiR	shifted
hsa-let-7c-5p|-1|-2	TTGAGGTAGTAGGTTGTATGG	isomiR	mixed: start-site + end-site
hsa-let-7c-5p|-1|-3	TTGAGGTAGTAGGTTGTATG	isomiR	mixed: start-site + end-site
hsa-let-7c-5p|-2|-1	GTTGAGGTAGTAGGTTGTATGGT	isomiR	mixed: start-site + end-site
hsa-let-7c-5p|-2|-2	GTTGAGGTAGTAGGTTGTATGG	isomiR	shifted
hsa-let-7d-3p|+1|0	TATACGACCTGCTGCCTTTCT	isomiR	start-site
hsa-let-7d-3p|+1|-1	TATACGACCTGCTGCCTTTC	isomiR	mixed: start-site + end-site
hsa-let-7d-3p|+1|-2	TATACGACCTGCTGCCTTT	isomiR	mixed: start-site + end-site
hsa-let-7d-3p|0|+1	CTATACGACCTGCTGCCTTTCTT	isomiR	end-site
hsa-let-7d-3p|0|0	CTATACGACCTGCTGCCTTTCT	canonical miRNA
hsa-let-7d-3p|0|-1	CTATACGACCTGCTGCCTTTC	isomiR	end-site
hsa-let-7d-3p|0|-2	CTATACGACCTGCTGCCTTT	isomiR	end-site
hsa-let-7d-3p|0|-2(+1U)	CTATACGACCTGCTGCCTTTT	isomiR	mixed: end-site + 3' non-templated addition
hsa-let-7d-3p|0|-2(+2U)	CTATACGACCTGCTGCCTTTTT	isomiR	mixed: end-site + 3' non-templated addition
hsa-let-7d-3p|0|-3	CTATACGACCTGCTGCCTT	isomiR	end-site
hsa-let-7d-3p|0|-4	CTATACGACCTGCTGCCT	isomiR	end-site
hsa-let-7d-5p|+1|0	GAGGTAGTAGGTTGCATAGTT	isomiR	start-site
hsa-let-7d-5p|+1|-1	GAGGTAGTAGGTTGCATAGT	isomiR	mixed: end-site + 3' non-templated addition
hsa-let-7d-5p|+1|-2	GAGGTAGTAGGTTGCATAG	isomiR	mixed: end-site + 3' non-templated addition
hsa-let-7d-5p|0|+1	AGAGGTAGTAGGTTGCATAGTTT	isomiR	end-site
hsa-let-7d-5p|0|0	AGAGGTAGTAGGTTGCATAGTT	canonical miRNA
hsa-let-7d-5p|0|-1	AGAGGTAGTAGGTTGCATAGT	isomiR	end-site
hsa-let-7d-5p|0|-2	AGAGGTAGTAGGTTGCATAG	isomiR	end-site
hsa-let-7d-5p|0|-3	AGAGGTAGTAGGTTGCATA	isomiR	end-site
hsa-let-7d-5p|0|-4	AGAGGTAGTAGGTTGCAT	isomiR	end-site
hsa-let-7e-3p|0|0	CTATACGGCCTCCTAGCTTTCC	canonical miRNA
hsa-let-7e-3p|0|0(+1U)	CTATACGGCCTCCTAGCTTTCCT	isomiR	3' non-templated addition
hsa-let-7e-3p|0|-1	CTATACGGCCTCCTAGCTTTC	isomiR	end-site
hsa-let-7e-3p|0|-1(+1U)	CTATACGGCCTCCTAGCTTTCT	isomiR	mixed: end-site + 3' non-templated addition
hsa-let-7e-3p|0|-2	CTATACGGCCTCCTAGCTTT	isomiR	end-site
hsa-let-7e-5p|+1|0	GAGGTAGGAGGTTGTATAGTT	isomiR	start-site
hsa-let-7e-5p|0|+1	TGAGGTAGGAGGTTGTATAGTTG	isomiR	end-site
hsa-let-7e-5p|0|+1(+1U)	TGAGGTAGGAGGTTGTATAGTTGT	isomiR	mixed: end-site + 3' non-templated addition
hsa-let-7e-5p|0|+2	TGAGGTAGGAGGTTGTATAGTTGA	isomiR	end-site
hsa-let-7e-5p|0|0	TGAGGTAGGAGGTTGTATAGTT	canonical miRNA
hsa-let-7e-5p|0|0(+1U)	TGAGGTAGGAGGTTGTATAGTTT	isomiR	3' non-templated addition
hsa-let-7e-5p|0|0(+2U)	TGAGGTAGGAGGTTGTATAGTTTT	isomiR	3' non-templated addition
hsa-let-7e-5p|0|-1	TGAGGTAGGAGGTTGTATAGT	isomiR	end-site
hsa-let-7e-5p|0|-2	TGAGGTAGGAGGTTGTATAG	isomiR	end-site
hsa-let-7e-5p|0|-3	TGAGGTAGGAGGTTGTATA	isomiR	end-site
hsa-let-7e-5p|0|-3(+1U)	TGAGGTAGGAGGTTGTATAT	isomiR	mixed: end-site + 3' non-templated addition
hsa-let-7e-5p|0|-3(+3U)	TGAGGTAGGAGGTTGTATATTT	isomiR	mixed: end-site + 3' non-templated addition
hsa-let-7e-5p|0|-4	TGAGGTAGGAGGTTGTAT	isomiR	end-site
hsa-let-7e-5p|0|-4(+1U)	TGAGGTAGGAGGTTGTATT	isomiR	mixed: end-site + 3' non-templated addition
hsa-let-7f-1-3p|0|-1	CTATACAATCTATTGCCTTCC	isomiR (orphan)	end-site
hsa-let-7f-1-3p|0|-1(+1U)	CTATACAATCTATTGCCTTCCT	isomiR (orphan)	mixed: end-site + 3' non-templated addition
hsa-let-7f-5p|+1|0	GAGGTAGTAGATTGTATAGTT	isomiR	start-site
hsa-let-7f-5p|+1|-1	GAGGTAGTAGATTGTATAGT	isomiR	mixed: start-site + end-site
hsa-let-7f-5p|+3|0	GGTAGTAGATTGTATAGTT	isomiR	start-site
hsa-let-7f-5p|+3|-1	GGTAGTAGATTGTATAGT	isomiR	mixed: start-site + end-site
hsa-let-7f-5p|+4|0	GTAGTAGATTGTATAGTT	isomiR	start-site
hsa-let-7f-5p|+5|+4	TAGTAGATTGTATAGTTGTGG	isomiR	mixed: start-site + end-site
hsa-let-7f-5p|+5|+5	TAGTAGATTGTATAGTTGTGGG	isomiR	shifted
hsa-let-7f-5p|0|+1	TGAGGTAGTAGATTGTATAGTTT	isomiR	3' non-templated addition
hsa-let-7f-5p|0|+1	TGAGGTAGTAGATTGTATAGTTG	isomiR	end-site
hsa-let-7f-5p|0|+2	TGAGGTAGTAGATTGTATAGTTGT	isomiR	end-site
hsa-let-7f-5p|0|+4	TGAGGTAGTAGATTGTATAGTTGTGG	isomiR	end-site
hsa-let-7f-5p|0|0	TGAGGTAGTAGATTGTATAGTT	canonical miRNA
hsa-let-7f-5p|0|-1	TGAGGTAGTAGATTGTATAGT	isomiR	end-site
hsa-let-7f-5p|0|-2	TGAGGTAGTAGATTGTATAG	isomiR	end-site
hsa-let-7f-5p|0|-3	TGAGGTAGTAGATTGTATA	isomiR	end-site
hsa-let-7f-5p|0|-3(+1U)	TGAGGTAGTAGATTGTATAT	isomiR	mixed: end-site + 3' non-templated addition
hsa-let-7f-5p|0|-3(+2U)	TGAGGTAGTAGATTGTATATT	isomiR	mixed: end-site + 3' non-templated addition
hsa-let-7f-5p|0|-3(+3U)	TGAGGTAGTAGATTGTATATTT	isomiR	mixed: end-site + 3' non-templated addition
hsa-let-7f-5p|0|-4	TGAGGTAGTAGATTGTAT	isomiR	end-site
hsa-let-7f-5p|-1|0	ATGAGGTAGTAGATTGTATAGTT	isomiR	5' non-templated addition
hsa-let-7f-5p|-1|-1	ATGAGGTAGTAGATTGTATAGT	isomiR	mixed: 5' non-templated addition + end-site
hsa-let-7f-5p|-1|-2	ATGAGGTAGTAGATTGTATAG	isomiR	mixed: 5' non-templated addition + end-site
hsa-let-7g-3p|0|0	CTGTACAGGCCACTGCCTTGC	canonical miRNA
hsa-let-7g-3p|0|0(+1U)	CTGTACAGGCCACTGCCTTGCT	isomiR	3' non-templated addition
hsa-let-7g-3p|0|-1	CTGTACAGGCCACTGCCTTG	isomiR	end-site
hsa-let-7g-5p|+1|0	GAGGTAGTAGTTTGTACAGTT	isomiR	start-site
hsa-let-7g-5p|+3|0	GGTAGTAGTTTGTACAGTT	isomiR	start-site
hsa-let-7g-5p|+4|0	GTAGTAGTTTGTACAGTT	isomiR	start-site
hsa-let-7g-5p|0|+1	TGAGGTAGTAGTTTGTACAGTTT	isomiR	end-site
hsa-let-7g-5p|0|0	TGAGGTAGTAGTTTGTACAGTT	canonical miRNA
hsa-let-7g-5p|0|-1	TGAGGTAGTAGTTTGTACAGT	isomiR	end-site
hsa-let-7g-5p|0|-2	TGAGGTAGTAGTTTGTACAG	isomiR	end-site
hsa-let-7g-5p|0|-3	TGAGGTAGTAGTTTGTACA	isomiR	end-site
hsa-let-7g-5p|0|-4	TGAGGTAGTAGTTTGTAC	isomiR	end-site
hsa-let-7g-5p|-1|0	CTGAGGTAGTAGTTTGTACAGTT	isomiR	start-site
hsa-let-7g-5p|-1|-1	CTGAGGTAGTAGTTTGTACAGT	isomiR	shifted
hsa-let-7g-5p|-1|-2	CTGAGGTAGTAGTTTGTACAG	isomiR	mixed: start-site + end-site
hsa-let-7i-3p|0|0	CTGCGCAAGCTACTGCCTTGCT	canonical miRNA
hsa-let-7i-3p|0|-1	CTGCGCAAGCTACTGCCTTGC	isomiR	end-site
hsa-let-7i-3p|0|-2	CTGCGCAAGCTACTGCCTTG	isomiR	end-site
hsa-let-7i-3p|0|-2(+1U)	CTGCGCAAGCTACTGCCTTGT	isomiR	mixed: end-site + 3' non-templated addition
hsa-let-7i-3p|0|-2(+2U)	CTGCGCAAGCTACTGCCTTGTT	isomiR	mixed: end-site + 3' non-templated addition
hsa-let-7i-3p|0|-3	CTGCGCAAGCTACTGCCTT	isomiR	end-site
hsa-let-7i-3p|0|-3(+1U)	CTGCGCAAGCTACTGCCTTT	isomiR	mixed: end-site + 3' non-templated addition
hsa-let-7i-5p|+3|+1	GGTAGTAGTTTGTGCTGTTG	isomiR	mixed: start-site + end-site
hsa-let-7i-5p|+3|0	GGTAGTAGTTTGTGCTGTT	isomiR	start-site
hsa-let-7i-5p|+3|0(+1U)	GGTAGTAGTTTGTGCTGTTT	isomiR	mixed: start-site + 3' non-templated addition
hsa-let-7i-5p|+3|-1	GGTAGTAGTTTGTGCTGT	isomiR	mixed: start-site + end-site
hsa-let-7i-5p|+4|0	GTAGTAGTTTGTGCTGTT	isomiR	start-site
hsa-let-7i-5p|+4|0(+1U)	GTAGTAGTTTGTGCTGTTT	isomiR	mixed: start-site + 3' non-templated addition
hsa-let-7i-5p|0|+1	TGAGGTAGTAGTTTGTGCTGTTG	isomiR	end-site
hsa-let-7i-5p|0|+1(+1U)	TGAGGTAGTAGTTTGTGCTGTTGT	isomiR	mixed: start-site + 3' non-templated addition
hsa-let-7i-5p|0|+2	TGAGGTAGTAGTTTGTGCTGTTGG	isomiR	end-site
hsa-let-7i-5p|0|0	TGAGGTAGTAGTTTGTGCTGTT	canonical miRNA
hsa-let-7i-5p|0|0(+1U)	TGAGGTAGTAGTTTGTGCTGTTT	isomiR	3' non-templated addition
hsa-let-7i-5p|0|0(+2U)	TGAGGTAGTAGTTTGTGCTGTTTT	isomiR	3' non-templated addition
hsa-let-7i-5p|0|-1	TGAGGTAGTAGTTTGTGCTGT	isomiR	end-site
hsa-let-7i-5p|0|-2	TGAGGTAGTAGTTTGTGCTG	isomiR	end-site
hsa-let-7i-5p|0|-3	TGAGGTAGTAGTTTGTGCT	isomiR	end-site
hsa-let-7i-5p|0|-4	TGAGGTAGTAGTTTGTGC	isomiR	end-site
hsa-miR-100-5p|+1|0	ACCCGTAGATCCGAACTTGTG	isomiR	end-site
hsa-miR-100-5p|+1|0(+1U)	ACCCGTAGATCCGAACTTGTGT	isomiR	mixed: start-site + 3' non-templated addition
hsa-miR-100-5p|+1|-1	ACCCGTAGATCCGAACTTGT	isomiR	mixed: start-site + end-site
hsa-miR-100-5p|+1|-2	ACCCGTAGATCCGAACTTG	isomiR	mixed: start-site + end-site
hsa-miR-100-5p|+1|-3	ACCCGTAGATCCGAACTT	isomiR	mixed: start-site + end-site
hsa-miR-100-5p|+2|0	CCCGTAGATCCGAACTTGTG	isomiR	start-site
hsa-miR-100-5p|+2|0(+1U)	CCCGTAGATCCGAACTTGTGT	isomiR	mixed: start-site + 3' non-templated addition
hsa-miR-100-5p|+2|-1	CCCGTAGATCCGAACTTGT	isomiR	mixed: start-site + end-site
hsa-miR-100-5p|+3|-1	CCGTAGATCCGAACTTGT	isomiR	mixed: start-site + end-site
hsa-miR-100-5p|+4|0	CGTAGATCCGAACTTGTG	isomiR	start-site
hsa-miR-100-5p|0|+1	AACCCGTAGATCCGAACTTGTGG	isomiR	end-site
hsa-miR-100-5p|0|+2	AACCCGTAGATCCGAACTTGTGGT	isomiR	end-site
hsa-miR-100-5p|0|0	AACCCGTAGATCCGAACTTGTG	canonical miRNA
hsa-miR-100-5p|0|0(+1U)	AACCCGTAGATCCGAACTTGTGT	isomiR	3' non-templated addition
hsa-miR-100-5p|0|0(+2U)	AACCCGTAGATCCGAACTTGTGTT	isomiR	3' non-templated addition
hsa-miR-100-5p|0|-1	AACCCGTAGATCCGAACTTGT	isomiR	end-site
hsa-miR-100-5p|0|-1(+1U)	AACCCGTAGATCCGAACTTGTT	isomiR	mixed: end-site + 3' non-templated addition
hsa-miR-100-5p|0|-1(+2U)	AACCCGTAGATCCGAACTTGTTT	isomiR	mixed: end-site + 3' non-templated addition
hsa-miR-100-5p|0|-2	AACCCGTAGATCCGAACTTG	isomiR	end-site
hsa-miR-100-5p|0|-3	AACCCGTAGATCCGAACTT	isomiR	end-site
hsa-miR-100-5p|0|-3(+1U)	AACCCGTAGATCCGAACTTT	isomiR	mixed: end-site + 3' non-templated addition
hsa-miR-100-5p|0|-3(+2U)	AACCCGTAGATCCGAACTTTT	isomiR	mixed: end-site + 3' non-templated addition
hsa-miR-100-5p|0|-4	AACCCGTAGATCCGAACT	isomiR	end-site
hsa-miR-100-5p|-1|-1	AAACCCGTAGATCCGAACTTGT	isomiR	shifted
hsa-miR-101-3p|+1|0(+1U)	ACAGTACTGTGATAACTGAAT	isomiR	mixed: start-site + 3' non-templated addition
hsa-miR-101-3p|+1|-1	ACAGTACTGTGATAACTGA	isomiR	mixed: start-site + end-site
hsa-miR-101-3p|+2|0(+1U)	CAGTACTGTGATAACTGAAT	isomiR	mixed: start-site + 3' non-templated addition
hsa-miR-101-3p|+2|0(+2U)	CAGTACTGTGATAACTGAATT	isomiR	mixed: start-site + 3' non-templated addition
hsa-miR-101-3p|+2|-1	CAGTACTGTGATAACTGA	isomiR	mixed: start-site + end-site
hsa-miR-101-3p|0|+1	TACAGTACTGTGATAACTGAAG	isomiR	end-site
hsa-miR-101-3p|0|+1(+1U)	TACAGTACTGTGATAACTGAAGT	isomiR	mixed: end-site + 3' non-templated addition
hsa-miR-101-3p|0|+2	TACAGTACTGTGATAACTGAAGA	isomiR	mixed: end-site + 3' non-templated addition
hsa-miR-101-3p|0|+3	TACAGTACTGTGATAACTGAAGAA	isomiR	mixed: end-site + 3' non-templated addition
hsa-miR-101-3p|0|0	TACAGTACTGTGATAACTGAA	canonical miRNA
hsa-miR-101-3p|0|0(+1U)	TACAGTACTGTGATAACTGAAT	isomiR	3' non-templated addition
hsa-miR-101-3p|0|0(+2U)	TACAGTACTGTGATAACTGAATT	isomiR	3' non-templated addition
hsa-miR-101-3p|0|-1	TACAGTACTGTGATAACTGA	isomiR	end-site
hsa-miR-101-3p|0|-1(+1U)	TACAGTACTGTGATAACTGAT	isomiR	mixed: end-site + 3' non-templated addition
hsa-miR-101-3p|0|-1(+2U)	TACAGTACTGTGATAACTGATT	isomiR	mixed: end-site + 3' non-templated addition
hsa-miR-101-3p|0|-2	TACAGTACTGTGATAACTG	isomiR	end-site
hsa-miR-101-3p|0|-2(+1U)	TACAGTACTGTGATAACTGT	isomiR	mixed: end-site + 3' non-templated addition
hsa-miR-101-3p|0|-3	TACAGTACTGTGATAACT	isomiR	end-site
hsa-miR-101-3p|-1|+1	GTACAGTACTGTGATAACTGAAG	isomiR	mixed: start-site + end-site
hsa-miR-101-3p|-1|0	GTACAGTACTGTGATAACTGAA	isomiR	start-site
hsa-miR-101-3p|-1|0(+1U)	GTACAGTACTGTGATAACTGAAT	isomiR	mixed: start-site + 3' non-templated addition
hsa-miR-101-3p|-1|-1	GTACAGTACTGTGATAACTGA	isomiR	shifted
hsa-miR-101-3p|-1|-1(+1U)	GTACAGTACTGTGATAACTGAT	isomiR	mixed: shifted + 3' non-templated addition
hsa-miR-101-3p|-1|-2	GTACAGTACTGTGATAACTG	isomiR	mixed: start-site + end-site
hsa-miR-101-3p|-1|-2(+1U)	GTACAGTACTGTGATAACTGT	isomiR	mixed: start-site + end-site + 3' non-templated addition
hsa-miR-101-3p|-1|-3	GTACAGTACTGTGATAACT	isomiR	mixed: start-site + end-site
hsa-miR-101-5p|-1|-1	TCAGTTATCACAGTGCTGATGC	isomiR (orphan)	mixed: start-site + end-site
hsa-miR-101-5p|-1|-2	TCAGTTATCACAGTGCTGATG	isomiR (orphan)	mixed: start-site + end-site
hsa-miR-10393-3p|0|-1]	TGGTCAGATTTGAACTCTTCA	isomiR (orphan)	end-site
hsa-miR-10393-3p|-1|-1]	TTGGTCAGATTTGAACTCTTCA	isomiR (orphan)	shifted
hsa-miR-10393-3p|-2|-1]	CTTGGTCAGATTTGAACTCTTCA	isomiR (orphan)	mixed: start-site + end-site
hsa-miR-10393-3p|-3|-1]	TCTTGGTCAGATTTGAACTCTTCA	isomiR (orphan)	mixed: start-site + end-site
hsa-miR-10393-5p|+24|+24	ATCTTGGTCAGATTTGAACTCTTCA	isomiR (orphan)	shifted
hsa-miR-10395-3p|+1|0	TGTATTCGTACTGTCTGATG	isomiR	start-site
hsa-miR-10395-3p|+3|0	TATTCGTACTGTCTGATG	isomiR	start-site
hsa-miR-10395-3p|0|0	ATGTATTCGTACTGTCTGATG	canonical miRNA
hsa-miR-10395-3p|-5|0	TTGGGATGTATTCGTACTGTCTGATG	isomiR	start-site
hsa-miR-10397-5p|-1|-2	TTCCTTGACCTGATGCTGTAG	isomiR (orphan)	mixed: start-site + end-site
hsa-miR-10397-5p|-2|-2	TTTCCTTGACCTGATGCTGTAG	isomiR (orphan)	shifted
hsa-miR-10399-3p|+1|-1(+1U)	TCTCGGACAAGCTGTAGGTT	isomiR (orphan)	mixed: start-site + end-site + 3' non-templated addition
hsa-miR-10399-3p|+1|-1(+2U)	TCTCGGACAAGCTGTAGGTTT	isomiR (orphan)	mixed: start-site + end-site + 3' non-templated addition
hsa-miR-10399-3p|0|-1	CTCTCGGACAAGCTGTAGGT	isomiR (orphan)	end-site
hsa-miR-10399-3p|0|-1(+1U)	CTCTCGGACAAGCTGTAGGTT	isomiR (orphan)	mixed: end-site + 3' non-templated addition
hsa-miR-10399-3p|-1|-1	TCTCTCGGACAAGCTGTAGGT	isomiR (orphan)	shifted
hsa-miR-10399-3p|-1|-1(+1U)	TCTCTCGGACAAGCTGTAGGTT	isomiR (orphan)	mixed: shifted + 3' non-templated addition
hsa-miR-10399-3p|-1|-1(+2U)	TCTCTCGGACAAGCTGTAGGTTT	isomiR (orphan)	mixed: shifted + 3' non-templated addition
hsa-miR-10399-3p|-1|-2	TCTCTCGGACAAGCTGTAGG	isomiR (orphan)	mixed: start-site + end-site
hsa-miR-10399-3p|-1|-3	TCTCTCGGACAAGCTGTAG	isomiR (orphan)	mixed: start-site + end-site
hsa-miR-10399-3p|-2|-2	CTCTCTCGGACAAGCTGTAGG	isomiR (orphan)	shifted
hsa-miR-10399-3p|-2|-3	CTCTCTCGGACAAGCTGTAG	isomiR (orphan)	mixed: start-site + end-site
hsa-miR-10399-3p|-3|-1	ACTCTCTCGGACAAGCTGTAGGT	isomiR (orphan)	mixed: start-site + end-site
hsa-miR-10399-3p|-3|-2	ACTCTCTCGGACAAGCTGTAGG	isomiR (orphan)	mixed: start-site + end-site
hsa-miR-10399-3p|-3|-3	ACTCTCTCGGACAAGCTGTAG	isomiR (orphan)	shifted
hsa-miR-10399-3p|-4|-1	TACTCTCTCGGACAAGCTGTAGGT	isomiR (orphan)	mixed: start-site + end-site
hsa-miR-10399-3p|-4|-2	TACTCTCTCGGACAAGCTGTAGG	isomiR (orphan)	mixed: start-site + end-site
hsa-miR-10399-3p|-4|-3	TACTCTCTCGGACAAGCTGTAG	isomiR (orphan)	mixed: start-site + end-site
hsa-miR-10399-3p|-4|-3(+1U)	TACTCTCTCGGACAAGCTGTAGT	isomiR (orphan)	mixed: start-site + end-site + 3' non-templated addition
hsa-miR-10399-5p|+1|+1	ATTACAGATTGTCTCAGAGAA	isomiR	shifted
hsa-miR-10399-5p|+1|+2	ATTACAGATTGTCTCAGAGAAA	isomiR	mixed: start-site + end-site
hsa-miR-10399-5p|+1|0	ATTACAGATTGTCTCAGAGA	isomiR	start-site
hsa-miR-10399-5p|+2|+1	TTACAGATTGTCTCAGAGAA	isomiR	mixed: start-site + end-site
hsa-miR-10399-5p|+2|+2	TTACAGATTGTCTCAGAGAAA	isomiR	shifted
hsa-miR-10399-5p|+2|+3	TTACAGATTGTCTCAGAGAAAA	isomiR	mixed: start-site + end-site
hsa-miR-10399-5p|+2|0	TTACAGATTGTCTCAGAGA	isomiR	start-site
hsa-miR-10399-5p|0|+1	AATTACAGATTGTCTCAGAGAA	isomiR	end-site
hsa-miR-10399-5p|0|+1(+1U)	AATTACAGATTGTCTCAGAGAAT	isomiR	mixed: end-site + 3' non-templated addition
hsa-miR-10399-5p|0|+2	AATTACAGATTGTCTCAGAGAAA	isomiR	end-site
hsa-miR-10399-5p|0|0	AATTACAGATTGTCTCAGAGA	canonical miRNA
hsa-miR-10399-5p|0|-1	AATTACAGATTGTCTCAGAG	isomiR	end-site
hsa-miR-10399-5p|-1|0	AAATTACAGATTGTCTCAGAGA	isomiR	start-site
hsa-miR-10399-5p|-1|-1	AAATTACAGATTGTCTCAGAG	isomiR	shifted
hsa-miR-103a-1-5p|0|0	GGCTTCTTTACAGTGCTGCCTTG	canonical miRNA (without isomiR)
hsa-miR-103a-2-5p|0|0	AGCTTCTTTACAGTGCTGCCTTG	canonical miRNA (without isomiR)
hsa-miR-103a-3p|+1|0	GCAGCATTGTACAGGGCTATGA	isomiR	start-site
hsa-miR-103a-3p|+1|-1	GCAGCATTGTACAGGGCTATG	isomiR	mixed: start-site + end-site
hsa-miR-103a-3p|+1|-1(+1U)	GCAGCATTGTACAGGGCTATGT	isomiR	mixed: start-site + end-site + 3' non-templated addition
hsa-miR-103a-3p|+2|+1	CAGCATTGTACAGGGCTATGAA	isomiR	mixed: start-site + end-site
hsa-miR-103a-3p|+2|+2	CAGCATTGTACAGGGCTATGAAA	isomiR	shifted
hsa-miR-103a-3p|+2|0	CAGCATTGTACAGGGCTATGA	isomiR	start-site
hsa-miR-103a-3p|+2|0(+1U)	CAGCATTGTACAGGGCTATGAT	isomiR	mixed: start-site + 3' non-templated addition
hsa-miR-103a-3p|+2|-1	CAGCATTGTACAGGGCTATG	isomiR	mixed: start-site + end-site
hsa-miR-103a-3p|+2|-1(+1U)	CAGCATTGTACAGGGCTATGT	isomiR	mixed: start-site + end-site + 3' non-templated addition
hsa-miR-103a-3p|+3|0	AGCATTGTACAGGGCTATGA	isomiR	start-site
hsa-miR-103a-3p|+3|-1	AGCATTGTACAGGGCTATG	isomiR	mixed: start-site + end-site
hsa-miR-103a-3p|+4|+1	GCATTGTACAGGGCTATGAA	isomiR	mixed: start-site + end-site
hsa-miR-103a-3p|+4|0	GCATTGTACAGGGCTATGA	isomiR	start-site
hsa-miR-103a-3p|+4|-1	GCATTGTACAGGGCTATG	isomiR	mixed: start-site + end-site
hsa-miR-103a-3p|+4|-1(+1U)	GCATTGTACAGGGCTATGT	isomiR	mixed: start-site + end-site + 3' non-templated addition
hsa-miR-103a-3p|+5|0	CATTGTACAGGGCTATGA	isomiR	start-site
hsa-miR-103a-3p|0|+1	AGCAGCATTGTACAGGGCTATGAA	isomiR	end-site
hsa-miR-103a-3p|0|+1(+1U)	AGCAGCATTGTACAGGGCTATGAAT	isomiR	mixed: end-site + 3' non-templated addition
hsa-miR-103a-3p|0|+2	AGCAGCATTGTACAGGGCTATGAAA	isomiR	end-site
hsa-miR-103a-3p|0|+2	AGCAGCATTGTACAGGGCTATGAAG	isomiR	mixed: end-site + 3' non-templated addition
hsa-miR-103a-3p|0|0	AGCAGCATTGTACAGGGCTATGA	canonical miRNA
hsa-miR-103a-3p|0|0(+1U)	AGCAGCATTGTACAGGGCTATGAT	isomiR	3' non-templated addition
hsa-miR-103a-3p|0|0(+2U)	AGCAGCATTGTACAGGGCTATGATT	isomiR	3' non-templated addition
hsa-miR-103a-3p|0|-1	AGCAGCATTGTACAGGGCTATG	isomiR	end-site
hsa-miR-103a-3p|0|-1(+1U)	AGCAGCATTGTACAGGGCTATGT	isomiR	mixed: end-site + 3' non-templated addition
hsa-miR-103a-3p|0|-1(+2U)	AGCAGCATTGTACAGGGCTATGTT	isomiR	mixed: end-site + 3' non-templated addition
hsa-miR-103a-3p|-1|0	AAGCAGCATTGTACAGGGCTATGA	isomiR	end-site
hsa-miR-103a-3p|-1|-1	AAGCAGCATTGTACAGGGCTATG	isomiR	shifted
hsa-miR-10401-3p|-1|+1]	GACCTCGCCGTCCCGCCCGCCGC	isomiR (orphan)	mixed: start-site + end-site
hsa-miR-10401-3p|-1|0]	GACCTCGCCGTCCCGCCCGCCG	isomiR (orphan)	start-site
hsa-miR-10401-3p|-1|-1]	GACCTCGCCGTCCCGCCCGCC	isomiR (orphan)	shifted
hsa-miR-10401-3p|-1|-2]	GACCTCGCCGTCCCGCCCGC	isomiR (orphan)	mixed: start-site + end-site
hsa-miR-105-5p|+1|+1	CAAATGCTCAGACTCCTGTGGTG	isomiR	shifted
hsa-miR-105-5p|+1|0	CAAATGCTCAGACTCCTGTGGT	isomiR	start-site
hsa-miR-105-5p|+1|-1	CAAATGCTCAGACTCCTGTGG	isomiR	mixed: start-site + end-site
hsa-miR-105-5p|+2|+1	AAATGCTCAGACTCCTGTGGTG	isomiR	mixed: start-site + end-site
hsa-miR-105-5p|+2|+1(+1U)	AAATGCTCAGACTCCTGTGGTGT	isomiR	mixed: start-site + end-site + 3' non-templated addition
hsa-miR-105-5p|+2|0	AAATGCTCAGACTCCTGTGGT	isomiR	start-site
hsa-miR-105-5p|+2|-1	AAATGCTCAGACTCCTGTGG	isomiR	mixed: start-site + end-site
hsa-miR-105-5p|+3|+1	AATGCTCAGACTCCTGTGGTG	isomiR	mixed: start-site + end-site
hsa-miR-105-5p|+3|0	AATGCTCAGACTCCTGTGGT	isomiR	start-site
hsa-miR-105-5p|+3|-1	AATGCTCAGACTCCTGTGG	isomiR	mixed: start-site + end-site
hsa-miR-105-5p|+4|0	ATGCTCAGACTCCTGTGGT	isomiR	start-site
hsa-miR-105-5p|0|+1	TCAAATGCTCAGACTCCTGTGGTG	isomiR	end-site
hsa-miR-105-5p|0|+1(+1U)	TCAAATGCTCAGACTCCTGTGGTGT	isomiR	mixed: end-site + 3' non-templated addition
hsa-miR-105-5p|0|0	TCAAATGCTCAGACTCCTGTGGT	canonical miRNA
hsa-miR-105-5p|0|0(+1U)	TCAAATGCTCAGACTCCTGTGGTT	isomiR	3' non-templated addition
hsa-miR-105-5p|0|-1	TCAAATGCTCAGACTCCTGTGG	isomiR	end-site
hsa-miR-105-5p|0|-2	TCAAATGCTCAGACTCCTGTG	isomiR	end-site
hsa-miR-105-5p|0|-2(+1U)	TCAAATGCTCAGACTCCTGTGT	isomiR	mixed: end-site + 3' non-templated addition
hsa-miR-106a-5p|+1|+1	AAAGTGCTTACAGTGCAGGTAGC	isomiR	shifted
hsa-miR-106a-5p|0|0	AAAAGTGCTTACAGTGCAGGTAG	canonical miRNA
hsa-miR-106a-5p|0|0(+1U)	AAAAGTGCTTACAGTGCAGGTAGT	isomiR	3' non-templated addition
hsa-miR-106a-5p|0|-1	AAAAGTGCTTACAGTGCAGGTA	isomiR	end-site
hsa-miR-106a-5p|0|-2	AAAAGTGCTTACAGTGCAGGT	isomiR	end-site
hsa-miR-106b-3p|+1|-1	CGCACTGTGGGTACTTGCTG	isomiR	mixed: start-site + end-site
hsa-miR-106b-3p|0|+1	CCGCACTGTGGGTACTTGCTGCT	isomiR	end-site
hsa-miR-106b-3p|0|0	CCGCACTGTGGGTACTTGCTGC	canonical miRNA
hsa-miR-106b-3p|0|-1	CCGCACTGTGGGTACTTGCTG	isomiR	end-site
hsa-miR-106b-3p|0|-1(+1U)	CCGCACTGTGGGTACTTGCTGT	isomiR	mixed: end-site + 3' non-templated addition
hsa-miR-106b-3p|0|-1(+2U)	CCGCACTGTGGGTACTTGCTGTT	isomiR	mixed: end-site + 3' non-templated addition
hsa-miR-106b-3p|0|-2	CCGCACTGTGGGTACTTGCT	isomiR	end-site
hsa-miR-106b-3p|0|-2(+1U)	CCGCACTGTGGGTACTTGCTT	isomiR	mixed: end-site + 3' non-templated addition
hsa-miR-106b-3p|0|-3	CCGCACTGTGGGTACTTGC	isomiR	end-site
hsa-miR-106b-3p|0|-4	CCGCACTGTGGGTACTTG	isomiR	end-site
hsa-miR-106b-3p|-1|0	ACCGCACTGTGGGTACTTGCTGC	isomiR	start-site
hsa-miR-106b-3p|-1|-1	ACCGCACTGTGGGTACTTGCTG	isomiR	shifted
hsa-miR-106b-3p|-1|-2	ACCGCACTGTGGGTACTTGCT	isomiR	mixed: start-site + end-site
hsa-miR-106b-3p|-1|-3	ACCGCACTGTGGGTACTTGC	isomiR	mixed: start-site + end-site
hsa-miR-106b-3p|-2|0	TACCGCACTGTGGGTACTTGCTGC	isomiR	start-site
hsa-miR-106b-3p|-2|-1	TACCGCACTGTGGGTACTTGCTG	isomiR	mixed: start-site + end-site
hsa-miR-106b-3p|-2|-2	TACCGCACTGTGGGTACTTGCT	isomiR	shifted
hsa-miR-106b-3p|-2|-3	TACCGCACTGTGGGTACTTGC	isomiR	mixed: start-site + end-site
hsa-miR-106b-5p|0|+1	TAAAGTGCTGACAGTGCAGATA	isomiR	end-site
hsa-miR-106b-5p|0|+1(+1U)	TAAAGTGCTGACAGTGCAGATAT	isomiR	mixed: end-site + 3' non-templated addition
hsa-miR-106b-5p|0|+2	TAAAGTGCTGACAGTGCAGATAG	isomiR	end-site
hsa-miR-106b-5p|0|0	TAAAGTGCTGACAGTGCAGAT	canonical miRNA
hsa-miR-106b-5p|0|0(+1U)	TAAAGTGCTGACAGTGCAGATT	isomiR	3' non-templated addition
hsa-miR-106b-5p|0|-1	TAAAGTGCTGACAGTGCAGA	isomiR	end-site
hsa-miR-106b-5p|0|-2	TAAAGTGCTGACAGTGCAG	isomiR	end-site
hsa-miR-107|0|0	AGCAGCATTGTACAGGGCTATCA	canonical miRNA
hsa-miR-107|0|-1	AGCAGCATTGTACAGGGCTATC	isomiR	end-site
hsa-miR-107|0|-1(+1U)	AGCAGCATTGTACAGGGCTATCT	isomiR	mixed: end-site + 3' non-templated addition
hsa-miR-107|0|-2	AGCAGCATTGTACAGGGCTAT	isomiR	end-site
hsa-miR-107|0|-2(+1U)	AGCAGCATTGTACAGGGCTATT	isomiR	mixed: end-site + 3' non-templated addition
hsa-miR-107|0|-2(+2U)	AGCAGCATTGTACAGGGCTATTT	isomiR	mixed: end-site + 3' non-templated addition
hsa-miR-107|0|-3	AGCAGCATTGTACAGGGCTA	isomiR	end-site
hsa-miR-107|0|-4	AGCAGCATTGTACAGGGCT	isomiR	end-site
hsa-miR-107|0|-4(+1U)	AGCAGCATTGTACAGGGCTT	isomiR	mixed: end-site + 3' non-templated addition
hsa-miR-107|0|-4(+2U)	AGCAGCATTGTACAGGGCTTT	isomiR	mixed: end-site + 3' non-templated addition
hsa-miR-10a-3p|0|-1	CAAATTCGTATCTAGGGGAAT	isomiR (orphan)	end-site
hsa-miR-10a-5p|+1|+1	ACCCTGTAGATCCGAATTTGTGT	isomiR	shifted
hsa-miR-10a-5p|+1|+1(+1U)	ACCCTGTAGATCCGAATTTGTGTT	isomiR	mixed: shifted + 3' non-templated addition
hsa-miR-10a-5p|+1|+2	ACCCTGTAGATCCGAATTTGTGTA	isomiR	mixed: start-site + end-site
hsa-miR-10a-5p|+1|0	ACCCTGTAGATCCGAATTTGTG	isomiR	start-site
hsa-miR-10a-5p|+1|-1	ACCCTGTAGATCCGAATTTGT	isomiR	mixed: start-site + end-site
hsa-miR-10a-5p|+1|-1(+1U)	ACCCTGTAGATCCGAATTTGTT	isomiR	mixed: start-site + end-site + 3' non-templated addition
hsa-miR-10a-5p|+1|-1(+2U)	ACCCTGTAGATCCGAATTTGTTT	isomiR	mixed: start-site + end-site + 3' non-templated addition
hsa-miR-10a-5p|+1|-2	ACCCTGTAGATCCGAATTTG	isomiR	mixed: start-site + end-site
hsa-miR-10a-5p|+1|-3	ACCCTGTAGATCCGAATTT	isomiR	mixed: start-site + end-site
hsa-miR-10a-5p|+1|-3(+1U)	ACCCTGTAGATCCGAATTTT	isomiR	mixed: start-site + end-site + 3' non-templated addition
hsa-miR-10a-5p|+1|-3(+2U)	ACCCTGTAGATCCGAATTTTT	isomiR	mixed: start-site + end-site + 3' non-templated addition
hsa-miR-10a-5p|+1|-4	ACCCTGTAGATCCGAATT	isomiR	mixed: start-site + end-site
hsa-miR-10a-5p|+2|+1	CCCTGTAGATCCGAATTTGTGT	isomiR	mixed: start-site + end-site
hsa-miR-10a-5p|+2|0	CCCTGTAGATCCGAATTTGTG	isomiR	start-site
hsa-miR-10a-5p|+2|-1	CCCTGTAGATCCGAATTTGT	isomiR	mixed: start-site + end-site
hsa-miR-10a-5p|+2|-2	CCCTGTAGATCCGAATTTG	isomiR	mixed: start-site + end-site
hsa-miR-10a-5p|+3|+1	CCTGTAGATCCGAATTTGTGT	isomiR	mixed: start-site + end-site
hsa-miR-10a-5p|+3|0	CCTGTAGATCCGAATTTGTG	isomiR	start-site
hsa-miR-10a-5p|+3|-1	CCTGTAGATCCGAATTTGT	isomiR	mixed: start-site + end-site
hsa-miR-10a-5p|+4|+1	CTGTAGATCCGAATTTGTGT	isomiR	mixed: start-site + end-site
hsa-miR-10a-5p|+4|0	CTGTAGATCCGAATTTGTG	isomiR	start-site
hsa-miR-10a-5p|+4|-1	CTGTAGATCCGAATTTGT	isomiR	mixed: start-site + end-site
hsa-miR-10a-5p|0|+1	TACCCTGTAGATCCGAATTTGTGT	isomiR	end-site
hsa-miR-10a-5p|0|+2	TACCCTGTAGATCCGAATTTGTGTA	isomiR	end-site
hsa-miR-10a-5p|0|0	TACCCTGTAGATCCGAATTTGTG	canonical miRNA
hsa-miR-10a-5p|0|-1	TACCCTGTAGATCCGAATTTGT	isomiR	end-site
hsa-miR-10a-5p|0|-1(+1U)	TACCCTGTAGATCCGAATTTGTT	isomiR	mixed: end-site + 3' non-templated addition
hsa-miR-10a-5p|0|-1(+2U)	TACCCTGTAGATCCGAATTTGTTT	isomiR	mixed: end-site + 3' non-templated addition
hsa-miR-10a-5p|0|-2	TACCCTGTAGATCCGAATTTG	isomiR	end-site
hsa-miR-10a-5p|0|-3	TACCCTGTAGATCCGAATTT	isomiR	end-site
hsa-miR-10a-5p|0|-3(+1U)	TACCCTGTAGATCCGAATTTT	isomiR	mixed: end-site + 3' non-templated addition
hsa-miR-10a-5p|0|-3(+2U)	TACCCTGTAGATCCGAATTTTT	isomiR	mixed: end-site + 3' non-templated addition
hsa-miR-10a-5p|0|-4	TACCCTGTAGATCCGAATT	isomiR	end-site
hsa-miR-10a-5p|0|-5	TACCCTGTAGATCCGAAT	isomiR	end-site
hsa-miR-10a-5p|-1|+1	ATACCCTGTAGATCCGAATTTGTGT	isomiR	mixed: start-site + end-site
hsa-miR-10a-5p|-1|0	ATACCCTGTAGATCCGAATTTGTG	isomiR	start-site
hsa-miR-10a-5p|-1|-1	ATACCCTGTAGATCCGAATTTGT	isomiR	shifted
hsa-miR-10a-5p|-1|-2	ATACCCTGTAGATCCGAATTTG	isomiR	mixed: start-site + end-site
hsa-miR-10a-5p|-1|-3	ATACCCTGTAGATCCGAATTT	isomiR	mixed: start-site + end-site
hsa-miR-10b-5p|+1|+1	ACCCTGTAGAACCGAATTTGTGT	isomiR	shifted
hsa-miR-10b-5p|+1|+1(+1U)	ACCCTGTAGAACCGAATTTGTGTT	isomiR	mixed: shifted + 3' non-templated addition
hsa-miR-10b-5p|+1|+2	ACCCTGTAGAACCGAATTTGTGTG	isomiR	mixed: start-site + end-site
hsa-miR-10b-5p|+1|+2(+1U)	ACCCTGTAGAACCGAATTTGTGTGT	isomiR	mixed: start-site + end-site + 3' non-templated addition
hsa-miR-10b-5p|+1|+3	ACCCTGTAGAACCGAATTTGTGTGG	isomiR	mixed: start-site + end-site
hsa-miR-10b-5p|+1|0	ACCCTGTAGAACCGAATTTGTG	isomiR	start-site
hsa-miR-10b-5p|+1|-1	ACCCTGTAGAACCGAATTTGT	isomiR	mixed: start-site + end-site
hsa-miR-10b-5p|+1|-1(+1U)	ACCCTGTAGAACCGAATTTGTT	isomiR	mixed: start-site + end-site + 3' non-templated addition
hsa-miR-10b-5p|+1|-1(+2U)	ACCCTGTAGAACCGAATTTGTTT	isomiR	mixed: start-site + end-site + 3' non-templated addition
hsa-miR-10b-5p|+1|-2	ACCCTGTAGAACCGAATTTG	isomiR	mixed: start-site + end-site
hsa-miR-10b-5p|+1|-3	ACCCTGTAGAACCGAATTT	isomiR	mixed: start-site + end-site
hsa-miR-10b-5p|+1|-3(+1U)	ACCCTGTAGAACCGAATTTT	isomiR	mixed: start-site + end-site + 3' non-templated addition
hsa-miR-10b-5p|+1|-3(+2U)	ACCCTGTAGAACCGAATTTTT	isomiR	mixed: start-site + end-site + 3' non-templated addition
hsa-miR-10b-5p|+1|-4	ACCCTGTAGAACCGAATT	isomiR	mixed: start-site + end-site
hsa-miR-10b-5p|+2|+1	CCCTGTAGAACCGAATTTGTGT	isomiR	mixed: start-site + end-site
hsa-miR-10b-5p|+2|0	CCCTGTAGAACCGAATTTGTG	isomiR	start-site
hsa-miR-10b-5p|+2|-1	CCCTGTAGAACCGAATTTGT	isomiR	mixed: start-site + end-site
hsa-miR-10b-5p|+2|-2	CCCTGTAGAACCGAATTTG	isomiR	mixed: start-site + end-site
hsa-miR-10b-5p|+3|0	CCTGTAGAACCGAATTTGTG	isomiR	start-site
hsa-miR-10b-5p|+3|-1	CCTGTAGAACCGAATTTGT	isomiR	mixed: start-site + end-site
hsa-miR-10b-5p|+4|0	CTGTAGAACCGAATTTGTG	isomiR	start-site
hsa-miR-10b-5p|+4|-1	CTGTAGAACCGAATTTGT	isomiR	mixed: start-site + end-site
hsa-miR-10b-5p|0|+1	TACCCTGTAGAACCGAATTTGTGT	isomiR	end-site
hsa-miR-10b-5p|0|+1(+1U)	TACCCTGTAGAACCGAATTTGTGTT	isomiR	mixed: end-site + 3' non-templated addition
hsa-miR-10b-5p|0|0	TACCCTGTAGAACCGAATTTGTG	canonical miRNA
hsa-miR-10b-5p|0|-1	TACCCTGTAGAACCGAATTTGT	isomiR	end-site
hsa-miR-10b-5p|0|-1(+1U)	TACCCTGTAGAACCGAATTTGTT	isomiR	mixed: end-site + 3' non-templated addition
hsa-miR-10b-5p|0|-1(+2U)	TACCCTGTAGAACCGAATTTGTTT	isomiR	mixed: end-site + 3' non-templated addition
hsa-miR-10b-5p|0|-2	TACCCTGTAGAACCGAATTTG	isomiR	end-site
hsa-miR-10b-5p|0|-3	TACCCTGTAGAACCGAATTT	isomiR	end-site
hsa-miR-10b-5p|0|-3(+10U)	TACCCTGTAGAACCGAATTTTTTTTTTTTT	isomiR	mixed: end-site + 3' non-templated addition
hsa-miR-10b-5p|0|-3(+1U)	TACCCTGTAGAACCGAATTTT	isomiR	mixed: end-site + 3' non-templated addition
hsa-miR-10b-5p|0|-3(+2U)	TACCCTGTAGAACCGAATTTTT	isomiR	mixed: end-site + 3' non-templated addition
hsa-miR-10b-5p|0|-4	TACCCTGTAGAACCGAATT	isomiR	end-site
hsa-miR-10b-5p|0|-5	TACCCTGTAGAACCGAAT	isomiR	end-site
hsa-miR-10b-5p|-1|0	ATACCCTGTAGAACCGAATTTGTG	isomiR	start-site
hsa-miR-10b-5p|-1|-1	ATACCCTGTAGAACCGAATTTGT	isomiR	shifted
hsa-miR-1180-3p|0|0	TTTCCGGCTCGCGTGGGTGTGT	canonical miRNA
hsa-miR-1180-3p|0|0(+1U)	TTTCCGGCTCGCGTGGGTGTGTT	isomiR	3' non-templated addition
hsa-miR-1180-3p|0|-1	TTTCCGGCTCGCGTGGGTGTG	isomiR	end-site
hsa-miR-1180-3p|0|-2	TTTCCGGCTCGCGTGGGTGT	isomiR	end-site
hsa-miR-1180-3p|0|-3	TTTCCGGCTCGCGTGGGTG	isomiR	end-site
hsa-miR-12136|0|+1]	GAAAAAGTCATGGAGGCCA	isomiR	end-site
hsa-miR-12136|0|+3]	GAAAAAGTCATGGAGGCCATG	isomiR	end-site
hsa-miR-12136|0|+4]	GAAAAAGTCATGGAGGCCATGG	isomiR	end-site
hsa-miR-12136|0|+5]	GAAAAAGTCATGGAGGCCATGGG	isomiR	end-site
hsa-miR-12136|0|0]	GAAAAAGTCATGGAGGCC	canonical miRNA
hsa-miR-1226-3p|0|0	TCACCAGCCCTGTGTTCCCTAG	canonical miRNA
hsa-miR-1226-3p|0|0(+1U)	TCACCAGCCCTGTGTTCCCTAGT	isomiR	3' non-templated addition
hsa-miR-1227-3p|0|0(+1U)	CGTGCCACCCTTTTCCCCAGT	isomiR (orphan)	3' non-templated addition
hsa-miR-1228-3p|0|+1	TCACACCTGCCTCGCCCCCCA	isomiR (orphan)	end-site
hsa-miR-1228-5p|0|+1	GTGGGCGGGGGCAGGTGTGTGG	isomiR (orphan)	end-site
hsa-miR-1229-3p|0|-1	CTCTCACCACTGCCCTCCCACA	isomiR (orphan)	end-site
hsa-miR-1246|+1|0	ATGGATTTTTGGAGCAGG	isomiR	start-site
hsa-miR-1246|0|0	AATGGATTTTTGGAGCAGG	canonical miRNA
hsa-miR-1246|0|-1	AATGGATTTTTGGAGCAG	isomiR	end-site
hsa-miR-1247-5p|0|0	ACCCGTCCCGTTCGTCCCCGGA	canonical miRNA
hsa-miR-1247-5p|0|-1	ACCCGTCCCGTTCGTCCCCGG	isomiR	end-site
hsa-miR-1249-3p|0|0	ACGCCCTTCCCCCCCTTCTTCA	canonical miRNA
hsa-miR-1249-3p|0|-1	ACGCCCTTCCCCCCCTTCTTC	isomiR	end-site
hsa-miR-125a-3p|0|0	ACAGGTGAGGTTCTTGGGAGCC	canonical miRNA
hsa-miR-125a-3p|0|-1	ACAGGTGAGGTTCTTGGGAGC	isomiR	end-site
hsa-miR-125a-3p|0|-2	ACAGGTGAGGTTCTTGGGAG	isomiR	end-site
hsa-miR-125a-5p|+1|0	CCCTGAGACCCTTTAACCTGTGA	isomiR	start-site
hsa-miR-125a-5p|+1|-1	CCCTGAGACCCTTTAACCTGTG	isomiR	mixed: start-site + end-site
hsa-miR-125a-5p|+1|-2	CCCTGAGACCCTTTAACCTGT	isomiR	mixed: start-site + end-site
hsa-miR-125a-5p|0|0	TCCCTGAGACCCTTTAACCTGTGA	canonical miRNA
hsa-miR-125a-5p|0|-1	TCCCTGAGACCCTTTAACCTGTG	isomiR	end-site
hsa-miR-125a-5p|0|-1(+1U)	TCCCTGAGACCCTTTAACCTGTGT	isomiR	mixed: end-site + 3' non-templated addition
hsa-miR-125a-5p|0|-2	TCCCTGAGACCCTTTAACCTGT	isomiR	end-site
hsa-miR-125a-5p|0|-2(+1U)	TCCCTGAGACCCTTTAACCTGTT	isomiR	mixed: end-site + 3' non-templated addition
hsa-miR-125a-5p|0|-3	TCCCTGAGACCCTTTAACCTG	isomiR	end-site
hsa-miR-125a-5p|0|-4	TCCCTGAGACCCTTTAACCT	isomiR	end-site
hsa-miR-125a-5p|0|-5	TCCCTGAGACCCTTTAACC	isomiR	end-site
hsa-miR-125b-1-3p|0|0	ACGGGTTAGGCTCTTGGGAGCT	canonical miRNA
hsa-miR-125b-1-3p|0|-1	ACGGGTTAGGCTCTTGGGAGC	isomiR	end-site
hsa-miR-125b-1-3p|0|-2	ACGGGTTAGGCTCTTGGGAG	isomiR	end-site
hsa-miR-125b-1-3p|0|-2(+1U)	ACGGGTTAGGCTCTTGGGAGT	isomiR	mixed: end-site + 3' non-templated addition
hsa-miR-125b-2-3p|+2|+1	ACAAGTCAGGCTCTTGGGACC	isomiR	mixed: start-site + end-site
hsa-miR-125b-2-3p|+2|+2	ACAAGTCAGGCTCTTGGGACCT	isomiR	shifted
hsa-miR-125b-2-3p|+2|+2(+1U)	ACAAGTCAGGCTCTTGGGACCTT	isomiR	mixed: shifted + 3' non-templated addition
hsa-miR-125b-2-3p|+2|+2(+2U)	ACAAGTCAGGCTCTTGGGACCTTT	isomiR	mixed: shifted + 3' non-templated addition
hsa-miR-125b-2-3p|+2|0	ACAAGTCAGGCTCTTGGGAC	isomiR	start-site
hsa-miR-125b-2-3p|+2|0(+1U)	ACAAGTCAGGCTCTTGGGACT	isomiR	mixed: start-site + 3' non-templated addition
hsa-miR-125b-2-3p|+2|-1	ACAAGTCAGGCTCTTGGGA	isomiR	mixed: start-site + end-site
hsa-miR-125b-2-3p|0|0	TCACAAGTCAGGCTCTTGGGAC	canonical miRNA
hsa-miR-125b-2-3p|-1|0	ATCACAAGTCAGGCTCTTGGGAC	isomiR	start-site
hsa-miR-125b-2-3p|-1|-1	ATCACAAGTCAGGCTCTTGGGA	isomiR	shifted
hsa-miR-125b-5p|+1|0	CCCTGAGACCCTAACTTGTGA	isomiR	start-site
hsa-miR-125b-5p|+1|-1	CCCTGAGACCCTAACTTGTG	isomiR	mixed: start-site + end-site
hsa-miR-125b-5p|0|+1	TCCCTGAGACCCTAACTTGTGAG	isomiR	3' non-templated addition
hsa-miR-125b-5p|0|+1	TCCCTGAGACCCTAACTTGTGAT	isomiR	end-site
hsa-miR-125b-5p|0|0	TCCCTGAGACCCTAACTTGTGA	canonical miRNA
hsa-miR-125b-5p|0|-1	TCCCTGAGACCCTAACTTGTG	isomiR	end-site
hsa-miR-125b-5p|0|-1(+1U)	TCCCTGAGACCCTAACTTGTGT	isomiR	mixed: end-site + 3' non-templated addition
hsa-miR-125b-5p|0|-2	TCCCTGAGACCCTAACTTGT	isomiR	end-site
hsa-miR-125b-5p|0|-3	TCCCTGAGACCCTAACTTG	isomiR	end-site
hsa-miR-125b-5p|0|-4	TCCCTGAGACCCTAACTT	isomiR	end-site
hsa-miR-1260b|0|-1	ATCCCACCACTGCCACCA	isomiR (orphan)	end-site
hsa-miR-126-3p|+1|0	CGTACCGTGAGTAATAATGCG	isomiR	start-site
hsa-miR-126-3p|+1|0(+1U)	CGTACCGTGAGTAATAATGCGT	isomiR	mixed: start-site + 3' non-templated addition
hsa-miR-126-3p|+1|-1	CGTACCGTGAGTAATAATGC	isomiR	mixed: start-site + end-site
hsa-miR-126-3p|+1|-2	CGTACCGTGAGTAATAATG	isomiR	mixed: start-site + end-site
hsa-miR-126-3p|0|0	TCGTACCGTGAGTAATAATGCG	canonical miRNA
hsa-miR-126-3p|0|0(+1U)	TCGTACCGTGAGTAATAATGCGT	isomiR	3' non-templated addition
hsa-miR-126-3p|0|-1	TCGTACCGTGAGTAATAATGC	isomiR	end-site
hsa-miR-126-3p|0|-1(+1U)	TCGTACCGTGAGTAATAATGCT	isomiR	mixed: end-site + 3' non-templated addition
hsa-miR-126-3p|0|-2	TCGTACCGTGAGTAATAATG	isomiR	end-site
hsa-miR-126-3p|-1|0	CTCGTACCGTGAGTAATAATGCG	isomiR	start-site
hsa-miR-126-3p|-1|-1	CTCGTACCGTGAGTAATAATGC	isomiR	shifted
hsa-miR-126-5p|0|+1	CATTATTACTTTTGGTACGCGC	isomiR	end-site
hsa-miR-126-5p|0|0	CATTATTACTTTTGGTACGCG	canonical miRNA
hsa-miR-126-5p|0|0(+1U)	CATTATTACTTTTGGTACGCGT	isomiR	3' non-templated addition
hsa-miR-126-5p|0|-1	CATTATTACTTTTGGTACGC	isomiR	end-site
hsa-miR-126-5p|0|-2	CATTATTACTTTTGGTACG	isomiR	end-site
hsa-miR-1266-5p|0|0	CCTCAGGGCTGTAGAACAGGGCT	canonical miRNA
hsa-miR-1266-5p|0|0(+1U)	CCTCAGGGCTGTAGAACAGGGCTT	isomiR	3' non-templated addition
hsa-miR-1266-5p|0|-1	CCTCAGGGCTGTAGAACAGGGC	isomiR	end-site
hsa-miR-1266-5p|0|-2	CCTCAGGGCTGTAGAACAGGG	isomiR	end-site
hsa-miR-1268a|0|0	CGGGCGTGGTGGTGGGGG	canonical miRNA (without isomiR)
hsa-miR-1269a|+1|0	TGGACTGAGCCGTGCTACTGG	isomiR	start-site
hsa-miR-1269a|0|+1	CTGGACTGAGCCGTGCTACTGGC	isomiR	end-site
hsa-miR-1269a|0|0	CTGGACTGAGCCGTGCTACTGG	canonical miRNA
hsa-miR-1269a|0|0(+1U)	CTGGACTGAGCCGTGCTACTGGT	isomiR	3' non-templated addition
hsa-miR-1269a|0|0(+2U)	CTGGACTGAGCCGTGCTACTGGTT	isomiR	3' non-templated addition
hsa-miR-1269a|0|-1	CTGGACTGAGCCGTGCTACTG	isomiR	end-site
hsa-miR-1269a|0|-1(+1U)	CTGGACTGAGCCGTGCTACTGT	isomiR	mixed: end-site + 3' non-templated addition
hsa-miR-1269a|0|-1(+2U)	CTGGACTGAGCCGTGCTACTGTT	isomiR	mixed: end-site + 3' non-templated addition
hsa-miR-1269a|0|-1(+3U)	CTGGACTGAGCCGTGCTACTGTTT	isomiR	mixed: end-site + 3' non-templated addition
hsa-miR-1269a|0|-2	CTGGACTGAGCCGTGCTACT	isomiR	end-site
hsa-miR-1269a|0|-2(+1U)	CTGGACTGAGCCGTGCTACTT	isomiR	mixed: end-site + 3' non-templated addition
hsa-miR-1269a|0|-3	CTGGACTGAGCCGTGCTAC	isomiR	end-site
hsa-miR-1269a|0|-4	CTGGACTGAGCCGTGCTA	isomiR	end-site
hsa-miR-1269a|0|-4(+1U)	CTGGACTGAGCCGTGCTAT	isomiR	mixed: end-site + 3' non-templated addition
hsa-miR-1269a|-1|0	CCTGGACTGAGCCGTGCTACTGG	isomiR	start-site
hsa-miR-1269a|-1|-1	CCTGGACTGAGCCGTGCTACTG	isomiR	shifted
hsa-miR-1269a|-1|-2	CCTGGACTGAGCCGTGCTACT	isomiR	mixed: start-site + end-site
hsa-miR-1269a|-1|-3	CCTGGACTGAGCCGTGCTAC	isomiR	mixed: start-site + end-site
hsa-miR-1269b|0|0	CTGGACTGAGCCATGCTACTGG	canonical miRNA
hsa-miR-1269b|0|0(+1U)	CTGGACTGAGCCATGCTACTGGT	isomiR	3' non-templated addition
hsa-miR-1269b|0|-1	CTGGACTGAGCCATGCTACTG	isomiR	end-site
hsa-miR-1269b|0|-1(+1U)	CTGGACTGAGCCATGCTACTGT	isomiR	mixed: end-site + 3' non-templated addition
hsa-miR-1269b|0|-2	CTGGACTGAGCCATGCTACT	isomiR	end-site
hsa-miR-1269b|0|-3	CTGGACTGAGCCATGCTAC	isomiR	end-site
hsa-miR-1269b|0|-4	CTGGACTGAGCCATGCTA	isomiR	end-site
hsa-miR-1270|0|0	CTGGAGATATGGAAGAGCTGTGT	canonical miRNA (without isomiR)
hsa-miR-1271-5p|0|0	CTTGGCACCTAGCAAGCACTCA	canonical miRNA
hsa-miR-1271-5p|0|-1	CTTGGCACCTAGCAAGCACTC	isomiR	end-site
hsa-miR-1271-5p|0|-2	CTTGGCACCTAGCAAGCACT	isomiR	end-site
hsa-miR-1273h-5p|0|+1	CTGGGAGGTCAAGGCTGCAGTG	isomiR	end-site
hsa-miR-1273h-5p|0|0	CTGGGAGGTCAAGGCTGCAGT	canonical miRNA
hsa-miR-1273h-5p|0|-1	CTGGGAGGTCAAGGCTGCAG	isomiR	end-site
hsa-miR-127-3p|+1|+1(+1U)	CGGATCCGTCTGAGCTTGGCTGT	isomiR	mixed: shifted + 3' non-templated addition
hsa-miR-127-3p|+1|0	CGGATCCGTCTGAGCTTGGCT	isomiR	start-site
hsa-miR-127-3p|+1|-1	CGGATCCGTCTGAGCTTGGC	isomiR	mixed: start-site + end-site
hsa-miR-127-3p|0|+1	TCGGATCCGTCTGAGCTTGGCTG	isomiR	end-site
hsa-miR-127-3p|0|+1(+1U)	TCGGATCCGTCTGAGCTTGGCTGT	isomiR	mixed: end-site + 3' non-templated addition
hsa-miR-127-3p|0|0	TCGGATCCGTCTGAGCTTGGCT	canonical miRNA
hsa-miR-127-3p|0|0(+1U)	TCGGATCCGTCTGAGCTTGGCTT	isomiR	3' non-templated addition
hsa-miR-127-3p|0|0(+2U)	TCGGATCCGTCTGAGCTTGGCTTT	isomiR	3' non-templated addition
hsa-miR-127-3p|0|0(+3U)	TCGGATCCGTCTGAGCTTGGCTTTT	isomiR	3' non-templated addition
hsa-miR-127-3p|0|-1	TCGGATCCGTCTGAGCTTGGC	isomiR	end-site
hsa-miR-127-3p|0|-2	TCGGATCCGTCTGAGCTTGG	isomiR	end-site
hsa-miR-127-3p|0|-2(+1U)	TCGGATCCGTCTGAGCTTGGT	isomiR	mixed: end-site + 3' non-templated addition
hsa-miR-127-3p|0|-2(+2U)	TCGGATCCGTCTGAGCTTGGTT	isomiR	mixed: end-site + 3' non-templated addition
hsa-miR-127-3p|0|-3	TCGGATCCGTCTGAGCTTG	isomiR	end-site
hsa-miR-127-3p|-1|-1	ATCGGATCCGTCTGAGCTTGGC	isomiR	shifted
hsa-miR-127-3p|-1|-2	ATCGGATCCGTCTGAGCTTGG	isomiR	mixed: start-site + end-site
hsa-miR-127-3p|-1|-2(+1U)	ATCGGATCCGTCTGAGCTTGGT	isomiR	mixed: start-site + end-site + 3' non-templated addition
hsa-miR-1275|-2|0	GTGTGGGGGAGAGGCTGTC	isomiR (orphan)	start-site
hsa-miR-1275|-2|-1	GTGTGGGGGAGAGGCTGT	isomiR (orphan)	mixed: start-site + end-site
hsa-miR-127-5p|+1|-1	TGAAGCTCAGAGGGCTCTGA	isomiR	mixed: start-site + end-site
hsa-miR-127-5p|0|+1	CTGAAGCTCAGAGGGCTCTGATT	isomiR	end-site
hsa-miR-127-5p|0|0	CTGAAGCTCAGAGGGCTCTGAT	canonical miRNA
hsa-miR-127-5p|0|-1	CTGAAGCTCAGAGGGCTCTGA	isomiR	end-site
hsa-miR-127-5p|0|-2	CTGAAGCTCAGAGGGCTCTG	isomiR	end-site
hsa-miR-127-5p|-2|-1	TGCTGAAGCTCAGAGGGCTCTGA	isomiR	mixed: start-site + end-site
hsa-miR-128-1-5p|0|0	CGGGGCCGTAGCACTGTCTGAGA	canonical miRNA
hsa-miR-128-1-5p|0|-1	CGGGGCCGTAGCACTGTCTGAG	isomiR	end-site
hsa-miR-128-1-5p|0|-2	CGGGGCCGTAGCACTGTCTGA	isomiR	end-site
hsa-miR-128-1-5p|0|-3	CGGGGCCGTAGCACTGTCTG	isomiR	end-site
hsa-miR-128-3p|0|+1	TCACAGTGAACCGGTCTCTTTC	isomiR	3' non-templated addition
hsa-miR-128-3p|0|+1	TCACAGTGAACCGGTCTCTTTT	isomiR	end-site
hsa-miR-128-3p|0|+1(+1U)	TCACAGTGAACCGGTCTCTTTCT	isomiR	mixed: end-site + 3' non-templated addition
hsa-miR-128-3p|0|+2	TCACAGTGAACCGGTCTCTTTTT	isomiR	end-site
hsa-miR-128-3p|0|0	TCACAGTGAACCGGTCTCTTT	canonical miRNA
hsa-miR-128-3p|0|-1	TCACAGTGAACCGGTCTCTT	isomiR	end-site
hsa-miR-128-3p|0|-2	TCACAGTGAACCGGTCTCT	isomiR	end-site
hsa-miR-128-3p|0|-3	TCACAGTGAACCGGTCTC	isomiR	end-site
hsa-miR-1285-3p|0|0	TCTGGGCAACAAAGTGAGACCT	canonical miRNA
hsa-miR-1285-3p|0|-1	TCTGGGCAACAAAGTGAGACC	isomiR	end-site
hsa-miR-1285-5p|+1|0	ATCTCACTTTGTTGCCCAGG	isomiR (orphan)	start-site
hsa-miR-1285-5p|+1|-1	ATCTCACTTTGTTGCCCAG	isomiR (orphan)	mixed: start-site + end-site
hsa-miR-1285-5p|0|-1	GATCTCACTTTGTTGCCCAG	isomiR (orphan)	end-site
hsa-miR-1287-3p|0|0	CTCTAGCCACAGATGCAGTGAT	canonical miRNA
hsa-miR-1287-3p|0|-1	CTCTAGCCACAGATGCAGTGA	isomiR	end-site
hsa-miR-1287-5p|0|-4	TGCTGGATCAGTGGTTCG	isomiR (orphan)	end-site
hsa-miR-1288-3p|0|0	TGGACTGCCCTGATCTGGAGA	canonical miRNA (without isomiR)
hsa-miR-129-2-3p|0|0	AAGCCCTTACCCCAAAAAGCAT	canonical miRNA (without isomiR)
hsa-miR-1295a|0|0	TTAGGCCGCAGATCTGGGTGA	canonical miRNA (without isomiR)
hsa-miR-129-5p|0|0	CTTTTTGCGGTCTGGGCTTGC	canonical miRNA
hsa-miR-129-5p|0|-1	CTTTTTGCGGTCTGGGCTTG	isomiR	end-site
hsa-miR-129-5p|0|-1(+1U)	CTTTTTGCGGTCTGGGCTTGT	isomiR	mixed: end-site + 3' non-templated addition
hsa-miR-1296-5p|0|+1	TTAGGGCCCTGGCTCCATCTCCT	isomiR	end-site
hsa-miR-1296-5p|0|0	TTAGGGCCCTGGCTCCATCTCC	canonical miRNA
hsa-miR-1299|0|0	TTCTGGAATTCTGTGTGAGGGA	canonical miRNA
hsa-miR-1299|0|0(+1U)	TTCTGGAATTCTGTGTGAGGGAT	isomiR	3' non-templated addition
hsa-miR-1299|0|-1	TTCTGGAATTCTGTGTGAGGG	isomiR	end-site
hsa-miR-1299|0|-1(+1U)	TTCTGGAATTCTGTGTGAGGGT	isomiR	mixed: end-site + 3' non-templated addition
hsa-miR-1299|0|-2	TTCTGGAATTCTGTGTGAGG	isomiR	end-site
hsa-miR-1299|0|-2(+1U)	TTCTGGAATTCTGTGTGAGGT	isomiR	mixed: end-site + 3' non-templated addition
hsa-miR-1299|0|-3	TTCTGGAATTCTGTGTGAG	isomiR	end-site
hsa-miR-1301-3p|+1|+1	TGCAGCTGCCTGGGAGTGACTTCA	isomiR	shifted
hsa-miR-1301-3p|+1|0	TGCAGCTGCCTGGGAGTGACTTC	isomiR	start-site
hsa-miR-1301-3p|+1|-2	TGCAGCTGCCTGGGAGTGACT	isomiR	mixed: start-site + end-site
hsa-miR-1301-3p|+1|-3	TGCAGCTGCCTGGGAGTGAC	isomiR	mixed: start-site + end-site
hsa-miR-1301-3p|+3|+1	CAGCTGCCTGGGAGTGACTTCA	isomiR	mixed: start-site + end-site
hsa-miR-1301-3p|+3|+1(+1U)	CAGCTGCCTGGGAGTGACTTCAT	isomiR	mixed: start-site + end-site + 3' non-templated addition
hsa-miR-1301-3p|0|+1	TTGCAGCTGCCTGGGAGTGACTTCA	isomiR	end-site
hsa-miR-1301-3p|0|0	TTGCAGCTGCCTGGGAGTGACTTC	canonical miRNA
hsa-miR-1301-3p|0|0(+1U)	TTGCAGCTGCCTGGGAGTGACTTCT	isomiR	3' non-templated addition
hsa-miR-1301-3p|0|-1	TTGCAGCTGCCTGGGAGTGACTT	isomiR	end-site
hsa-miR-1301-3p|0|-1(+1U)	TTGCAGCTGCCTGGGAGTGACTTT	isomiR	mixed: end-site + 3' non-templated addition
hsa-miR-1301-3p|0|-2	TTGCAGCTGCCTGGGAGTGACT	isomiR	end-site
hsa-miR-1301-3p|0|-3	TTGCAGCTGCCTGGGAGTGAC	isomiR	end-site
hsa-miR-1301-3p|0|-4	TTGCAGCTGCCTGGGAGTGA	isomiR	end-site
hsa-miR-1301-3p|0|-4(+1U)	TTGCAGCTGCCTGGGAGTGAT	isomiR	mixed: end-site + 3' non-templated addition
hsa-miR-1301-3p|0|-5	TTGCAGCTGCCTGGGAGTG	isomiR	end-site
hsa-miR-1301-3p|0|-5(+1U)	TTGCAGCTGCCTGGGAGTGT	isomiR	mixed: end-site + 3' non-templated addition
hsa-miR-1306-3p|0|+3	ACGTTGGCTCTGGTGGTGATG	isomiR (orphan)	end-site
hsa-miR-1306-3p|0|+3(+1U)	ACGTTGGCTCTGGTGGTGATGT	isomiR (orphan)	mixed: end-site + 3' non-templated addition
hsa-miR-1306-3p|-1|+1	GACGTTGGCTCTGGTGGTGA	isomiR (orphan)	mixed: start-site + end-site
hsa-miR-1306-3p|-1|+2	GACGTTGGCTCTGGTGGTGAT	isomiR (orphan)	mixed: start-site + end-site
hsa-miR-1306-5p|0|0	CCACCTCCCCTGCAAACGTCCA	canonical miRNA
hsa-miR-1306-5p|0|0(+1U)	CCACCTCCCCTGCAAACGTCCAT	isomiR	3' non-templated addition
hsa-miR-1306-5p|0|-1	CCACCTCCCCTGCAAACGTCC	isomiR	end-site
hsa-miR-1306-5p|0|-2	CCACCTCCCCTGCAAACGTC	isomiR	end-site
hsa-miR-1306-5p|0|-3	CCACCTCCCCTGCAAACGT	isomiR	end-site
hsa-miR-1307-3p|+1|+1	CTCGGCGTGGCGTCGGTCGTGG	isomiR	shifted
hsa-miR-1307-3p|+1|+2	CTCGGCGTGGCGTCGGTCGTGGT	isomiR	mixed: start-site + end-site
hsa-miR-1307-3p|+1|+2(+1U)	CTCGGCGTGGCGTCGGTCGTGGTT	isomiR	mixed: start-site + end-site + 3' non-templated addition
hsa-miR-1307-3p|+1|+2(+2U)	CTCGGCGTGGCGTCGGTCGTGGTTT	isomiR	mixed: start-site + end-site + 3' non-templated addition
hsa-miR-1307-3p|+1|+3	CTCGGCGTGGCGTCGGTCGTGGTA	isomiR	mixed: start-site + end-site
hsa-miR-1307-3p|+1|+3(+1U)	CTCGGCGTGGCGTCGGTCGTGGTAT	isomiR	mixed: start-site + end-site + 3' non-templated addition
hsa-miR-1307-3p|+1|0	CTCGGCGTGGCGTCGGTCGTG	isomiR	start-site
hsa-miR-1307-3p|+1|0(+1U)	CTCGGCGTGGCGTCGGTCGTGT	isomiR	mixed: start-site + 3' non-templated addition
hsa-miR-1307-3p|+1|0(+2U)	CTCGGCGTGGCGTCGGTCGTGTT	isomiR	mixed: start-site + 3' non-templated addition
hsa-miR-1307-3p|+1|-1	CTCGGCGTGGCGTCGGTCGT	isomiR	mixed: start-site + end-site
hsa-miR-1307-3p|+1|-2	CTCGGCGTGGCGTCGGTCG	isomiR	mixed: start-site + end-site
hsa-miR-1307-3p|+2|+1	TCGGCGTGGCGTCGGTCGTGG	isomiR	mixed: start-site + end-site
hsa-miR-1307-3p|+2|+2	TCGGCGTGGCGTCGGTCGTGGT	isomiR	shifted
hsa-miR-1307-3p|0|+1	ACTCGGCGTGGCGTCGGTCGTGG	isomiR	end-site
hsa-miR-1307-3p|0|+2	ACTCGGCGTGGCGTCGGTCGTGGT	isomiR	end-site
hsa-miR-1307-3p|0|+2(+1U)	ACTCGGCGTGGCGTCGGTCGTGGTT	isomiR	mixed: end-site + 3' non-templated addition
hsa-miR-1307-3p|0|+3	ACTCGGCGTGGCGTCGGTCGTGGTA	isomiR	end-site
hsa-miR-1307-3p|0|+3(+1U)	ACTCGGCGTGGCGTCGGTCGTGGTAT	isomiR	mixed: end-site + 3' non-templated addition
hsa-miR-1307-3p|0|0	ACTCGGCGTGGCGTCGGTCGTG	canonical miRNA
hsa-miR-1307-3p|0|0(+1U)	ACTCGGCGTGGCGTCGGTCGTGT	isomiR	3' non-templated addition
hsa-miR-1307-3p|0|-1	ACTCGGCGTGGCGTCGGTCGT	isomiR	end-site
hsa-miR-1307-3p|0|-1(+1U)	ACTCGGCGTGGCGTCGGTCGTT	isomiR	mixed: end-site + 3' non-templated addition
hsa-miR-1307-3p|0|-2	ACTCGGCGTGGCGTCGGTCG	isomiR	end-site
hsa-miR-1307-3p|0|-4	ACTCGGCGTGGCGTCGGT	isomiR	end-site
hsa-miR-130a-3p|0|+1	CAGTGCAATGTTAAAAGGGCATT	isomiR	end-site
hsa-miR-130a-3p|0|0	CAGTGCAATGTTAAAAGGGCAT	canonical miRNA
hsa-miR-130a-3p|0|-1	CAGTGCAATGTTAAAAGGGCA	isomiR	end-site
hsa-miR-130a-3p|0|-2	CAGTGCAATGTTAAAAGGGC	isomiR	end-site
hsa-miR-130a-3p|0|-3	CAGTGCAATGTTAAAAGGG	isomiR	end-site
hsa-miR-130a-3p|0|-4	CAGTGCAATGTTAAAAGG	isomiR	end-site
hsa-miR-130a-3p|-1|0	GCAGTGCAATGTTAAAAGGGCAT	isomiR	start-site
hsa-miR-130a-5p|0|0	GCTCTTTTCACATTGTGCTACT	canonical miRNA (without isomiR)
hsa-miR-130b-3p|0|0	CAGTGCAATGATGAAAGGGCAT	canonical mIRNA
hsa-miR-130b-3p|0|0(+1U)	CAGTGCAATGATGAAAGGGCATT	isomiR	3' non-templated addition
hsa-miR-130b-3p|0|-1	CAGTGCAATGATGAAAGGGCA	isomiR	end-site
hsa-miR-130b-3p|0|-2	CAGTGCAATGATGAAAGGGC	isomiR	end-site
hsa-miR-130b-3p|0|-3	CAGTGCAATGATGAAAGGG	isomiR	end-site
hsa-miR-130b-5p|0|+1	ACTCTTTCCCTGTTGCACTACT	isomiR	end-site
hsa-miR-130b-5p|0|0	ACTCTTTCCCTGTTGCACTAC	canonical miRNA
hsa-miR-130b-5p|0|-1	ACTCTTTCCCTGTTGCACTA	isomiR	end-site
hsa-miR-130b-5p|0|-2	ACTCTTTCCCTGTTGCACT	isomiR	end-site
hsa-miR-1323|0|0	TCAAAACTGAGGGGCATTTTCT	canonical miRNA (without isomiR)
hsa-miR-132-3p|+1|0	AACAGTCTACAGCCATGGTCG	isomiR	start-site
hsa-miR-132-3p|+1|0(+1U)	AACAGTCTACAGCCATGGTCGT	isomiR	mixed: start-site + 3' non-templated addition
hsa-miR-132-3p|+1|-1	AACAGTCTACAGCCATGGTC	isomiR	mixed: start-site + end-site
hsa-miR-132-3p|+2|0(+1U)	ACAGTCTACAGCCATGGTCGT	isomiR	mixed: start-site + 3' non-templated addition
hsa-miR-132-3p|+2|0(+2U)	ACAGTCTACAGCCATGGTCGTT	isomiR	mixed: start-site + 3' non-templated addition
hsa-miR-132-3p|0|0	TAACAGTCTACAGCCATGGTCG	canonical miRNA
hsa-miR-132-3p|0|0(+1U)	TAACAGTCTACAGCCATGGTCGT	isomiR	3' non-templated addition
hsa-miR-132-3p|0|0(+2U)	TAACAGTCTACAGCCATGGTCGTT	isomiR	3' non-templated addition
hsa-miR-132-3p|0|-1	TAACAGTCTACAGCCATGGTC	isomiR	end-site
hsa-miR-132-3p|0|-1(+1U)	TAACAGTCTACAGCCATGGTCT	isomiR	mixed: end-site + 3' non-templated addition
hsa-miR-132-3p|0|-2	TAACAGTCTACAGCCATGGT	isomiR	end-site
hsa-miR-132-3p|0|-3	TAACAGTCTACAGCCATGG	isomiR	end-site
hsa-miR-132-3p|0|-4	TAACAGTCTACAGCCATG	isomiR	end-site
hsa-miR-132-5p|+20|+16	CTGTGGGAACTGGAGGTA	isomiR (orphan)	mixed: start-site + end-site
hsa-miR-133a-3p|+1|+1	TTGGTCCCCTTCAACCAGCTGT	isomiR	shifted
hsa-miR-133a-3p|0|+1	TTTGGTCCCCTTCAACCAGCTGT	isomiR	end-site
hsa-miR-133a-3p|0|0	TTTGGTCCCCTTCAACCAGCTG	canonical miRNA
hsa-miR-1343-3p|0|0	CTCCTGGGGCCCGCACTCTCGC	canonical miRNA
hsa-miR-1343-3p|0|-1	CTCCTGGGGCCCGCACTCTCG	isomiR	end-site
hsa-miR-134-5p|0|0	TGTGACTGGTTGACCAGAGGGG	canonical miRNA
hsa-miR-134-5p|0|0(+1U)	TGTGACTGGTTGACCAGAGGGGT	isomiR	3' non-templated addition
hsa-miR-134-5p|0|0(+2U)	TGTGACTGGTTGACCAGAGGGGTT	isomiR	3' non-templated addition
hsa-miR-134-5p|0|-1	TGTGACTGGTTGACCAGAGGG	isomiR	end-site
hsa-miR-134-5p|0|-1(+1U)	TGTGACTGGTTGACCAGAGGGT	isomiR	mixed: end-site + 3' non-templated addition
hsa-miR-134-5p|0|-1(+2U)	TGTGACTGGTTGACCAGAGGGTT	isomiR	mixed: end-site + 3' non-templated addition
hsa-miR-134-5p|0|-2	TGTGACTGGTTGACCAGAGG	isomiR	end-site
hsa-miR-134-5p|0|-2(+1U)	TGTGACTGGTTGACCAGAGGT	isomiR	mixed: end-site + 3' non-templated addition
hsa-miR-134-5p|0|-3	TGTGACTGGTTGACCAGAG	isomiR	end-site
hsa-miR-134-5p|0|-3(+1U)	TGTGACTGGTTGACCAGAGT	isomiR	mixed: end-site + 3' non-templated addition
hsa-miR-135b-5p|0|0	TATGGCTTTTCATTCCTATGTGA	canonical miRNA
hsa-miR-135b-5p|0|-1	TATGGCTTTTCATTCCTATGTG	isomiR	end-site
hsa-miR-135b-5p|0|-1(+1U)	TATGGCTTTTCATTCCTATGTGT	isomiR	mixed: end-site + 3' non-templated addition
hsa-miR-135b-5p|0|-2	TATGGCTTTTCATTCCTATGT	isomiR	end-site
hsa-miR-136-3p|+1|0	ATCATCGTCTCAAATGAGTCT	isomiR (orphan)	start-site
hsa-miR-136-5p|0|0	ACTCCATTTGTTTTGATGATGGA	canonical miRNA
hsa-miR-136-5p|0|-1	ACTCCATTTGTTTTGATGATGG	isomiR	end-site
hsa-miR-136-5p|0|-2	ACTCCATTTGTTTTGATGATG	isomiR	end-site
hsa-miR-137-3p|0|0	TTATTGCTTAAGAATACGCGTAG	canonical miRNA (without isomiR)
hsa-miR-138-1-3p|0|-1	GCTACTTCACAACACCAGGGC	isomiR (orphan)	end-site
hsa-miR-138-1-3p|-2|-1	CGGCTACTTCACAACACCAGGGC	isomiR (orphan)	mixed: start-site + end-site
hsa-miR-138-5p|0|+1	AGCTGGTGTTGTGAATCAGGCCGT	isomiR	3' non-templated addition
hsa-miR-138-5p|0|+1	AGCTGGTGTTGTGAATCAGGCCGA	isomiR	end-site
hsa-miR-138-5p|0|+2	AGCTGGTGTTGTGAATCAGGCCGTT	isomiR	3' non-templated addition
hsa-miR-138-5p|0|0	AGCTGGTGTTGTGAATCAGGCCG	canonical miRNA
hsa-miR-138-5p|0|-1	AGCTGGTGTTGTGAATCAGGCC	isomiR	end-site
hsa-miR-138-5p|0|-2	AGCTGGTGTTGTGAATCAGGC	isomiR	end-site
hsa-miR-138-5p|0|-3	AGCTGGTGTTGTGAATCAGG	isomiR	end-site
hsa-miR-139-3p|0|0	TGGAGACGCGGCCCTGTTGGAGT	canonical miRNA
hsa-miR-139-3p|0|-1	TGGAGACGCGGCCCTGTTGGAG	isomiR	end-site
hsa-miR-139-3p|0|-2	TGGAGACGCGGCCCTGTTGGA	isomiR	end-site
hsa-miR-139-3p|0|-3	TGGAGACGCGGCCCTGTTGG	isomiR	end-site
hsa-miR-139-5p|0|0	TCTACAGTGCACGTGTCTCCAGT	canonical miRNA
hsa-miR-139-5p|0|-1	TCTACAGTGCACGTGTCTCCAG	isomiR	end-site
hsa-miR-139-5p|0|-2	TCTACAGTGCACGTGTCTCCA	isomiR	end-site
hsa-miR-139-5p|0|-3	TCTACAGTGCACGTGTCTCC	isomiR	end-site
hsa-miR-1-3p|0|0	TGGAATGTAAAGAAGTATGTAT	canonical miRNA (without isomiR)
hsa-miR-140-3p|+1|+1	ACCACAGGGTAGAACCACGGA	isomiR	shifted
hsa-miR-140-3p|+1|+1(+1U)	ACCACAGGGTAGAACCACGGAT	isomiR	mixed: shifted + 3' non-templated addition
hsa-miR-140-3p|+1|+1(+2U)	ACCACAGGGTAGAACCACGGATT	isomiR	mixed: shifted + 3' non-templated addition
hsa-miR-140-3p|+1|+2	ACCACAGGGTAGAACCACGGAC	isomiR	mixed: start-site + end-site
hsa-miR-140-3p|+1|+2(+1U)	ACCACAGGGTAGAACCACGGACT	isomiR	mixed: start-site + end-site + 3' non-templated addition
hsa-miR-140-3p|+1|+2(+2U)	ACCACAGGGTAGAACCACGGACTT	isomiR	mixed: start-site + end-site + 3' non-templated addition
hsa-miR-140-3p|+1|+2(+3U)	ACCACAGGGTAGAACCACGGACTTT	isomiR	mixed: start-site + end-site + 3' non-templated addition
hsa-miR-140-3p|+1|+3	ACCACAGGGTAGAACCACGGACA	isomiR	mixed: start-site + end-site
hsa-miR-140-3p|+1|+3(+1U)	ACCACAGGGTAGAACCACGGACAT	isomiR	mixed: start-site + end-site + 3' non-templated addition
hsa-miR-140-3p|+1|+3(+2U)	ACCACAGGGTAGAACCACGGACATT	isomiR	mixed: start-site + end-site + 3' non-templated addition
hsa-miR-140-3p|+1|+4	ACCACAGGGTAGAACCACGGACAG	isomiR	mixed: start-site + end-site
hsa-miR-140-3p|+1|+4(+1U)	ACCACAGGGTAGAACCACGGACAGT	isomiR	mixed: start-site + end-site + 3' non-templated addition
hsa-miR-140-3p|+1|0	ACCACAGGGTAGAACCACGG	isomiR	start-site
hsa-miR-140-3p|+1|0(+1U)	ACCACAGGGTAGAACCACGGT	isomiR	mixed: start-site + 3' non-templated addition
hsa-miR-140-3p|+1|-1	ACCACAGGGTAGAACCACG	isomiR	mixed: start-site + end-site
hsa-miR-140-3p|+1|-2	ACCACAGGGTAGAACCAC	isomiR	mixed: start-site + end-site
hsa-miR-140-3p|+2|+1	CCACAGGGTAGAACCACGGA	isomiR	mixed: start-site + end-site
hsa-miR-140-3p|+2|+1(+1U)	CCACAGGGTAGAACCACGGAT	isomiR	mixed: start-site + end-site + 3' non-templated addition
hsa-miR-140-3p|+2|+2	CCACAGGGTAGAACCACGGAC	isomiR	shifted
hsa-miR-140-3p|+2|+2(+1U)	CCACAGGGTAGAACCACGGACT	isomiR	mixed: shifted + 3' non-templated addition
hsa-miR-140-3p|+2|+3	CCACAGGGTAGAACCACGGACA	isomiR	mixed: start-site + end-site
hsa-miR-140-3p|+2|+3(+1U)	CCACAGGGTAGAACCACGGACAT	isomiR	mixed: start-site + end-site + 3' non-templated addition
hsa-miR-140-3p|+2|0	CCACAGGGTAGAACCACGG	isomiR	start-site
hsa-miR-140-3p|+2|-1	CCACAGGGTAGAACCACG	isomiR	mixed: start-site + end-site
hsa-miR-140-3p|+3|+1	CACAGGGTAGAACCACGGA	isomiR	mixed: start-site + end-site
hsa-miR-140-3p|+3|+2	CACAGGGTAGAACCACGGAC	isomiR	mixed: start-site + end-site
hsa-miR-140-3p|+3|+2(+1U)	CACAGGGTAGAACCACGGACT	isomiR	mixed: start-site + end-site + 3' non-templated addition
hsa-miR-140-3p|+3|+3	CACAGGGTAGAACCACGGACA	isomiR	shifted
hsa-miR-140-3p|+4|+2	ACAGGGTAGAACCACGGAC	isomiR	mixed: start-site + end-site
hsa-miR-140-3p|+4|+3	ACAGGGTAGAACCACGGACA	isomiR	mixed: start-site + end-site
hsa-miR-140-3p|+4|+4	ACAGGGTAGAACCACGGACAG	isomiR	shifted
hsa-miR-140-3p|+4|+5	ACAGGGTAGAACCACGGACAGG	isomiR	mixed: start-site + end-site
hsa-miR-140-3p|+5|+2	CAGGGTAGAACCACGGAC	isomiR	mixed: start-site + end-site
hsa-miR-140-3p|+5|+3	CAGGGTAGAACCACGGACA	isomiR	mixed: start-site + end-site
hsa-miR-140-3p|0|+1	TACCACAGGGTAGAACCACGGA	isomiR	end-site
hsa-miR-140-3p|0|+1(+1U)	TACCACAGGGTAGAACCACGGAT	isomiR	mixed: end-site + 3' non-templated addition
hsa-miR-140-3p|0|+1(+2U)	TACCACAGGGTAGAACCACGGATT	isomiR	mixed: end-site + 3' non-templated addition
hsa-miR-140-3p|0|+2	TACCACAGGGTAGAACCACGGAC	isomiR	end-site
hsa-miR-140-3p|0|+2(+1U)	TACCACAGGGTAGAACCACGGACT	isomiR	mixed: end-site + 3' non-templated addition
hsa-miR-140-3p|0|+2(+2U)	TACCACAGGGTAGAACCACGGACTT	isomiR	mixed: end-site + 3' non-templated addition
hsa-miR-140-3p|0|+3	TACCACAGGGTAGAACCACGGACA	isomiR	end-site
hsa-miR-140-3p|0|+3(+1U)	TACCACAGGGTAGAACCACGGACAT	isomiR	mixed: end-site + 3' non-templated addition
hsa-miR-140-3p|0|+4	TACCACAGGGTAGAACCACGGACAG	isomiR	end-site
hsa-miR-140-3p|0|0	TACCACAGGGTAGAACCACGG	canonical miRNA
hsa-miR-140-3p|0|0(+1U)	TACCACAGGGTAGAACCACGGT	isomiR	3' non-templated addition
hsa-miR-140-3p|0|-1	TACCACAGGGTAGAACCACG	isomiR	end-site
hsa-miR-140-3p|0|-1(+1U)	TACCACAGGGTAGAACCACGT	isomiR	mixed: end-site + 3' non-templated addition
hsa-miR-140-3p|0|-2	TACCACAGGGTAGAACCAC	isomiR	end-site
hsa-miR-140-5p|0|+1	CAGTGGTTTTACCCTATGGTAGG	isomiR	end-site
hsa-miR-140-5p|0|0	CAGTGGTTTTACCCTATGGTAG	canonical miRNA
hsa-miR-140-5p|0|0(+1U)	CAGTGGTTTTACCCTATGGTAGT	isomiR	3' non-templated addition
hsa-miR-140-5p|0|-1	CAGTGGTTTTACCCTATGGTA	isomiR	end-site
hsa-miR-140-5p|0|-2	CAGTGGTTTTACCCTATGGT	isomiR	end-site
hsa-miR-141-3p|0|+1	TAACACTGTCTGGTAAAGATGGC	isomiR	end-site
hsa-miR-141-3p|0|0	TAACACTGTCTGGTAAAGATGG	canonical miRNA
hsa-miR-141-3p|0|-1	TAACACTGTCTGGTAAAGATG	isomiR	end-site
hsa-miR-141-5p|0|0	CATCTTCCAGTACAGTGTTGGA	canonical miRNA
hsa-miR-141-5p|0|-1	CATCTTCCAGTACAGTGTTGG	isomiR	end-site
hsa-miR-142-3p|+1|+1	GTAGTGTTTCCTACTTTATGGAT	isomiR	shifted
hsa-miR-142-3p|+1|+1(+1U)	GTAGTGTTTCCTACTTTATGGATT	isomiR	mixed: shifted + 3' non-templated addition
hsa-miR-142-3p|+1|0	GTAGTGTTTCCTACTTTATGGA	isomiR	start-site
hsa-miR-142-3p|+1|-1	GTAGTGTTTCCTACTTTATGG	isomiR	mixed: start-site + end-site
hsa-miR-142-3p|+1|-1(+1U)	GTAGTGTTTCCTACTTTATGGT	isomiR	mixed: start-site + end-site + 3' non-templated addition
hsa-miR-142-3p|+1|-2	GTAGTGTTTCCTACTTTATG	isomiR	mixed: start-site + end-site
hsa-miR-142-3p|+1|-2(+1U)	GTAGTGTTTCCTACTTTATGT	isomiR	mixed: start-site + end-site + 3' non-templated addition
hsa-miR-142-3p|+1|-3	GTAGTGTTTCCTACTTTAT	isomiR	mixed: start-site + end-site
hsa-miR-142-3p|+2|0	TAGTGTTTCCTACTTTATGGA	isomiR	start-site
hsa-miR-142-3p|+2|-1	TAGTGTTTCCTACTTTATGG	isomiR	mixed: start-site + end-site
hsa-miR-142-3p|+3|+2	AGTGTTTCCTACTTTATGGATG	isomiR	mixed: start-site + end-site
hsa-miR-142-3p|+3|-1	AGTGTTTCCTACTTTATGG	isomiR	mixed: start-site + end-site
hsa-miR-142-3p|0|0	TGTAGTGTTTCCTACTTTATGGA	canonical miRNA
hsa-miR-142-3p|0|-1	TGTAGTGTTTCCTACTTTATGG	isomiR	end-site
hsa-miR-142-3p|0|-1(+1U)	TGTAGTGTTTCCTACTTTATGGT	isomiR	mixed: end-site + 3' non-templated addition
hsa-miR-142-3p|0|-2	TGTAGTGTTTCCTACTTTATG	isomiR	end-site
hsa-miR-142-3p|0|-5	TGTAGTGTTTCCTACTTT	isomiR	end-site
hsa-miR-142-5p|0|0	CATAAAGTAGAAAGCACTACT	canonical miRNA
hsa-miR-142-5p|0|-1	CATAAAGTAGAAAGCACTAC	isomiR	end-site
hsa-miR-142-5p|0|-2	CATAAAGTAGAAAGCACTA	isomiR	end-site
hsa-miR-142-5p|0|-3	CATAAAGTAGAAAGCACT	isomiR	end-site
hsa-miR-142-5p|-1|-3	CCATAAAGTAGAAAGCACT	isomiR	mixed: start-site + end-site
hsa-miR-142-5p|-2|-1	CCCATAAAGTAGAAAGCACTAC	isomiR	mixed: start-site + end-site
hsa-miR-142-5p|-2|-2	CCCATAAAGTAGAAAGCACTA	isomiR	shifted
hsa-miR-142-5p|-2|-2(+1U)	CCCATAAAGTAGAAAGCACTAT	isomiR	mixed: shifted + 3' non-templated addition
hsa-miR-142-5p|-2|-3	CCCATAAAGTAGAAAGCACT	isomiR	mixed: start-site + end-site
hsa-miR-142-5p|-2|-4	CCCATAAAGTAGAAAGCAC	isomiR	mixed: start-site + end-site
hsa-miR-142-5p|-2|-5	CCCATAAAGTAGAAAGCA	isomiR	mixed: start-site + end-site
hsa-miR-143-3p|+1|0	GAGATGAAGCACTGTAGCTC	isomiR	start-site
hsa-miR-143-3p|+1|0(+1U)	GAGATGAAGCACTGTAGCTCT	isomiR	mixed: start-site + 3' non-templated addition
hsa-miR-143-3p|+1|-1	GAGATGAAGCACTGTAGCT	isomiR	mixed: start-site + end-site
hsa-miR-143-3p|+2|0(+1U)	AGATGAAGCACTGTAGCTCT	isomiR	mixed: start-site + 3' non-templated addition
hsa-miR-143-3p|+2|-1	AGATGAAGCACTGTAGCT	isomiR	mixed: start-site + end-site
hsa-miR-143-3p|+3|+1	GATGAAGCACTGTAGCTCA	isomiR	mixed: start-site + end-site
hsa-miR-143-3p|+3|0	GATGAAGCACTGTAGCTC	isomiR	start-site
hsa-miR-143-3p|+3|0(+1U)	GATGAAGCACTGTAGCTCT	isomiR	mixed: start-site + 3' non-templated addition
hsa-miR-143-3p|+3|0(+2U)	GATGAAGCACTGTAGCTCTT	isomiR	mixed: start-site + 3' non-templated addition
hsa-miR-143-3p|+3|0(+3U)	GATGAAGCACTGTAGCTCTTT	isomiR	mixed: start-site + 3' non-templated addition
hsa-miR-143-3p|+4|+1	ATGAAGCACTGTAGCTCA	isomiR	mixed: start-site + end-site
hsa-miR-143-3p|0|+1	TGAGATGAAGCACTGTAGCTCA	isomiR	end-site
hsa-miR-143-3p|0|+1(+1U)	TGAGATGAAGCACTGTAGCTCAT	isomiR	mixed: end-site + 3' non-templated addition
hsa-miR-143-3p|0|+1(+2U)	TGAGATGAAGCACTGTAGCTCATT	isomiR	mixed: end-site + 3' non-templated addition
hsa-miR-143-3p|0|+2	TGAGATGAAGCACTGTAGCTCAG	isomiR	end-site
hsa-miR-143-3p|0|0	TGAGATGAAGCACTGTAGCTC	canonical miRNA
hsa-miR-143-3p|0|0(+1U)	TGAGATGAAGCACTGTAGCTCT	isomiR	3' non-templated addition
hsa-miR-143-3p|0|0(+2U)	TGAGATGAAGCACTGTAGCTCTT	isomiR	3' non-templated addition
hsa-miR-143-3p|0|0(+3U)	TGAGATGAAGCACTGTAGCTCTTT	isomiR	3' non-templated addition
hsa-miR-143-3p|0|0(+4U)	TGAGATGAAGCACTGTAGCTCTTTT	isomiR	3' non-templated addition
hsa-miR-143-3p|0|-1	TGAGATGAAGCACTGTAGCT	isomiR	end-site
hsa-miR-143-3p|0|-1(+1U)	TGAGATGAAGCACTGTAGCTT	isomiR	mixed: end-site + 3' non-templated addition
hsa-miR-143-3p|0|-1(+2U)	TGAGATGAAGCACTGTAGCTTT	isomiR	mixed: end-site + 3' non-templated addition
hsa-miR-143-3p|0|-1(+3U)	TGAGATGAAGCACTGTAGCTTTT	isomiR	mixed: end-site + 3' non-templated addition
hsa-miR-143-3p|0|-2	TGAGATGAAGCACTGTAGC	isomiR	end-site
hsa-miR-143-3p|0|-3	TGAGATGAAGCACTGTAG	isomiR	end-site
hsa-miR-143-3p|0|-3(+1U)	TGAGATGAAGCACTGTAGT	isomiR	mixed: end-site + 3' non-templated addition
hsa-miR-143-3p|0|-3(+2U)	TGAGATGAAGCACTGTAGTT	isomiR	mixed: end-site + 3' non-templated addition
hsa-miR-143-3p|0|-3(+3U)	TGAGATGAAGCACTGTAGTTT	isomiR	mixed: end-site + 3' non-templated addition
hsa-miR-143-3p|-1|+1	CTGAGATGAAGCACTGTAGCTCA	isomiR	mixed: start-site + end-site
hsa-miR-143-3p|-1|0	CTGAGATGAAGCACTGTAGCTC	isomiR	start-site
hsa-miR-143-3p|-1|0(+1U)	CTGAGATGAAGCACTGTAGCTCT	isomiR	mixed: start-site + 3' non-templated addition
hsa-miR-143-3p|-1|0(+2U)	CTGAGATGAAGCACTGTAGCTCTT	isomiR	mixed: start-site + 3' non-templated addition
hsa-miR-143-3p|-1|-1	CTGAGATGAAGCACTGTAGCT	isomiR	shifted
hsa-miR-143-3p|-1|-1(+1U)	CTGAGATGAAGCACTGTAGCTT	isomiR	mixed: shifted + 3' non-templated addition
hsa-miR-143-3p|-1|-2	CTGAGATGAAGCACTGTAGC	isomiR	mixed: start-site + end-site
hsa-miR-143-3p|-1|-3	CTGAGATGAAGCACTGTAG	isomiR	mixed: start-site + end-site
hsa-miR-143-3p|-2|-2	TCTGAGATGAAGCACTGTAGC	isomiR	shifted
hsa-miR-143-3p|-2|-3	TCTGAGATGAAGCACTGTAG	isomiR	mixed: start-site + end-site
hsa-miR-143-5p|0|-1	GGTGCAGTGCTGCATCTCTGG	isomiR (orphan)	end-site
hsa-miR-144-3p|0|0	TACAGTATAGATGATGTACT	canonical miRNA (without isomiR)
hsa-miR-144-5p|+1|0	GATATCATCATATACTGTAAG	isomiR	start-site
hsa-miR-144-5p|0|+1	GGATATCATCATATACTGTAAGT	isomiR	end-site
hsa-miR-144-5p|0|0	GGATATCATCATATACTGTAAG	canonical miRNA
hsa-miR-145-3p|+2|+1	ATTCCTGGAAATACTGTTCTT	isomiR	mixed: start-site + end-site
hsa-miR-145-3p|+2|0	ATTCCTGGAAATACTGTTCT	isomiR	start-site
hsa-miR-145-3p|0|0	GGATTCCTGGAAATACTGTTCT	canonical miRNA
hsa-miR-145-5p|+1|0	TCCAGTTTTCCCAGGAATCCCT	isomiR	start-site
hsa-miR-145-5p|+5|0	GTTTTCCCAGGAATCCCT	isomiR	start-site
hsa-miR-145-5p|0|+1	GTCCAGTTTTCCCAGGAATCCCTT	isomiR	end-site
hsa-miR-145-5p|0|+1(+1U)	GTCCAGTTTTCCCAGGAATCCCTTT	isomiR	mixed: end-site + 3' non-templated addition
hsa-miR-145-5p|0|0	GTCCAGTTTTCCCAGGAATCCCT	canonical miRNA
hsa-miR-145-5p|0|-1	GTCCAGTTTTCCCAGGAATCCC	isomiR	end-site
hsa-miR-145-5p|0|-2	GTCCAGTTTTCCCAGGAATCC	isomiR	end-site
hsa-miR-145-5p|0|-2(+1U)	GTCCAGTTTTCCCAGGAATCCT	isomiR	mixed: end-site + 3' non-templated addition
hsa-miR-145-5p|0|-3	GTCCAGTTTTCCCAGGAATC	isomiR	end-site
hsa-miR-145-5p|0|-3(+1U)	GTCCAGTTTTCCCAGGAATCT	isomiR	mixed: end-site + 3' non-templated addition
hsa-miR-145-5p|0|-4	GTCCAGTTTTCCCAGGAAT	isomiR	end-site
hsa-miR-145-5p|0|-5	GTCCAGTTTTCCCAGGAA	isomiR	end-site
hsa-miR-1468-5p|0|+1	CTCCGTTTGCCTGTTTCGCTGA	isomiR (orphan)	end-site
hsa-miR-146a-3p|+1|0	CTCTGAAATTCAGTTCTTCAG	isomiR (orphan)	start-site
hsa-miR-146a-3p|+1|0(+1U)	CTCTGAAATTCAGTTCTTCAGT	isomiR (orphan)	mixed: start-site + 3' non-templated addition
hsa-miR-146a-3p|0|-1	CCTCTGAAATTCAGTTCTTCA	isomiR (orphan)	end-site
hsa-miR-146a-3p|-1|-1	ACCTCTGAAATTCAGTTCTTCA	isomiR (orphan)	shifted
hsa-miR-146a-3p|-1|-2	ACCTCTGAAATTCAGTTCTTC	isomiR (orphan)	mixed: start-site + end-site
hsa-miR-146a-3p|-2|-1	GACCTCTGAAATTCAGTTCTTCA	isomiR (orphan)	mixed: start-site + end-site
hsa-miR-146a-3p|-2|-2	GACCTCTGAAATTCAGTTCTTC	isomiR (orphan)	shifted
hsa-miR-146a-3p|-2|-3	GACCTCTGAAATTCAGTTCTT	isomiR (orphan)	mixed: start-site + end-site
hsa-miR-146a-3p|-2|-4	GACCTCTGAAATTCAGTTCT	isomiR (orphan)	mixed: start-site + end-site
hsa-miR-146a-5p|+1|+1	GAGAACTGAATTCCATGGGTTG	isomiR	shifted
hsa-miR-146a-5p|+1|+2	GAGAACTGAATTCCATGGGTTGT	isomiR	mixed: start-site + end-site
hsa-miR-146a-5p|+1|0	GAGAACTGAATTCCATGGGTT	isomiR	start-site
hsa-miR-146a-5p|+1|0(+1U)	GAGAACTGAATTCCATGGGTTT	isomiR	mixed: start-site + 3' non-templated addition
hsa-miR-146a-5p|+1|-1	GAGAACTGAATTCCATGGGT	isomiR	mixed: start-site + end-site
hsa-miR-146a-5p|+2|+1	AGAACTGAATTCCATGGGTTG	isomiR	mixed: start-site + end-site
hsa-miR-146a-5p|+2|+2	AGAACTGAATTCCATGGGTTGT	isomiR	shifted
hsa-miR-146a-5p|+2|+3	AGAACTGAATTCCATGGGTTGTG	isomiR	mixed: start-site + end-site
hsa-miR-146a-5p|+2|+4	AGAACTGAATTCCATGGGTTGTGT	isomiR	mixed: start-site + end-site
hsa-miR-146a-5p|+2|0	AGAACTGAATTCCATGGGTT	isomiR	start-site
hsa-miR-146a-5p|+3|0	GAACTGAATTCCATGGGTT	isomiR	start-site
hsa-miR-146a-5p|+3|-1	GAACTGAATTCCATGGGT	isomiR	mixed: start-site + end-site
hsa-miR-146a-5p|0|+1	TGAGAACTGAATTCCATGGGTTG	isomiR	end-site
hsa-miR-146a-5p|0|+2	TGAGAACTGAATTCCATGGGTTGT	isomiR	end-site
hsa-miR-146a-5p|0|0	TGAGAACTGAATTCCATGGGTT	canonical miRNA
hsa-miR-146a-5p|0|0(+1U)	TGAGAACTGAATTCCATGGGTTT	isomiR	3' non-templated addition
hsa-miR-146a-5p|0|0(+2U)	TGAGAACTGAATTCCATGGGTTTT	isomiR	3' non-templated addition
hsa-miR-146a-5p|0|-1	TGAGAACTGAATTCCATGGGT	isomiR	end-site
hsa-miR-146a-5p|0|-2	TGAGAACTGAATTCCATGGG	isomiR	end-site
hsa-miR-146a-5p|0|-3	TGAGAACTGAATTCCATGG	isomiR	end-site
hsa-miR-146a-5p|0|-3(+3U)	TGAGAACTGAATTCCATGGTTT	isomiR	mixed: end-site + 3' non-templated addition
hsa-miR-146a-5p|0|-4	TGAGAACTGAATTCCATG	isomiR	end-site
hsa-miR-146a-5p|-1|0	TTGAGAACTGAATTCCATGGGTT	isomiR	start-site
hsa-miR-146a-5p|-1|0(+1U)	TTGAGAACTGAATTCCATGGGTTT	isomiR	mixed: start-site + 3' non-templated addition
hsa-miR-146a-5p|-1|-1	TTGAGAACTGAATTCCATGGGT	isomiR	shifted
hsa-miR-146a-5p|-1|-2	TTGAGAACTGAATTCCATGGG	isomiR	mixed: start-site + end-site
hsa-miR-146a-5p|-1|-3	TTGAGAACTGAATTCCATGG	isomiR	mixed: start-site + end-site
hsa-miR-146b-3p|+1|0	CCCTGTGGACTCAGTTCTGGT	isomiR	start-site
hsa-miR-146b-3p|+1|0(+1U)	CCCTGTGGACTCAGTTCTGGTT	isomiR	mixed: start-site + 3' non-templated addition
hsa-miR-146b-3p|+1|-1	CCCTGTGGACTCAGTTCTGG	isomiR	mixed: start-site + end-site
hsa-miR-146b-3p|0|0	GCCCTGTGGACTCAGTTCTGGT	canonical miRNA
hsa-miR-146b-3p|0|0(+1U)	GCCCTGTGGACTCAGTTCTGGTT	isomiR	3' non-templated addition
hsa-miR-146b-3p|0|-1	GCCCTGTGGACTCAGTTCTGG	isomiR	end-site
hsa-miR-146b-3p|0|-2	GCCCTGTGGACTCAGTTCTG	isomiR	end-site
hsa-miR-146b-3p|0|-3	GCCCTGTGGACTCAGTTCT	isomiR	end-site
hsa-miR-146b-3p|-1|0	TGCCCTGTGGACTCAGTTCTGGT	isomiR	start-site
hsa-miR-146b-3p|-1|0(+1U)	TGCCCTGTGGACTCAGTTCTGGTT	isomiR	mixed: start-site + 3' non-templated addition
hsa-miR-146b-3p|-1|-1	TGCCCTGTGGACTCAGTTCTGG	isomiR	shifted
hsa-miR-146b-3p|-1|-2	TGCCCTGTGGACTCAGTTCTG	isomiR	mixed: start-site + end-site
hsa-miR-146b-3p|-1|-3	TGCCCTGTGGACTCAGTTCT	isomiR	mixed: start-site + end-site
hsa-miR-146b-5p|+3|+1	GAACTGAATTCCATAGGCTGT	isomiR	mixed: start-site + end-site
hsa-miR-146b-5p|+4|+1	AACTGAATTCCATAGGCTGT	isomiR	mixed: start-site + end-site
hsa-miR-146b-5p|+5|+1	ACTGAATTCCATAGGCTGT	isomiR	mixed: start-site + end-site
hsa-miR-146b-5p|0|+1	TGAGAACTGAATTCCATAGGCTGT	isomiR	end-site
hsa-miR-146b-5p|0|+1(+1U)	TGAGAACTGAATTCCATAGGCTGTT	isomiR	mixed: end-site + 3' non-templated addition
hsa-miR-146b-5p|0|+2	TGAGAACTGAATTCCATAGGCTGTG	isomiR	end-site
hsa-miR-146b-5p|0|+3	TGAGAACTGAATTCCATAGGCTGTGA	isomiR	end-site
hsa-miR-146b-5p|0|0	TGAGAACTGAATTCCATAGGCTG	canonical miRNA
hsa-miR-146b-5p|0|-1	TGAGAACTGAATTCCATAGGCT	isomiR	end-site
hsa-miR-146b-5p|0|-1(+1U)	TGAGAACTGAATTCCATAGGCTT	isomiR	mixed: end-site + 3' non-templated addition
hsa-miR-146b-5p|0|-1(+2U)	TGAGAACTGAATTCCATAGGCTTT	isomiR	mixed: end-site + 3' non-templated addition
hsa-miR-146b-5p|0|-2	TGAGAACTGAATTCCATAGGC	isomiR	end-site
hsa-miR-146b-5p|0|-3	TGAGAACTGAATTCCATAGG	isomiR	end-site
hsa-miR-146b-5p|0|-4	TGAGAACTGAATTCCATAG	isomiR	end-site
hsa-miR-146b-5p|-1|-1	CTGAGAACTGAATTCCATAGGCT	isomiR	shifted
hsa-miR-148a-3p|+1|+1	CAGTGCACTACAGAACTTTGTC	isomiR	shifted
hsa-miR-148a-3p|+1|+2	CAGTGCACTACAGAACTTTGTCT	isomiR	mixed: start-site + end-site
hsa-miR-148a-3p|+1|0	CAGTGCACTACAGAACTTTGT	isomiR	start-site
hsa-miR-148a-3p|+1|0(+1U)	CAGTGCACTACAGAACTTTGTT	isomiR	mixed: start-site + 3' non-templated addition
hsa-miR-148a-3p|+1|-1	CAGTGCACTACAGAACTTTG	isomiR	mixed: start-site + end-site
hsa-miR-148a-3p|+1|-2	CAGTGCACTACAGAACTTT	isomiR	mixed: start-site + end-site
hsa-miR-148a-3p|+1|-2(+2U)	CAGTGCACTACAGAACTTTTT	isomiR	mixed: start-site + end-site + 3' non-templated addition
hsa-miR-148a-3p|+3|0	GTGCACTACAGAACTTTGT	isomiR	start-site
hsa-miR-148a-3p|+3|-1	GTGCACTACAGAACTTTG	isomiR	mixed: start-site + end-site
hsa-miR-148a-3p|+4|0	TGCACTACAGAACTTTGT	isomiR	start-site
hsa-miR-148a-3p|0|+1	TCAGTGCACTACAGAACTTTGTC	isomiR	end-site
hsa-miR-148a-3p|0|+2	TCAGTGCACTACAGAACTTTGTCT	isomiR	end-site
hsa-miR-148a-3p|0|+2(+1U)	TCAGTGCACTACAGAACTTTGTCTT	isomiR	mixed: end-site + 3' non-templated addition
hsa-miR-148a-3p|0|0	TCAGTGCACTACAGAACTTTGT	canonical miRNA
hsa-miR-148a-3p|0|0(+1U)	TCAGTGCACTACAGAACTTTGTT	isomiR	3' non-templated addition
hsa-miR-148a-3p|0|0(+2U)	TCAGTGCACTACAGAACTTTGTTT	isomiR	3' non-templated addition
hsa-miR-148a-3p|0|0(+3U)	TCAGTGCACTACAGAACTTTGTTTT	isomiR	3' non-templated addition
hsa-miR-148a-3p|0|-1	TCAGTGCACTACAGAACTTTG	isomiR	end-site
hsa-miR-148a-3p|0|-2	TCAGTGCACTACAGAACTTT	isomiR	end-site
hsa-miR-148a-3p|0|-2(+1U)	TCAGTGCACTACAGAACTTTT	isomiR	mixed: end-site + 3' non-templated addition
hsa-miR-148a-3p|0|-2(+2U)	TCAGTGCACTACAGAACTTTTT	isomiR	mixed: end-site + 3' non-templated addition
hsa-miR-148a-3p|0|-3	TCAGTGCACTACAGAACTT	isomiR	end-site
hsa-miR-148a-3p|0|-4	TCAGTGCACTACAGAACT	isomiR	end-site
hsa-miR-148a-3p|-1|0	GTCAGTGCACTACAGAACTTTGT	isomiR	start-site
hsa-miR-148a-3p|-1|-1	GTCAGTGCACTACAGAACTTTG	isomiR	shifted
hsa-miR-148a-5p|0|0	AAAGTTCTGAGACACTCCGACT	canonical miRNA
hsa-miR-148a-5p|0|-1	AAAGTTCTGAGACACTCCGAC	isomiR	end-site
hsa-miR-148a-5p|0|-2	AAAGTTCTGAGACACTCCGA	isomiR	end-site
hsa-miR-148a-5p|0|-3	AAAGTTCTGAGACACTCCG	isomiR	end-site
hsa-miR-148a-5p|-1|0	CAAAGTTCTGAGACACTCCGACT	isomiR	start-site
hsa-miR-148a-5p|-1|-1	CAAAGTTCTGAGACACTCCGAC	isomiR	shifted
hsa-miR-148a-5p|-1|-2	CAAAGTTCTGAGACACTCCGA	isomiR	mixed: start-site + end-site
hsa-miR-148b-3p|0|0	TCAGTGCATCACAGAACTTTGT	canonical miRNA
hsa-miR-148b-3p|0|0(+1U)	TCAGTGCATCACAGAACTTTGTT	isomiR	3' non-templated addition
hsa-miR-148b-3p|0|0(+2U)	TCAGTGCATCACAGAACTTTGTTT	isomiR	3' non-templated addition
hsa-miR-148b-3p|0|-1	TCAGTGCATCACAGAACTTTG	isomiR	end-site
hsa-miR-148b-3p|0|-2	TCAGTGCATCACAGAACTTT	isomiR	end-site
hsa-miR-148b-5p|-1|0	GAAGTTCTGTTATACACTCAGGC	isomiR	start-site
hsa-miR-149-5p|0|0	TCTGGCTCCGTGTCTTCACTCCC	canonical miRNA
hsa-miR-149-5p|0|0(+1U)	TCTGGCTCCGTGTCTTCACTCCCT	isomiR	3' non-templated addition
hsa-miR-149-5p|0|-1	TCTGGCTCCGTGTCTTCACTCC	isomiR	end-site
hsa-miR-149-5p|0|-2	TCTGGCTCCGTGTCTTCACTC	isomiR	end-site
hsa-miR-149-5p|0|-3	TCTGGCTCCGTGTCTTCACT	isomiR	end-site
hsa-miR-150-3p|0|-1	CTGGTACAGGCCTGGGGGACA	isomiR (orphan)	end-site
hsa-miR-150-3p|0|-2	CTGGTACAGGCCTGGGGGAC	isomiR (orphan)	end-site
hsa-miR-150-3p|0|-2(+1U)	CTGGTACAGGCCTGGGGGACT	isomiR (orphan)	mixed: end-site + 3' non-templated addition
hsa-miR-150-3p|0|-3	CTGGTACAGGCCTGGGGGA	isomiR (orphan)	end-site
hsa-miR-150-5p|+1|0	CTCCCAACCCTTGTACCAGTG	isomiR	start-site
hsa-miR-150-5p|+1|-1	CTCCCAACCCTTGTACCAGT	isomiR	mixed: start-site + end-site
hsa-miR-150-5p|+1|-2	CTCCCAACCCTTGTACCAG	isomiR	mixed: start-site + end-site
hsa-miR-150-5p|0|+1	TCTCCCAACCCTTGTACCAGTGC	isomiR	end-site
hsa-miR-150-5p|0|0	TCTCCCAACCCTTGTACCAGTG	canonical miRNA
hsa-miR-150-5p|0|0(+1U)	TCTCCCAACCCTTGTACCAGTGT	isomiR	3' non-templated addition
hsa-miR-150-5p|0|-1	TCTCCCAACCCTTGTACCAGT	isomiR	end-site
hsa-miR-150-5p|0|-1(+1U)	TCTCCCAACCCTTGTACCAGTT	isomiR	mixed: end-site + 3' non-templated addition
hsa-miR-150-5p|0|-2	TCTCCCAACCCTTGTACCAG	isomiR	end-site
hsa-miR-150-5p|0|-3	TCTCCCAACCCTTGTACCA	isomiR	end-site
hsa-miR-150-5p|0|-4	TCTCCCAACCCTTGTACC	isomiR	end-site
hsa-miR-150-5p|-2|0	TGTCTCCCAACCCTTGTACCAGTG	isomiR	start-site
hsa-miR-150-5p|-2|-1	TGTCTCCCAACCCTTGTACCAGT	isomiR	mixed: start-site + end-site
hsa-miR-150-5p|-2|-2	TGTCTCCCAACCCTTGTACCAG	isomiR	shifted
hsa-miR-150-5p|-2|-3	TGTCTCCCAACCCTTGTACCA	isomiR	mixed: start-site + end-site
hsa-miR-150-5p|-2|-4	TGTCTCCCAACCCTTGTACC	isomiR	mixed: start-site + end-site
hsa-miR-151a-3p|+1|+1	TAGACTGAAGCTCCTTGAGGA	isomiR	shifted
hsa-miR-151a-3p|+1|+1(+1U)	TAGACTGAAGCTCCTTGAGGAT	isomiR	mixed: shifted + 3' non-templated addition
hsa-miR-151a-3p|+1|0	TAGACTGAAGCTCCTTGAGG	isomiR	start-site
hsa-miR-151a-3p|+1|0(+1U)	TAGACTGAAGCTCCTTGAGGT	isomiR	mixed: start-site + 3' non-templated addition
hsa-miR-151a-3p|+1|-1	TAGACTGAAGCTCCTTGAG	isomiR	mixed: start-site + end-site
hsa-miR-151a-3p|+1|-2	TAGACTGAAGCTCCTTGA	isomiR	mixed: start-site + end-site
hsa-miR-151a-3p|+3|+1	GACTGAAGCTCCTTGAGGA	isomiR	mixed: start-site + end-site
hsa-miR-151a-3p|+3|0	GACTGAAGCTCCTTGAGG	isomiR	start-site
hsa-miR-151a-3p|0|+1	CTAGACTGAAGCTCCTTGAGGA	isomiR	end-site
hsa-miR-151a-3p|0|+1(+1U)	CTAGACTGAAGCTCCTTGAGGAT	isomiR	mixed: end-site + 3' non-templated addition
hsa-miR-151a-3p|0|+1(+2U)	CTAGACTGAAGCTCCTTGAGGATT	isomiR	mixed: end-site + 3' non-templated addition
hsa-miR-151a-3p|0|+2	CTAGACTGAAGCTCCTTGAGGAC	isomiR	end-site
hsa-miR-151a-3p|0|+2(+1U)	CTAGACTGAAGCTCCTTGAGGACT	isomiR	mixed: end-site + 3' non-templated addition
hsa-miR-151a-3p|0|0	CTAGACTGAAGCTCCTTGAGG	canonical miRNA
hsa-miR-151a-3p|0|0(+1U)	CTAGACTGAAGCTCCTTGAGGT	isomiR	3' non-templated addition
hsa-miR-151a-3p|0|0(+2U)	CTAGACTGAAGCTCCTTGAGGTT	isomiR	3' non-templated addition
hsa-miR-151a-3p|0|0(+3U)	CTAGACTGAAGCTCCTTGAGGTTT	isomiR	3' non-templated addition
hsa-miR-151a-3p|0|-1	CTAGACTGAAGCTCCTTGAG	isomiR	end-site
hsa-miR-151a-3p|0|-1(+1U)	CTAGACTGAAGCTCCTTGAGT	isomiR	mixed: end-site + 3' non-templated addition
hsa-miR-151a-3p|0|-1(+2U)	CTAGACTGAAGCTCCTTGAGTT	isomiR	mixed: end-site + 3' non-templated addition
hsa-miR-151a-3p|0|-2	CTAGACTGAAGCTCCTTGA	isomiR	end-site
hsa-miR-151a-3p|0|-2(+1U)	CTAGACTGAAGCTCCTTGAT	isomiR	mixed: end-site + 3' non-templated addition
hsa-miR-151a-3p|0|-2(+2U)	CTAGACTGAAGCTCCTTGATT	isomiR	mixed: end-site + 3' non-templated addition
hsa-miR-151a-3p|0|-3	CTAGACTGAAGCTCCTTG	isomiR	end-site
hsa-miR-151a-3p|0|-3(+1U)	CTAGACTGAAGCTCCTTGT	isomiR	mixed: end-site + 3' non-templated addition
hsa-miR-151a-3p|-1|+1	ACTAGACTGAAGCTCCTTGAGGA	isomiR	mixed: start-site + end-site
hsa-miR-151a-3p|-1|0	ACTAGACTGAAGCTCCTTGAGG	isomiR	start-site
hsa-miR-151a-3p|-1|0(+1U)	ACTAGACTGAAGCTCCTTGAGGT	isomiR	mixed: start-site + 3' non-templated addition
hsa-miR-151a-3p|-1|-1	ACTAGACTGAAGCTCCTTGAG	isomiR	shifted
hsa-miR-151a-3p|-1|-1(+1U)	ACTAGACTGAAGCTCCTTGAGT	isomiR	mixed: shifted + 3' non-templated addition
hsa-miR-151a-3p|-1|-2	ACTAGACTGAAGCTCCTTGA	isomiR	mixed: start-site + end-site
hsa-miR-151a-3p|-1|-3	ACTAGACTGAAGCTCCTTG	isomiR	mixed: start-site + end-site
hsa-miR-151a-3p|-2|+1	TACTAGACTGAAGCTCCTTGAGGA	isomiR	mixed: start-site + end-site
hsa-miR-151a-3p|-2|0	TACTAGACTGAAGCTCCTTGAGG	isomiR	start-site
hsa-miR-151a-3p|-2|0(+1U)	TACTAGACTGAAGCTCCTTGAGGT	isomiR	mixed: start-site + 3' non-templated addition
hsa-miR-151a-3p|-2|-1	TACTAGACTGAAGCTCCTTGAG	isomiR	mixed: start-site + end-site
hsa-miR-151a-3p|-2|-1(+1U)	TACTAGACTGAAGCTCCTTGAGT	isomiR	mixed: start-site + end-site + 3' non-templated addition
hsa-miR-151a-3p|-2|-2	TACTAGACTGAAGCTCCTTGA	isomiR	shifted
hsa-miR-151a-3p|-2|-2(+1U)	TACTAGACTGAAGCTCCTTGAT	isomiR	mixed: shifted + 3' non-templated addition
hsa-miR-151a-3p|-2|-3	TACTAGACTGAAGCTCCTTG	isomiR	mixed: start-site + end-site
hsa-miR-151a-3p|-2|-3(+1U)	TACTAGACTGAAGCTCCTTGT	isomiR	mixed: start-site + end-site + 3' non-templated addition
hsa-miR-151a-5p|+1|+1	CGAGGAGCTCACAGTCTAGTA	isomiR (orphan)	shifted
hsa-miR-151a-5p|+1|0	CGAGGAGCTCACAGTCTAGT	isomiR (orphan)	start-site
hsa-miR-151a-5p|+4|+1	GGAGCTCACAGTCTAGTA	isomiR (orphan)	mixed: start-site + end-site
hsa-miR-152-3p|+1|+1	CAGTGCATGACAGAACTTGGG	isomiR	shifted
hsa-miR-152-3p|+1|0	CAGTGCATGACAGAACTTGG	isomiR	start-site
hsa-miR-152-3p|0|+1	TCAGTGCATGACAGAACTTGGG	isomiR	end-site
hsa-miR-152-3p|0|+1(+1U)	TCAGTGCATGACAGAACTTGGGT	isomiR	mixed: end-site + 3' non-templated addition
hsa-miR-152-3p|0|+1(+2U)	TCAGTGCATGACAGAACTTGGGTT	isomiR	mixed: end-site + 3' non-templated addition
hsa-miR-152-3p|0|0	TCAGTGCATGACAGAACTTGG	canonical miRNA
hsa-miR-152-3p|0|0(+1U)	TCAGTGCATGACAGAACTTGGT	isomiR	3' non-templated addition
hsa-miR-152-3p|0|0(+2U)	TCAGTGCATGACAGAACTTGGTT	isomiR	3' non-templated addition
hsa-miR-152-3p|0|-1	TCAGTGCATGACAGAACTTG	isomiR	end-site
hsa-miR-152-3p|0|-1(+1U)	TCAGTGCATGACAGAACTTGT	isomiR	mixed: end-site + 3' non-templated addition
hsa-miR-152-3p|-1|0	GTCAGTGCATGACAGAACTTGG	isomiR	start-site
hsa-miR-153-5p|-1|-2	GTCATTTTTGTGATGTTGCAG	isomiR (orphan)	mixed: start-site + end-site
hsa-miR-154-5p|0|0	TAGGTTATCCGTGTTGCCTTCG	canonical miRNA (without isomiR)
hsa-miR-155-3p|0|0	CTCCTACATATTAGCATTAACA	canonical miRNA (without isomiR)
hsa-miR-155-5p|+1|+1	TAATGCTAATCGTGATAGGGGTTT	isomiR	shifted
hsa-miR-155-5p|+1|0	TAATGCTAATCGTGATAGGGGTT	isomiR	start-site
hsa-miR-155-5p|+1|-1	TAATGCTAATCGTGATAGGGGT	isomiR	mixed: start-site + end-site
hsa-miR-155-5p|+1|-2	TAATGCTAATCGTGATAGGGG	isomiR	mixed: start-site + end-site
hsa-miR-155-5p|+1|-3	TAATGCTAATCGTGATAGGG	isomiR	mixed: start-site + end-site
hsa-miR-155-5p|+4|0	TGCTAATCGTGATAGGGGTT	isomiR	start-site
hsa-miR-155-5p|0|+1	TTAATGCTAATCGTGATAGGGGTTT	isomiR	end-site
hsa-miR-155-5p|0|+2	TTAATGCTAATCGTGATAGGGGTTTT	isomiR	end-site
hsa-miR-155-5p|0|0	TTAATGCTAATCGTGATAGGGGTT	canonical miRNA
hsa-miR-155-5p|0|-1	TTAATGCTAATCGTGATAGGGGT	isomiR	end-site
hsa-miR-155-5p|0|-2	TTAATGCTAATCGTGATAGGGG	isomiR	end-site
hsa-miR-155-5p|0|-3	TTAATGCTAATCGTGATAGGG	isomiR	end-site
hsa-miR-155-5p|0|-3(+1U)	TTAATGCTAATCGTGATAGGGT	isomiR	mixed: end-site + 3' non-templated addition
hsa-miR-155-5p|0|-3(+2U)	TTAATGCTAATCGTGATAGGGTT	isomiR	mixed: end-site + 3' non-templated addition
hsa-miR-155-5p|0|-4	TTAATGCTAATCGTGATAGG	isomiR	end-site
hsa-miR-155-5p|0|-4(+1U)	TTAATGCTAATCGTGATAGGT	isomiR	mixed: end-site + 3' non-templated addition
hsa-miR-155-5p|0|-5	TTAATGCTAATCGTGATAG	isomiR	end-site
hsa-miR-15a-5p|0|+1	TAGCAGCACATAATGGTTTGTGG	isomiR	end-site
hsa-miR-15a-5p|0|+2	TAGCAGCACATAATGGTTTGTGGA	isomiR	end-site
hsa-miR-15a-5p|0|0	TAGCAGCACATAATGGTTTGTG	canonical miRNA
hsa-miR-15a-5p|0|0(+1U)	TAGCAGCACATAATGGTTTGTGT	isomiR	3' non-templated addition
hsa-miR-15a-5p|0|-1	TAGCAGCACATAATGGTTTGT	isomiR	end-site
hsa-miR-15a-5p|0|-2	TAGCAGCACATAATGGTTTG	isomiR	end-site
hsa-miR-15b-3p|0|0	CGAATCATTATTTGCTGCTCTA	canonical miRNA
hsa-miR-15b-3p|0|0(+1U)	CGAATCATTATTTGCTGCTCTAT	isomiR	3' non-templated addition
hsa-miR-15b-3p|0|-1	CGAATCATTATTTGCTGCTCT	isomiR	end-site
hsa-miR-15b-3p|0|-1(+1U)	CGAATCATTATTTGCTGCTCTT	isomiR	mixed: end-site + 3' non-templated addition
hsa-miR-15b-3p|0|-2	CGAATCATTATTTGCTGCTC	isomiR	end-site
hsa-miR-15b-3p|0|-3	CGAATCATTATTTGCTGCT	isomiR	end-site
hsa-miR-15b-5p|+2|0	GCAGCACATCATGGTTTACA	isomiR	start-site
hsa-miR-15b-5p|+3|0	CAGCACATCATGGTTTACA	isomiR	start-site
hsa-miR-15b-5p|+3|-1	CAGCACATCATGGTTTAC	isomiR	mixed: start-site + end-site
hsa-miR-15b-5p|0|+1	TAGCAGCACATCATGGTTTACAT	isomiR	end-site
hsa-miR-15b-5p|0|0	TAGCAGCACATCATGGTTTACA	canonical miRNA
hsa-miR-15b-5p|0|-1	TAGCAGCACATCATGGTTTAC	isomiR	end-site
hsa-miR-15b-5p|0|-1(+1U)	TAGCAGCACATCATGGTTTACT	isomiR	mixed: end-site + 3' non-templated addition
hsa-miR-15b-5p|0|-2	TAGCAGCACATCATGGTTTA	isomiR	end-site
hsa-miR-15b-5p|0|-2(+1U)	TAGCAGCACATCATGGTTTAT	isomiR	mixed: end-site + 3' non-templated addition
hsa-miR-15b-5p|0|-3	TAGCAGCACATCATGGTTT	isomiR	end-site
hsa-miR-15b-5p|0|-4	TAGCAGCACATCATGGTT	isomiR	end-site
hsa-miR-16-1-3p|0|0	CCAGTATTAACTGTGCTGCTGA	canonical miRNA (without isomiR)
hsa-miR-16-2-3p|0|0	CCAATATTACTGTGCTGCTTTA	canonical miRNA
hsa-miR-16-2-3p|-1|-1	ACCAATATTACTGTGCTGCTTT	isomiR	shifted
hsa-miR-16-2-3p|-1|-2	ACCAATATTACTGTGCTGCTT	isomiR	mixed: start-site + end-site
hsa-miR-16-2-3p|-1|-3	ACCAATATTACTGTGCTGCT	isomiR	mixed: start-site + end-site
hsa-miR-16-5p|+2|0	GCAGCACGTAAATATTGGCG	isomiR	start-site
hsa-miR-16-5p|+3|0	CAGCACGTAAATATTGGCG	isomiR	start-site
hsa-miR-16-5p|+5|+1	GCACGTAAATATTGGCGT	isomiR	mixed: start-site + end-site
hsa-miR-16-5p|0|+1	TAGCAGCACGTAAATATTGGCGT	isomiR	end-site
hsa-miR-16-5p|0|+3	TAGCAGCACGTAAATATTGGCGTAG	isomiR	mixed: end-site + 3' non-templated addition
hsa-miR-16-5p|0|0	TAGCAGCACGTAAATATTGGCG	canonical miRNA
hsa-miR-16-5p|0|-1	TAGCAGCACGTAAATATTGGC	isomiR	end-site
hsa-miR-16-5p|0|-1(+1U)	TAGCAGCACGTAAATATTGGCT	isomiR	mixed: end-site + 3' non-templated addition
hsa-miR-16-5p|0|-2	TAGCAGCACGTAAATATTGG	isomiR	end-site
hsa-miR-16-5p|0|-3	TAGCAGCACGTAAATATTG	isomiR	end-site
hsa-miR-17-3p|+1|+1	CTGCAGTGAAGGCACTTGTAGC	isomiR	shifted
hsa-miR-17-3p|+1|0	CTGCAGTGAAGGCACTTGTAG	isomiR	start-site
hsa-miR-17-3p|0|+1	ACTGCAGTGAAGGCACTTGTAGC	isomiR	end-site
hsa-miR-17-3p|0|0	ACTGCAGTGAAGGCACTTGTAG	canonical miRNA
hsa-miR-17-3p|0|0(+1U)	ACTGCAGTGAAGGCACTTGTAGT	isomiR	3' non-templated addition
hsa-miR-17-3p|0|-1(+1U)	ACTGCAGTGAAGGCACTTGTAT	isomiR	mixed: end-site + 3' non-templated addition
hsa-miR-17-3p|0|-2	ACTGCAGTGAAGGCACTTGT	isomiR	end-site
hsa-miR-17-3p|-1|0	TACTGCAGTGAAGGCACTTGTAG	isomiR	start-site
hsa-miR-17-5p|+1|0	AAAGTGCTTACAGTGCAGGTAG	isomiR	start-site
hsa-miR-17-5p|+2|0	AAGTGCTTACAGTGCAGGTAG	isomiR	start-site
hsa-miR-17-5p|+3|0	AGTGCTTACAGTGCAGGTAG	isomiR	start-site
hsa-miR-17-5p|0|+1	CAAAGTGCTTACAGTGCAGGTAGT	isomiR	end-site
hsa-miR-17-5p|0|0	CAAAGTGCTTACAGTGCAGGTAG	canonical mIRNA
hsa-miR-17-5p|0|-1	CAAAGTGCTTACAGTGCAGGTA	isomiR	end-site
hsa-miR-17-5p|0|-1(+1U)	CAAAGTGCTTACAGTGCAGGTAT	isomiR	mixed: end-site + 3' non-templated addition
hsa-miR-17-5p|0|-2	CAAAGTGCTTACAGTGCAGGT	isomiR	end-site
hsa-miR-17-5p|0|-3	CAAAGTGCTTACAGTGCAGG	isomiR	end-site
hsa-miR-17-5p|0|-4	CAAAGTGCTTACAGTGCAG	isomiR	end-site
hsa-miR-17-5p|-1|0	TCAAAGTGCTTACAGTGCAGGTAG	isomiR	start-site
hsa-miR-17-5p|-1|-1	TCAAAGTGCTTACAGTGCAGGTA	isomiR	shifted
hsa-miR-17-5p|-1|-2	TCAAAGTGCTTACAGTGCAGGT	isomiR	mixed: start-site + end-site
hsa-miR-17-5p|-1|-3	TCAAAGTGCTTACAGTGCAGG	isomiR	mixed: start-site + end-site
hsa-miR-181a-2-3p|+1|0	CCACTGACCGTTGACTGTACC	isomiR	start-site
hsa-miR-181a-2-3p|+1|-1	CCACTGACCGTTGACTGTAC	isomiR	mixed: start-site + end-site
hsa-miR-181a-2-3p|+1|-2	CCACTGACCGTTGACTGTA	isomiR	mixed: start-site + end-site
hsa-miR-181a-2-3p|0|+1	ACCACTGACCGTTGACTGTACCT	isomiR	end-site
hsa-miR-181a-2-3p|0|0	ACCACTGACCGTTGACTGTACC	canonical miRNA
hsa-miR-181a-2-3p|0|-1	ACCACTGACCGTTGACTGTAC	isomiR	end-site
hsa-miR-181a-2-3p|0|-1(+1U)	ACCACTGACCGTTGACTGTACT	isomiR	mixed: end-site + 3' non-templated addition
hsa-miR-181a-2-3p|0|-2	ACCACTGACCGTTGACTGTA	isomiR	end-site
hsa-miR-181a-2-3p|0|-2(+1U)	ACCACTGACCGTTGACTGTAT	isomiR	mixed: end-site + 3' non-templated addition
hsa-miR-181a-2-3p|0|-2(+2U)	ACCACTGACCGTTGACTGTATT	isomiR	mixed: end-site + 3' non-templated addition
hsa-miR-181a-2-3p|0|-3	ACCACTGACCGTTGACTGT	isomiR	end-site
hsa-miR-181a-2-3p|0|-3(+1U)	ACCACTGACCGTTGACTGTT	isomiR	mixed: end-site + 3' non-templated addition
hsa-miR-181a-2-3p|0|-3(+2U)	ACCACTGACCGTTGACTGTTT	isomiR	mixed: end-site + 3' non-templated addition
hsa-miR-181a-2-3p|0|-3(+3U)	ACCACTGACCGTTGACTGTTTT	isomiR	mixed: end-site + 3' non-templated addition
hsa-miR-181a-2-3p|0|-4	ACCACTGACCGTTGACTG	isomiR	end-site
hsa-miR-181a-2-3p|-1|0	AACCACTGACCGTTGACTGTACC	isomiR	start-site
hsa-miR-181a-2-3p|-1|-1	AACCACTGACCGTTGACTGTAC	isomiR	shifted
hsa-miR-181a-2-3p|-1|-1(+1U)	AACCACTGACCGTTGACTGTACT	isomiR	mixed: shifted + 3' non-templated addition
hsa-miR-181a-2-3p|-1|-2	AACCACTGACCGTTGACTGTA	isomiR	mixed: start-site + end-site
hsa-miR-181a-2-3p|-1|-2(+1U)	AACCACTGACCGTTGACTGTAT	isomiR	mixed: start-site + end-site + 3' non-templated addition
hsa-miR-181a-2-3p|-1|-3	AACCACTGACCGTTGACTGT	isomiR	mixed: start-site + end-site
hsa-miR-181a-5p|+1|+1	ACATTCAACGCTGTCGGTGAGTT	isomiR	shifted
hsa-miR-181a-5p|+1|0	ACATTCAACGCTGTCGGTGAGT	isomiR	start-site
hsa-miR-181a-5p|+1|-1	ACATTCAACGCTGTCGGTGAG	isomiR	mixed: start-site + end-site
hsa-miR-181a-5p|+1|-2	ACATTCAACGCTGTCGGTGA	isomiR	mixed: start-site + end-site
hsa-miR-181a-5p|+1|-3	ACATTCAACGCTGTCGGTG	isomiR	mixed: start-site + end-site
hsa-miR-181a-5p|+2|0	CATTCAACGCTGTCGGTGAGT	isomiR	start-site
hsa-miR-181a-5p|+2|-1	CATTCAACGCTGTCGGTGAG	isomiR	mixed: start-site + end-site
hsa-miR-181a-5p|+2|-2	CATTCAACGCTGTCGGTGA	isomiR	mixed: start-site + end-site
hsa-miR-181a-5p|+4|0	TTCAACGCTGTCGGTGAGT	isomiR	start-site
hsa-miR-181a-5p|+4|-1	TTCAACGCTGTCGGTGAG	isomiR	mixed: start-site + end-site
hsa-miR-181a-5p|0|+1	AACATTCAACGCTGTCGGTGAGTT	isomiR	end-site
hsa-miR-181a-5p|0|+2	AACATTCAACGCTGTCGGTGAGTTT	isomiR	end-site
hsa-miR-181a-5p|0|+2(+1U)	AACATTCAACGCTGTCGGTGAGTTTT	isomiR	mixed: end-site + 3' non-templated addition
hsa-miR-181a-5p|0|0	AACATTCAACGCTGTCGGTGAGT	canonical mIRNA
hsa-miR-181a-5p|0|-1	AACATTCAACGCTGTCGGTGAG	isomiR	end-site
hsa-miR-181a-5p|0|-2	AACATTCAACGCTGTCGGTGA	isomiR	end-site
hsa-miR-181a-5p|0|-2(+1U)	AACATTCAACGCTGTCGGTGAT	isomiR	mixed: end-site + 3' non-templated addition
hsa-miR-181a-5p|0|-2(+2U)	AACATTCAACGCTGTCGGTGATT	isomiR	mixed: end-site + 3' non-templated addition
hsa-miR-181a-5p|0|-3	AACATTCAACGCTGTCGGTG	isomiR	end-site
hsa-miR-181a-5p|0|-3(+1U)	AACATTCAACGCTGTCGGTGT	isomiR	mixed: end-site + 3' non-templated addition
hsa-miR-181a-5p|0|-4	AACATTCAACGCTGTCGGT	isomiR	end-site
hsa-miR-181a-5p|0|-4(+1U)	AACATTCAACGCTGTCGGTT	isomiR	mixed: end-site + 3' non-templated addition
hsa-miR-181a-5p|0|-5	AACATTCAACGCTGTCGG	isomiR	end-site
hsa-miR-181a-5p|-1|-1	GAACATTCAACGCTGTCGGTGAG	isomiR	shifted
hsa-miR-181b-2-3p|0|+1	CTCACTGATCAATGAATGCAA	isomiR	end-site
hsa-miR-181b-2-3p|0|+2	CTCACTGATCAATGAATGCAAA	isomiR	end-site
hsa-miR-181b-2-3p|0|0	CTCACTGATCAATGAATGCA	canonical miRNA
hsa-miR-181b-2-3p|0|-1	CTCACTGATCAATGAATGC	isomiR	end-site
hsa-miR-181b-3p|0|+1	CTCACTGAACAATGAATGCAAC	isomiR	end-site
hsa-miR-181b-3p|0|0	CTCACTGAACAATGAATGCAA	canonical miRNA
hsa-miR-181b-3p|0|0(+1U)	CTCACTGAACAATGAATGCAAT	isomiR	3' non-templated addition
hsa-miR-181b-3p|0|-1	CTCACTGAACAATGAATGCA	isomiR	end-site
hsa-miR-181b-3p|0|-1(+1U)	CTCACTGAACAATGAATGCAT	isomiR	mixed: end-site + 3' non-templated addition
hsa-miR-181b-3p|0|-1(+2U)	CTCACTGAACAATGAATGCATT	isomiR	mixed: end-site + 3' non-templated addition
hsa-miR-181b-3p|0|-2	CTCACTGAACAATGAATGC	isomiR	end-site
hsa-miR-181b-5p|+1|+1	ACATTCATTGCTGTCGGTGGGTT	isomiR	shifted
hsa-miR-181b-5p|+1|+2	ACATTCATTGCTGTCGGTGGGTTT	isomiR	mixed: end-site + 3' non-templated addition
hsa-miR-181b-5p|+1|0	ACATTCATTGCTGTCGGTGGGT	isomiR	start-site
hsa-miR-181b-5p|+1|-1	ACATTCATTGCTGTCGGTGGG	isomiR	mixed: start-site + end-site
hsa-miR-181b-5p|+1|-2	ACATTCATTGCTGTCGGTGG	isomiR	mixed: start-site + end-site
hsa-miR-181b-5p|+1|-3	ACATTCATTGCTGTCGGTG	isomiR	mixed: start-site + end-site
hsa-miR-181b-5p|+2|+1	CATTCATTGCTGTCGGTGGGTT	isomiR	mixed: start-site + end-site
hsa-miR-181b-5p|+2|0	CATTCATTGCTGTCGGTGGGT	isomiR	start-site
hsa-miR-181b-5p|+2|-1	CATTCATTGCTGTCGGTGGG	isomiR	mixed: start-site + end-site
hsa-miR-181b-5p|+2|-2	CATTCATTGCTGTCGGTGG	isomiR	mixed: start-site + end-site
hsa-miR-181b-5p|0|+1	AACATTCATTGCTGTCGGTGGGTT	isomiR	end-site
hsa-miR-181b-5p|0|+2	AACATTCATTGCTGTCGGTGGGTTT	isomiR	mixed: end-site + 3' non-templated addition
hsa-miR-181b-5p|0|+2(+1U)	AACATTCATTGCTGTCGGTGGGTTTT	isomiR	mixed: end-site + 3' non-templated addition
hsa-miR-181b-5p|0|0	AACATTCATTGCTGTCGGTGGGT	canonical miRNA
hsa-miR-181b-5p|0|-1	AACATTCATTGCTGTCGGTGGG	isomiR	end-site
hsa-miR-181b-5p|0|-2	AACATTCATTGCTGTCGGTGG	isomiR	end-site
hsa-miR-181b-5p|0|-2(+1U)	AACATTCATTGCTGTCGGTGGT	isomiR	mixed: end-site + 3' non-templated addition
hsa-miR-181b-5p|0|-2(+2U)	AACATTCATTGCTGTCGGTGGTT	isomiR	mixed: end-site + 3' non-templated addition
hsa-miR-181b-5p|0|-3	AACATTCATTGCTGTCGGTG	isomiR	end-site
hsa-miR-181b-5p|0|-3(+1U)	AACATTCATTGCTGTCGGTGT	isomiR	mixed: end-site + 3' non-templated addition
hsa-miR-181b-5p|0|-4	AACATTCATTGCTGTCGGT	isomiR	end-site
hsa-miR-181b-5p|0|-5	AACATTCATTGCTGTCGG	isomiR	end-site
hsa-miR-181b-5p|-1|0	CAACATTCATTGCTGTCGGTGGGT	isomiR	start-site
hsa-miR-181b-5p|-1|-1	CAACATTCATTGCTGTCGGTGGG	isomiR	shifted
hsa-miR-181b-5p|-1|-2	CAACATTCATTGCTGTCGGTGG	isomiR	mixed: start-site + end-site
hsa-miR-181b-5p|-1|-3	CAACATTCATTGCTGTCGGTG	isomiR	mixed: start-site + end-site
hsa-miR-181c-5p|0|+1	AACATTCAACCTGTCGGTGAGTT	isomiR	end-site
hsa-miR-181c-5p|0|0	AACATTCAACCTGTCGGTGAGT	canonical miRNA
hsa-miR-181c-5p|0|-1	AACATTCAACCTGTCGGTGAG	isomiR	end-site
hsa-miR-181d-5p|0|+1	AACATTCATTGTTGTCGGTGGGTT	isomiR	end-site
hsa-miR-181d-5p|0|0	AACATTCATTGTTGTCGGTGGGT	canonical miRNA
hsa-miR-181d-5p|0|-1	AACATTCATTGTTGTCGGTGGG	isomiR	end-site
hsa-miR-181d-5p|0|-2	AACATTCATTGTTGTCGGTGG	isomiR	end-site
hsa-miR-182-5p|+1|0	TTGGCAATGGTAGAACTCACACT	isomiR	start-site
hsa-miR-182-5p|+1|-2	TTGGCAATGGTAGAACTCACA	isomiR	mixed: start-site + end-site
hsa-miR-182-5p|+5|0	CAATGGTAGAACTCACACT	isomiR	start-site
hsa-miR-182-5p|0|+1	TTTGGCAATGGTAGAACTCACACTG	isomiR	end-site
hsa-miR-182-5p|0|+1(+1U)	TTTGGCAATGGTAGAACTCACACTGT	isomiR	mixed: end-site + 3' non-templated addition
hsa-miR-182-5p|0|+2	TTTGGCAATGGTAGAACTCACACTGG	isomiR	end-site
hsa-miR-182-5p|0|+2(+1U)	TTTGGCAATGGTAGAACTCACACTGGT	isomiR	mixed: end-site + 3' non-templated addition
hsa-miR-182-5p|0|0	TTTGGCAATGGTAGAACTCACACT	canonical miRNA
hsa-miR-182-5p|0|0(+1U)	TTTGGCAATGGTAGAACTCACACTT	isomiR	3' non-templated addition
hsa-miR-182-5p|0|-1	TTTGGCAATGGTAGAACTCACAC	isomiR	end-site
hsa-miR-182-5p|0|-2	TTTGGCAATGGTAGAACTCACA	isomiR	end-site
hsa-miR-182-5p|0|-2(+1U)	TTTGGCAATGGTAGAACTCACAT	isomiR	mixed: end-site + 3' non-templated addition
hsa-miR-182-5p|0|-3	TTTGGCAATGGTAGAACTCAC	isomiR	end-site
hsa-miR-182-5p|0|-3(+1U)	TTTGGCAATGGTAGAACTCACT	isomiR	mixed: end-site + 3' non-templated addition
hsa-miR-182-5p|0|-4	TTTGGCAATGGTAGAACTCA	isomiR	end-site
hsa-miR-182-5p|0|-4(+1U)	TTTGGCAATGGTAGAACTCAT	isomiR	mixed: end-site + 3' non-templated addition
hsa-miR-182-5p|0|-5	TTTGGCAATGGTAGAACTC	isomiR	end-site
hsa-miR-183-5p|+1|+1	ATGGCACTGGTAGAATTCACTG	isomiR	shifted
hsa-miR-183-5p|+1|+2	ATGGCACTGGTAGAATTCACTGT	isomiR	mixed: start-site + end-site
hsa-miR-183-5p|+1|0	ATGGCACTGGTAGAATTCACT	isomiR	start-site
hsa-miR-183-5p|+1|-1	ATGGCACTGGTAGAATTCAC	isomiR	mixed: start-site + end-site
hsa-miR-183-5p|+1|-2	ATGGCACTGGTAGAATTCA	isomiR	mixed: start-site + end-site
hsa-miR-183-5p|+1|-3	ATGGCACTGGTAGAATTC	isomiR	mixed: start-site + end-site
hsa-miR-183-5p|+2|+1	TGGCACTGGTAGAATTCACTG	isomiR	mixed: start-site + end-site
hsa-miR-183-5p|0|+1	TATGGCACTGGTAGAATTCACTG	isomiR	end-site
hsa-miR-183-5p|0|+2	TATGGCACTGGTAGAATTCACTGT	isomiR	end-site
hsa-miR-183-5p|0|0	TATGGCACTGGTAGAATTCACT	canonical miRNA
hsa-miR-183-5p|0|0(+1U)	TATGGCACTGGTAGAATTCACTT	isomiR	3' non-templated addition
hsa-miR-183-5p|0|-1	TATGGCACTGGTAGAATTCAC	isomiR	end-site
hsa-miR-183-5p|0|-2	TATGGCACTGGTAGAATTCA	isomiR	end-site
hsa-miR-183-5p|0|-3	TATGGCACTGGTAGAATTC	isomiR	end-site
hsa-miR-183-5p|0|-4	TATGGCACTGGTAGAATT	isomiR	end-site
hsa-miR-183-5p|-2|-2	TGTATGGCACTGGTAGAATTCA	isomiR	shifted
hsa-miR-184|0|0	TGGACGGAGAACTGATAAGGGT	canonical miRNA
hsa-miR-184|0|-1	TGGACGGAGAACTGATAAGGG	isomiR	end-site
hsa-miR-184|0|-2	TGGACGGAGAACTGATAAGG	isomiR	end-site
hsa-miR-184|0|-3	TGGACGGAGAACTGATAAG	isomiR	end-site
hsa-miR-1843|0|+1]	TATGGAGGTCTCTGTCTGGCT	isomiR	end-site
hsa-miR-1843|0|+2(+1U)]	TATGGAGGTCTCTGTCTGGCTTT	isomiR	mixed: end-site + 3' non-templated addition
hsa-miR-1843|0|+2]	TATGGAGGTCTCTGTCTGGCTT	isomiR	end-site
hsa-miR-1843|0|+3]	TATGGAGGTCTCTGTCTGGCTTA	isomiR	end-site
hsa-miR-1843|0|0]	TATGGAGGTCTCTGTCTGGC	canonical miRNA
hsa-miR-1843|-1|+1]	ATATGGAGGTCTCTGTCTGGCT	isomiR	mixed: start-site + end-site
hsa-miR-1843|-1|0]	ATATGGAGGTCTCTGTCTGGC	isomiR	start-site
hsa-miR-1843|-2|0]	TATATGGAGGTCTCTGTCTGGC	isomiR	start-site
hsa-miR-185-3p|0|-1	AGGGGCTGGCTTTCCTCTGGT	isomiR (orphan)	end-site
hsa-miR-185-3p|0|-1(+1U)	AGGGGCTGGCTTTCCTCTGGTT	isomiR (orphan)	mixed: end-site + 3' non-templated addition
hsa-miR-185-3p|0|-2	AGGGGCTGGCTTTCCTCTGG	isomiR (orphan)	end-site
hsa-miR-185-5p|0|+1	TGGAGAGAAAGGCAGTTCCTGAT	isomiR	end-site
hsa-miR-185-5p|0|0	TGGAGAGAAAGGCAGTTCCTGA	canonical miRNA
hsa-miR-185-5p|0|-1	TGGAGAGAAAGGCAGTTCCTG	isomiR	end-site
hsa-miR-185-5p|0|-1(+1U)	TGGAGAGAAAGGCAGTTCCTGT	isomiR	mixed: end-site + 3' non-templated addition
hsa-miR-185-5p|0|-2	TGGAGAGAAAGGCAGTTCCT	isomiR	end-site
hsa-miR-186-5p|+1|+1	AAAGAATTCTCCTTTTGGGCTT	isomiR	shifted
hsa-miR-186-5p|+1|0	AAAGAATTCTCCTTTTGGGCT	isomiR	start-site
hsa-miR-186-5p|+2|0	AAGAATTCTCCTTTTGGGCT	isomiR	start-site
hsa-miR-186-5p|0|+1	CAAAGAATTCTCCTTTTGGGCTT	isomiR	end-site
hsa-miR-186-5p|0|+2	CAAAGAATTCTCCTTTTGGGCTTT	isomiR	end-site
hsa-miR-186-5p|0|+2(+1U)	CAAAGAATTCTCCTTTTGGGCTTTT	isomiR	mixed: end-site + 3' non-templated addition
hsa-miR-186-5p|0|0	CAAAGAATTCTCCTTTTGGGCT	canonical miRNA
hsa-miR-186-5p|0|-1	CAAAGAATTCTCCTTTTGGGC	isomiR	end-site
hsa-miR-186-5p|0|-2	CAAAGAATTCTCCTTTTGGG	isomiR	end-site
hsa-miR-186-5p|0|-2(+1U)	CAAAGAATTCTCCTTTTGGGT	isomiR	mixed: end-site + 3' non-templated addition
hsa-miR-186-5p|0|-3	CAAAGAATTCTCCTTTTGG	isomiR	end-site
hsa-miR-187-3p|+1|0	CGTGTCTTGTGTTGCAGCCGG	isomiR	start-site
hsa-miR-187-3p|+1|0(+1U)	CGTGTCTTGTGTTGCAGCCGGT	isomiR	mixed: start-site + 3' non-templated addition
hsa-miR-187-3p|0|+1	TCGTGTCTTGTGTTGCAGCCGGA	isomiR	end-site
hsa-miR-187-3p|0|+1(+1U)	TCGTGTCTTGTGTTGCAGCCGGAT	isomiR	mixed: end-site + 3' non-templated addition
hsa-miR-187-3p|0|0	TCGTGTCTTGTGTTGCAGCCGG	canonical miRNA
hsa-miR-187-3p|0|0(+1U)	TCGTGTCTTGTGTTGCAGCCGGT	isomiR	3' non-templated addition
hsa-miR-187-3p|0|0(+2U)	TCGTGTCTTGTGTTGCAGCCGGTT	isomiR	3' non-templated addition
hsa-miR-187-3p|0|-1	TCGTGTCTTGTGTTGCAGCCG	isomiR	end-site
hsa-miR-187-3p|0|-1(+1U)	TCGTGTCTTGTGTTGCAGCCGT	isomiR	mixed: end-site + 3' non-templated addition
hsa-miR-187-3p|0|-1(+2U)	TCGTGTCTTGTGTTGCAGCCGTT	isomiR	mixed: end-site + 3' non-templated addition
hsa-miR-187-3p|0|-2	TCGTGTCTTGTGTTGCAGCC	isomiR	end-site
hsa-miR-187-3p|0|-4	TCGTGTCTTGTGTTGCAG	isomiR	end-site
hsa-miR-187-3p|-1|0	CTCGTGTCTTGTGTTGCAGCCGG	isomiR	start-site
hsa-miR-187-3p|-1|-1	CTCGTGTCTTGTGTTGCAGCCG	isomiR	shifted
hsa-miR-188-3p|0|-1	CTCCCACATGCAGGGTTTGC	isomiR (orphan)	end-site
hsa-miR-188-5p|0|+1	CATCCCTTGCATGGTGGAGGGT	isomiR	end-site
hsa-miR-188-5p|0|+1(+1U)	CATCCCTTGCATGGTGGAGGGTT	isomiR	mixed: end-site + 3' non-templated addition
hsa-miR-188-5p|0|0	CATCCCTTGCATGGTGGAGGG	canonical miRNA
hsa-miR-188-5p|0|-1	CATCCCTTGCATGGTGGAGG	isomiR	end-site
hsa-miR-18a-3p|0|0	ACTGCCCTAAGTGCTCCTTCTGG	canonical miRNA
hsa-miR-18a-3p|0|-1	ACTGCCCTAAGTGCTCCTTCTG	isomiR	end-site
hsa-miR-18a-3p|0|-1(+1U)	ACTGCCCTAAGTGCTCCTTCTGT	isomiR	mixed: end-site + 3' non-templated addition
hsa-miR-18a-3p|0|-2	ACTGCCCTAAGTGCTCCTTCT	isomiR	end-site
hsa-miR-18a-5p|0|0	TAAGGTGCATCTAGTGCAGATAG	canonical miRNA
hsa-miR-18a-5p|0|-1	TAAGGTGCATCTAGTGCAGATA	isomiR	end-site
hsa-miR-18a-5p|0|-2	TAAGGTGCATCTAGTGCAGAT	isomiR	end-site
hsa-miR-18b-3p|-3|-3	TACTGCCCTAAATGCCCCTTCT	isomiR (orphan)	shifted
hsa-miR-190a-5p|0|-1	TGATATGTTTGATATATTAGG	isomiR (orphan)	end-site
hsa-miR-191-3p|+1|0	CTGCGCTTGGATTTCGTCCCC	isomiR	start-site
hsa-miR-191-3p|0|0	GCTGCGCTTGGATTTCGTCCCC	canonical miRNA
hsa-miR-191-3p|0|-1	GCTGCGCTTGGATTTCGTCCC	isomiR	end-site
hsa-miR-191-5p|+1|+1	AACGGAATCCCAAAAGCAGCTGT	isomiR	shifted
hsa-miR-191-5p|+1|0	AACGGAATCCCAAAAGCAGCTG	isomiR	start-site
hsa-miR-191-5p|+1|-1	AACGGAATCCCAAAAGCAGCT	isomiR	mixed: start-site + end-site
hsa-miR-191-5p|+1|-2	AACGGAATCCCAAAAGCAGC	isomiR	mixed: start-site + end-site
hsa-miR-191-5p|+3|0	CGGAATCCCAAAAGCAGCTG	isomiR	start-site
hsa-miR-191-5p|+3|-1	CGGAATCCCAAAAGCAGCT	isomiR	mixed: start-site + end-site
hsa-miR-191-5p|0|+1	CAACGGAATCCCAAAAGCAGCTGT	isomiR	end-site
hsa-miR-191-5p|0|0	CAACGGAATCCCAAAAGCAGCTG	canonical miRNA
hsa-miR-191-5p|0|-1	CAACGGAATCCCAAAAGCAGCT	isomiR	end-site
hsa-miR-191-5p|0|-1(+1U)	CAACGGAATCCCAAAAGCAGCTT	isomiR	mixed: end-site + 3' non-templated addition
hsa-miR-191-5p|0|-1(+2U)	CAACGGAATCCCAAAAGCAGCTTT	isomiR	mixed: end-site + 3' non-templated addition
hsa-miR-191-5p|0|-2	CAACGGAATCCCAAAAGCAGC	isomiR	end-site
hsa-miR-191-5p|0|-3	CAACGGAATCCCAAAAGCAG	isomiR	end-site
hsa-miR-191-5p|0|-4	CAACGGAATCCCAAAAGCA	isomiR	end-site
hsa-miR-191-5p|0|-5	CAACGGAATCCCAAAAGC	isomiR	end-site
hsa-miR-192-3p|0|0	CTGCCAATTCCATAGGTCACAG	canonical miRNA (without isomiR)
hsa-miR-192-5p|+1|+1	TGACCTATGAATTGACAGCCA	isomiR	shifted
hsa-miR-192-5p|+1|+1(+1U)	TGACCTATGAATTGACAGCCAT	isomiR	mixed: shifted + 3' non-templated addition
hsa-miR-192-5p|+1|+2	TGACCTATGAATTGACAGCCAG	isomiR	mixed: start-site + end-site
hsa-miR-192-5p|+1|+3	TGACCTATGAATTGACAGCCAGT	isomiR	mixed: start-site + end-site
hsa-miR-192-5p|+1|0	TGACCTATGAATTGACAGCC	isomiR	start-site
hsa-miR-192-5p|0|+1	CTGACCTATGAATTGACAGCCA	isomiR	end-site
hsa-miR-192-5p|0|+1(+1U)	CTGACCTATGAATTGACAGCCAT	isomiR	mixed: end-site + 3' non-templated addition
hsa-miR-192-5p|0|+1(+2U)	CTGACCTATGAATTGACAGCCATT	isomiR	mixed: end-site + 3' non-templated addition
hsa-miR-192-5p|0|+2	CTGACCTATGAATTGACAGCCAG	isomiR	end-site
hsa-miR-192-5p|0|0	CTGACCTATGAATTGACAGCC	canonical miRNA
hsa-miR-192-5p|0|0(+1U)	CTGACCTATGAATTGACAGCCT	isomiR	3' non-templated addition
hsa-miR-192-5p|0|-1	CTGACCTATGAATTGACAGC	isomiR	end-site
hsa-miR-192-5p|0|-2	CTGACCTATGAATTGACAG	isomiR	end-site
hsa-miR-192-5p|0|-3	CTGACCTATGAATTGACA	isomiR	end-site
hsa-miR-193a-3p|0|0	AACTGGCCTACAAAGTCCCAGT	canonical miRNA
hsa-miR-193a-3p|0|-1	AACTGGCCTACAAAGTCCCAG	isomiR	end-site
hsa-miR-193a-3p|0|-2	AACTGGCCTACAAAGTCCCA	isomiR	end-site
hsa-miR-193a-5p|0|+1	TGGGTCTTTGCGGGCGAGATGAG	isomiR	end-site
hsa-miR-193a-5p|0|0	TGGGTCTTTGCGGGCGAGATGA	canonical miRNA
hsa-miR-193a-5p|0|0(+1U)	TGGGTCTTTGCGGGCGAGATGAT	isomiR	3' non-templated addition
hsa-miR-193a-5p|0|-1	TGGGTCTTTGCGGGCGAGATG	isomiR	end-site
hsa-miR-193a-5p|0|-1(+1U)	TGGGTCTTTGCGGGCGAGATGT	isomiR	mixed: end-site + 3' non-templated addition
hsa-miR-193a-5p|0|-2	TGGGTCTTTGCGGGCGAGAT	isomiR	end-site
hsa-miR-193a-5p|0|-2(+1U)	TGGGTCTTTGCGGGCGAGATT	isomiR	mixed: end-site + 3' non-templated addition
hsa-miR-193a-5p|0|-3	TGGGTCTTTGCGGGCGAGA	isomiR	end-site
hsa-miR-193a-5p|0|-4	TGGGTCTTTGCGGGCGAG	isomiR	end-site
hsa-miR-193a-5p|0|-4(+1U)	TGGGTCTTTGCGGGCGAGT	isomiR	mixed: end-site + 3' non-templated addition
hsa-miR-193b-3p|+1|0	ACTGGCCCTCAAAGTCCCGCT	isomiR	start-site
hsa-miR-193b-3p|+2|0	CTGGCCCTCAAAGTCCCGCT	isomiR	start-site
hsa-miR-193b-3p|0|+1	AACTGGCCCTCAAAGTCCCGCTT	isomiR	end-site
hsa-miR-193b-3p|0|0	AACTGGCCCTCAAAGTCCCGCT	canonical miRNA
hsa-miR-193b-3p|0|-1	AACTGGCCCTCAAAGTCCCGC	isomiR	end-site
hsa-miR-193b-3p|0|-2	AACTGGCCCTCAAAGTCCCG	isomiR	end-site
hsa-miR-193b-5p|0|0	CGGGGTTTTGAGGGCGAGATGA	canonical miRNA
hsa-miR-193b-5p|0|-1	CGGGGTTTTGAGGGCGAGATG	isomiR	end-site
hsa-miR-194-3p|0|0	CCAGTGGGGCTGCTGTTATCTG	canonical miRNA
hsa-miR-194-3p|0|0(+1U)	CCAGTGGGGCTGCTGTTATCTGT	isomiR	3' non-templated addition
hsa-miR-194-5p|0|+1	TGTAACAGCAACTCCATGTGGAA	isomiR	3' non-templated addition
hsa-miR-194-5p|0|0	TGTAACAGCAACTCCATGTGGA	canonical miRNA
hsa-miR-194-5p|0|-1	TGTAACAGCAACTCCATGTGG	isomiR	end-site
hsa-miR-195-3p|0|+1	CCAATATTGGCTGTGCTGCTCCA	isomiR	end-site
hsa-miR-195-3p|0|0	CCAATATTGGCTGTGCTGCTCC	canonical miRNA
hsa-miR-195-5p|0|+1	TAGCAGCACAGAAATATTGGCA	isomiR	end-site
hsa-miR-195-5p|0|0	TAGCAGCACAGAAATATTGGC	canonical miRNA
hsa-miR-195-5p|0|-1	TAGCAGCACAGAAATATTGG	isomiR	end-site
hsa-miR-195-5p|0|-2	TAGCAGCACAGAAATATTG	isomiR	end-site
hsa-miR-196a-5p|0|+1	TAGGTAGTTTCATGTTGTTGGGA	isomiR	3' non-templated addition
hsa-miR-196a-5p|0|0	TAGGTAGTTTCATGTTGTTGGG	canonical miRNA
hsa-miR-196a-5p|0|0(+1U)	TAGGTAGTTTCATGTTGTTGGGT	isomiR	3' non-templated addition
hsa-miR-196a-5p|0|-1	TAGGTAGTTTCATGTTGTTGG	isomiR	end-site
hsa-miR-196a-5p|0|-1(+1U)	TAGGTAGTTTCATGTTGTTGGT	isomiR	mixed: end-site + 3' non-templated addition
hsa-miR-196a-5p|0|-2	TAGGTAGTTTCATGTTGTTG	isomiR	end-site
hsa-miR-196b-5p|0|+1	TAGGTAGTTTCCTGTTGTTGGGA	isomiR	end-site
hsa-miR-196b-5p|0|+2	TAGGTAGTTTCCTGTTGTTGGGAT	isomiR	end-site
hsa-miR-196b-5p|0|0	TAGGTAGTTTCCTGTTGTTGGG	canonical miRNA
hsa-miR-196b-5p|0|0(+1U)	TAGGTAGTTTCCTGTTGTTGGGT	isomiR	3' non-templated addition
hsa-miR-196b-5p|0|0(+2U)	TAGGTAGTTTCCTGTTGTTGGGTT	isomiR	3' non-templated addition
hsa-miR-196b-5p|0|-1	TAGGTAGTTTCCTGTTGTTGG	isomiR	end-site
hsa-miR-196b-5p|0|-1(+1U)	TAGGTAGTTTCCTGTTGTTGGT	isomiR	mixed: end-site + 3' non-templated addition
hsa-miR-196b-5p|0|-2	TAGGTAGTTTCCTGTTGTTG	isomiR	end-site
hsa-miR-196b-5p|0|-3	TAGGTAGTTTCCTGTTGTT	isomiR	end-site
hsa-miR-197-3p|+1|+1	TCACCACCTTCTCCACCCAGCA	isomiR	shifted
hsa-miR-197-3p|+1|0	TCACCACCTTCTCCACCCAGC	isomiR	start-site
hsa-miR-197-3p|0|+1	TTCACCACCTTCTCCACCCAGCA	isomiR	end-site
hsa-miR-197-3p|0|+2	TTCACCACCTTCTCCACCCAGCAT	isomiR	end-site
hsa-miR-197-3p|0|0	TTCACCACCTTCTCCACCCAGC	canonical miRNA
hsa-miR-197-3p|0|0(+1U)	TTCACCACCTTCTCCACCCAGCT	isomiR	3' non-templated addition
hsa-miR-197-3p|0|-1	TTCACCACCTTCTCCACCCAG	isomiR	end-site
hsa-miR-197-3p|0|-1(+1U)	TTCACCACCTTCTCCACCCAGT	isomiR	mixed: end-site + 3' non-templated addition
hsa-miR-197-3p|0|-2	TTCACCACCTTCTCCACCCA	isomiR	end-site
hsa-miR-197-3p|0|-2(+1U)	TTCACCACCTTCTCCACCCAT	isomiR	mixed: end-site + 3' non-templated addition
hsa-miR-197-3p|0|-3	TTCACCACCTTCTCCACCC	isomiR	end-site
hsa-miR-197-3p|0|-4	TTCACCACCTTCTCCACC	isomiR	end-site
hsa-miR-197-3p|-1|0	CTTCACCACCTTCTCCACCCAGC	isomiR	end-site
hsa-miR-1976|+1|+2	CTCCTGCCCTCCTTGCTGTAG	isomiR (orphan)	mixed: start-site + end-site
hsa-miR-1976|+1|+2(+1U)	CTCCTGCCCTCCTTGCTGTAGT	isomiR (orphan)	mixed: start-site + end-site + 3' non-templated addition
hsa-miR-1976|+1|+3	CTCCTGCCCTCCTTGCTGTAGA	isomiR (orphan)	mixed: start-site + end-site
hsa-miR-1976|+2|+2	TCCTGCCCTCCTTGCTGTAG	isomiR (orphan)	shifted
hsa-miR-1976|+2|+2(+1U)	TCCTGCCCTCCTTGCTGTAGT	isomiR (orphan)	mixed: shifted + 3' non-templated addition
hsa-miR-1976|+2|+3	TCCTGCCCTCCTTGCTGTAGA	isomiR (orphan)	mixed: start-site + end-site
hsa-miR-1976|0|+2	CCTCCTGCCCTCCTTGCTGTAG	isomiR (orphan)	end-site
hsa-miR-1976|0|+2(+1U)	CCTCCTGCCCTCCTTGCTGTAGT	isomiR (orphan)	mixed: end-site + 3' non-templated addition
hsa-miR-1976|0|+3	CCTCCTGCCCTCCTTGCTGTAGA	isomiR (orphan)	end-site
hsa-miR-1976|-1|+2	TCCTCCTGCCCTCCTTGCTGTAG	isomiR (orphan)	mixed: start-site + end-site
hsa-miR-199a-3p|+1|+1	CAGTAGTCTGCACATTGGTTAG	isomiR	shifted
hsa-miR-199a-3p|+1|0	CAGTAGTCTGCACATTGGTTA	isomiR	start-site
hsa-miR-199a-3p|+1|0(+1U)	CAGTAGTCTGCACATTGGTTAT	isomiR	mixed: start-site + 3' non-templated addition
hsa-miR-199a-3p|+1|-1	CAGTAGTCTGCACATTGGTT	isomiR	mixed: start-site + end-site
hsa-miR-199a-3p|+1|-1(+1U)	CAGTAGTCTGCACATTGGTTT	isomiR	mixed: start-site + end-site + 3' non-templated addition
hsa-miR-199a-3p|+1|-2	CAGTAGTCTGCACATTGGT	isomiR	mixed: start-site + end-site
hsa-miR-199a-3p|+1|-3	CAGTAGTCTGCACATTGG	isomiR	mixed: start-site + end-site
hsa-miR-199a-3p|+3|-1	GTAGTCTGCACATTGGTT	isomiR	mixed: start-site + end-site
hsa-miR-199a-3p|0|+1	ACAGTAGTCTGCACATTGGTTAG	isomiR	end-site
hsa-miR-199a-3p|0|+2	ACAGTAGTCTGCACATTGGTTAGA	isomiR	mixed: end-site + 3' non-templated addition
hsa-miR-199a-3p|0|0	ACAGTAGTCTGCACATTGGTTA	canonical miRNA
hsa-miR-199a-3p|0|0(+1U)	ACAGTAGTCTGCACATTGGTTAT	isomiR	3' non-templated addition
hsa-miR-199a-3p|0|-1	ACAGTAGTCTGCACATTGGTT	isomiR	end-site
hsa-miR-199a-3p|0|-1(+1U)	ACAGTAGTCTGCACATTGGTTT	isomiR	mixed: end-site + 3' non-templated addition
hsa-miR-199a-3p|0|-1(+2U)	ACAGTAGTCTGCACATTGGTTTT	isomiR	mixed: end-site + 3' non-templated addition
hsa-miR-199a-3p|0|-2	ACAGTAGTCTGCACATTGGT	isomiR	end-site
hsa-miR-199a-3p|0|-3	ACAGTAGTCTGCACATTGG	isomiR	end-site
hsa-miR-199a-3p|0|-4	ACAGTAGTCTGCACATTG	isomiR	end-site
hsa-miR-199a-3p|-1|+1	TACAGTAGTCTGCACATTGGTTAG	isomiR	mixed: start-site + end-site
hsa-miR-199a-3p|-1|0	TACAGTAGTCTGCACATTGGTTA	isomiR	start-site
hsa-miR-199a-3p|-1|0(+1U)	TACAGTAGTCTGCACATTGGTTAT	isomiR	mixed: start-site + 3' non-templated addition
hsa-miR-199a-3p|-1|-1	TACAGTAGTCTGCACATTGGTT	isomiR	shifted
hsa-miR-199a-3p|-1|-1(+1U)	TACAGTAGTCTGCACATTGGTTT	isomiR	mixed: shifted + 3' non-templated addition
hsa-miR-199a-3p|-1|-2	TACAGTAGTCTGCACATTGGT	isomiR	mixed: start-site + end-site
hsa-miR-199a-3p|-1|-3	TACAGTAGTCTGCACATTGG	isomiR	mixed: start-site + end-site
hsa-miR-199a-3p|-1|-4	TACAGTAGTCTGCACATTG	isomiR	mixed: start-site + end-site
hsa-miR-199a-5p|+1|0	CCAGTGTTCAGACTACCTGTTC	isomiR	start-site
hsa-miR-199a-5p|+1|-1	CCAGTGTTCAGACTACCTGTT	isomiR	mixed: start-site + end-site
hsa-miR-199a-5p|0|+1	CCCAGTGTTCAGACTACCTGTTCA	isomiR	end-site
hsa-miR-199a-5p|0|0	CCCAGTGTTCAGACTACCTGTTC	canonical miRNA
hsa-miR-199a-5p|0|0(+1U)	CCCAGTGTTCAGACTACCTGTTCT	isomiR	3' non-templated addition
hsa-miR-199a-5p|0|-1	CCCAGTGTTCAGACTACCTGTT	isomiR	end-site
hsa-miR-199a-5p|0|-1(+1U)	CCCAGTGTTCAGACTACCTGTTT	isomiR	mixed: end-site + 3' non-templated addition
hsa-miR-199a-5p|0|-2	CCCAGTGTTCAGACTACCTGT	isomiR	end-site
hsa-miR-199a-5p|0|-3	CCCAGTGTTCAGACTACCTG	isomiR	end-site
hsa-miR-199a-5p|0|-4	CCCAGTGTTCAGACTACCT	isomiR	end-site
hsa-miR-199a-5p|0|-5	CCCAGTGTTCAGACTACC	isomiR	end-site
hsa-miR-199b-5p|0|+1	CCCAGTGTTTAGACTATCTGTTCA	isomiR	end-site
hsa-miR-199b-5p|0|0	CCCAGTGTTTAGACTATCTGTTC	canonical miRNA
hsa-miR-199b-5p|0|0(+1U)	CCCAGTGTTTAGACTATCTGTTCT	isomiR	3' non-templated addition
hsa-miR-199b-5p|0|-1	CCCAGTGTTTAGACTATCTGTT	isomiR	end-site
hsa-miR-199b-5p|0|-2	CCCAGTGTTTAGACTATCTGT	isomiR	end-site
hsa-miR-199b-5p|0|-3	CCCAGTGTTTAGACTATCTG	isomiR	end-site
hsa-miR-19a-3p|0|0	TGTGCAAATCTATGCAAAACTGA	canonical miRNA
hsa-miR-19a-3p|0|-1	TGTGCAAATCTATGCAAAACTG	isomiR	end-site
hsa-miR-19b-1-5p|0|0	AGTTTTGCAGGTTTGCATCCAGC	canonical miRNA
hsa-miR-19b-1-5p|0|-1	AGTTTTGCAGGTTTGCATCCAG	isomiR	end-site
hsa-miR-19b-3p|0|0	TGTGCAAATCCATGCAAAACTGA	canonical miRNA
hsa-miR-19b-3p|0|-1	TGTGCAAATCCATGCAAAACTG	isomiR	end-site
hsa-miR-19b-3p|0|-1(+1U)	TGTGCAAATCCATGCAAAACTGT	isomiR	mixed: end-site + 3' non-templated addition
hsa-miR-19b-3p|0|-2	TGTGCAAATCCATGCAAAACT	isomiR	end-site
hsa-miR-19b-3p|0|-3	TGTGCAAATCCATGCAAAAC	isomiR	end-site
hsa-miR-19b-3p|-1|0	CTGTGCAAATCCATGCAAAACTGA	isomiR	start-site
hsa-miR-200a-3p|0|+1	TAACACTGTCTGGTAACGATGTT	isomiR (orphan)	end-site
hsa-miR-200a-5p|0|0	CATCTTACCGGACAGTGCTGGA	canonical miRNA
hsa-miR-200a-5p|0|-1	CATCTTACCGGACAGTGCTGG	isomiR	end-site
hsa-miR-200b-3p|0|+1	TAATACTGCCTGGTAATGATGAC	isomiR	end-site
hsa-miR-200b-3p|0|+1(+1U)	TAATACTGCCTGGTAATGATGACT	isomiR	mixed: end-site + 3' non-templated addition
hsa-miR-200b-3p|0|0	TAATACTGCCTGGTAATGATGA	canonical miRNA
hsa-miR-200b-3p|0|-1	TAATACTGCCTGGTAATGATG	isomiR	end-site
hsa-miR-200c-3p|0|0	TAATACTGCCGGGTAATGATGGA	canonical miRNA
hsa-miR-200c-3p|0|0(+1U)	TAATACTGCCGGGTAATGATGGAT	isomiR	3' non-templated addition
hsa-miR-200c-3p|0|-1	TAATACTGCCGGGTAATGATGG	isomiR	end-site
hsa-miR-200c-3p|0|-1(+1U)	TAATACTGCCGGGTAATGATGGT	isomiR	mixed: end-site + 3' non-templated addition
hsa-miR-200c-3p|0|-2	TAATACTGCCGGGTAATGATG	isomiR	end-site
hsa-miR-200c-3p|0|-5	TAATACTGCCGGGTAATG	isomiR	end-site
hsa-miR-200c-5p|0|0	CGTCTTACCCAGCAGTGTTTGG	canonical miRNA (without isomiR)
hsa-miR-203a-3p|+1|+1	TGAAATGTTTAGGACCACTAGA	isomiR	mixed: start-site + end-site
hsa-miR-203a-3p|+1|0	TGAAATGTTTAGGACCACTAG	isomiR	start-site
hsa-miR-203a-3p|+1|0(+1U)	TGAAATGTTTAGGACCACTAGT	isomiR	mixed: start-site + 3' non-templated addition
hsa-miR-203a-3p|+1|0(+2U)	TGAAATGTTTAGGACCACTAGTT	isomiR	mixed: start-site + 3' non-templated addition
hsa-miR-203a-3p|+1|-1	TGAAATGTTTAGGACCACTA	isomiR	mixed: start-site + end-site
hsa-miR-203a-3p|+1|-1(+1U)	TGAAATGTTTAGGACCACTAT	isomiR	mixed: start-site + end-site + 3' non-templated addition
hsa-miR-203a-3p|+1|-2	TGAAATGTTTAGGACCACT	isomiR	mixed: start-site + end-site
hsa-miR-203a-3p|0|+1	GTGAAATGTTTAGGACCACTAGA	isomiR	end-site
hsa-miR-203a-3p|0|0	GTGAAATGTTTAGGACCACTAG	canonical miRNA
hsa-miR-203a-3p|0|0(+1U)	GTGAAATGTTTAGGACCACTAGT	isomiR	3' non-templated addition
hsa-miR-203a-3p|0|-1	GTGAAATGTTTAGGACCACTA	isomiR	end-site
hsa-miR-203a-3p|0|-1(+1U)	GTGAAATGTTTAGGACCACTAT	isomiR	mixed: end-site + 3' non-templated addition
hsa-miR-203a-3p|0|-2	GTGAAATGTTTAGGACCACT	isomiR	end-site
hsa-miR-203a-3p|-1|+1	TGTGAAATGTTTAGGACCACTAGA	isomiR	mixed: start-site + end-site
hsa-miR-203a-3p|-1|0	TGTGAAATGTTTAGGACCACTAG	isomiR	start-site
hsa-miR-203a-3p|-2|0	TTGTGAAATGTTTAGGACCACTAG	isomiR	start-site
hsa-miR-203b-3p|0|-1	TTGAACTGTTAAGAACCACTGG	isomiR (orphan)	end-site
hsa-miR-204-3p|0|0	GCTGGGAAGGCAAAGGGACGT	canonical miRNA (without isomiR)
hsa-miR-204-5p|0|+1	TTCCCTTTGTCATCCTATGCCTG	isomiR	end-site
hsa-miR-204-5p|0|+1(+1U)	TTCCCTTTGTCATCCTATGCCTGT	isomiR	mixed: end-site + 3' non-templated addition
hsa-miR-204-5p|0|+2	TTCCCTTTGTCATCCTATGCCTGA	isomiR	end-site
hsa-miR-204-5p|0|0	TTCCCTTTGTCATCCTATGCCT	canonical miRNA
hsa-miR-204-5p|0|0(+1U)	TTCCCTTTGTCATCCTATGCCTT	isomiR	3' non-templated addition
hsa-miR-204-5p|0|0(+2U)	TTCCCTTTGTCATCCTATGCCTTT	isomiR	3' non-templated addition
hsa-miR-204-5p|0|-1	TTCCCTTTGTCATCCTATGCC	isomiR	end-site
hsa-miR-204-5p|0|-2	TTCCCTTTGTCATCCTATGC	isomiR	end-site
hsa-miR-204-5p|0|-3	TTCCCTTTGTCATCCTATG	isomiR	end-site
hsa-miR-205-5p|0|+1	TCCTTCATTCCACCGGAGTCTGT	isomiR	end-site
hsa-miR-205-5p|0|+1(+1U)	TCCTTCATTCCACCGGAGTCTGTT	isomiR	mixed: end-site + 3' non-templated addition
hsa-miR-205-5p|0|0	TCCTTCATTCCACCGGAGTCTG	canonical miRNA
hsa-miR-205-5p|0|-1	TCCTTCATTCCACCGGAGTCT	isomiR	end-site
hsa-miR-205-5p|0|-1(+1U)	TCCTTCATTCCACCGGAGTCTT	isomiR	mixed: end-site + 3' non-templated addition
hsa-miR-205-5p|0|-2	TCCTTCATTCCACCGGAGTC	isomiR	end-site
hsa-miR-205-5p|0|-3	TCCTTCATTCCACCGGAGT	isomiR	end-site
hsa-miR-206|0|0	TGGAATGTAAGGAAGTGTGTGG	canonical miRNA (without isomiR)
hsa-miR-20a-3p|+1|+1	CTGCATTATGAGCACTTAAAGT	isomiR (orphan)	mixed: start-site + end-site
hsa-miR-20a-3p|0|+1	ACTGCATTATGAGCACTTAAAGT	isomiR (orphan)	end-site
hsa-miR-20a-5p|+2|0	AAGTGCTTATAGTGCAGGTAG	isomiR	start-site
hsa-miR-20a-5p|0|+1	TAAAGTGCTTATAGTGCAGGTAGT	isomiR	end-site
hsa-miR-20a-5p|0|0	TAAAGTGCTTATAGTGCAGGTAG	canonical miRNA
hsa-miR-20a-5p|0|-1	TAAAGTGCTTATAGTGCAGGTA	isomiR	end-site
hsa-miR-20a-5p|0|-1(+1U)	TAAAGTGCTTATAGTGCAGGTAT	isomiR	mixed: end-site + 3' non-templated addition
hsa-miR-20a-5p|0|-2	TAAAGTGCTTATAGTGCAGGT	isomiR	end-site
hsa-miR-20a-5p|0|-3	TAAAGTGCTTATAGTGCAGG	isomiR	end-site
hsa-miR-20b-3p|0|+1	ACTGTAGTATGGGCACTTCCAGT	isomiR	end-site
hsa-miR-20b-3p|0|0	ACTGTAGTATGGGCACTTCCAG	canonical miRNA
hsa-miR-20b-3p|0|-1	ACTGTAGTATGGGCACTTCCA	isomiR	end-site
hsa-miR-20b-3p|0|-2	ACTGTAGTATGGGCACTTCC	isomiR	end-site
hsa-miR-20b-3p|0|-3	ACTGTAGTATGGGCACTTC	isomiR	end-site
hsa-miR-20b-5p|+1|0	AAAGTGCTCATAGTGCAGGTAG	isomiR	start-site
hsa-miR-20b-5p|+3|0	AGTGCTCATAGTGCAGGTAG	isomiR	start-site
hsa-miR-20b-5p|0|+1	CAAAGTGCTCATAGTGCAGGTAGT	isomiR	end-site
hsa-miR-20b-5p|0|0	CAAAGTGCTCATAGTGCAGGTAG	canonical miRNA
hsa-miR-20b-5p|0|-1	CAAAGTGCTCATAGTGCAGGTA	isomiR	end-site
hsa-miR-20b-5p|0|-1(+1U)	CAAAGTGCTCATAGTGCAGGTAT	isomiR	mixed: end-site + 3' non-templated addition
hsa-miR-20b-5p|0|-2	CAAAGTGCTCATAGTGCAGGT	isomiR	end-site
hsa-miR-210-3p|+1|0	TGTGCGTGTGACAGCGGCTGA	isomiR	start-site
hsa-miR-210-3p|0|+1	CTGTGCGTGTGACAGCGGCTGAT	isomiR	end-site
hsa-miR-210-3p|0|+1(+1U)	CTGTGCGTGTGACAGCGGCTGATT	isomiR	mixed: end-site + 3' non-templated addition
hsa-miR-210-3p|0|0	CTGTGCGTGTGACAGCGGCTGA	canonical miRNA
hsa-miR-210-3p|0|-1	CTGTGCGTGTGACAGCGGCTG	isomiR	end-site
hsa-miR-210-3p|0|-1(+1U)	CTGTGCGTGTGACAGCGGCTGT	isomiR	mixed: end-site + 3' non-templated addition
hsa-miR-210-3p|0|-1(+2U)	CTGTGCGTGTGACAGCGGCTGTT	isomiR	mixed: end-site + 3' non-templated addition
hsa-miR-210-3p|0|-1(+3U)	CTGTGCGTGTGACAGCGGCTGTTT	isomiR	mixed: end-site + 3' non-templated addition
hsa-miR-210-3p|0|-2	CTGTGCGTGTGACAGCGGCT	isomiR	end-site
hsa-miR-210-3p|0|-2(+1U)	CTGTGCGTGTGACAGCGGCTT	isomiR	mixed: end-site + 3' non-templated addition
hsa-miR-210-3p|0|-2(+2U)	CTGTGCGTGTGACAGCGGCTTT	isomiR	mixed: end-site + 3' non-templated addition
hsa-miR-210-3p|0|-2(+3U)	CTGTGCGTGTGACAGCGGCTTTT	isomiR	mixed: end-site + 3' non-templated addition
hsa-miR-210-3p|0|-3	CTGTGCGTGTGACAGCGGC	isomiR	end-site
hsa-miR-210-3p|0|-4	CTGTGCGTGTGACAGCGG	isomiR	end-site
hsa-miR-210-3p|-1|+1	ACTGTGCGTGTGACAGCGGCTGAT	isomiR	mixed: start-site + end-site
hsa-miR-210-3p|-1|0	ACTGTGCGTGTGACAGCGGCTGA	isomiR	start-site
hsa-miR-210-3p|-1|-1(+1U)	ACTGTGCGTGTGACAGCGGCTGT	isomiR	mixed: shifted + 3' non-templated addition
hsa-miR-2110|0|+1	TTGGGGAAACGGCCGCTGAGTGA	isomiR (orphan)	end-site
hsa-miR-211-3p|0|0	GCAGGGACAGCAAAGGGGTGC	canonical miRNA (without isomiR)
hsa-miR-211-5p|0|+1	TTCCCTTTGTCATCCTTCGCCTA	isomiR	end-site
hsa-miR-211-5p|0|+1(+1U)	TTCCCTTTGTCATCCTTCGCCTAT	isomiR	mixed: end-site + 3' non-templated addition
hsa-miR-211-5p|0|+1(+2U)	TTCCCTTTGTCATCCTTCGCCTATT	isomiR	mixed: end-site + 3' non-templated addition
hsa-miR-211-5p|0|+2	TTCCCTTTGTCATCCTTCGCCTAG	isomiR	end-site
hsa-miR-211-5p|0|0	TTCCCTTTGTCATCCTTCGCCT	canonical miRNA
hsa-miR-211-5p|0|0(+1U)	TTCCCTTTGTCATCCTTCGCCTT	isomiR	3' non-templated addition
hsa-miR-211-5p|0|0(+2U)	TTCCCTTTGTCATCCTTCGCCTTT	isomiR	3' non-templated addition
hsa-miR-211-5p|0|0(+3U)	TTCCCTTTGTCATCCTTCGCCTTTT	isomiR	3' non-templated addition
hsa-miR-211-5p|0|0(+4U)	TTCCCTTTGTCATCCTTCGCCTTTTT	isomiR	3' non-templated addition
hsa-miR-211-5p|0|-1	TTCCCTTTGTCATCCTTCGCC	isomiR	end-site
hsa-miR-211-5p|0|-2	TTCCCTTTGTCATCCTTCGC	isomiR	end-site
hsa-miR-211-5p|0|-2(+1U)	TTCCCTTTGTCATCCTTCGCT	isomiR	mixed: end-site + 3' non-templated addition
hsa-miR-211-5p|0|-3	TTCCCTTTGTCATCCTTCG	isomiR	end-site
hsa-miR-211-5p|0|-3(+1U)	TTCCCTTTGTCATCCTTCGT	isomiR	mixed: end-site + 3' non-templated addition
hsa-miR-211-5p|0|-4	TTCCCTTTGTCATCCTTC	isomiR	end-site
hsa-miR-212-3p|0|+1	TAACAGTCTCCAGTCACGGCCA	isomiR	end-site
hsa-miR-212-3p|0|+1(+1U)	TAACAGTCTCCAGTCACGGCCAT	isomiR	mixed: end-site + 3' non-templated addition
hsa-miR-212-3p|0|0	TAACAGTCTCCAGTCACGGCC	canonical miRNA
hsa-miR-212-3p|0|-2	TAACAGTCTCCAGTCACGG	isomiR	end-site
hsa-miR-214-3p|0|0	ACAGCAGGCACAGACAGGCAGT	canonical miRNA
hsa-miR-214-3p|0|-1	ACAGCAGGCACAGACAGGCAG	isomiR	end-site
hsa-miR-214-3p|-1|0	TACAGCAGGCACAGACAGGCAGT	isomiR	start-site
hsa-miR-214-3p|-1|-1	TACAGCAGGCACAGACAGGCAG	isomiR	shifted
hsa-miR-214-5p|+1|0	GCCTGTCTACACTTGCTGTGC	isomiR	start-site
hsa-miR-214-5p|0|0	TGCCTGTCTACACTTGCTGTGC	canonical miRNA
hsa-miR-214-5p|0|-1	TGCCTGTCTACACTTGCTGTG	isomiR	end-site
hsa-miR-215-5p|+1|-2	TGACCTATGAATTGACAG	isomiR	mixed: start-site + end-site
hsa-miR-215-5p|0|+1	ATGACCTATGAATTGACAGACA	isomiR	end-site
hsa-miR-215-5p|0|0	ATGACCTATGAATTGACAGAC	canonical miRNA
hsa-miR-21-5p|+1|+1	AGCTTATCAGACTGATGTTGAC	isomiR	shifted
hsa-miR-21-5p|+1|+2	AGCTTATCAGACTGATGTTGACT	isomiR	mixed: start-site + end-site
hsa-miR-21-5p|+1|0	AGCTTATCAGACTGATGTTGA	isomiR	start-site
hsa-miR-21-5p|+1|-1	AGCTTATCAGACTGATGTTG	isomiR	mixed: start-site + end-site
hsa-miR-21-5p|+2|+1	GCTTATCAGACTGATGTTGAC	isomiR	mixed: start-site + end-site
hsa-miR-21-5p|+2|+2	GCTTATCAGACTGATGTTGACT	isomiR	shifted
hsa-miR-21-5p|+2|0	GCTTATCAGACTGATGTTGA	isomiR	start-site
hsa-miR-21-5p|+2|-1	GCTTATCAGACTGATGTTG	isomiR	mixed: start-site + end-site
hsa-miR-21-5p|+3|+1	CTTATCAGACTGATGTTGAC	isomiR	mixed: start-site + end-site
hsa-miR-21-5p|+3|+2	CTTATCAGACTGATGTTGACT	isomiR	mixed: start-site + end-site
hsa-miR-21-5p|+3|0	CTTATCAGACTGATGTTGA	isomiR	start-site
hsa-miR-21-5p|+3|-1	CTTATCAGACTGATGTTG	isomiR	mixed: start-site + end-site
hsa-miR-21-5p|+4|+1	TTATCAGACTGATGTTGAC	isomiR	mixed: start-site + end-site
hsa-miR-21-5p|+4|+2	TTATCAGACTGATGTTGACT	isomiR	mixed: start-site + end-site
hsa-miR-21-5p|+4|0	TTATCAGACTGATGTTGA	isomiR	start-site
hsa-miR-21-5p|+5|+1	TATCAGACTGATGTTGAC	isomiR	mixed: start-site + end-site
hsa-miR-21-5p|+5|+2	TATCAGACTGATGTTGACT	isomiR	mixed: start-site + end-site
hsa-miR-21-5p|+5|+5	TATCAGACTGATGTTGACTGTT	isomiR	mixed: start-site + end-site
hsa-miR-21-5p|0|+1	TAGCTTATCAGACTGATGTTGAC	isomiR	end-site
hsa-miR-21-5p|0|+2	TAGCTTATCAGACTGATGTTGACT	isomiR	end-site
hsa-miR-21-5p|0|+2(+1U)	TAGCTTATCAGACTGATGTTGACTT	isomiR	mixed: end-site + 3' non-templated addition
hsa-miR-21-5p|0|+3	TAGCTTATCAGACTGATGTTGACTG	isomiR	end-site
hsa-miR-21-5p|0|+4	TAGCTTATCAGACTGATGTTGACTGT	isomiR	end-site
hsa-miR-21-5p|0|+4(+1U)	TAGCTTATCAGACTGATGTTGACTGTT	isomiR	mixed: end-site + 3' non-templated addition
hsa-miR-21-5p|0|0	TAGCTTATCAGACTGATGTTGA	canonical miRNA
hsa-miR-21-5p|0|0(+1U)	TAGCTTATCAGACTGATGTTGAT	isomiR	mixed: end-site + 3' non-templated addition
hsa-miR-21-5p|0|-1	TAGCTTATCAGACTGATGTTG	isomiR	end-site
hsa-miR-21-5p|0|-1(+1U)	TAGCTTATCAGACTGATGTTGT	isomiR	mixed: end-site + 3' non-templated addition
hsa-miR-21-5p|0|-2	TAGCTTATCAGACTGATGTT	isomiR	end-site
hsa-miR-21-5p|0|-2(+1U)	TAGCTTATCAGACTGATGTTT	isomiR	mixed: end-site + 3' non-templated addition
hsa-miR-21-5p|0|-3	TAGCTTATCAGACTGATGT	isomiR	end-site
hsa-miR-21-5p|0|-4	TAGCTTATCAGACTGATG	isomiR	end-site
hsa-miR-21-5p|-1|+1	GTAGCTTATCAGACTGATGTTGAC	isomiR	mixed: start-site + end-site
hsa-miR-21-5p|-1|0	GTAGCTTATCAGACTGATGTTGA	isomiR	start-site
hsa-miR-21-5p|-1|-1	GTAGCTTATCAGACTGATGTTG	isomiR	shifted
hsa-miR-21-5p|-1|-2	GTAGCTTATCAGACTGATGTT	isomiR	mixed: start-site + end-site
hsa-miR-21-5p|-1|-3	GTAGCTTATCAGACTGATGT	isomiR	mixed: start-site + end-site
hsa-miR-21-5p|-1|-4	GTAGCTTATCAGACTGATG	isomiR	mixed: start-site + end-site
hsa-miR-217-5p|0|0	TACTGCATCAGGAACTGATTGGA	canonical miRNA
hsa-miR-217-5p|0|-1	TACTGCATCAGGAACTGATTGG	isomiR	end-site
hsa-miR-217-5p|-1|-1	ATACTGCATCAGGAACTGATTGG	isomiR	shifted
hsa-miR-218-5p|0|+1	TTGTGCTTGATCTAACCATGTG	isomiR	end-site
hsa-miR-218-5p|0|+1(+1U)	TTGTGCTTGATCTAACCATGTGT	isomiR	mixed: end-site + 3' non-templated addition
hsa-miR-218-5p|0|+2	TTGTGCTTGATCTAACCATGTGG	isomiR	end-site
hsa-miR-218-5p|0|+3	TTGTGCTTGATCTAACCATGTGGT	isomiR	end-site
hsa-miR-218-5p|0|0	TTGTGCTTGATCTAACCATGT	canonical miRNA
hsa-miR-218-5p|0|-1	TTGTGCTTGATCTAACCATG	isomiR	end-site
hsa-miR-219a-1-3p|0|+1	AGAGTTGAGTCTGGACGTCCCGA	isomiR	end-site
hsa-miR-219a-1-3p|0|0	AGAGTTGAGTCTGGACGTCCCG	canonical miRNA
hsa-miR-219a-1-3p|0|0(+1U)	AGAGTTGAGTCTGGACGTCCCGT	isomiR	3' non-templated addition
hsa-miR-219a-2-3p|0|0	AGAATTGTGGCTGGACATCTGT	canonical miRNA
hsa-miR-219a-2-3p|0|-1	AGAATTGTGGCTGGACATCTG	isomiR	end-site
hsa-miR-221-3p|+1|0	GCTACATTGTCTGCTGGGTTTC	isomiR	start-site
hsa-miR-221-3p|+1|-1	GCTACATTGTCTGCTGGGTTT	isomiR	mixed: start-site + end-site
hsa-miR-221-3p|+1|-2	GCTACATTGTCTGCTGGGTT	isomiR	mixed: start-site + end-site
hsa-miR-221-3p|+1|-3	GCTACATTGTCTGCTGGGT	isomiR	mixed: start-site + end-site
hsa-miR-221-3p|0|+1	AGCTACATTGTCTGCTGGGTTTCA	isomiR	end-site
hsa-miR-221-3p|0|0	AGCTACATTGTCTGCTGGGTTTC	canonical miRNA
hsa-miR-221-3p|0|0(+1U)	AGCTACATTGTCTGCTGGGTTTCT	isomiR	3' non-templated addition
hsa-miR-221-3p|0|-1	AGCTACATTGTCTGCTGGGTTT	isomiR	end-site
hsa-miR-221-3p|0|-1(+1U)	AGCTACATTGTCTGCTGGGTTTT	isomiR	mixed: end-site + 3' non-templated addition
hsa-miR-221-3p|0|-1(+2U)	AGCTACATTGTCTGCTGGGTTTTT	isomiR	mixed: end-site + 3' non-templated addition
hsa-miR-221-3p|0|-2	AGCTACATTGTCTGCTGGGTT	isomiR	end-site
hsa-miR-221-3p|0|-3	AGCTACATTGTCTGCTGGGT	isomiR	end-site
hsa-miR-221-3p|0|-4	AGCTACATTGTCTGCTGGG	isomiR	end-site
hsa-miR-221-3p|0|-5	AGCTACATTGTCTGCTGG	isomiR	end-site
hsa-miR-222-3p|+1|+2	GCTACATCTGGCTACTGGGTCT	isomiR	mixed: start-site + end-site
hsa-miR-222-3p|+1|+3	GCTACATCTGGCTACTGGGTCTC	isomiR	mixed: start-site + end-site
hsa-miR-222-3p|+1|0	GCTACATCTGGCTACTGGGT	isomiR	start-site
hsa-miR-222-3p|0|+1	AGCTACATCTGGCTACTGGGTC	isomiR	end-site
hsa-miR-222-3p|0|+2	AGCTACATCTGGCTACTGGGTCT	isomiR	end-site
hsa-miR-222-3p|0|+2(+1U)	AGCTACATCTGGCTACTGGGTCTT	isomiR	mixed: end-site + 3' non-templated addition
hsa-miR-222-3p|0|+2(+2U)	AGCTACATCTGGCTACTGGGTCTTT	isomiR	mixed: end-site + 3' non-templated addition
hsa-miR-222-3p|0|+3	AGCTACATCTGGCTACTGGGTCTC	isomiR	end-site
hsa-miR-222-3p|0|+4	AGCTACATCTGGCTACTGGGTCTCT	isomiR	end-site
hsa-miR-222-3p|0|+4(+1U)	AGCTACATCTGGCTACTGGGTCTCTT	isomiR	mixed: end-site + 3' non-templated addition
hsa-miR-222-3p|0|0	AGCTACATCTGGCTACTGGGT	canonical miRNA
hsa-miR-222-3p|0|-1	AGCTACATCTGGCTACTGGG	isomiR	end-site
hsa-miR-222-3p|0|-2	AGCTACATCTGGCTACTGG	isomiR	end-site
hsa-miR-222-5p|+1|+1	TCAGTAGCCAGTGTAGATCCTG	isomiR (orphan)	shifted
hsa-miR-222-5p|0|-1	CTCAGTAGCCAGTGTAGATCC	isomiR (orphan)	end-site
hsa-miR-222-5p|0|-2	CTCAGTAGCCAGTGTAGATC	isomiR (orphan)	end-site
hsa-miR-222-5p|-2|-1	GGCTCAGTAGCCAGTGTAGATCC	isomiR (orphan)	mixed: start-site + end-site
hsa-miR-222-5p|-2|-2	GGCTCAGTAGCCAGTGTAGATC	isomiR (orphan)	shifted
hsa-miR-222-5p|-2|-4	GGCTCAGTAGCCAGTGTAGA	isomiR (orphan)	mixed: start-site + end-site
hsa-miR-223-3p|+1|+1	GTCAGTTTGTCAAATACCCCAA	isomiR	shifted
hsa-miR-223-3p|+1|+1(+1U)	GTCAGTTTGTCAAATACCCCAAT	isomiR	mixed: shifted + 3' non-templated addition
hsa-miR-223-3p|+1|+2	GTCAGTTTGTCAAATACCCCAAG	isomiR	mixed: start-site + end-site
hsa-miR-223-3p|+1|0	GTCAGTTTGTCAAATACCCCA	isomiR	start-site
hsa-miR-223-3p|+1|0(+1U)	GTCAGTTTGTCAAATACCCCAT	isomiR	mixed: start-site + 3' non-templated addition
hsa-miR-223-3p|+1|-1	GTCAGTTTGTCAAATACCCC	isomiR	mixed: start-site + end-site
hsa-miR-223-3p|0|+1	TGTCAGTTTGTCAAATACCCCAA	isomiR	end-site
hsa-miR-223-3p|0|+1(+1U)	TGTCAGTTTGTCAAATACCCCAAT	isomiR	mixed: end-site + 3' non-templated addition
hsa-miR-223-3p|0|+2	TGTCAGTTTGTCAAATACCCCAAG	isomiR	end-site
hsa-miR-223-3p|0|0	TGTCAGTTTGTCAAATACCCCA	canonical miRNA
hsa-miR-223-3p|0|0(+1U)	TGTCAGTTTGTCAAATACCCCAT	isomiR	3' non-templated addition
hsa-miR-223-3p|0|0(+2U)	TGTCAGTTTGTCAAATACCCCATT	isomiR	3' non-templated addition
hsa-miR-223-3p|0|-1	TGTCAGTTTGTCAAATACCCC	isomiR	end-site
hsa-miR-223-3p|0|-1(+1U)	TGTCAGTTTGTCAAATACCCCT	isomiR	mixed: end-site + 3' non-templated addition
hsa-miR-223-3p|0|-2	TGTCAGTTTGTCAAATACCC	isomiR	end-site
hsa-miR-223-3p|0|-3	TGTCAGTTTGTCAAATACC	isomiR	end-site
hsa-miR-223-3p|-1|0	GTGTCAGTTTGTCAAATACCCCA	isomiR	start-site
hsa-miR-223-5p|0|+1	CGTGTATTTGACAAGCTGAGTTG	isomiR (orphan)	end-site
hsa-miR-223-5p|0|+2	CGTGTATTTGACAAGCTGAGTTGG	isomiR (orphan)	end-site
hsa-miR-22-3p|+1|+1	AGCTGCCAGTTGAAGAACTGTT	isomiR	shifted
hsa-miR-22-3p|+1|+1(+1U)	AGCTGCCAGTTGAAGAACTGTTT	isomiR	mixed: shifted + 3' non-templated addition
hsa-miR-22-3p|+1|0	AGCTGCCAGTTGAAGAACTGT	isomiR	start-site
hsa-miR-22-3p|+1|-1	AGCTGCCAGTTGAAGAACTG	isomiR	mixed: start-site + end-site
hsa-miR-22-3p|+1|-2	AGCTGCCAGTTGAAGAACT	isomiR	mixed: start-site + end-site
hsa-miR-22-3p|+2|+1	GCTGCCAGTTGAAGAACTGTT	isomiR	mixed: start-site + end-site
hsa-miR-22-3p|+2|0	GCTGCCAGTTGAAGAACTGT	isomiR	start-site
hsa-miR-22-3p|+2|-1	GCTGCCAGTTGAAGAACTG	isomiR	mixed: start-site + end-site
hsa-miR-22-3p|+3|0	CTGCCAGTTGAAGAACTGT	isomiR	start-site
hsa-miR-22-3p|0|+1	AAGCTGCCAGTTGAAGAACTGTT	isomiR	end-site
hsa-miR-22-3p|0|+1(+1U)	AAGCTGCCAGTTGAAGAACTGTTT	isomiR	mixed: end-site + 3' non-templated addition
hsa-miR-22-3p|0|+2	AAGCTGCCAGTTGAAGAACTGTTG	isomiR	end-site
hsa-miR-22-3p|0|0	AAGCTGCCAGTTGAAGAACTGT	canonical miRNA
hsa-miR-22-3p|0|-1	AAGCTGCCAGTTGAAGAACTG	isomiR	end-site
hsa-miR-22-3p|0|-2	AAGCTGCCAGTTGAAGAACT	isomiR	end-site
hsa-miR-22-3p|0|-2(+1U)	AAGCTGCCAGTTGAAGAACTT	isomiR	mixed: end-site + 3' non-templated addition
hsa-miR-22-3p|0|-2(+2U)	AAGCTGCCAGTTGAAGAACTTT	isomiR	mixed: end-site + 3' non-templated addition
hsa-miR-22-3p|0|-3	AAGCTGCCAGTTGAAGAAC	isomiR	end-site
hsa-miR-22-3p|0|-4	AAGCTGCCAGTTGAAGAA	isomiR	end-site
hsa-miR-22-3p|0|-4(+1U)	AAGCTGCCAGTTGAAGAAT	isomiR	mixed: end-site + 3' non-templated addition
hsa-miR-22-3p|0|-4(+4U)	AAGCTGCCAGTTGAAGAATTTT	isomiR	mixed: end-site + 3' non-templated addition
hsa-miR-22-3p|-1|0	AAAGCTGCCAGTTGAAGAACTGT	isomiR	start-site
hsa-miR-224-5p|+1|0	CAAGTCACTAGTGGTTCCGTTTAG	isomiR (orphan)	start-site
hsa-miR-224-5p|+1|-1	CAAGTCACTAGTGGTTCCGTTTA	isomiR (orphan)	mixed: start-site + end-site
hsa-miR-224-5p|+1|-2	CAAGTCACTAGTGGTTCCGTTT	isomiR (orphan)	mixed: start-site + end-site
hsa-miR-22-5p|0|0	AGTTCTTCAGTGGCAAGCTTTA	canonical miRNA
hsa-miR-22-5p|0|-1	AGTTCTTCAGTGGCAAGCTTT	isomiR	end-site
hsa-miR-22-5p|0|-2	AGTTCTTCAGTGGCAAGCTT	isomiR	end-site
hsa-miR-2277-5p|0|-2	AGCGCGGGCTGAGCGCTGCCAG	isomiR (orphan)	end-site
hsa-miR-2355-3p|+2|+1	TGTCCTTGCTGTTTGGAGATA	isomiR	mixed: start-site + end-site
hsa-miR-2355-3p|0|0	ATTGTCCTTGCTGTTTGGAGAT	canonical miRNA
hsa-miR-2355-5p|0|+1	ATCCCCAGATACAATGGACAAT	isomiR	end-site
hsa-miR-2355-5p|0|+2	ATCCCCAGATACAATGGACAATA	isomiR	end-site
hsa-miR-2355-5p|0|0	ATCCCCAGATACAATGGACAA	canonical miRNA
hsa-miR-2355-5p|0|-1	ATCCCCAGATACAATGGACA	isomiR	end-site
hsa-miR-2355-5p|0|-2	ATCCCCAGATACAATGGAC	isomiR	end-site
hsa-miR-23a-3p|+1|+1	TCACATTGCCAGGGATTTCCA	isomiR	shifted
hsa-miR-23a-3p|+1|+1(+1U)	TCACATTGCCAGGGATTTCCAT	isomiR	mixed: shifted + 3' non-templated addition
hsa-miR-23a-3p|+1|+2	TCACATTGCCAGGGATTTCCAA	isomiR	mixed: start-site + end-site
hsa-miR-23a-3p|+1|+2(+1U)	TCACATTGCCAGGGATTTCCAAT	isomiR	mixed: start-site + end-site + 3' non-templated addition
hsa-miR-23a-3p|+1|+3	TCACATTGCCAGGGATTTCCAAC	isomiR	mixed: start-site + end-site
hsa-miR-23a-3p|+1|+3(+1U)	TCACATTGCCAGGGATTTCCAACT	isomiR	mixed: start-site + end-site + 3' non-templated addition
hsa-miR-23a-3p|+1|0	TCACATTGCCAGGGATTTCC	isomiR	start-site
hsa-miR-23a-3p|+1|-1	TCACATTGCCAGGGATTTC	isomiR	mixed: start-site + end-site
hsa-miR-23a-3p|+1|-2	TCACATTGCCAGGGATTT	isomiR	mixed: start-site + end-site
hsa-miR-23a-3p|+2|+1	CACATTGCCAGGGATTTCCA	isomiR	mixed: start-site + end-site
hsa-miR-23a-3p|+2|+1(+1U)	CACATTGCCAGGGATTTCCAT	isomiR	mixed: start-site + end-site + 3' non-templated addition
hsa-miR-23a-3p|+2|+2	CACATTGCCAGGGATTTCCAA	isomiR	shifted
hsa-miR-23a-3p|+2|+2(+1U)	CACATTGCCAGGGATTTCCAAT	isomiR	mixed: shifted + 3' non-templated addition
hsa-miR-23a-3p|+2|0	CACATTGCCAGGGATTTCC	isomiR	start-site
hsa-miR-23a-3p|+2|-1	CACATTGCCAGGGATTTC	isomiR	mixed: start-site + end-site
hsa-miR-23a-3p|0|+1	ATCACATTGCCAGGGATTTCCA	isomiR	end-site
hsa-miR-23a-3p|0|+1(+1U)	ATCACATTGCCAGGGATTTCCAT	isomiR	mixed: end-site + 3' non-templated addition
hsa-miR-23a-3p|0|+1(+2U)	ATCACATTGCCAGGGATTTCCATT	isomiR	mixed: end-site + 3' non-templated addition
hsa-miR-23a-3p|0|+2	ATCACATTGCCAGGGATTTCCAA	isomiR	end-site
hsa-miR-23a-3p|0|+2(+1U)	ATCACATTGCCAGGGATTTCCAAT	isomiR	mixed: end-site + 3' non-templated addition
hsa-miR-23a-3p|0|+2(+2U)	ATCACATTGCCAGGGATTTCCAATT	isomiR	mixed: end-site + 3' non-templated addition
hsa-miR-23a-3p|0|+3	ATCACATTGCCAGGGATTTCCAAC	isomiR	end-site
hsa-miR-23a-3p|0|0	ATCACATTGCCAGGGATTTCC	canonical miRNA
hsa-miR-23a-3p|0|0(+1U)	ATCACATTGCCAGGGATTTCCT	isomiR	3' non-templated addition
hsa-miR-23a-3p|0|0(+2U)	ATCACATTGCCAGGGATTTCCTT	isomiR	3' non-templated addition
hsa-miR-23a-3p|0|-1	ATCACATTGCCAGGGATTTC	isomiR	end-site
hsa-miR-23a-3p|0|-1(+1U)	ATCACATTGCCAGGGATTTCT	isomiR	mixed: end-site + 3' non-templated addition
hsa-miR-23a-3p|0|-2	ATCACATTGCCAGGGATTT	isomiR	end-site
hsa-miR-23a-3p|0|-2(+1U)	ATCACATTGCCAGGGATTTT	isomiR	mixed: end-site + 3' non-templated addition
hsa-miR-23a-3p|0|-3	ATCACATTGCCAGGGATT	isomiR	end-site
hsa-miR-23a-3p|-1|+1	AATCACATTGCCAGGGATTTCCA	isomiR	mixed: start-site + end-site
hsa-miR-23a-3p|-1|0	AATCACATTGCCAGGGATTTCC	isomiR	start-site
hsa-miR-23a-3p|-1|-1	AATCACATTGCCAGGGATTTC	isomiR	shifted
hsa-miR-23a-3p|-1|-2	AATCACATTGCCAGGGATTT	isomiR	mixed: start-site + end-site
hsa-miR-23a-3p|-1|-3	AATCACATTGCCAGGGATT	isomiR	mixed: start-site + end-site
hsa-miR-23a-5p|0|0	GGGGTTCCTGGGGATGGGATTT	canonical miRNA
hsa-miR-23a-5p|0|-1	GGGGTTCCTGGGGATGGGATT	isomiR	end-site
hsa-miR-23b-3p|+1|+1	TCACATTGCCAGGGATTACCACG	isomiR	shifted
hsa-miR-23b-3p|+1|0	TCACATTGCCAGGGATTACCAC	isomiR	start-site
hsa-miR-23b-3p|+1|0(+1U)	TCACATTGCCAGGGATTACCACT	isomiR	mixed: start-site + 3' non-templated addition
hsa-miR-23b-3p|+1|0(+2U)	TCACATTGCCAGGGATTACCACTT	isomiR	mixed: start-site + 3' non-templated addition
hsa-miR-23b-3p|+1|-1	TCACATTGCCAGGGATTACCA	isomiR	mixed: start-site + end-site
hsa-miR-23b-3p|+1|-1(+1U)	TCACATTGCCAGGGATTACCAT	isomiR	mixed: start-site + end-site + 3' non-templated addition
hsa-miR-23b-3p|+1|-1(+2U)	TCACATTGCCAGGGATTACCATT	isomiR	mixed: start-site + end-site + 3' non-templated addition
hsa-miR-23b-3p|+1|-2	TCACATTGCCAGGGATTACC	isomiR	mixed: start-site + end-site
hsa-miR-23b-3p|+1|-3	TCACATTGCCAGGGATTAC	isomiR	mixed: start-site + end-site
hsa-miR-23b-3p|+2|0	CACATTGCCAGGGATTACCAC	isomiR	start-site
hsa-miR-23b-3p|+2|0(+1U)	CACATTGCCAGGGATTACCACT	isomiR	mixed: start-site + 3' non-templated addition
hsa-miR-23b-3p|+2|-1	CACATTGCCAGGGATTACCA	isomiR	mixed: start-site + end-site
hsa-miR-23b-3p|+2|-2	CACATTGCCAGGGATTACC	isomiR	mixed: start-site + end-site
hsa-miR-23b-3p|0|+1	ATCACATTGCCAGGGATTACCACG	isomiR	end-site
hsa-miR-23b-3p|0|0	ATCACATTGCCAGGGATTACCAC	canonical miRNA
hsa-miR-23b-3p|0|0(+1U)	ATCACATTGCCAGGGATTACCACT	isomiR	3' non-templated addition
hsa-miR-23b-3p|0|0(+2U)	ATCACATTGCCAGGGATTACCACTT	isomiR	3' non-templated addition
hsa-miR-23b-3p|0|-1	ATCACATTGCCAGGGATTACCA	isomiR	end-site
hsa-miR-23b-3p|0|-1(+1U)	ATCACATTGCCAGGGATTACCAT	isomiR	mixed: end-site + 3' non-templated addition
hsa-miR-23b-3p|0|-1(+2U)	ATCACATTGCCAGGGATTACCATT	isomiR	mixed: end-site + 3' non-templated addition
hsa-miR-23b-3p|0|-2	ATCACATTGCCAGGGATTACC	isomiR	end-site
hsa-miR-23b-3p|0|-2(+1U)	ATCACATTGCCAGGGATTACCT	isomiR	mixed: end-site + 3' non-templated addition
hsa-miR-23b-3p|0|-3	ATCACATTGCCAGGGATTAC	isomiR	end-site
hsa-miR-23b-3p|0|-3(+1U)	ATCACATTGCCAGGGATTACT	isomiR	mixed: end-site + 3' non-templated addition
hsa-miR-23b-3p|0|-4	ATCACATTGCCAGGGATTA	isomiR	end-site
hsa-miR-23b-3p|0|-4(+1U)	ATCACATTGCCAGGGATTAT	isomiR	mixed: end-site + 3' non-templated addition
hsa-miR-23b-3p|-1|-2	AATCACATTGCCAGGGATTACC	isomiR	mixed: start-site + end-site
hsa-miR-24-1-5p|-1|0	GTGCCTACTGAGCTGATATCAGT	isomiR (orphan)	start-site
hsa-miR-24-1-5p|-1|-1	GTGCCTACTGAGCTGATATCAG	isomiR (orphan)	shifted
hsa-miR-24-1-5p|-1|-2	GTGCCTACTGAGCTGATATCA	isomiR (orphan)	mixed: start-site + end-site
hsa-miR-24-1-5p|-2|-2	GGTGCCTACTGAGCTGATATCA	isomiR (orphan)	shifted
hsa-miR-24-2-5p|-1|+1	GTGCCTACTGAGCTGAAACACAGT	isomiR (orphan)	mixed: start-site + end-site
hsa-miR-24-2-5p|-1|0	GTGCCTACTGAGCTGAAACACAG	isomiR (orphan)	start-site
hsa-miR-24-2-5p|-1|-1	GTGCCTACTGAGCTGAAACACA	isomiR (orphan)	shifted
hsa-miR-24-2-5p|-1|-2	GTGCCTACTGAGCTGAAACAC	isomiR (orphan)	mixed: start-site + end-site
hsa-miR-24-3p|+1|0	GGCTCAGTTCAGCAGGAACAG	isomiR	start-site
hsa-miR-24-3p|+1|0(+1U)	GGCTCAGTTCAGCAGGAACAGT	isomiR	mixed: start-site + 3' non-templated addition
hsa-miR-24-3p|+1|-1	GGCTCAGTTCAGCAGGAACA	isomiR	mixed: start-site + end-site
hsa-miR-24-3p|+1|-2	GGCTCAGTTCAGCAGGAAC	isomiR	mixed: start-site + end-site
hsa-miR-24-3p|+2|+1	GCTCAGTTCAGCAGGAACAGG	isomiR	mixed: start-site + end-site
hsa-miR-24-3p|+2|+1(+1U)	GCTCAGTTCAGCAGGAACAGGT	isomiR	mixed: start-site + end-site + 3' non-templated addition
hsa-miR-24-3p|+2|0	GCTCAGTTCAGCAGGAACAG	isomiR	start-site
hsa-miR-24-3p|+2|0(+1U)	GCTCAGTTCAGCAGGAACAGT	isomiR	mixed: start-site + 3' non-templated addition
hsa-miR-24-3p|+2|0(+2U)	GCTCAGTTCAGCAGGAACAGTT	isomiR	mixed: start-site + 3' non-templated addition
hsa-miR-24-3p|+3|0	CTCAGTTCAGCAGGAACAG	isomiR	start-site
hsa-miR-24-3p|+3|0(+1U)	CTCAGTTCAGCAGGAACAGT	isomiR	mixed: start-site + 3' non-templated addition
hsa-miR-24-3p|+3|-1	CTCAGTTCAGCAGGAACA	isomiR	mixed: start-site + end-site
hsa-miR-24-3p|0|+1	TGGCTCAGTTCAGCAGGAACAGG	isomiR	end-site
hsa-miR-24-3p|0|0	TGGCTCAGTTCAGCAGGAACAG	canonical miRNA
hsa-miR-24-3p|0|0(+1U)	TGGCTCAGTTCAGCAGGAACAGT	isomiR	3' non-templated addition
hsa-miR-24-3p|0|0(+2U)	TGGCTCAGTTCAGCAGGAACAGTT	isomiR	3' non-templated addition
hsa-miR-24-3p|0|0(+3U)	TGGCTCAGTTCAGCAGGAACAGTTT	isomiR	3' non-templated addition
hsa-miR-24-3p|0|-1	TGGCTCAGTTCAGCAGGAACA	isomiR	end-site
hsa-miR-24-3p|0|-1(+1U)	TGGCTCAGTTCAGCAGGAACAT	isomiR	mixed: end-site + 3' non-templated addition
hsa-miR-24-3p|0|-1(+2U)	TGGCTCAGTTCAGCAGGAACATT	isomiR	mixed: end-site + 3' non-templated addition
hsa-miR-24-3p|0|-2	TGGCTCAGTTCAGCAGGAAC	isomiR	end-site
hsa-miR-24-3p|0|-2(+1U)	TGGCTCAGTTCAGCAGGAACT	isomiR	mixed: end-site + 3' non-templated addition
hsa-miR-24-3p|0|-3	TGGCTCAGTTCAGCAGGAA	isomiR	end-site
hsa-miR-24-3p|0|-3(+1U)	TGGCTCAGTTCAGCAGGAAT	isomiR	mixed: end-site + 3' non-templated addition
hsa-miR-24-3p|0|-4	TGGCTCAGTTCAGCAGGA	isomiR	end-site
hsa-miR-24-3p|0|-4(+1U)	TGGCTCAGTTCAGCAGGAT	isomiR	mixed: end-site + 3' non-templated addition
hsa-miR-24-3p|0|-4(+2U)	TGGCTCAGTTCAGCAGGATT	isomiR	mixed: end-site + 3' non-templated addition
hsa-miR-24-3p|-1|0	CTGGCTCAGTTCAGCAGGAACAG	isomiR	start-site
hsa-miR-24-3p|-1|0(+1U)	CTGGCTCAGTTCAGCAGGAACAGT	isomiR	mixed: start-site + 3' non-templated addition
hsa-miR-24-3p|-1|-1	CTGGCTCAGTTCAGCAGGAACA	isomiR	shifted
hsa-miR-24-3p|-1|-2	CTGGCTCAGTTCAGCAGGAAC	isomiR	mixed: start-site + end-site
hsa-miR-25-3p|+1|0	ATTGCACTTGTCTCGGTCTGA	isomiR	start-site
hsa-miR-25-3p|+1|0(+1U)	ATTGCACTTGTCTCGGTCTGAT	isomiR	mixed: start-site + 3' non-templated addition
hsa-miR-25-3p|+1|-1	ATTGCACTTGTCTCGGTCTG	isomiR	mixed: start-site + end-site
hsa-miR-25-3p|+1|-1(+1U)	ATTGCACTTGTCTCGGTCTGT	isomiR	mixed: start-site + end-site + 3' non-templated addition
hsa-miR-25-3p|+2|0	TTGCACTTGTCTCGGTCTGA	isomiR	start-site
hsa-miR-25-3p|+3|0	TGCACTTGTCTCGGTCTGA	isomiR	start-site
hsa-miR-25-3p|+4|0	GCACTTGTCTCGGTCTGA	isomiR	start-site
hsa-miR-25-3p|0|+1	CATTGCACTTGTCTCGGTCTGAC	isomiR	end-site
hsa-miR-25-3p|0|+1(+1U)	CATTGCACTTGTCTCGGTCTGACT	isomiR	mixed: end-site + 3' non-templated addition
hsa-miR-25-3p|0|+2	CATTGCACTTGTCTCGGTCTGACA	isomiR	end-site
hsa-miR-25-3p|0|0	CATTGCACTTGTCTCGGTCTGA	canonical miRNA
hsa-miR-25-3p|0|0(+1U)	CATTGCACTTGTCTCGGTCTGAT	isomiR	3' non-templated addition
hsa-miR-25-3p|0|0(+2U)	CATTGCACTTGTCTCGGTCTGATT	isomiR	3' non-templated addition
hsa-miR-25-3p|0|0(+3U)	CATTGCACTTGTCTCGGTCTGATTT	isomiR	3' non-templated addition
hsa-miR-25-3p|0|-1	CATTGCACTTGTCTCGGTCTG	isomiR	end-site
hsa-miR-25-3p|0|-1(+1U)	CATTGCACTTGTCTCGGTCTGT	isomiR	mixed: end-site + 3' non-templated addition
hsa-miR-25-3p|0|-1(+2U)	CATTGCACTTGTCTCGGTCTGTT	isomiR	mixed: end-site + 3' non-templated addition
hsa-miR-25-3p|0|-1(+3U)	CATTGCACTTGTCTCGGTCTGTTT	isomiR	mixed: end-site + 3' non-templated addition
hsa-miR-25-3p|0|-2	CATTGCACTTGTCTCGGTCT	isomiR	end-site
hsa-miR-25-3p|0|-2(+1U)	CATTGCACTTGTCTCGGTCTT	isomiR	mixed: end-site + 3' non-templated addition
hsa-miR-25-3p|0|-2(+2U)	CATTGCACTTGTCTCGGTCTTT	isomiR	mixed: end-site + 3' non-templated addition
hsa-miR-25-3p|0|-3	CATTGCACTTGTCTCGGTC	isomiR	end-site
hsa-miR-25-3p|0|-4	CATTGCACTTGTCTCGGT	isomiR	end-site
hsa-miR-25-5p|0|0	AGGCGGAGACTTGGGCAATTG	canonical miRNA (without isomiR)
hsa-miR-26a-1-3p|0|0	CCTATTCTTGGTTACTTGCACG	canonical miRNA (without isomiR)
hsa-miR-26a-2-3p|0|0	CCTATTCTTGATTACTTGTTTC	canonical miRNA (without isomiR)
hsa-miR-26a-5p|+1|+2	TCAAGTAATCCAGGATAGGCTGT	isomiR	mixed: start-site + end-site
hsa-miR-26a-5p|+1|-2	TCAAGTAATCCAGGATAGG	isomiR	mixed: start-site + end-site
hsa-miR-26a-5p|0|+1	TTCAAGTAATCCAGGATAGGCTG	isomiR	end-site
hsa-miR-26a-5p|0|+2	TTCAAGTAATCCAGGATAGGCTGT	isomiR	end-site
hsa-miR-26a-5p|0|+3	TTCAAGTAATCCAGGATAGGCTGTT	isomiR	mixed: end-site + 3' non-templated addition
hsa-miR-26a-5p|0|0	TTCAAGTAATCCAGGATAGGCT	canonical miRNA
hsa-miR-26a-5p|0|0(+1U)	TTCAAGTAATCCAGGATAGGCTT	isomiR	3' non-templated addition
hsa-miR-26a-5p|0|0(+2U)	TTCAAGTAATCCAGGATAGGCTTT	isomiR	3' non-templated addition
hsa-miR-26a-5p|0|-1	TTCAAGTAATCCAGGATAGGC	isomiR	end-site
hsa-miR-26a-5p|0|-2	TTCAAGTAATCCAGGATAGG	isomiR	end-site
hsa-miR-26a-5p|0|-2(+1U)	TTCAAGTAATCCAGGATAGGT	isomiR	mixed: end-site + 3' non-templated addition
hsa-miR-26a-5p|0|-3	TTCAAGTAATCCAGGATAG	isomiR	end-site
hsa-miR-26a-5p|0|-3(+1U)	TTCAAGTAATCCAGGATAGT	isomiR	mixed: end-site + 3' non-templated addition
hsa-miR-26a-5p|0|-4	TTCAAGTAATCCAGGATA	isomiR	end-site
hsa-miR-26a-5p|0|-4(+1U)	TTCAAGTAATCCAGGATAT	isomiR	mixed: end-site + 3' non-templated addition
hsa-miR-26b-3p|0|+1	CCTGTTCTCCATTACTTGGCTC	isomiR	end-site
hsa-miR-26b-3p|0|+1(+1U)	CCTGTTCTCCATTACTTGGCTCT	isomiR	mixed: end-site + 3' non-templated addition
hsa-miR-26b-3p|0|0	CCTGTTCTCCATTACTTGGCT	canonical miRNA
hsa-miR-26b-3p|0|0(+1U)	CCTGTTCTCCATTACTTGGCTT	isomiR	3' non-templated addition
hsa-miR-26b-3p|0|-1	CCTGTTCTCCATTACTTGGC	isomiR	end-site
hsa-miR-26b-3p|0|-2	CCTGTTCTCCATTACTTGG	isomiR	end-site
hsa-miR-26b-5p|0|+1	TTCAAGTAATTCAGGATAGGTT	isomiR	end-site
hsa-miR-26b-5p|0|+1(+1U)	TTCAAGTAATTCAGGATAGGTTT	isomiR	mixed: end-site + 3' non-templated addition
hsa-miR-26b-5p|0|+2	TTCAAGTAATTCAGGATAGGTTG	isomiR	end-site
hsa-miR-26b-5p|0|+3	TTCAAGTAATTCAGGATAGGTTGT	isomiR	end-site
hsa-miR-26b-5p|0|0	TTCAAGTAATTCAGGATAGGT	canonical miRNA
hsa-miR-26b-5p|0|-1	TTCAAGTAATTCAGGATAGG	isomiR	end-site
hsa-miR-26b-5p|0|-2	TTCAAGTAATTCAGGATAG	isomiR	end-site
hsa-miR-27a-3p|0|+1	TTCACAGTGGCTAAGTTCCGCC	isomiR	end-site
hsa-miR-27a-3p|0|0	TTCACAGTGGCTAAGTTCCGC	canonical miRNA
hsa-miR-27a-3p|0|0(+1U)	TTCACAGTGGCTAAGTTCCGCT	isomiR	3' non-templated addition
hsa-miR-27a-3p|0|-1	TTCACAGTGGCTAAGTTCCG	isomiR	end-site
hsa-miR-27a-3p|0|-1(+1U)	TTCACAGTGGCTAAGTTCCGT	isomiR	mixed: end-site + 3' non-templated addition
hsa-miR-27a-3p|0|-1(+2U)	TTCACAGTGGCTAAGTTCCGTT	isomiR	mixed: end-site + 3' non-templated addition
hsa-miR-27a-3p|0|-1(+3U)	TTCACAGTGGCTAAGTTCCGTTT	isomiR	mixed: end-site + 3' non-templated addition
hsa-miR-27a-3p|0|-2	TTCACAGTGGCTAAGTTCC	isomiR	end-site
hsa-miR-27a-3p|0|-2(+1U)	TTCACAGTGGCTAAGTTCCT	isomiR	mixed: end-site + 3' non-templated addition
hsa-miR-27a-3p|0|-2(+2U)	TTCACAGTGGCTAAGTTCCTT	isomiR	mixed: end-site + 3' non-templated addition
hsa-miR-27a-3p|0|-2(+3U)	TTCACAGTGGCTAAGTTCCTTT	isomiR	mixed: end-site + 3' non-templated addition
hsa-miR-27a-3p|0|-3	TTCACAGTGGCTAAGTTC	isomiR	end-site
hsa-miR-27a-5p|+1|0	GGGCTTAGCTGCTTGTGAGCA	isomiR	start-site
hsa-miR-27a-5p|0|0	AGGGCTTAGCTGCTTGTGAGCA	canonical miRNA
hsa-miR-27a-5p|0|-1	AGGGCTTAGCTGCTTGTGAGC	isomiR	end-site
hsa-miR-27b-3p|0|+1	TTCACAGTGGCTAAGTTCTGCA	isomiR	end-site
hsa-miR-27b-3p|0|+1(+1U)	TTCACAGTGGCTAAGTTCTGCAT	isomiR	mixed: end-site + 3' non-templated addition
hsa-miR-27b-3p|0|0	TTCACAGTGGCTAAGTTCTGC	canonical miRNA
hsa-miR-27b-3p|0|0(+1U)	TTCACAGTGGCTAAGTTCTGCT	isomiR	3' non-templated addition
hsa-miR-27b-3p|0|0(+2U)	TTCACAGTGGCTAAGTTCTGCTT	isomiR	3' non-templated addition
hsa-miR-27b-3p|0|-1	TTCACAGTGGCTAAGTTCTG	isomiR	end-site
hsa-miR-27b-3p|0|-1(+1U)	TTCACAGTGGCTAAGTTCTGT	isomiR	mixed: end-site + 3' non-templated addition
hsa-miR-27b-3p|0|-2	TTCACAGTGGCTAAGTTCT	isomiR	end-site
hsa-miR-27b-3p|0|-2(+1U)	TTCACAGTGGCTAAGTTCTT	isomiR	mixed: end-site + 3' non-templated addition
hsa-miR-27b-3p|0|-2(+2U)	TTCACAGTGGCTAAGTTCTTT	isomiR	mixed: end-site + 3' non-templated addition
hsa-miR-27b-3p|-1|+1	GTTCACAGTGGCTAAGTTCTGCA	isomiR	mixed: start-site + end-site
hsa-miR-27b-3p|-1|0	GTTCACAGTGGCTAAGTTCTGC	isomiR	start-site
hsa-miR-27b-3p|-1|-1	GTTCACAGTGGCTAAGTTCTG	isomiR	shifted
hsa-miR-27b-3p|-1|-1(+1U)	GTTCACAGTGGCTAAGTTCTGT	isomiR	mixed: shifted + 3' non-templated addition
hsa-miR-27b-3p|-1|-2	GTTCACAGTGGCTAAGTTCT	isomiR	mixed: start-site + end-site
hsa-miR-27b-5p|0|+1	AGAGCTTAGCTGATTGGTGAACA	isomiR	end-site
hsa-miR-27b-5p|0|+2	AGAGCTTAGCTGATTGGTGAACAG	isomiR	end-site
hsa-miR-27b-5p|0|0	AGAGCTTAGCTGATTGGTGAAC	canonical miRNA
hsa-miR-27b-5p|0|-1	AGAGCTTAGCTGATTGGTGAA	isomiR	end-site
hsa-miR-27b-5p|-1|0	CAGAGCTTAGCTGATTGGTGAAC	isomiR	start-site
hsa-miR-28-3p|+1|+1	ACTAGATTGTGAGCTCCTGGAG	isomiR	shifted
hsa-miR-28-3p|+1|+1(+1U)	ACTAGATTGTGAGCTCCTGGAGT	isomiR	mixed: shifted + 3' non-templated addition
hsa-miR-28-3p|+1|0	ACTAGATTGTGAGCTCCTGGA	isomiR	start-site
hsa-miR-28-3p|+1|0(+1U)	ACTAGATTGTGAGCTCCTGGAT	isomiR	mixed: start-site + 3' non-templated addition
hsa-miR-28-3p|+1|-1	ACTAGATTGTGAGCTCCTGG	isomiR	mixed: start-site + end-site
hsa-miR-28-3p|+1|-2	ACTAGATTGTGAGCTCCTG	isomiR	mixed: start-site + end-site
hsa-miR-28-3p|+2|+1	CTAGATTGTGAGCTCCTGGAG	isomiR	mixed: start-site + end-site
hsa-miR-28-3p|+2|+1(+1U)	CTAGATTGTGAGCTCCTGGAGT	isomiR	mixed: start-site + end-site + 3' non-templated addition
hsa-miR-28-3p|+2|0	CTAGATTGTGAGCTCCTGGA	isomiR	start-site
hsa-miR-28-3p|+2|-1	CTAGATTGTGAGCTCCTGG	isomiR	mixed: start-site + end-site
hsa-miR-28-3p|+3|0	TAGATTGTGAGCTCCTGGA	isomiR	start-site
hsa-miR-28-3p|0|+1	CACTAGATTGTGAGCTCCTGGAG	isomiR	end-site
hsa-miR-28-3p|0|+1(+1U)	CACTAGATTGTGAGCTCCTGGAGT	isomiR	mixed: end-site + 3' non-templated addition
hsa-miR-28-3p|0|0	CACTAGATTGTGAGCTCCTGGA	canonical miRNA
hsa-miR-28-3p|0|0(+1U)	CACTAGATTGTGAGCTCCTGGAT	isomiR	3' non-templated addition
hsa-miR-28-3p|0|0(+2U)	CACTAGATTGTGAGCTCCTGGATT	isomiR	3' non-templated addition
hsa-miR-28-3p|0|-1	CACTAGATTGTGAGCTCCTGG	isomiR	end-site
hsa-miR-28-3p|0|-1(+1U)	CACTAGATTGTGAGCTCCTGGT	isomiR	mixed: end-site + 3' non-templated addition
hsa-miR-28-3p|0|-1(+2U)	CACTAGATTGTGAGCTCCTGGTT	isomiR	mixed: end-site + 3' non-templated addition
hsa-miR-28-3p|0|-2	CACTAGATTGTGAGCTCCTG	isomiR	end-site
hsa-miR-28-3p|0|-2(+1U)	CACTAGATTGTGAGCTCCTGT	isomiR	mixed: end-site + 3' non-templated addition
hsa-miR-28-3p|0|-3	CACTAGATTGTGAGCTCCT	isomiR	end-site
hsa-miR-28-3p|-1|0	CCACTAGATTGTGAGCTCCTGGA	isomiR	start-site
hsa-miR-28-3p|-1|-1	CCACTAGATTGTGAGCTCCTGG	isomiR	shifted
hsa-miR-28-5p|+1|-1	AGGAGCTCACAGTCTATTGA	isomiR	mixed: start-site + end-site
hsa-miR-28-5p|+2|0	GGAGCTCACAGTCTATTGAG	isomiR	start-site
hsa-miR-28-5p|0|+1	AAGGAGCTCACAGTCTATTGAGT	isomiR	end-site
hsa-miR-28-5p|0|0	AAGGAGCTCACAGTCTATTGAG	canonical miRNA
hsa-miR-28-5p|0|-1	AAGGAGCTCACAGTCTATTGA	isomiR	end-site
hsa-miR-28-5p|0|-2	AAGGAGCTCACAGTCTATTG	isomiR	end-site
hsa-miR-28-5p|0|-2(+1U)	AAGGAGCTCACAGTCTATTGT	isomiR	mixed: end-site + 3' non-templated addition
hsa-miR-28-5p|0|-3	AAGGAGCTCACAGTCTATT	isomiR	end-site
hsa-miR-296-3p|+1|0	AGGGTTGGGTGGAGGCTCTCC	isomiR	start-site
hsa-miR-296-3p|+1|-1	AGGGTTGGGTGGAGGCTCTC	isomiR	mixed: start-site + end-site
hsa-miR-296-3p|+1|-2	AGGGTTGGGTGGAGGCTCT	isomiR	mixed: start-site + end-site
hsa-miR-296-3p|0|0	GAGGGTTGGGTGGAGGCTCTCC	canonical miRNA
hsa-miR-296-3p|0|-1	GAGGGTTGGGTGGAGGCTCTC	isomiR	end-site
hsa-miR-296-3p|0|-2	GAGGGTTGGGTGGAGGCTCT	isomiR	end-site
hsa-miR-296-5p|0|0	AGGGCCCCCCCTCAATCCTGT	canonical miRNA
hsa-miR-296-5p|0|-1	AGGGCCCCCCCTCAATCCTG	isomiR	end-site
hsa-miR-296-5p|-1|0	GAGGGCCCCCCCTCAATCCTGT	isomiR	start-site
hsa-miR-299-5p|0|-1	TGGTTTACCGTCCCACATACA	isomiR (orphan)	end-site
hsa-miR-299-5p|-1|-1	ATGGTTTACCGTCCCACATACA	isomiR (orphan)	shifted
hsa-miR-29a-3p|+1|-1	AGCACCATCTGAAATCGGTT	isomiR	mixed: start-site + end-site
hsa-miR-29a-3p|+2|0	GCACCATCTGAAATCGGTTA	isomiR	start-site
hsa-miR-29a-3p|+2|-1	GCACCATCTGAAATCGGTT	isomiR	mixed: start-site + end-site
hsa-miR-29a-3p|+2|-2	GCACCATCTGAAATCGGT	isomiR	mixed: start-site + end-site
hsa-miR-29a-3p|0|+1	TAGCACCATCTGAAATCGGTTAT	isomiR	end-site
hsa-miR-29a-3p|0|+1(+1U)	TAGCACCATCTGAAATCGGTTATT	isomiR	mixed: end-site + 3' non-templated addition
[truncated: 1,699 more rows]
