# Supplementary material for: MicroRNA Isoforms Contribution to Melanoma Pathogenesis
Source: Noncoding RNA. 2021 Sep 27;7(4):63. doi: 10.3390/ncrna7040063 (PMC8544706; doi:10.3390/ncrna7040063)
Supplement: Supplementary file 1 [file ncrna-07-00063-s001.zip › supplementary table 5.xlsx]

## Sheet: Sheet1
	Table S5: List of isomiR/canonical miRNA ratios in 63 fresh-frozen melanoma samples from TCGA.
IsomiRSequence	Mature microRNA name	Normalized expression isomiR (average, n=63	Normalized expression canonical miRNA (average, n=63)	Ratio isomiR/canonical miRNA
CTGTACAGCCTCCTAGCTTTC	hsa-miR-200b-3p|0|+1(+1U)	350376	5.15385	67983.3
CTGTACAGCCTCCTAGCTTT	hsa-miR-219a-1-3p|0|+1	92000.4	3.89362	23628.5
TATACAATCTACTGTCTTTCCT	hsa-miR-193a-5p|0|-2	655792	46.5161	14098.2
CTATACAATCTACTGTCTTTCC	hsa-miR-514a-3p|-3|-2	46580.9	3.83333	12151.5
CTATACAATCTACTGTCTTTCT	hsa-miR-29a-3p|+2|-2	105126	18.4407	5700.79
CTATACAATCTACTGTCTTT	hsa-miR-128-3p|0|+1	87280.6	15.5323	5619.31
GAGGTAGTAGGTTGTATAGTT	hsa-miR-29b-1-5p|0|-3	19061.9	6.43243	2963.4
GAGGTAGTAGGTTGTATAGT	hsa-miR-142-5p|-2|-2	15590.3	5.40426	2884.83
GAGGTAGTAGGTTGTATAG	hsa-miR-29b-1-5p|+1|0	17610.4	6.43243	2737.75
AGGTAGTAGGTTGTATAGTT	hsa-miR-128-3p|0|-2	38023.4	15.5323	2448.03
AGGTAGTAGGTTGTATAGT	hsa-miR-193a-5p|0|-3	112742	46.5161	2423.73
GGTAGTAGGTTGTATAGTTT	hsa-miR-181b-5p|-1|0	53487.7	22.5484	2372.13
GGTAGTAGGTTGTATAGTT	hsa-miR-200b-3p|0|-1	11695.4	5.15385	2269.27
GGTAGTAGGTTGTATAGT	hsa-miR-10b-5p|-1|0	84388.5	37.381	2257.53
GTAGTAGGTTGTATAGTT	hsa-miR-27b-3p|0|0(+1U)	17356.4	8.38889	2068.97
TGAGGTAGTAGGTTGTATAGTTT	hsa-miR-193a-3p|0|-1	111005	58.0317	1912.83
TGAGGTAGTAGGTTGTATAGTTTA	hsa-miR-29b-1-5p|0|-2	11383.9	6.43243	1769.76
TGAGGTAGTAGGTTGTATAGTTTG	hsa-miR-181b-5p|0|-2	34929.6	22.5484	1549.1
TGAGGTAGTAGGTTGTATAGTTTT	hsa-miR-514a-3p|-2|0	5927.47	3.83333	1546.3
TGAGGTAGTAGGTTGTATAGT	hsa-miR-10b-5p|0|-3(+1U)	50011.4	37.381	1337.89
TGAGGTAGTAGGTTGTATAG	hsa-let-7b-5p|+3|0	5985.81	4.68182	1278.52
TGAGGTAGTAGGTTGTATA	hsa-miR-142-5p|-2|-2(+1U)	6878.4	5.40426	1272.77
TGAGGTAGTAGGTTGTATAT	hsa-miR-20b-3p|0|-3	11604.2	9.44444	1228.68
TGAGGTAGTAGGTTGTATATT	hsa-miR-1266-5p|0|-1	6667.27	5.52273	1207.24
TGAGGTAGTAGGTTGTATATTT	hsa-miR-27b-3p|0|0(+2U)	9036.87	8.38889	1077.24
TGAGGTAGTAGGTTGTAT	hsa-miR-20a-5p|0|-1	10050.3	10.5	957.169
TGAGGTAGTAGGTTGTATT	hsa-miR-23b-3p|0|-4	28418.5	31.9355	889.872
TGAGGTAGTAGGTTGTATTT	hsa-miR-219a-1-3p|0|0(+1U)	3077.63	3.89362	790.431
GTGAGGTAGTAGGTTGTATAGTTT	hsa-miR-29b-2-5p|0|+2	3429.05	4.46154	768.58
ATGAGGTAGTAGGTTGTATAGTT	hsa-miR-296-5p|0|-1	18861.1	25.7778	731.68
GTGAGGTAGTAGGTTGTATAGTT	hsa-miR-142-3p|+1|-3	4080.43	5.82353	700.68
TTGAGGTAGTAGGTTGTATAGTT	hsa-miR-181b-5p|0|-2(+1U)	15054	22.5484	667.632
ATGAGGTAGTAGGTTGTATAGT	hsa-miR-10b-5p|0|-3(+10U)	24621.4	37.381	658.661
GTGAGGTAGTAGGTTGTATAGT	hsa-let-7a-5p|-1|-1	3992.48	6.12903	651.404
TTGAGGTAGTAGGTTGTATAGT	hsa-miR-375-3p|+1|0	4603.98	7.6	605.787
ATGAGGTAGTAGGTTGTATAG	hsa-miR-27b-3p|0|-1	4382.57	8.38889	522.426
GTGAGGTAGTAGGTTGTATAG	hsa-miR-141-3p|0|-1	2201.13	4.34615	506.454
TTGAGGTAGTAGGTTGTATAG	hsa-miR-130a-3p|0|-3	8970	18.678	480.245
GTGAGGTAGTAGGTTGTATA	hsa-miR-128-1-5p|0|-2	8345.49	18.1452	459.929
GTGAGGTAGTAGGTTGTAT	hsa-miR-1307-3p|0|-2	3814.68	8.31373	458.842
GAGGTAGTAGGTTGTGTGGTTT	hsa-let-7a-5p|+3|+1	2685.75	6.12903	438.201
GAGGTAGTAGGTTGTGTGGTT	hsa-miR-221-3p|+1|-1	11059.7	25.4828	434.009
GAGGTAGTAGGTTGTGTGGT	hsa-miR-24-3p|+2|0(+2U)	7560.33	18.6923	404.462
GAGGTAGTAGGTTGTGTGG	hsa-miR-155-5p|+1|+1	2318.87	5.92	391.702
GGTAGTAGGTTGTGTGGTTT	hsa-miR-296-5p|-1|0	9782.87	25.7778	379.508
GGTAGTAGGTTGTGTGGTT	hsa-miR-181a-5p|+2|-2	2314.05	6.14035	376.859
GGTAGTAGGTTGTGTGGT	hsa-miR-23b-3p|0|-3(+1U)	11058.8	31.9355	346.285
GTAGTAGGTTGTGTGGTTT	hsa-miR-378a-5p|+1|+2	1711.75	5.37037	318.739
GTAGTAGGTTGTGTGGTT	hsa-miR-20a-5p|0|-3	3337.21	10.5	317.829
TGAGGTAGTAGGTTGTGTGGTTT	hsa-miR-222-3p|0|+4(+1U)	3877.71	12.2727	315.962
TGAGGTAGTAGGTTGTGTGGTTTT	hsa-miR-151a-3p|0|-3(+1U)	2015.67	6.66038	302.636
TGAGGTAGTAGGTTGTGTGGTTTTT	hsa-let-7a-5p|+2|0	1822.48	6.12903	297.351
TGAGGTAGTAGGTTGTGTGGTTTTTT	hsa-miR-221-3p|+1|-2	7456.49	25.4828	292.609
TGAGGTAGTAGGTTGTGTGGTTTC	hsa-miR-181b-5p|0|-5	6218.16	22.5484	275.77
TGAGGTAGTAGGTTGTGTGGT	hsa-miR-222-3p|0|+2(+1U)	3322.19	12.2727	270.697
TGAGGTAGTAGGTTGTGTGG	hsa-miR-22-3p|0|-4	3966.17	14.7458	268.97
TGAGGTAGTAGGTTGTGTG	hsa-miR-375-3p|0|-1(+1U)	2029.75	7.6	267.072
TGAGGTAGTAGGTTGTGTGT	hsa-miR-151a-3p|-1|+1	1753.33	6.66038	263.248
TGAGGTAGTAGGTTGTGTGTT	hsa-miR-19b-3p|-1|0	4168.7	16.7667	248.63
TGAGGTAGTAGGTTGTGTGTTT	hsa-let-7a-5p|+1|-2	1462.3	6.12903	238.586
TGAGGTAGTAGGTTGTGT	hsa-miR-142-5p|-2|-4	1262.92	5.40426	233.69
TGAGGTAGTAGGTTGTGTT	hsa-miR-185-5p|0|-1	2643.35	11.386	232.159
CTGTACAACCTTCTAGCTTTC	hsa-miR-128-3p|0|+1(+1U)	3518.73	15.5323	226.543
GAGGTAGTAGGTTGTATGGTT	hsa-miR-24-3p|+1|0	3999	18.6923	213.938
TGAGGTAGTAGGTTGTATGGTTT	hsa-miR-345-5p|0|-1	1887.02	8.83333	213.624
TGAGGTAGTAGGTTGTATGGTTTT	hsa-miR-22-3p|+1|-1	3138.52	14.7458	212.842
TGAGGTAGTAGGTTGTATGGTTTA	hsa-miR-29b-1-5p|0|-4	1334.97	6.43243	207.537
TGAGGTAGTAGGTTGTATGGT	hsa-miR-148a-5p|0|-1	1093.44	5.29091	206.665
TGAGGTAGTAGGTTGTATGG	hsa-miR-767-5p|0|-1(+1U)	5541.35	26.9206	205.84
TGAGGTAGTAGGTTGTATG	hsa-miR-127-3p|+1|+1(+1U)	1664.56	8.125	204.868
TGAGGTAGTAGGTTGTATGT	hsa-miR-24-3p|+1|0(+1U)	3747.89	18.6923	200.504
TGAGGTAGTAGGTTGTATGTT	hsa-miR-1307-3p|+1|+2	1665.97	8.31373	200.388
TTGAGGTAGTAGGTTGTATGGTT	hsa-miR-484|0|-2(+1U)	1286.13	6.48276	198.392
TTGAGGTAGTAGGTTGTATGGT	hsa-miR-513c-5p|0|-2	814.081	4.175	194.989
TTGAGGTAGTAGGTTGTATGG	hsa-miR-532-5p|+1|+1	1171.18	6.15094	190.406
TTGAGGTAGTAGGTTGTATG	hsa-miR-1266-5p|0|-2	1043.29	5.52273	188.908
GTTGAGGTAGTAGGTTGTATGGT	hsa-miR-199a-5p|0|+1	1433.08	7.67742	186.662
GTTGAGGTAGTAGGTTGTATGG	hsa-miR-27b-3p|0|-2(+1U)	1556.97	8.38889	185.599
TATACGACCTGCTGCCTTTCT	hsa-miR-181b-5p|0|-1	4175.74	22.5484	185.19
TATACGACCTGCTGCCTTTC	hsa-miR-509-3p|+1|+1	1342.24	7.33333	183.032
TATACGACCTGCTGCCTTT	hsa-miR-514b-5p|0|-3	1079.84	5.95652	181.287
CTATACGACCTGCTGCCTTTCTT	hsa-miR-320a-3p|+2|0	9172.08	51.541	177.957
CTATACGACCTGCTGCCTTTC	hsa-let-7b-5p|+1|0	832.175	4.68182	177.746
CTATACGACCTGCTGCCTTT	hsa-miR-181d-5p|0|+1	490.308	2.79412	175.479
CTATACGACCTGCTGCCTTTT	hsa-miR-181b-5p|+2|+1	3916.86	22.5484	173.709
CTATACGACCTGCTGCCTTTTT	hsa-miR-22-3p|+1|+1(+1U)	2509.29	14.7458	170.17
CTATACGACCTGCTGCCTT	hsa-let-7a-5p|-1|-2	1015.62	6.12903	165.706
CTATACGACCTGCTGCCT	hsa-miR-223-3p|0|0(+1U)	1520.76	9.33333	162.939
GAGGTAGTAGGTTGCATAGTT	hsa-miR-29a-3p|0|+2	2876.65	18.4407	155.995
GAGGTAGTAGGTTGCATAGT	hsa-miR-193a-5p|0|-4(+1U)	7122	46.5161	153.108
GAGGTAGTAGGTTGCATAG	hsa-miR-1307-3p|+1|+2(+2U)	1262.37	8.31373	151.841
AGAGGTAGTAGGTTGCATAGTTT	hsa-miR-1307-3p|+1|+3(+1U)	1245.57	8.31373	149.821
AGAGGTAGTAGGTTGCATAGT	hsa-miR-1269a|0|+1	1744.87	11.7273	148.788
AGAGGTAGTAGGTTGCATAG	hsa-miR-508-3p|+2|-1	5701.4	38.5238	147.997
AGAGGTAGTAGGTTGCATA	hsa-miR-181b-5p|-1|-1	3336.17	22.5484	147.956
AGAGGTAGTAGGTTGCAT	hsa-miR-101-3p|+2|0(+1U)	6068.75	41.0806	147.728
CTATACGGCCTCCTAGCTTTCCT	hsa-miR-27b-3p|-1|0	1186.65	8.38889	141.455
CTATACGGCCTCCTAGCTTTC	hsa-miR-320a-3p|+2|0(+2U)	7275.33	51.541	141.156
CTATACGGCCTCCTAGCTTTCT	hsa-miR-582-3p|0|+2	13221	93.7917	140.961
CTATACGGCCTCCTAGCTTT	hsa-miR-128-3p|0|-3	2186.02	15.5323	140.74
GAGGTAGGAGGTTGTATAGTT	hsa-miR-1247-5p|0|-1	581.952	4.14286	140.471
TGAGGTAGGAGGTTGTATAGTTG	hsa-miR-28-3p|+1|+1(+1U)	3644.86	26.1522	139.371
TGAGGTAGGAGGTTGTATAGTTGT	hsa-miR-142-5p|-2|-3	743.635	5.40426	137.602
TGAGGTAGGAGGTTGTATAGTTGA	hsa-miR-181a-2-3p|0|-3(+1U)	1668.33	12.2667	136.005
TGAGGTAGGAGGTTGTATAGTTT	hsa-miR-1343-3p|0|-1	1454.44	11.0345	131.809
TGAGGTAGGAGGTTGTATAGTTTT	hsa-miR-582-5p|+1|0	1211.57	9.44118	128.328
TGAGGTAGGAGGTTGTATAGT	hsa-miR-4431|+1|+1	562.937	4.44737	126.577
TGAGGTAGGAGGTTGTATAG	hsa-let-7f-5p|0|-3(+1U)	1009.06	8.08333	124.833
TGAGGTAGGAGGTTGTATA	hsa-miR-92a-3p|+2|+1	647.778	5.2	124.573
TGAGGTAGGAGGTTGTATAT	hsa-miR-30d-5p|0|-1(+1U)	4848.19	39.5429	122.606
TGAGGTAGGAGGTTGTATATTT	hsa-miR-128-1-5p|0|-3	2221.47	18.1452	122.428
TGAGGTAGGAGGTTGTAT	hsa-miR-130a-3p|0|-4	2285.87	18.678	122.383
TGAGGTAGGAGGTTGTATT	hsa-miR-187-3p|0|-1(+1U)	8387.32	69.8226	120.123
GAGGTAGTAGATTGTATAGTT	hsa-miR-103a-3p|+3|0	739.381	6.18182	119.606
GAGGTAGTAGATTGTATAGT	hsa-miR-92b-3p|0|0(+3U)	444.175	3.85417	115.245
GGTAGTAGATTGTATAGTT	hsa-miR-127-3p|0|+1(+1U)	887.937	8.125	109.284
GGTAGTAGATTGTATAGT	hsa-miR-193a-3p|0|-2	6295.54	58.0317	108.484
GTAGTAGATTGTATAGTT	hsa-miR-199a-3p|-1|-4	611.778	5.75556	106.293
TAGTAGATTGTATAGTTGTGG	hsa-miR-152-3p|+1|0	538.73	5.11905	105.24
TAGTAGATTGTATAGTTGTGGG	hsa-miR-342-3p|+2|+1(+1U)	426.238	4.05405	105.139
TGAGGTAGTAGATTGTATAGTTG	hsa-miR-20a-5p|0|-1(+1U)	1076.49	10.5	102.523
TGAGGTAGTAGATTGTATAGTTT	hsa-miR-20b-3p|0|+1	941.714	9.44444	99.7109
TGAGGTAGTAGATTGTATAGTTGT	hsa-miR-155-5p|+1|-1	585.302	5.92	98.8685
TGAGGTAGTAGATTGTATAGTTGTGG	hsa-miR-151a-3p|-2|-1	649.841	6.66038	97.5682
TGAGGTAGTAGATTGTATAGT	hsa-miR-423-3p|0|-3(+1U)	897.635	9.20339	97.5331
TGAGGTAGTAGATTGTATAG	hsa-miR-133a-3p|+1|+1	937.032	9.68	96.8008
TGAGGTAGTAGATTGTATA	hsa-miR-378a-5p|+1|-1	511.175	5.37037	95.1842
TGAGGTAGTAGATTGTATAT	hsa-miR-188-5p|0|+1	572.317	6.08696	94.0236
TGAGGTAGTAGATTGTATATT	hsa-miR-514a-3p|-3|-3	359.887	3.83333	93.8836
TGAGGTAGTAGATTGTATATTT	hsa-miR-514a-5p|0|-1	21915.9	235.746	92.964
TGAGGTAGTAGATTGTAT	hsa-miR-29a-3p|0|-1(+1U)	1676.46	18.4407	90.911
ATGAGGTAGTAGATTGTATAGTT	hsa-miR-24-3p|+3|0(+1U)	1660.97	18.6923	88.8584
ATGAGGTAGTAGATTGTATAGT	hsa-miR-22-3p|-1|0	1308.46	14.7458	88.7347
ATGAGGTAGTAGATTGTATAG	hsa-miR-181a-5p|0|-2(+2U)	523.984	6.14035	85.3346
CTGTACAGGCCACTGCCTTGCT	hsa-let-7b-5p|+4|+1	394.857	4.68182	84.3384
CTGTACAGGCCACTGCCTTG	hsa-miR-28-3p|0|-1(+1U)	2172.35	26.1522	83.0657
GAGGTAGTAGTTTGTACAGTT	hsa-miR-514a-3p|-1|0	317.902	3.83333	82.9309
GGTAGTAGTTTGTACAGTT	hsa-miR-514a-3p|-2|-1(+1U)	317.887	3.83333	82.9271
GTAGTAGTTTGTACAGTT	hsa-miR-92b-3p|0|-1(+1U)	317.159	3.85417	82.2898
TGAGGTAGTAGTTTGTACAGTTT	hsa-miR-514a-3p|0|0(+1U)	302.177	3.83333	78.8289
TGAGGTAGTAGTTTGTACAGT	hsa-miR-29a-3p|0|-2	1451.87	18.4407	78.7321
TGAGGTAGTAGTTTGTACAG	hsa-miR-200c-3p|0|0(+1U)	907.524	11.5323	78.6944
TGAGGTAGTAGTTTGTACA	hsa-miR-140-3p|0|-1	1617.57	20.5968	78.5352
TGAGGTAGTAGTTTGTAC	hsa-miR-15b-5p|0|-1(+1U)	739.46	9.45455	78.2121
CTGAGGTAGTAGTTTGTACAGTT	hsa-miR-181a-5p|+1|0	470.222	6.14035	76.579
CTGAGGTAGTAGTTTGTACAGT	hsa-miR-181a-5p|+4|-1	468.667	6.14035	76.3257
CTGAGGTAGTAGTTTGTACAG	hsa-miR-22-5p|0|-1	307.095	4.08696	75.1403
CTGCGCAAGCTACTGCCTTGC	hsa-miR-24-3p|-1|0(+1U)	1404.02	18.6923	75.112
CTGCGCAAGCTACTGCCTTG	hsa-miR-484|0|-2(+2U)	485.825	6.48276	74.9412
CTGCGCAAGCTACTGCCTTGT	hsa-miR-484|0|-2	482.889	6.48276	74.4882
CTGCGCAAGCTACTGCCTTGTT	hsa-miR-127-3p|0|0(+1U)	603.079	8.125	74.2252
CTGCGCAAGCTACTGCCTT	hsa-miR-143-3p|0|-3(+2U)	18038.1	243.127	74.1922
CTGCGCAAGCTACTGCCTTT	hsa-miR-142-5p|-2|-5	391.365	5.40426	72.4179
GGTAGTAGTTTGTGCTGTTG	hsa-miR-30e-3p|0|-2	339.556	4.73333	71.7371
GGTAGTAGTTTGTGCTGTT	hsa-miR-188-5p|0|-1	435.73	6.08696	71.5842
GGTAGTAGTTTGTGCTGTTT	hsa-let-7i-3p|0|-1	369.721	5.25	70.4231
GGTAGTAGTTTGTGCTGT	hsa-miR-181b-5p|+2|-1	1583.14	22.5484	70.2109
GTAGTAGTTTGTGCTGTT	hsa-miR-140-3p|+3|+3	1421.7	20.5968	69.0253
GTAGTAGTTTGTGCTGTTT	hsa-miR-505-3p|+1|+2	729.413	10.5849	68.9106
TGAGGTAGTAGTTTGTGCTGTTG	hsa-miR-514b-5p|0|-1	403.417	5.95652	67.7269
TGAGGTAGTAGTTTGTGCTGTTGT	hsa-let-7g-5p|0|-3	270.889	4	67.7222
TGAGGTAGTAGTTTGTGCTGTTGG	hsa-miR-345-5p|0|-1(+1U)	593.841	8.83333	67.2273
TGAGGTAGTAGTTTGTGCTGTTT	hsa-miR-100-5p|0|0(+1U)	3068.67	45.8689	66.9009
TGAGGTAGTAGTTTGTGCTGTTTT	hsa-miR-199b-5p|0|-3	3343.73	50.4603	66.2645
TGAGGTAGTAGTTTGTGCTGT	hsa-miR-16-2-3p|-1|-1	738.333	11.3684	64.946
TGAGGTAGTAGTTTGTGCTG	hsa-miR-10b-5p|0|-1(+1U)	2398.41	37.381	64.1614
TGAGGTAGTAGTTTGTGCT	hsa-miR-29a-3p|0|+1	1172.49	18.4407	63.5818
TGAGGTAGTAGTTTGTGC	hsa-miR-3065-3p|0|0(+1U)	3527.98	56.3871	62.5672
ACCCGTAGATCCGAACTTGTG	hsa-miR-28-3p|0|0(+1U)	1626.62	26.1522	62.1982
ACCCGTAGATCCGAACTTGTGT	hsa-miR-103a-3p|+4|0	378.317	6.18182	61.1984
ACCCGTAGATCCGAACTTGT	hsa-let-7c-5p|0|+1	1664.36	27.2063	61.1755
ACCCGTAGATCCGAACTTG	hsa-miR-1266-5p|0|0(+1U)	336.323	5.52273	60.8979
ACCCGTAGATCCGAACTT	hsa-miR-34a-5p|-1|+1	454.238	7.58696	59.8709
CCCGTAGATCCGAACTTGTG	hsa-miR-155-5p|0|-3(+2U)	352.381	5.92	59.5238
CCCGTAGATCCGAACTTGTGT	hsa-miR-222-3p|0|+1	725.714	12.2727	59.1323
CCCGTAGATCCGAACTTGT	hsa-miR-26b-5p|0|+3	3245.63	55.2381	58.7572
CCGTAGATCCGAACTTGT	hsa-miR-1307-3p|0|-4	485.762	8.31373	58.4289
CGTAGATCCGAACTTGTG	hsa-miR-29c-5p|+2|+2	1120.7	19.1864	58.411
AACCCGTAGATCCGAACTTGTGG	hsa-miR-222-3p|0|+4	710.651	12.2727	57.9049
AACCCGTAGATCCGAACTTGTGGT	hsa-let-7a-5p|+3|-1	353.683	6.12903	57.7061
AACCCGTAGATCCGAACTTGTGT	hsa-miR-1180-3p|0|-2	5381.16	94.0476	57.2174
AACCCGTAGATCCGAACTTGTGTT	hsa-miR-151a-3p|-1|-1	380.333	6.66038	57.1039
AACCCGTAGATCCGAACTTGT	hsa-miR-30b-5p|0|-2	225.508	3.97727	56.6991
AACCCGTAGATCCGAACTTGTT	hsa-miR-140-3p|+1|+2(+1U)	1147.87	20.5968	55.7307
AACCCGTAGATCCGAACTTGTTT	hsa-miR-629-5p|-1|-1	387.921	6.96552	55.6916
AACCCGTAGATCCGAACTTG	hsa-miR-181a-2-3p|-1|-3	681.603	12.2667	55.5655
AACCCGTAGATCCGAACTT	hsa-miR-140-3p|+1|+2	1137.4	20.5968	55.2221
AACCCGTAGATCCGAACTTT	hsa-miR-191-5p|0|-3	262.381	4.88889	53.6688
AACCCGTAGATCCGAACTTTT	hsa-miR-125a-5p|0|-2(+1U)	457.097	8.56897	53.3433
AACCCGTAGATCCGAACT	hsa-miR-26b-5p|0|-2	2888.17	55.2381	52.2859
AAACCCGTAGATCCGAACTTGT	hsa-miR-363-3p|0|-1(+1U)	688	13.4182	51.2737
ACAGTACTGTGATAACTGAAT	hsa-miR-30a-3p|+1|-1	3973.94	77.5397	51.2504
ACAGTACTGTGATAACTGA	hsa-miR-10b-5p|0|-3(+2U)	1890.19	37.381	50.5656
CAGTACTGTGATAACTGAAT	hsa-miR-143-3p|0|-3(+1U)	12203.1	243.127	50.1923
CAGTACTGTGATAACTGAATT	hsa-miR-1180-3p|0|-3	4670.63	94.0476	49.6624
CAGTACTGTGATAACTGA	hsa-miR-10399-5p|0|+1(+1U)	989.032	20	49.4516
TACAGTACTGTGATAACTGAAG	hsa-miR-340-5p|0|-2	410.365	8.32	49.3227
TACAGTACTGTGATAACTGAAGT	hsa-miR-24-3p|+3|-1	918.159	18.6923	49.1196
TACAGTACTGTGATAACTGAAGA	hsa-miR-181a-2-3p|0|-4	602.19	12.2667	49.0916
TACAGTACTGTGATAACTGAAGAA	hsa-miR-508-3p|+3|0	1822.62	38.5238	47.3115
TACAGTACTGTGATAACTGAAT	hsa-miR-15b-5p|0|+1	439.905	9.45455	46.5284
TACAGTACTGTGATAACTGAATT	hsa-miR-155-5p|0|+1	274.825	5.92	46.4232
TACAGTACTGTGATAACTGA	hsa-miR-92a-3p|+2|+1(+1U)	239.73	5.2	46.102
TACAGTACTGTGATAACTGAT	hsa-miR-30d-5p|0|+2(+1U)	1813.75	39.5429	45.8679
TACAGTACTGTGATAACTGATT	hsa-miR-222-3p|0|-2	562.603	12.2727	45.8417
TACAGTACTGTGATAACTG	hsa-miR-532-5p|0|+1	275.754	6.15094	44.8312
TACAGTACTGTGATAACTGT	hsa-miR-342-3p|+2|0	181.286	4.05405	44.7171
TACAGTACTGTGATAACT	hsa-miR-182-5p|0|-3(+1U)	3893.03	88.5161	43.9811
GTACAGTACTGTGATAACTGAAG	hsa-miR-505-3p|+1|-1	460.476	10.5849	43.5031
GTACAGTACTGTGATAACTGAA	hsa-miR-509-3p|+1|0	317.613	7.33333	43.3109
GTACAGTACTGTGATAACTGAAT	hsa-miR-582-3p|+1|0	4017.19	93.7917	42.831
GTACAGTACTGTGATAACTGA	hsa-miR-342-3p|+2|+2	172.587	4.05405	42.5715
GTACAGTACTGTGATAACTGAT	hsa-miR-151a-3p|0|-3	283.435	6.66038	42.5555
GTACAGTACTGTGATAACTG	hsa-miR-185-5p|0|-1(+1U)	483.639	11.386	42.4768
GTACAGTACTGTGATAACTGT	hsa-miR-629-5p|0|+1	294.571	6.96552	42.29
GTACAGTACTGTGATAACT	hsa-miR-223-3p|0|-2	392.905	9.33333	42.0969
TGTATTCGTACTGTCTGATG	hsa-miR-148a-3p|+1|+2	1048.4	25.2381	41.5403
TATTCGTACTGTCTGATG	hsa-miR-22-5p|0|-2	169.603	4.08696	41.4986
TTGGGATGTATTCGTACTGTCTGATG	hsa-miR-22-3p|0|-2(+2U)	611.81	14.7458	41.4905
ATTACAGATTGTCTCAGAGAA	hsa-miR-181c-5p|0|+1	283.383	6.84483	41.401
ATTACAGATTGTCTCAGAGAAA	hsa-miR-21-5p|+5|+2	8138.05	197.921	41.1177
ATTACAGATTGTCTCAGAGA	hsa-miR-140-3p|+4|+2	839.365	20.5968	40.7523
TTACAGATTGTCTCAGAGAA	hsa-miR-484|0|+2	263.823	6.48276	40.696
TTACAGATTGTCTCAGAGAAA	hsa-miR-140-3p|+1|+2(+2U)	808.397	20.5968	39.2487
TTACAGATTGTCTCAGAGAAAA	hsa-miR-29c-5p|+1|-1	747.619	19.1864	38.966
TTACAGATTGTCTCAGAGA	hsa-miR-30e-5p|0|-4	618.19	15.9111	38.8528
AATTACAGATTGTCTCAGAGAA	hsa-miR-29b-1-5p|0|-1	248.683	6.43243	38.6607
AATTACAGATTGTCTCAGAGAAT	hsa-let-7b-5p|0|+2	180.016	4.68182	38.45
AATTACAGATTGTCTCAGAGAAA	hsa-miR-181a-2-3p|0|-2(+2U)	463.603	12.2667	37.7937
AATTACAGATTGTCTCAGAG	hsa-miR-629-3p|+1|-1	710	18.8649	37.6361
AAATTACAGATTGTCTCAGAGA	hsa-miR-3127-5p|0|-1	110.286	3	36.7619
AAATTACAGATTGTCTCAGAG	hsa-miR-514b-3p|0|-1	883.581	24.2143	36.4901
GCAGCATTGTACAGGGCTATGA	hsa-miR-513c-5p|0|-3	149.5	4.175	35.8084
GCAGCATTGTACAGGGCTATG	hsa-miR-142-5p|-2|-1	192.565	5.40426	35.632
GCAGCATTGTACAGGGCTATGT	hsa-miR-519c-5p|0|-2	2297.24	65.4762	35.0851
CAGCATTGTACAGGGCTATGAA	hsa-miR-1269a|-1|-1	407.429	11.7273	34.742
CAGCATTGTACAGGGCTATGAAA	hsa-miR-30d-5p|0|-2	1335.68	39.5429	33.7781
CAGCATTGTACAGGGCTATGA	hsa-miR-3200-3p|0|0(+1U)	201.492	6	33.582
CAGCATTGTACAGGGCTATGAT	hsa-miR-30e-3p|-1|-2	158.254	4.73333	33.4339
CAGCATTGTACAGGGCTATG	hsa-miR-24-3p|+2|0(+1U)	623.508	18.6923	33.3564
CAGCATTGTACAGGGCTATGT	hsa-miR-16-2-3p|-1|-2	378.758	11.3684	33.3167
AGCATTGTACAGGGCTATGA	hsa-miR-140-3p|+1|+1(+2U)	685.873	20.5968	33.3
AGCATTGTACAGGGCTATG	hsa-miR-767-5p|-1|-1	894.397	26.9206	33.2235
GCATTGTACAGGGCTATGAA	hsa-miR-187-3p|-1|-1	2308.86	69.8226	33.0675
GCATTGTACAGGGCTATGA	hsa-miR-181d-5p|0|-1	92.1707	2.79412	32.9874
GCATTGTACAGGGCTATG	hsa-miR-199a-5p|0|0(+1U)	251.873	7.67742	32.807
GCATTGTACAGGGCTATGT	hsa-miR-182-5p|0|-2(+1U)	2894.48	88.5161	32.7001
CATTGTACAGGGCTATGA	hsa-miR-767-5p|0|+2	876.556	26.9206	32.5607
AGCAGCATTGTACAGGGCTATGAA	hsa-miR-148b-5p|-1|0	1029.56	32.2951	31.8796
AGCAGCATTGTACAGGGCTATGAAT	hsa-miR-92a-3p|+2|0	162.921	5.2	31.3309
AGCAGCATTGTACAGGGCTATGAAA	hsa-miR-33a-5p|0|-1	621	19.9344	31.1521
AGCAGCATTGTACAGGGCTATGAAG	hsa-miR-574-5p|-1|-2	248.71	8	31.0887
AGCAGCATTGTACAGGGCTATGAT	hsa-miR-221-3p|0|0(+1U)	792.222	25.4828	31.0886
AGCAGCATTGTACAGGGCTATGATT	hsa-miR-509-3p|+2|+1(+1U)	226.556	7.33333	30.8939
AGCAGCATTGTACAGGGCTATG	hsa-miR-664a-3p|0|-1	510.508	16.6167	30.7226
AGCAGCATTGTACAGGGCTATGT	hsa-miR-151a-3p|-1|-1(+1U)	203.73	6.66038	30.5884
AGCAGCATTGTACAGGGCTATGTT	hsa-let-7c-5p|0|-1	826.017	27.2063	30.3612
AAGCAGCATTGTACAGGGCTATGA	hsa-miR-151a-3p|-2|-2(+1U)	202	6.66038	30.3286
AAGCAGCATTGTACAGGGCTATG	hsa-miR-103a-3p|+5|0	187.19	6.18182	30.2808
CAAATGCTCAGACTCCTGTGGTG	hsa-miR-30b-5p|0|-3	119.762	3.97727	30.1116
CAAATGCTCAGACTCCTGTGGT	hsa-miR-6724-5p|0|-1	172.095	5.83636	29.4867
CAAATGCTCAGACTCCTGTGG	hsa-miR-26b-5p|0|-1	1612.43	55.2381	29.1905
AAATGCTCAGACTCCTGTGGTG	hsa-miR-1246|+1|0	123.397	4.25	29.0345
AAATGCTCAGACTCCTGTGGTGT	hsa-let-7a-5p|+2|-1	174.048	6.12903	28.3972
AAATGCTCAGACTCCTGTGGT	hsa-let-7c-5p|0|-3(+2U)	750.789	27.2063	27.5961
AAATGCTCAGACTCCTGTGG	hsa-miR-27b-3p|0|+1	230.937	8.38889	27.5289
AATGCTCAGACTCCTGTGGTG	hsa-miR-222-3p|0|+2(+2U)	332.302	12.2727	27.0764
AATGCTCAGACTCCTGTGGT	hsa-let-7a-5p|-1|-2	165.397	6.12903	26.9858
AATGCTCAGACTCCTGTGG	hsa-miR-28-3p|+1|-1	704.127	26.1522	26.9242
ATGCTCAGACTCCTGTGGT	hsa-let-7f-5p|0|-3(+2U)	216.635	8.08333	26.8002
TCAAATGCTCAGACTCCTGTGGTG	hsa-miR-375-3p|0|0(+1U)	202.571	7.6	26.6541
TCAAATGCTCAGACTCCTGTGGTGT	hsa-miR-92a-3p|0|+1	138.27	5.2	26.5904
TCAAATGCTCAGACTCCTGTGGTT	hsa-miR-148b-3p|0|0(+2U)	857.556	32.2951	26.5538
TCAAATGCTCAGACTCCTGTGG	hsa-miR-3613-5p|0|-1	235.016	8.86792	26.5018
TCAAATGCTCAGACTCCTGTG	hsa-miR-23b-3p|0|-2	844.508	31.9355	26.4442
TCAAATGCTCAGACTCCTGTGT	hsa-miR-508-3p|+3|-1	1013.46	38.5238	26.3074
AAAGTGCTTACAGTGCAGGTAGC	hsa-miR-345-5p|0|-2	231.524	8.83333	26.2102
AAAAGTGCTTACAGTGCAGGTAGT	hsa-miR-30d-5p|0|-3(+1U)	1007.63	39.5429	25.4821
AAAAGTGCTTACAGTGCAGGTA	hsa-miR-181a-2-3p|+1|-1	311.794	12.2667	25.418
AAAAGTGCTTACAGTGCAGGT	hsa-miR-199a-3p|0|+2	143.175	5.75556	24.8759
CGCACTGTGGGTACTTGCTG	hsa-miR-199a-5p|0|-1(+1U)	190.587	7.67742	24.8244
CCGCACTGTGGGTACTTGCTGCT	hsa-let-7i-3p|0|-3	130.105	5.25	24.782
CCGCACTGTGGGTACTTGCTG	hsa-miR-34a-5p|-1|-1	185.825	7.58696	24.4927
CCGCACTGTGGGTACTTGCTGT	hsa-miR-199a-3p|+1|-1	140.603	5.75556	24.4291
CCGCACTGTGGGTACTTGCTGTT	hsa-miR-375-3p|0|-2	184.952	7.6	24.3358
CCGCACTGTGGGTACTTGCT	hsa-miR-140-3p|+1|0	500.349	20.5968	24.2926
CCGCACTGTGGGTACTTGCTT	hsa-miR-582-3p|0|-1	2243.41	93.7917	23.9191
CCGCACTGTGGGTACTTGC	hsa-miR-21-5p|+5|+5	4694.24	197.921	23.7178
CCGCACTGTGGGTACTTG	hsa-miR-22-3p|+2|-1	345.889	14.7458	23.4568
ACCGCACTGTGGGTACTTGCTGC	hsa-miR-27b-3p|0|-1(+1U)	194.889	8.38889	23.2318
ACCGCACTGTGGGTACTTGCTG	hsa-miR-425-5p|+1|0	150.254	6.53333	22.9981
ACCGCACTGTGGGTACTTGCT	hsa-let-7f-5p|0|-1	185.349	8.08333	22.9298
ACCGCACTGTGGGTACTTGC	hsa-miR-148a-5p|0|-2	120.984	5.29091	22.8664
TACCGCACTGTGGGTACTTGCTGC	hsa-miR-708-5p|0|-2	803.607	35.2381	22.8051
TACCGCACTGTGGGTACTTGCTG	hsa-miR-3065-3p|0|-1	1273.97	56.3871	22.5933
TACCGCACTGTGGGTACTTGCT	hsa-let-7e-5p|0|+2	489.921	21.7143	22.5621
TACCGCACTGTGGGTACTTGC	hsa-miR-187-3p|0|-1(+2U)	1573.56	69.8226	22.5365
TAAAGTGCTGACAGTGCAGATA	hsa-miR-34a-5p|+1|+1	169.921	7.58696	22.3964
TAAAGTGCTGACAGTGCAGATAT	hsa-miR-29a-3p|0|-4(+2U)	405.873	18.4407	22.0097
TAAAGTGCTGACAGTGCAGATAG	hsa-miR-345-5p|0|0(+1U)	194.048	8.83333	21.9677
TAAAGTGCTGACAGTGCAGATT	hsa-miR-181b-3p|0|+1	167.921	7.66667	21.9027
TAAAGTGCTGACAGTGCAGA	hsa-miR-22-3p|+1|-2	321.81	14.7458	21.8239
TAAAGTGCTGACAGTGCAG	hsa-miR-92b-3p|0|-1(+2U)	84.0476	3.85417	21.8069
AGCAGCATTGTACAGGGCTATC	hsa-miR-142-3p|+2|0	126.857	5.82353	21.7835
AGCAGCATTGTACAGGGCTATCT	hsa-miR-378a-5p|+1|0	113.651	5.37037	21.1626
AGCAGCATTGTACAGGGCTAT	hsa-miR-101-3p|+2|0(+2U)	868.27	41.0806	21.1357
AGCAGCATTGTACAGGGCTATT	hsa-let-7b-5p|0|+1(+1U)	97.6825	4.68182	20.8642
AGCAGCATTGTACAGGGCTATTT	hsa-miR-629-5p|0|-3	144.651	6.96552	20.7667
AGCAGCATTGTACAGGGCTA	hsa-miR-200c-3p|0|-1(+1U)	234.698	11.5323	20.3515
AGCAGCATTGTACAGGGCT	hsa-miR-181a-5p|+1|-1	124.698	6.14035	20.308
AGCAGCATTGTACAGGGCTT	hsa-miR-128-3p|0|+2	314.258	15.5323	20.2326
AGCAGCATTGTACAGGGCTTT	hsa-miR-4431|0|+1	89.5873	4.44737	20.1439
ACCCTGTAGATCCGAATTTGTGT	hsa-miR-200a-5p|0|-1	121.159	6.02222	20.1186
ACCCTGTAGATCCGAATTTGTGTT	hsa-let-7e-3p|0|-2	1201.22	59.7937	20.0895
ACCCTGTAGATCCGAATTTGTGTA	hsa-miR-223-3p|0|-3	187.175	9.33333	20.0544
ACCCTGTAGATCCGAATTTGTG	hsa-miR-942-5p|+2|0	266.651	13.5238	19.7171
ACCCTGTAGATCCGAATTTGT	hsa-miR-127-3p|0|-1	156.54	8.125	19.2664
ACCCTGTAGATCCGAATTTGTT	hsa-miR-30e-3p|0|-4(+1U)	90.6508	4.73333	19.1516
ACCCTGTAGATCCGAATTTGTTT	hsa-miR-30e-3p|0|-1	90.5397	4.73333	19.1281
ACCCTGTAGATCCGAATTTG	hsa-miR-181b-2-3p|0|-1	303.726	15.9245	19.0728
ACCCTGTAGATCCGAATTT	hsa-miR-30c-5p|0|+1	331.016	17.7018	18.6996
ACCCTGTAGATCCGAATTTT	hsa-miR-30e-5p|0|+2	294.508	15.9111	18.5096
ACCCTGTAGATCCGAATTTTT	hsa-miR-23a-3p|0|+2(+2U)	14483.8	792.508	18.2759
ACCCTGTAGATCCGAATT	hsa-miR-127-3p|-1|-2	147.242	8.125	18.1221
CCCTGTAGATCCGAATTTGTGT	hsa-miR-125b-5p|0|-3	157.375	8.70909	18.0702
CCCTGTAGATCCGAATTTGTG	hsa-miR-197-3p|0|0(+1U)	770.968	43.4426	17.7468
CCCTGTAGATCCGAATTTGT	hsa-miR-10b-5p|-1|-1	663.016	37.381	17.7367
CCCTGTAGATCCGAATTTG	hsa-miR-140-3p|+1|+4(+1U)	364.274	20.5968	17.686
CCTGTAGATCCGAATTTGTGT	hsa-miR-199a-3p|-1|-1(+1U)	101.032	5.75556	17.5539
CCTGTAGATCCGAATTTGTG	hsa-miR-514a-3p|0|-1	66.3729	3.83333	17.3147
CCTGTAGATCCGAATTTGT	hsa-miR-152-3p|0|+1(+1U)	88.5556	5.11905	17.2992
CTGTAGATCCGAATTTGTGT	hsa-miR-92b-3p|0|-1	66.4677	3.85417	17.2457
CTGTAGATCCGAATTTGTG	hsa-miR-1269b|0|-1(+1U)	139.143	8.07407	17.2333
CTGTAGATCCGAATTTGT	hsa-miR-708-3p|+2|+1	87.4516	5.07692	17.2253
TACCCTGTAGATCCGAATTTGTGT	hsa-miR-142-3p|+1|-2(+1U)	100.258	5.82353	17.216
TACCCTGTAGATCCGAATTTGTGTA	hsa-miR-30d-5p|0|+2(+2U)	678.556	39.5429	17.16
TACCCTGTAGATCCGAATTTGT	hsa-miR-10399-5p|0|+2	342.317	20	17.1159
TACCCTGTAGATCCGAATTTGTT	hsa-miR-34a-5p|0|-4	129.381	7.58696	17.0531
TACCCTGTAGATCCGAATTTGTTT	hsa-miR-425-5p|+1|+1	110.587	6.53333	16.9266
TACCCTGTAGATCCGAATTTG	hsa-let-7i-3p|0|-2(+1U)	88.3774	5.25	16.8338
TACCCTGTAGATCCGAATTT	hsa-miR-424-5p|0|-1	377.476	22.5091	16.7699
TACCCTGTAGATCCGAATTTT	hsa-miR-199a-3p|-1|0	96.0645	5.75556	16.6907
TACCCTGTAGATCCGAATTTTT	hsa-miR-199a-3p|+1|-3	95.4194	5.75556	16.5787
TACCCTGTAGATCCGAATT	hsa-miR-10a-5p|+1|0	2869.29	174.587	16.4347
TACCCTGTAGATCCGAAT	hsa-miR-199a-5p|+1|0	125.355	7.67742	16.3277
ATACCCTGTAGATCCGAATTTGTGT	hsa-miR-514a-3p|-2|-4	62.2542	3.83333	16.2402
ATACCCTGTAGATCCGAATTTGTG	hsa-miR-425-5p|0|+1	105.937	6.53333	16.2148
ATACCCTGTAGATCCGAATTTGT	hsa-miR-193a-5p|0|-4	754.127	46.5161	16.2122
ATACCCTGTAGATCCGAATTTG	hsa-miR-203a-3p|+1|0(+1U)	172.143	10.678	16.1213
ATACCCTGTAGATCCGAATTT	hsa-let-7f-5p|+3|-1	129.778	8.08333	16.055
ACCCTGTAGAACCGAATTTGTGT	hsa-miR-200c-3p|0|-2	185.095	11.5323	16.0502
ACCCTGTAGAACCGAATTTGTGTT	hsa-miR-1301-3p|+1|-3	746.905	46.8065	15.9573
ACCCTGTAGAACCGAATTTGTGTG	hsa-miR-24-3p|-1|-2	293.937	18.6923	15.725
ACCCTGTAGAACCGAATTTGTGTGT	hsa-miR-671-5p|0|+1	95.0794	6.10909	15.5636
ACCCTGTAGAACCGAATTTGTGTGG	hsa-miR-141-3p|0|+1	67.6393	4.34615	15.563
ACCCTGTAGAACCGAATTTGTG	hsa-miR-181a-5p|0|+2	95.3492	6.14035	15.5283
ACCCTGTAGAACCGAATTTGT	hsa-miR-26b-5p|0|+1	856.683	55.2381	15.5089
ACCCTGTAGAACCGAATTTGTT	hsa-miR-199a-3p|+3|-1	88.7903	5.75556	15.4269
ACCCTGTAGAACCGAATTTGTTT	hsa-miR-423-3p|-1|-5	140.667	9.20339	15.2842
ACCCTGTAGAACCGAATTTG	hsa-miR-4423-5p|+1|+1	180	11.7937	15.2624
ACCCTGTAGAACCGAATTT	hsa-miR-6806-3p|0|0(+1U)	94.5714	6.20339	15.2451
ACCCTGTAGAACCGAATTTT	hsa-miR-199a-3p|0|0(+1U)	86.8226	5.75556	15.085
ACCCTGTAGAACCGAATTTTT	hsa-miR-25-3p|0|+1(+1U)	734.063	49.2742	14.8975
ACCCTGTAGAACCGAATT	hsa-miR-30e-3p|0|+1	70.4032	4.73333	14.8739
CCCTGTAGAACCGAATTTGTGT	hsa-miR-30e-5p|0|-4(+1U)	236.333	15.9111	14.8534
CCCTGTAGAACCGAATTTGTG	hsa-miR-1307-3p|+1|+2(+1U)	122.82	8.31373	14.7731
CCCTGTAGAACCGAATTTGT	hsa-miR-126-5p|0|-2	1996.25	135.302	14.7541
CCCTGTAGAACCGAATTTG	hsa-miR-1269a|0|-2	172.81	11.7273	14.7357
CCTGTAGAACCGAATTTGTG	hsa-miR-142-3p|+3|+2	85.4762	5.82353	14.6777
CCTGTAGAACCGAATTTGT	hsa-miR-30d-5p|0|0(+1U)	577.381	39.5429	14.6014
CTGTAGAACCGAATTTGTG	hsa-let-7i-3p|0|-2	76.3061	5.25	14.5345
CTGTAGAACCGAATTTGT	hsa-miR-22-3p|+2|+1	213.048	14.7458	14.4481
TACCCTGTAGAACCGAATTTGTGT	hsa-miR-140-3p|+1|+3(+1U)	296	20.5968	14.3712
TACCCTGTAGAACCGAATTTGTGTT	hsa-miR-145-3p|+2|0	57.9841	4.04255	14.3434
TACCCTGTAGAACCGAATTTGT	hsa-miR-1307-3p|+1|-2	118.787	8.31373	14.288
TACCCTGTAGAACCGAATTTGTT	hsa-miR-4454|+3|+1(+1U)	97.5484	6.85106	14.2384
TACCCTGTAGAACCGAATTTGTTT	hsa-miR-181a-5p|0|-3(+1U)	87.0952	6.14035	14.1841
TACCCTGTAGAACCGAATTTG	hsa-miR-150-5p|0|0(+1U)	430.177	30.4355	14.1341
TACCCTGTAGAACCGAATTT	hsa-miR-423-3p|-1|-1	129.063	9.20339	14.0235
TACCCTGTAGAACCGAATTTTTTTTTTTTT	hsa-miR-331-3p|0|-1	590.857	42.2203	13.9946
TACCCTGTAGAACCGAATTTT	hsa-miR-455-3p|0|+1	56.3061	4.04545	13.9184
TACCCTGTAGAACCGAATTTTT	hsa-miR-28-3p|+3|0	359.016	26.1522	13.728
TACCCTGTAGAACCGAATT	hsa-miR-155-5p|+1|-3	81.2222	5.92	13.72
TACCCTGTAGAACCGAAT	hsa-miR-767-5p|0|0(+1U)	369.016	26.9206	13.7075
ATACCCTGTAGAACCGAATTTGTG	hsa-miR-126-3p|+1|0(+1U)	79.5238	5.80328	13.7033
ATACCCTGTAGAACCGAATTTGT	hsa-miR-92a-3p|+1|-1	70.9365	5.2	13.6416
TTTCCGGCTCGCGTGGGTGTGTT	hsa-miR-452-5p|+2|+2	102	7.47727	13.6413
TTTCCGGCTCGCGTGGGTGTG	hsa-miR-29c-5p|0|-2	259.903	19.1864	13.5462
TTTCCGGCTCGCGTGGGTGT	hsa-let-7b-5p|0|+1(+2U)	63.4127	4.68182	13.5445
TTTCCGGCTCGCGTGGGTG	hsa-miR-3127-5p|0|0(+1U)	40.5246	3	13.5082
GAAAAAGTCATGGAGGCCA	hsa-miR-423-5p|0|-1	75.619	5.68966	13.2906
GAAAAAGTCATGGAGGCCATG	hsa-miR-23b-3p|0|-4(+1U)	423.952	31.9355	13.2753
GAAAAAGTCATGGAGGCCATGG	hsa-miR-181d-5p|0|-2	36.9792	2.79412	13.2346
GAAAAAGTCATGGAGGCCATGGG	hsa-miR-1307-3p|+1|0	109.42	8.31373	13.1614
TCACCAGCCCTGTGTTCCCTAGT	hsa-let-7f-5p|0|-3(+3U)	106.175	8.08333	13.135
ATGGATTTTTGGAGCAGG	hsa-miR-629-5p|0|-2	91.4921	6.96552	13.135
AATGGATTTTTGGAGCAG	hsa-miR-181a-5p|0|+2(+1U)	80.5806	6.14035	13.1231
ACCCGTCCCGTTCGTCCCCGG	hsa-miR-629-3p|0|-1(+1U)	246.016	18.8649	13.041
ACGCCCTTCCCCCCCTTCTTC	hsa-miR-767-3p|0|-1	350.194	26.9206	13.0084
ACAGGTGAGGTTCTTGGGAGC	hsa-miR-10a-5p|+1|-1(+2U)	2267.05	174.587	12.9852
ACAGGTGAGGTTCTTGGGAG	hsa-miR-423-3p|-1|0(+1U)	118.825	9.20339	12.911
CCCTGAGACCCTTTAACCTGTGA	hsa-let-7c-5p|0|-2	348.449	27.2063	12.8076
CCCTGAGACCCTTTAACCTGTG	hsa-miR-101-3p|0|+2	515.333	41.0806	12.5444
CCCTGAGACCCTTTAACCTGT	hsa-miR-425-5p|0|-1	80.9365	6.53333	12.3882
TCCCTGAGACCCTTTAACCTGTG	hsa-miR-26a-5p|0|-3(+1U)	217.984	17.6452	12.3538
TCCCTGAGACCCTTTAACCTGTGT	hsa-miR-19b-3p|0|-1(+1U)	207.063	16.7667	12.3497
TCCCTGAGACCCTTTAACCTGT	hsa-miR-25-3p|0|0(+2U)	608.476	49.2742	12.3488
TCCCTGAGACCCTTTAACCTGTT	hsa-miR-29c-3p|0|-1	1136.32	92.6129	12.2695
TCCCTGAGACCCTTTAACCTG	hsa-miR-221-3p|+1|-3	311.508	25.4828	12.2243
TCCCTGAGACCCTTTAACCT	hsa-let-7c-5p|0|+1(+1U)	332.312	27.2063	12.2145
TCCCTGAGACCCTTTAACC	hsa-miR-532-5p|+1|0	75.0169	6.15094	12.196
ACGGGTTAGGCTCTTGGGAGC	hsa-miR-767-5p|0|-2	327.413	26.9206	12.1621
ACGGGTTAGGCTCTTGGGAG	hsa-miR-181a-2-3p|0|+1	148.984	12.2667	12.1454
ACGGGTTAGGCTCTTGGGAGT	hsa-miR-187-3p|0|-2	845.258	69.8226	12.1058
ACAAGTCAGGCTCTTGGGACC	hsa-miR-28-3p|0|-1(+2U)	314.587	26.1522	12.0291
ACAAGTCAGGCTCTTGGGACCT	hsa-miR-199a-3p|+1|0(+1U)	68.6984	5.75556	11.936
ACAAGTCAGGCTCTTGGGACCTT	hsa-miR-15b-5p|+3|-1	111.081	9.45455	11.7489
ACAAGTCAGGCTCTTGGGACCTTT	hsa-miR-101-3p|0|+3	480.984	41.0806	11.7083
ACAAGTCAGGCTCTTGGGAC	hsa-miR-1301-3p|+1|-2	545.921	46.8065	11.6634
ACAAGTCAGGCTCTTGGGACT	hsa-let-7e-5p|+1|0	252.667	21.7143	11.636
ACAAGTCAGGCTCTTGGGA	hsa-miR-22-3p|0|-4(+1U)	171.143	14.7458	11.6062
ATCACAAGTCAGGCTCTTGGGAC	hsa-miR-30e-3p|+1|0(+1U)	54.8571	4.73333	11.5895
ATCACAAGTCAGGCTCTTGGGA	hsa-miR-29c-5p|0|-1	221.443	19.1864	11.5416
CCCTGAGACCCTAACTTGTGA	hsa-miR-29a-3p|-1|0	211.952	18.4407	11.4937
CCCTGAGACCCTAACTTGTG	hsa-miR-133a-3p|0|+1	109.371	9.68	11.2987
TCCCTGAGACCCTAACTTGTGAG	hsa-miR-7-1-3p|0|-1(+1U)	813.016	72.127	11.272
TCCCTGAGACCCTAACTTGTGAT	hsa-miR-148a-3p|+1|-1	282.635	25.2381	11.1987
TCCCTGAGACCCTAACTTGTG	hsa-miR-1301-3p|+3|+1(+1U)	522.698	46.8065	11.1672
TCCCTGAGACCCTAACTTGTGT	hsa-miR-24-3p|+1|-1	208.129	18.6923	11.1345
TCCCTGAGACCCTAACTTGT	hsa-miR-29a-3p|+1|-1	202.556	18.4407	10.9842
TCCCTGAGACCCTAACTTG	hsa-miR-23b-3p|+1|+1	348.286	31.9355	10.9059
TCCCTGAGACCCTAACTT	hsa-miR-514a-3p|-1|-1	41.3684	3.83333	10.7918
CGTACCGTGAGTAATAATGCG	hsa-miR-6724-5p|0|-2	62.746	5.83636	10.7509
CGTACCGTGAGTAATAATGCGT	hsa-miR-125b-1-3p|0|-2(+1U)	124.476	11.5873	10.7425
CGTACCGTGAGTAATAATGC	hsa-miR-22-3p|+1|0	158.143	14.7458	10.7246
CGTACCGTGAGTAATAATG	hsa-miR-30e-3p|0|-4	50.5238	4.73333	10.674
TCGTACCGTGAGTAATAATGCGT	hsa-miR-339-5p|0|-3	212.311	19.9344	10.6505
TCGTACCGTGAGTAATAATGC	hsa-miR-100-5p|0|0(+2U)	488.508	45.8689	10.6501
TCGTACCGTGAGTAATAATGCT	hsa-miR-223-3p|0|0(+2U)	99.1613	9.33333	10.6244
TCGTACCGTGAGTAATAATG	hsa-miR-30e-3p|+1|0	49.9508	4.73333	10.553
CTCGTACCGTGAGTAATAATGCG	hsa-miR-1299|0|-2	153.413	14.6333	10.4838
CTCGTACCGTGAGTAATAATGC	hsa-miR-625-3p|0|-4	11035	1053.11	10.4786
CATTATTACTTTTGGTACGCGC	hsa-let-7a-5p|-1|-3	63.8644	6.12903	10.42
CATTATTACTTTTGGTACGCGT	hsa-miR-29a-3p|-1|-1	191.889	18.4407	10.4057
CATTATTACTTTTGGTACGC	hsa-let-7f-5p|+3|0	84	8.08333	10.3918
CATTATTACTTTTGGTACG	hsa-miR-937-3p|0|-1	63.7541	6.14286	10.3786
CCTCAGGGCTGTAGAACAGGGCTT	hsa-miR-155-5p|0|-4	61.3333	5.92	10.3604
CCTCAGGGCTGTAGAACAGGGC	hsa-miR-500a-5p|0|-1(+1U)	94.0645	9.1	10.3368
CCTCAGGGCTGTAGAACAGGG	hsa-miR-197-3p|0|-2	448.587	43.4426	10.326
TGGACTGAGCCGTGCTACTGG	hsa-miR-455-3p|0|+2	41.6275	4.04545	10.2899
CTGGACTGAGCCGTGCTACTGGC	hsa-miR-182-5p|0|-4	906.136	88.5161	10.237
CTGGACTGAGCCGTGCTACTGGT	hsa-miR-20a-5p|0|-2	106.698	10.5	10.1618
CTGGACTGAGCCGTGCTACTGGTT	hsa-miR-126-3p|+1|-2	58.8413	5.80328	10.1393
CTGGACTGAGCCGTGCTACTG	hsa-miR-151a-3p|-2|-3	67.3607	6.66038	10.1136
CTGGACTGAGCCGTGCTACTGT	hsa-let-7b-5p|+1|-1	46.7258	4.68182	9.98027
CTGGACTGAGCCGTGCTACTGTT	hsa-miR-24-3p|+3|0	185.952	18.6923	9.94807
CTGGACTGAGCCGTGCTACTGTTT	hsa-miR-708-3p|0|+1	50.0952	5.07692	9.86724
CTGGACTGAGCCGTGCTACT	hsa-miR-10a-5p|0|-2	1716.89	174.587	9.83398
CTGGACTGAGCCGTGCTACTT	hsa-miR-22-3p|0|-2	143.667	14.7458	9.74291
CTGGACTGAGCCGTGCTAC	hsa-miR-148a-3p|+1|0(+1U)	243.206	25.2381	9.63648
CTGGACTGAGCCGTGCTA	hsa-miR-132-3p|0|-3	632.397	65.7581	9.61702
CTGGACTGAGCCGTGCTAT	hsa-miR-29a-3p|0|-1	177.161	18.4407	9.60709
CCTGGACTGAGCCGTGCTACTGG	hsa-let-7b-5p|+1|-2	44.9206	4.68182	9.5947
CCTGGACTGAGCCGTGCTACTG	hsa-miR-181b-5p|0|-4	214.095	22.5484	9.49492
CCTGGACTGAGCCGTGCTACT	hsa-miR-30e-3p|+1|-1(+1U)	44.9365	4.73333	9.49363
CCTGGACTGAGCCGTGCTAC	hsa-miR-10a-5p|+1|+1	1643.32	174.587	9.41258
CTGGACTGAGCCATGCTACTGGT	hsa-miR-10399-5p|-1|0	187.905	20	9.39524
CTGGACTGAGCCATGCTACTG	hsa-miR-338-3p|0|-2	83.7937	9.03125	9.27819
CTGGACTGAGCCATGCTACTGT	hsa-miR-1226-3p|0|0(+1U)	78.2857	8.44262	9.27268
CTGGACTGAGCCATGCTACT	hsa-miR-186-5p|+2|0	57.2951	6.23077	9.19551
CTGGACTGAGCCATGCTAC	hsa-miR-142-3p|+2|-1	53.3833	5.82353	9.16684
CTGGACTGAGCCATGCTA	hsa-miR-191-5p|0|-4	44.7288	4.88889	9.14908
CTTGGCACCTAGCAAGCACTC	hsa-miR-664a-3p|0|-2	151.921	16.6167	9.14267
CTTGGCACCTAGCAAGCACT	hsa-miR-185-5p|0|-2	103.885	11.386	9.12397
CTGGGAGGTCAAGGCTGCAGTG	hsa-miR-514a-3p|-2|-1	34.8947	3.83333	9.10297
CTGGGAGGTCAAGGCTGCAG	hsa-miR-181a-5p|0|-5	55.7966	6.14035	9.08688
CGGATCCGTCTGAGCTTGGCTGT	hsa-miR-28-5p|0|-1	27.9661	3.08108	9.07672
CGGATCCGTCTGAGCTTGGCT	hsa-miR-574-5p|0|0(+1U)	72.6102	8	9.07627
CGGATCCGTCTGAGCTTGGC	hsa-miR-1307-3p|+1|-1	75.3966	8.31373	9.06892
TCGGATCCGTCTGAGCTTGGCTG	hsa-miR-92a-3p|0|-2(+1U)	46.7619	5.2	8.99267
TCGGATCCGTCTGAGCTTGGCTGT	hsa-miR-181c-5p|0|-1	61.3571	6.84483	8.96402
TCGGATCCGTCTGAGCTTGGCTT	hsa-miR-582-3p|-1|-3	837.855	93.7917	8.93315
TCGGATCCGTCTGAGCTTGGCTTT	hsa-miR-21-5p|0|+4(+1U)	1764.14	197.921	8.91339
TCGGATCCGTCTGAGCTTGGCTTTT	hsa-miR-514a-3p|0|-1(+1U)	33.9123	3.83333	8.84668
TCGGATCCGTCTGAGCTTGGC	hsa-miR-767-5p|-1|0	237.222	26.9206	8.81191
TCGGATCCGTCTGAGCTTGG	hsa-miR-28-5p|0|-2	27.1111	3.08108	8.79922
TCGGATCCGTCTGAGCTTGGT	hsa-miR-197-3p|0|+1	382.238	43.4426	8.79869
TCGGATCCGTCTGAGCTTGGTT	hsa-let-7g-5p|+1|0	34.9828	4	8.74569
TCGGATCCGTCTGAGCTTG	hsa-miR-199a-5p|+1|-1	66.9194	7.67742	8.71639
ATCGGATCCGTCTGAGCTTGGC	hsa-miR-142-5p|0|-2	46.9032	5.40426	8.67894
ATCGGATCCGTCTGAGCTTGG	hsa-miR-30e-3p|0|0(+1U)	40.8095	4.73333	8.62173
ATCGGATCCGTCTGAGCTTGGT	hsa-miR-342-3p|0|+1	34.5789	4.05405	8.52947
TGAAGCTCAGAGGGCTCTGA	hsa-miR-425-5p|0|+2	55.4286	6.53333	8.48397
CTGAAGCTCAGAGGGCTCTGATT	hsa-miR-509-3p|+2|+1	61.8548	7.33333	8.43475
CTGAAGCTCAGAGGGCTCTGA	hsa-miR-145-3p|+2|+1	34.0833	4.04255	8.43114
CTGAAGCTCAGAGGGCTCTG	hsa-miR-582-5p|0|-2	79.569	9.44118	8.42787
TGCTGAAGCTCAGAGGGCTCTGA	hsa-miR-191-5p|0|-5	41.0656	4.88889	8.39978
CGGGGCCGTAGCACTGTCTGAG	hsa-miR-222-3p|+1|0	102.968	12.2727	8.39001
CGGGGCCGTAGCACTGTCTGA	hsa-miR-28-5p|0|-3	25.8305	3.08108	8.38359
CGGGGCCGTAGCACTGTCTG	hsa-miR-423-3p|0|-4	76.8413	9.20339	8.34924
TCACAGTGAACCGGTCTCTTTC	hsa-miR-10b-5p|+4|-1	310.016	37.381	8.29342
TCACAGTGAACCGGTCTCTTTT	hsa-miR-505-3p|+1|0	87.129	10.5849	8.23144
TCACAGTGAACCGGTCTCTTTCT	hsa-miR-29a-3p|-1|+1	151.302	18.4407	8.20477
TCACAGTGAACCGGTCTCTTTTT	hsa-miR-181a-5p|+4|0	50	6.14035	8.14286
TCACAGTGAACCGGTCTCTT	hsa-let-7a-5p|-1|-2	49.4426	6.12903	8.06695
TCACAGTGAACCGGTCTCT	hsa-miR-15b-3p|0|0(+1U)	183.413	22.7903	8.04783
TCACAGTGAACCGGTCTC	hsa-miR-509-3p|0|+1(+1U)	58.4194	7.33333	7.96628
TCTGGGCAACAAAGTGAGACC	hsa-miR-1269a|0|-1(+2U)	93.0159	11.7273	7.93159
CTCTAGCCACAGATGCAGTGA	hsa-let-7b-5p|0|+1	37.0161	4.68182	7.90636
CTTTTTGCGGTCTGGGCTTG	hsa-miR-29a-3p|0|-4(+3U)	144.841	18.4407	7.85444
CTTTTTGCGGTCTGGGCTTGT	hsa-miR-151a-3p|-1|0	52.1452	6.66038	7.82916
TTAGGGCCCTGGCTCCATCTCCT	hsa-miR-27a-3p|0|+1	530.54	67.9524	7.80752
TTCTGGAATTCTGTGTGAGGGAT	hsa-miR-143-3p|0|-3(+3U)	1896.41	243.127	7.80009
TTCTGGAATTCTGTGTGAGGG	hsa-miR-149-5p|0|0(+1U)	266.143	34.3226	7.75416
TTCTGGAATTCTGTGTGAGGGT	hsa-miR-203a-3p|+1|0(+2U)	82.746	10.678	7.74923
TTCTGGAATTCTGTGTGAGG	hsa-miR-155-5p|0|+2	45.746	5.92	7.72737
TTCTGGAATTCTGTGTGAGGT	hsa-miR-501-5p|0|-1	262.333	33.9516	7.72668
TTCTGGAATTCTGTGTGAG	hsa-miR-30e-3p|0|-2(+2U)	36.4127	4.73333	7.69282
TGCAGCTGCCTGGGAGTGACTTCA	hsa-miR-125b-2-3p|+2|+2	2008	264.238	7.59921
TGCAGCTGCCTGGGAGTGACTTC	hsa-miR-99a-5p|+1|-1	27.9032	3.70588	7.52944
TGCAGCTGCCTGGGAGTGACT	hsa-miR-148a-3p|+1|+1	188.607	25.2381	7.47309
TGCAGCTGCCTGGGAGTGAC	hsa-miR-375-3p|-1|0	56.6508	7.6	7.45405
CAGCTGCCTGGGAGTGACTTCA	hsa-miR-654-3p|0|-1	43.24	5.82353	7.42505
CAGCTGCCTGGGAGTGACTTCAT	hsa-miR-320a-3p|+4|+1	382.597	51.541	7.42316
TTGCAGCTGCCTGGGAGTGACTTCA	hsa-miR-181a-2-3p|0|-3(+2U)	90.6032	12.2667	7.38613
TTGCAGCTGCCTGGGAGTGACTTCT	hsa-miR-22-3p|0|+2	108.746	14.7458	7.37473
TTGCAGCTGCCTGGGAGTGACTT	hsa-miR-203a-3p|+1|-2	77.9524	10.678	7.3003
TTGCAGCTGCCTGGGAGTGACTTT	hsa-miR-197-3p|0|-2(+1U)	316.476	43.4426	7.28492
TTGCAGCTGCCTGGGAGTGACT	hsa-miR-942-5p|0|-1	98.0635	13.5238	7.25117
TTGCAGCTGCCTGGGAGTGAC	hsa-miR-191-5p|0|-1(+2U)	35.3333	4.88889	7.22727
TTGCAGCTGCCTGGGAGTGA	hsa-miR-223-3p|0|-1	67.2222	9.33333	7.20238
TTGCAGCTGCCTGGGAGTGAT	hsa-miR-100-5p|0|-3	329.444	45.8689	7.18231
TTGCAGCTGCCTGGGAGTG	hsa-miR-151a-3p|-2|-1(+1U)	47.2097	6.66038	7.08814
TTGCAGCTGCCTGGGAGTGT	hsa-let-7b-5p|+3|-1	33.0492	4.68182	7.05905
CCACCTCCCCTGCAAACGTCCAT	hsa-miR-514a-3p|-3|0	26.9636	3.83333	7.03399
CCACCTCCCCTGCAAACGTCC	hsa-miR-200c-3p|0|-5	80.9524	11.5323	7.01965
CCACCTCCCCTGCAAACGTC	hsa-miR-140-3p|+1|+1	144.429	20.5968	7.01219
CCACCTCCCCTGCAAACGT	hsa-miR-455-3p|-2|-2	28.3167	4.04545	6.99963
CTCGGCGTGGCGTCGGTCGTGG	hsa-miR-150-5p|0|-1	212.679	30.4355	6.98785
CTCGGCGTGGCGTCGGTCGTGGT	hsa-miR-509-3p|0|+2	51.1746	7.33333	6.97835
CTCGGCGTGGCGTCGGTCGTGGTT	hsa-let-7a-5p|+4|0	42.371	6.12903	6.91316
CTCGGCGTGGCGTCGGTCGTGGTTT	hsa-miR-142-3p|+1|-1	40.2034	5.82353	6.90361
CTCGGCGTGGCGTCGGTCGTGGTA	hsa-miR-203a-3p|-1|+1	73.6613	10.678	6.89844
CTCGGCGTGGCGTCGGTCGTGGTAT	hsa-let-7c-5p|-1|-1	187.029	27.2063	6.87445
CTCGGCGTGGCGTCGGTCGTG	hsa-miR-25-3p|0|0(+1U)	332.635	49.2742	6.75069
CTCGGCGTGGCGTCGGTCGTGT	hsa-let-7e-5p|0|0(+1U)	146.397	21.7143	6.74196
CTCGGCGTGGCGTCGGTCGTGTT	hsa-let-7b-5p|0|-4(+1U)	31.2581	4.68182	6.67648
CTCGGCGTGGCGTCGGTCGT	hsa-miR-532-5p|0|+1(+1U)	40.9821	6.15094	6.66274
CTCGGCGTGGCGTCGGTCG	hsa-miR-140-3p|+4|+4	136.921	20.5968	6.64767
TCGGCGTGGCGTCGGTCGTGG	hsa-miR-342-5p|+1|+1	37.2742	5.63043	6.62013
TCGGCGTGGCGTCGGTCGTGGT	hsa-miR-493-3p|0|0(+1U)	42.1452	6.37736	6.60856
ACTCGGCGTGGCGTCGGTCGTGG	hsa-miR-203a-3p|0|+1	70.381	10.678	6.59123
ACTCGGCGTGGCGTCGGTCGTGGT	hsa-miR-193a-5p|0|-1	305.349	46.5161	6.56437
ACTCGGCGTGGCGTCGGTCGTGGTT	hsa-miR-99b-5p|-1|-1	137.381	21.1207	6.50457
ACTCGGCGTGGCGTCGGTCGTGGTA	hsa-miR-320b|0|-3	128.492	19.7593	6.50288
ACTCGGCGTGGCGTCGGTCGTGGTAT	hsa-miR-514a-5p|0|-2	1530.6	235.746	6.49257
ACTCGGCGTGGCGTCGGTCGTGT	hsa-miR-1269a|-1|-3	76.127	11.7273	6.49145
ACTCGGCGTGGCGTCGGTCGT	hsa-miR-342-3p|0|-1	26.2097	4.05405	6.46505
ACTCGGCGTGGCGTCGGTCGTT	hsa-miR-10b-5p|0|-4	240.794	37.381	6.44161
ACTCGGCGTGGCGTCGGTCG	hsa-miR-342-5p|0|+1	35.8387	5.63043	6.36518
ACTCGGCGTGGCGTCGGT	hsa-miR-320a-3p|0|0(+2U)	327.746	51.541	6.35894
CAGTGCAATGTTAAAAGGGCATT	hsa-miR-185-5p|0|+1	72.3103	11.386	6.35083
CAGTGCAATGTTAAAAGGGCA	hsa-miR-30d-5p|0|-2(+1U)	250.476	39.5429	6.3343
CAGTGCAATGTTAAAAGGGC	hsa-miR-4423-5p|+1|0	74.4516	11.7937	6.31286
CAGTGCAATGTTAAAAGGG	hsa-miR-30c-5p|0|+1(+1U)	111.27	17.7018	6.28581
CAGTGCAATGTTAAAAGG	hsa-miR-340-5p|0|-1	51.9016	8.32	6.23818
GCAGTGCAATGTTAAAAGGGCAT	hsa-miR-342-3p|0|0(+1U)	25.2167	4.05405	6.22011
CAGTGCAATGATGAAAGGGCATT	hsa-miR-505-3p|+2|+2	65.7869	10.5849	6.21516
CAGTGCAATGATGAAAGGGCA	hsa-miR-199a-5p|0|-4	47.6034	7.67742	6.20045
CAGTGCAATGATGAAAGGGC	hsa-miR-1269a|0|0(+1U)	72.6667	11.7273	6.19638
CAGTGCAATGATGAAAGGG	hsa-miR-487b-3p|0|-1	51.7302	8.35714	6.18993
ACTCTTTCCCTGTTGCACTACT	hsa-miR-24-3p|-1|-1	115.048	18.6923	6.15481
ACTCTTTCCCTGTTGCACTA	hsa-miR-181a-5p|0|+1	37.7419	6.14035	6.14654
ACTCTTTCCCTGTTGCACT	hsa-let-7g-5p|0|-4	24.5614	4	6.14035
AACAGTCTACAGCCATGGTCG	hsa-miR-532-5p|0|-2	36.8772	6.15094	5.99537
AACAGTCTACAGCCATGGTCGT	hsa-let-7i-3p|0|-2(+2U)	31.3256	5.25	5.96678
AACAGTCTACAGCCATGGTC	hsa-miR-30d-5p|0|-4	235.921	39.5429	5.9662
ACAGTCTACAGCCATGGTCGT	hsa-miR-425-5p|+1|-1	38.7097	6.53333	5.92495
ACAGTCTACAGCCATGGTCGTT	hsa-miR-28-5p|+1|-1	18.25	3.08108	5.92325
TAACAGTCTACAGCCATGGTCGT	hsa-miR-140-3p|+1|-2	121.254	20.5968	5.88704
TAACAGTCTACAGCCATGGTCGTT	hsa-miR-1269a|0|0(+2U)	69.0317	11.7273	5.88643
TAACAGTCTACAGCCATGGTC	hsa-miR-218-5p|0|+2	59.0476	10.082	5.85676
TAACAGTCTACAGCCATGGTCT	hsa-let-7e-5p|0|0(+2U)	126.603	21.7143	5.83041
TAACAGTCTACAGCCATGGT	hsa-let-7b-5p|+1|+1	27.2857	4.68182	5.82802
TAACAGTCTACAGCCATGG	hsa-miR-28-3p|0|-2(+1U)	152.413	26.1522	5.82792
TAACAGTCTACAGCCATG	hsa-miR-10a-5p|0|-1(+2U)	1010.21	174.587	5.78625
TTGGTCCCCTTCAACCAGCTGT	hsa-miR-514a-3p|-2|-3	22.0513	3.83333	5.75251
TTTGGTCCCCTTCAACCAGCTGT	hsa-miR-99b-3p|0|-3	63.3968	11.0345	5.74534
CTCCTGGGGCCCGCACTCTCG	hsa-miR-454-3p|0|+1	25.82	4.5	5.73778
TGTGACTGGTTGACCAGAGGGGT	hsa-miR-22-3p|+2|0	84.5484	14.7458	5.73374
TGTGACTGGTTGACCAGAGGGGTT	hsa-miR-4454|+2|0	39.1746	6.85106	5.71803
TGTGACTGGTTGACCAGAGGG	hsa-let-7g-5p|-1|-2	22.7213	4	5.68033
TGTGACTGGTTGACCAGAGGGT	hsa-miR-151a-3p|0|-1(+1U)	37.6508	6.66038	5.65295
TGTGACTGGTTGACCAGAGGGTT	hsa-miR-30e-5p|+1|+2	89.9206	15.9111	5.65144
TGTGACTGGTTGACCAGAGG	hsa-miR-181a-5p|+1|+1	34.6885	6.14035	5.64927
TGTGACTGGTTGACCAGAGGT	hsa-miR-223-3p|+1|-1	52.5968	9.33333	5.63537
TGTGACTGGTTGACCAGAG	hsa-miR-15b-5p|0|-3	53.0484	9.45455	5.61089
TGTGACTGGTTGACCAGAGT	hsa-miR-378a-5p|+1|+1	30.1129	5.37037	5.60723
TATGGCTTTTCATTCCTATGTG	hsa-miR-1269b|0|-3	45.2063	8.07407	5.59895
TATGGCTTTTCATTCCTATGTGT	hsa-miR-514a-3p|-3|-4	21.38	3.83333	5.57739
TATGGCTTTTCATTCCTATGT	hsa-miR-3127-5p|0|-1(+1U)	16.6429	3	5.54762
ACTCCATTTGTTTTGATGATGG	hsa-miR-4661-5p|0|-1	86.3279	15.5714	5.54399
ACTCCATTTGTTTTGATGATG	hsa-miR-328-3p|0|0(+2U)	56.4194	10.2115	5.52506
AGCTGGTGTTGTGAATCAGGCCGA	hsa-miR-191-5p|+3|0	26.9355	4.88889	5.50953
AGCTGGTGTTGTGAATCAGGCCGT	hsa-miR-27b-3p|-1|-1(+1U)	46.1613	8.38889	5.50267
AGCTGGTGTTGTGAATCAGGCCGTT	hsa-miR-1269a|+1|0	64.1311	11.7273	5.46855
AGCTGGTGTTGTGAATCAGGCC	hsa-miR-152-3p|0|+1(+2U)	27.7458	5.11905	5.4201
AGCTGGTGTTGTGAATCAGGC	hsa-miR-181b-5p|0|+1	120.426	22.5484	5.34079
AGCTGGTGTTGTGAATCAGG	hsa-miR-191-3p|+1|0	26.5238	4.97727	5.32898
TGGAGACGCGGCCCTGTTGGAG	hsa-miR-181a-2-3p|-1|0	65.2857	12.2667	5.3222
TGGAGACGCGGCCCTGTTGGA	hsa-miR-25-3p|0|+1	262.129	49.2742	5.3198
TGGAGACGCGGCCCTGTTGG	hsa-miR-15b-5p|0|-1	50.0806	9.45455	5.29699
TCTACAGTGCACGTGTCTCCAG	hsa-miR-181b-5p|+1|+1	119.426	22.5484	5.29644
TCTACAGTGCACGTGTCTCCA	hsa-miR-6892-5p|0|0(+1U)	42.8571	8.09259	5.29585
TCTACAGTGCACGTGTCTCC	hsa-miR-24-3p|0|+1	98.9839	18.6923	5.29543
ACCACAGGGTAGAACCACGGA	hsa-miR-675-3p|0|+2	70.2581	13.2727	5.29342
ACCACAGGGTAGAACCACGGAT	hsa-miR-21-5p|0|+2(+1U)	1047.44	197.921	5.29224
ACCACAGGGTAGAACCACGGATT	hsa-miR-92a-3p|-1|0	27.4333	5.2	5.27564
ACCACAGGGTAGAACCACGGAC	hsa-miR-514a-3p|-2|-2	20.2105	3.83333	5.27231
ACCACAGGGTAGAACCACGGACT	hsa-miR-629-5p|+4|+5	36.6129	6.96552	5.25631
ACCACAGGGTAGAACCACGGACTT	hsa-miR-26b-3p|0|+1(+1U)	45.1935	8.61818	5.24398
ACCACAGGGTAGAACCACGGACTTT	hsa-miR-146b-5p|-1|-1	1313.94	251.476	5.22489
ACCACAGGGTAGAACCACGGACA	hsa-miR-199a-3p|0|-1	30.0357	5.75556	5.21856
ACCACAGGGTAGAACCACGGACAT	hsa-miR-105-5p|0|-2	191.81	36.8226	5.20902
ACCACAGGGTAGAACCACGGACATT	hsa-miR-151a-3p|0|+1	34.661	6.66038	5.20406
ACCACAGGGTAGAACCACGGACAG	hsa-miR-181b-5p|-1|-2	117.133	22.5484	5.19475
ACCACAGGGTAGAACCACGGACAGT	hsa-miR-574-5p|0|-3	41.4545	8	5.18182
ACCACAGGGTAGAACCACGG	hsa-miR-199a-5p|0|-3	39	7.67742	5.07983
ACCACAGGGTAGAACCACGGT	hsa-miR-181b-5p|+2|0	113.875	22.5484	5.05025
ACCACAGGGTAGAACCACG	hsa-miR-140-3p|0|-1(+1U)	103.429	20.5968	5.02159
ACCACAGGGTAGAACCAC	hsa-miR-363-3p|+2|0	67.2063	13.4182	5.0086
CCACAGGGTAGAACCACGGA	hsa-miR-874-3p|0|-1(+1U)	243.016	48.5873	5.00163
CCACAGGGTAGAACCACGGAT	hsa-miR-22-3p|0|-3	73.3651	14.7458	4.97533
CCACAGGGTAGAACCACGGAC	hsa-let-7g-5p|-1|0	19.8909	4	4.97273
CCACAGGGTAGAACCACGGACT	hsa-miR-155-5p|+1|-2	29.2258	5.92	4.93679
CCACAGGGTAGAACCACGGACA	hsa-miR-92a-3p|+1|+1	25.5172	5.2	4.90716
CCACAGGGTAGAACCACGGACAT	hsa-miR-339-5p|0|-2	97.6667	19.9344	4.8994
CCACAGGGTAGAACCACGG	hsa-let-7e-5p|0|+1	106.127	21.7143	4.88743
CCACAGGGTAGAACCACG	hsa-miR-23a-3p|0|0(+2U)	3841.14	792.508	4.84682
CACAGGGTAGAACCACGGA	hsa-miR-186-5p|0|-3	30.1724	6.23077	4.84249
CACAGGGTAGAACCACGGAC	hsa-miR-1285-3p|0|-1	40.2258	8.31579	4.83728
CACAGGGTAGAACCACGGACT	hsa-miR-342-3p|+2|+1	19.5593	4.05405	4.82463
CACAGGGTAGAACCACGGACA	hsa-miR-708-3p|+1|0	24.4634	5.07692	4.81855
ACAGGGTAGAACCACGGAC	hsa-miR-509-3p|0|-2(+2U)	35.1613	7.33333	4.79472
ACAGGGTAGAACCACGGACA	hsa-miR-1299|0|-1	70.129	14.6333	4.79242
ACAGGGTAGAACCACGGACAG	hsa-miR-93-3p|0|+1	21.0794	4.40385	4.78658
ACAGGGTAGAACCACGGACAGG	hsa-miR-181b-5p|-1|-3	106.86	22.5484	4.73914
CAGGGTAGAACCACGGAC	hsa-miR-338-3p|0|-1(+1U)	42.7143	9.03125	4.72961
CAGGGTAGAACCACGGACA	hsa-let-7b-5p|0|-2	22.0169	4.68182	4.70265
TACCACAGGGTAGAACCACGGA	hsa-miR-7706|0|-1(+1U)	135.159	28.9355	4.67104
TACCACAGGGTAGAACCACGGAT	hsa-miR-223-3p|+1|0	43.377	9.33333	4.64754
TACCACAGGGTAGAACCACGGATT	hsa-miR-582-5p|0|-4	43.8621	9.44118	4.64583
TACCACAGGGTAGAACCACGGAC	hsa-miR-187-3p|0|+1(+1U)	324.226	69.8226	4.64357
TACCACAGGGTAGAACCACGGACT	hsa-miR-514a-3p|-3|-1(+1U)	17.8	3.83333	4.64348
TACCACAGGGTAGAACCACGGACTT	hsa-miR-146b-3p|-1|0(+1U)	5026.67	1085.71	4.62982
TACCACAGGGTAGAACCACGGACA	hsa-let-7g-5p|0|-1	18.4828	4	4.62069
TACCACAGGGTAGAACCACGGACAT	hsa-miR-30b-5p|0|+1	18.3559	3.97727	4.61521
TACCACAGGGTAGAACCACGGACAG	hsa-miR-30e-3p|0|-2(+3U)	21.8065	4.73333	4.607
TACCACAGGGTAGAACCACGGT	hsa-miR-103a-3p|0|0(+1U)	28.1379	6.18182	4.55172
TACCACAGGGTAGAACCACG	hsa-miR-197-3p|0|-3	197.683	43.4426	4.55043
TACCACAGGGTAGAACCACGT	hsa-miR-508-3p|0|-1(+2U)	175.19	38.5238	4.54759
TACCACAGGGTAGAACCAC	hsa-miR-151a-3p|-2|0	30.2623	6.66038	4.54363
CAGTGGTTTTACCCTATGGTAGG	hsa-miR-338-3p|0|-1	40.9508	9.03125	4.53435
CAGTGGTTTTACCCTATGGTAGT	hsa-miR-140-3p|+2|+2(+1U)	92.4762	20.5968	4.48984
CAGTGGTTTTACCCTATGGTA	hsa-miR-155-5p|0|-5	26.5082	5.92	4.47774
CAGTGGTTTTACCCTATGGT	hsa-miR-615-3p|0|-3	15.6	3.5	4.45714
TAACACTGTCTGGTAAAGATGGC	hsa-miR-93-3p|0|-1	19.6167	4.40385	4.45444
TAACACTGTCTGGTAAAGATG	hsa-miR-509-3p|+4|+1	32.6508	7.33333	4.45238
CATCTTCCAGTACAGTGTTGG	hsa-miR-20b-3p|0|-2	41.9524	9.44444	4.44202
GTAGTGTTTCCTACTTTATGGAT	hsa-miR-19a-3p|0|-1	108.932	24.7818	4.39565
GTAGTGTTTCCTACTTTATGGATT	hsa-miR-199a-3p|-1|0(+1U)	25.2857	5.75556	4.39327
GTAGTGTTTCCTACTTTATGGA	hsa-miR-363-3p|0|+1	58.6774	13.4182	4.37298
GTAGTGTTTCCTACTTTATGG	hsa-miR-519c-5p|0|-1	285.203	65.4762	4.35583
GTAGTGTTTCCTACTTTATGGT	hsa-miR-508-5p|0|-2	21.2903	4.94643	4.30418
GTAGTGTTTCCTACTTTATG	hsa-miR-509-3p|0|-1(+1U)	31.4839	7.33333	4.29326
GTAGTGTTTCCTACTTTATGT	hsa-miR-181b-5p|0|-2(+2U)	96.7381	22.5484	4.29024
GTAGTGTTTCCTACTTTAT	hsa-miR-93-3p|+1|+1	18.8033	4.40385	4.26974
TAGTGTTTCCTACTTTATGGA	hsa-miR-92a-3p|0|+1(+1U)	22.1724	5.2	4.26393
TAGTGTTTCCTACTTTATGG	hsa-miR-30e-5p|0|+2(+1U)	67.6825	15.9111	4.25379
AGTGTTTCCTACTTTATGGATG	hsa-miR-182-5p|0|+1(+1U)	375.883	88.5161	4.2465
AGTGTTTCCTACTTTATGG	hsa-miR-125a-5p|+1|-2	36.377	8.56897	4.24521
TGTAGTGTTTCCTACTTTATGG	hsa-miR-15a-5p|0|-2	530.73	125.683	4.22278
TGTAGTGTTTCCTACTTTATGGT	hsa-miR-7-1-3p|0|-2	301.349	72.127	4.17804
TGTAGTGTTTCCTACTTTATG	hsa-miR-129-5p|0|-1	53.0909	12.7391	4.16755
TGTAGTGTTTCCTACTTT	hsa-miR-484|0|0(+2U)	26.92	6.48276	4.15255
CATAAAGTAGAAAGCACTAC	hsa-let-7e-5p|0|-3(+3U)	89.6667	21.7143	4.12939
CATAAAGTAGAAAGCACTA	hsa-miR-30c-5p|0|-1(+1U)	72.5397	17.7018	4.09788
CATAAAGTAGAAAGCACT	hsa-let-7b-5p|0|-1	19.1525	4.68182	4.09083
CCATAAAGTAGAAAGCACT	hsa-miR-181b-5p|+1|-2	91.8197	22.5484	4.07212
CCCATAAAGTAGAAAGCACTAC	hsa-miR-15b-5p|0|-2(+1U)	38.4754	9.45455	4.06951
CCCATAAAGTAGAAAGCACTA	hsa-miR-507|0|-1	17.6721	4.35088	4.06174
CCCATAAAGTAGAAAGCACTAT	hsa-miR-629-5p|-1|0	28.2	6.96552	4.04851
CCCATAAAGTAGAAAGCACT	hsa-miR-146b-3p|-1|-3	4394.32	1085.71	4.0474
CCCATAAAGTAGAAAGCAC	hsa-miR-378a-5p|0|-3	21.2419	5.37037	3.95539
CCCATAAAGTAGAAAGCA	hsa-miR-26a-5p|0|-2(+1U)	69.6984	17.6452	3.95
GAGATGAAGCACTGTAGCTC	hsa-miR-150-5p|+1|-2	118.982	30.4355	3.90932
GAGATGAAGCACTGTAGCTCT	hsa-miR-500a-3p|+1|0(+1U)	468.333	120.302	3.89299
GAGATGAAGCACTGTAGCT	hsa-miR-181a-2-3p|-1|-2	47.7097	12.2667	3.88938
AGATGAAGCACTGTAGCTCT	hsa-let-7g-5p|+3|0	15.4727	4	3.86818
AGATGAAGCACTGTAGCT	hsa-let-7a-5p|-1|0	23.4746	6.12903	3.83006
GATGAAGCACTGTAGCTCA	hsa-miR-199a-3p|+1|-1(+1U)	21.931	5.75556	3.81041
GATGAAGCACTGTAGCTC	hsa-miR-222-3p|0|+3	46.6613	12.2727	3.80203
GATGAAGCACTGTAGCTCT	hsa-miR-103a-3p|+4|-1	23.4603	6.18182	3.79505
GATGAAGCACTGTAGCTCTT	hsa-miR-152-3p|+1|+1	19.4098	5.11905	3.79169
GATGAAGCACTGTAGCTCTTT	hsa-let-7f-5p|+1|-1	30.5172	8.08333	3.77533
ATGAAGCACTGTAGCTCA	hsa-miR-181a-2-3p|0|-3	46.2459	12.2667	3.77005
TGAGATGAAGCACTGTAGCTCA	hsa-miR-486-5p|0|-2	35.7903	9.51786	3.76033
TGAGATGAAGCACTGTAGCTCAT	hsa-miR-328-3p|0|-2	38.2097	10.2115	3.74181
TGAGATGAAGCACTGTAGCTCATT	hsa-miR-1307-3p|+2|+1	31	8.31373	3.72877
TGAGATGAAGCACTGTAGCTCAG	hsa-miR-155-5p|+1|0	22.0645	5.92	3.72711
TGAGATGAAGCACTGTAGCTCT	hsa-miR-130a-3p|-1|0	69.5397	18.678	3.72309
TGAGATGAAGCACTGTAGCTCTT	hsa-miR-425-3p|0|-2	39.9683	10.7619	3.71386
TGAGATGAAGCACTGTAGCTCTTT	hsa-miR-92b-3p|0|-4	14.3036	3.85417	3.7112
TGAGATGAAGCACTGTAGCTCTTTT	hsa-miR-92a-3p|+1|+1(+1U)	19.2951	5.2	3.71059
TGAGATGAAGCACTGTAGCT	hsa-miR-126-3p|-1|0	21.5246	5.80328	3.70904
TGAGATGAAGCACTGTAGCTT	hsa-miR-3180|0|+3	15.9032	4.29032	3.70677
TGAGATGAAGCACTGTAGCTTT	hsa-miR-509-3p|+2|0	27.1129	7.33333	3.69721
TGAGATGAAGCACTGTAGCTTTT	hsa-miR-660-5p|0|-1	25.3279	6.87755	3.68269
TGAGATGAAGCACTGTAGC	hsa-miR-151a-3p|-1|-2	24.3548	6.66038	3.65668
TGAGATGAAGCACTGTAG	hsa-miR-758-3p|0|-1	51.7627	14.2414	3.63467
TGAGATGAAGCACTGTAGT	hsa-miR-99b-5p|0|0(+1U)	76.6129	21.1207	3.62739
TGAGATGAAGCACTGTAGTT	hsa-miR-148b-3p|0|-1	116.857	32.2951	3.61842
TGAGATGAAGCACTGTAGTTT	hsa-miR-99b-5p|0|-4	75.9355	21.1207	3.59531
CTGAGATGAAGCACTGTAGCTCA	hsa-miR-196a-5p|0|-1(+1U)	37.7869	10.566	3.57626
CTGAGATGAAGCACTGTAGCTC	hsa-miR-502-3p|0|+1	105.238	29.5	3.56739
CTGAGATGAAGCACTGTAGCTCT	hsa-miR-181a-2-3p|0|-2	43.7581	12.2667	3.56723
CTGAGATGAAGCACTGTAGCTCTT	hsa-miR-27b-3p|0|-2(+2U)	29.9032	8.38889	3.56462
CTGAGATGAAGCACTGTAGCT	hsa-miR-582-3p|+2|+1	334.097	93.7917	3.56212
CTGAGATGAAGCACTGTAGCTT	hsa-miR-151a-3p|-1|-3	23.6981	6.66038	3.55807
CTGAGATGAAGCACTGTAGC	hsa-miR-203a-3p|+1|-1(+1U)	37.9677	10.678	3.55571
CTGAGATGAAGCACTGTAG	hsa-miR-146b-5p|+4|+1	894.095	251.476	3.55539
TCTGAGATGAAGCACTGTAGC	hsa-miR-181a-5p|-1|-1	21.7627	6.14035	3.54421
TCTGAGATGAAGCACTGTAG	hsa-miR-29b-2-5p|-1|+1	15.7778	4.46154	3.5364
GATATCATCATATACTGTAAG	hsa-miR-146b-5p|0|+3	889.127	251.476	3.53563
GGATATCATCATATACTGTAAGT	hsa-miR-514b-5p|0|-2	21.0364	5.95652	3.53165
ATTCCTGGAAATACTGTTCTT	hsa-miR-101-3p|0|-2	144.143	41.0806	3.50878
ATTCCTGGAAATACTGTTCT	hsa-miR-551b-3p|0|0(+1U)	13.4545	3.86538	3.48078
TCCAGTTTTCCCAGGAATCCCT	hsa-miR-92b-3p|0|-2	13.4043	3.85417	3.47786
GTTTTCCCAGGAATCCCT	hsa-miR-29c-5p|+2|+3	66.4915	19.1864	3.46555
GTCCAGTTTTCCCAGGAATCCCTT	hsa-miR-142-5p|0|-3	18.7258	5.40426	3.46501
GTCCAGTTTTCCCAGGAATCCCTTT	hsa-miR-508-3p|+2|-1(+1U)	132.887	38.5238	3.44948
GTCCAGTTTTCCCAGGAATCCC	hsa-miR-127-3p|0|-3	28.0164	8.125	3.44817
GTCCAGTTTTCCCAGGAATCC	hsa-miR-423-5p|0|-3	19.5968	5.68966	3.44428
GTCCAGTTTTCCCAGGAATCCT	hsa-miR-363-3p|+1|+1	46.1587	13.4182	3.44001
GTCCAGTTTTCCCAGGAATC	hsa-miR-140-3p|+1|0(+1U)	70.6508	20.5968	3.43019
GTCCAGTTTTCCCAGGAATCT	hsa-miR-937-3p|-3|-5(+2U)	20.871	6.14286	3.3976
GTCCAGTTTTCCCAGGAAT	hsa-miR-20b-3p|0|-1	31.6	9.44444	3.34588
GTCCAGTTTTCCCAGGAA	hsa-miR-484|0|-2(+3U)	21.6809	6.48276	3.34439
GAGAACTGAATTCCATGGGTTG	hsa-miR-193a-5p|0|-2(+1U)	155.476	46.5161	3.34241
GAGAACTGAATTCCATGGGTTGT	hsa-miR-142-3p|0|-1(+1U)	19.3607	5.82353	3.32456
GAGAACTGAATTCCATGGGTT	hsa-miR-199a-5p|0|-1	25.4909	7.67742	3.32024
GAGAACTGAATTCCATGGGTTT	hsa-miR-181a-5p|0|-4	20.3871	6.14035	3.32018
GAGAACTGAATTCCATGGGT	hsa-miR-451a|0|+1	27.8525	8.41176	3.31113
AGAACTGAATTCCATGGGTTG	hsa-miR-514a-3p|0|-3	12.6604	3.83333	3.30271
AGAACTGAATTCCATGGGTTGT	hsa-miR-181b-5p|0|-3	74.4211	22.5484	3.3005
AGAACTGAATTCCATGGGTTGTG	hsa-miR-25-3p|+1|0	162.143	49.2742	3.29062
AGAACTGAATTCCATGGGTTGTGT	hsa-miR-148a-5p|0|-3	17.3387	5.29091	3.27708
AGAACTGAATTCCATGGGTT	hsa-miR-382-5p|+1|0	14.8167	4.52273	3.27605
GAACTGAATTCCATGGGTT	hsa-miR-509-3p|+3|+1	23.9667	7.33333	3.26818
GAACTGAATTCCATGGGT	hsa-miR-103a-3p|+1|0	20.0323	6.18182	3.24051
TGAGAACTGAATTCCATGGGTTG	hsa-miR-6892-5p|0|0(+2U)	26.0952	8.09259	3.22458
TGAGAACTGAATTCCATGGGTTGT	hsa-let-7f-5p|+5|+5	26.0484	8.08333	3.22248
TGAGAACTGAATTCCATGGGTTT	hsa-miR-767-5p|0|-3	86.3226	26.9206	3.20656
TGAGAACTGAATTCCATGGGTTTT	hsa-miR-30c-5p|0|-5	56.6825	17.7018	3.20209
TGAGAACTGAATTCCATGGGT	hsa-miR-409-3p|0|-3	34.873	10.8929	3.20146
TGAGAACTGAATTCCATGGG	hsa-miR-99b-5p|+3|0	67.6032	21.1207	3.2008
TGAGAACTGAATTCCATGG	hsa-miR-30e-3p|0|-2(+1U)	15.15	4.73333	3.2007
TGAGAACTGAATTCCATGGTTT	hsa-miR-423-5p|0|-2	18.1803	5.68966	3.19533
TGAGAACTGAATTCCATG	hsa-miR-424-5p|0|0(+1U)	71.746	22.5091	3.18742
TTGAGAACTGAATTCCATGGGTT	hsa-let-7b-5p|0|-3(+1U)	14.9138	4.68182	3.18547
TTGAGAACTGAATTCCATGGGTTT	hsa-miR-140-3p|0|+4	65.0317	20.5968	3.15738
TTGAGAACTGAATTCCATGGGT	hsa-miR-148a-3p|+3|-1	79.6393	25.2381	3.15552
TTGAGAACTGAATTCCATGGG	hsa-miR-495-3p|0|+1	19.5	6.18868	3.15091
TTGAGAACTGAATTCCATGG	hsa-miR-151a-3p|0|-1(+2U)	20.9836	6.66038	3.15051
CCCTGTGGACTCAGTTCTGGT	hsa-miR-423-3p|-1|-3	28.9825	9.20339	3.14911
CCCTGTGGACTCAGTTCTGGTT	hsa-miR-24-3p|0|-1(+1U)	58.6393	18.6923	3.13708
CCCTGTGGACTCAGTTCTGG	hsa-miR-30e-3p|+2|0	14.8	4.73333	3.12676
GCCCTGTGGACTCAGTTCTGGTT	hsa-miR-423-3p|-1|-2	28.7742	9.20339	3.12648
GCCCTGTGGACTCAGTTCTGG	hsa-let-7a-5p|0|-3	19.1333	6.12903	3.12175
GCCCTGTGGACTCAGTTCTG	hsa-miR-28-5p|0|-2(+1U)	9.61667	3.08108	3.1212
GCCCTGTGGACTCAGTTCT	hsa-let-7f-5p|0|+1	25.0159	8.08333	3.09475
TGCCCTGTGGACTCAGTTCTGGT	hsa-miR-9-3p|+1|+1	31.7937	10.2759	3.09401
TGCCCTGTGGACTCAGTTCTGGTT	hsa-miR-148a-3p|-1|0	78	25.2381	3.09057
TGCCCTGTGGACTCAGTTCTGG	hsa-miR-514a-3p|+1|0	11.8	3.83333	3.07826
TGCCCTGTGGACTCAGTTCTG	hsa-miR-199a-3p|0|-1(+2U)	17.6964	5.75556	3.07467
TGCCCTGTGGACTCAGTTCT	hsa-miR-320a-3p|0|+2(+1U)	158.397	51.541	3.07322
GAACTGAATTCCATAGGCTGT	hsa-miR-345-5p|0|-3	26.7667	8.83333	3.03019
AACTGAATTCCATAGGCTGT	hsa-miR-30e-3p|-1|0	14.3387	4.73333	3.0293
ACTGAATTCCATAGGCTGT	hsa-miR-126-3p|+1|-1	17.5574	5.80328	3.02542
TGAGAACTGAATTCCATAGGCTGT	hsa-miR-140-3p|+5|+2	62.0476	20.5968	3.01249
TGAGAACTGAATTCCATAGGCTGTT	hsa-miR-181a-5p|+1|-3	18.38	6.14035	2.99331
TGAGAACTGAATTCCATAGGCTGTG	hsa-miR-10a-5p|+1|-1	520.841	174.587	2.98327
TGAGAACTGAATTCCATAGGCTGTGA	hsa-miR-423-5p|0|+1	16.9516	5.68966	2.97937
TGAGAACTGAATTCCATAGGCT	hsa-miR-10b-5p|0|-1(+2U)	111.317	37.381	2.97792
TGAGAACTGAATTCCATAGGCTT	hsa-miR-125b-2-3p|+2|+2(+1U)	786.54	264.238	2.97663
TGAGAACTGAATTCCATAGGCTTT	hsa-miR-4772-3p|0|-1	16.8958	5.67925	2.97501
TGAGAACTGAATTCCATAGGC	hsa-miR-103a-3p|+2|+1	18.3448	6.18182	2.96755
TGAGAACTGAATTCCATAGG	hsa-miR-542-3p|0|-1(+1U)	9981.35	3373.4	2.95884
TGAGAACTGAATTCCATAG	hsa-miR-500a-3p|+1|+1	355.857	120.302	2.95804
CTGAGAACTGAATTCCATAGGCT	hsa-miR-19b-3p|0|-3	49.5645	16.7667	2.95613
CAGTGCACTACAGAACTTTGTC	hsa-miR-27b-5p|0|+1	37.6508	12.7627	2.95006
CAGTGCACTACAGAACTTTGTCT	hsa-miR-30e-3p|0|-3(+1U)	13.9333	4.73333	2.94366
CAGTGCACTACAGAACTTTGT	hsa-miR-181b-2-3p|0|+2	46.8095	15.9245	2.93946
CAGTGCACTACAGAACTTTGTT	hsa-miR-199a-3p|0|-2	16.8333	5.75556	2.92471
CAGTGCACTACAGAACTTTG	hsa-miR-150-5p|0|-2	88.0784	30.4355	2.89394
CAGTGCACTACAGAACTTT	hsa-miR-532-5p|0|-3	17.7636	6.15094	2.88795
CAGTGCACTACAGAACTTTTT	hsa-miR-181a-5p|+2|-1	17.6667	6.14035	2.87714
GTGCACTACAGAACTTTGT	hsa-miR-29b-2-5p|0|+1	12.8167	4.46154	2.8727
GTGCACTACAGAACTTTG	hsa-miR-151a-3p|+1|+1	19.0323	6.66038	2.85753
TGCACTACAGAACTTTGT	hsa-miR-125b-5p|0|-4	24.875	8.70909	2.85621
TCAGTGCACTACAGAACTTTGTC	hsa-let-7b-5p|+4|0	13.3448	4.68182	2.85035
TCAGTGCACTACAGAACTTTGTCT	hsa-miR-103a-3p|+2|+2	17.551	6.18182	2.83914
TCAGTGCACTACAGAACTTTGTCTT	hsa-miR-455-5p|+2|+2	13.8	4.87273	2.83209
TCAGTGCACTACAGAACTTTGTT	hsa-miR-24-3p|0|-3(+1U)	52.7302	18.6923	2.82095
TCAGTGCACTACAGAACTTTGTTT	hsa-miR-542-3p|0|+1	9476.11	3373.4	2.80907
TCAGTGCACTACAGAACTTTGTTTT	hsa-miR-223-3p|+1|+1(+1U)	25.931	9.33333	2.77833
TCAGTGCACTACAGAACTTTG	hsa-miR-338-3p|0|-3	25.0588	9.03125	2.77468
TCAGTGCACTACAGAACTTT	hsa-miR-484|0|0(+1U)	17.9608	6.48276	2.77055
TCAGTGCACTACAGAACTTTT	hsa-miR-379-5p|0|-3	55.6825	20.1111	2.76875
TCAGTGCACTACAGAACTTTTT	hsa-miR-132-3p|+2|0(+1U)	181.81	65.7581	2.76482
TCAGTGCACTACAGAACTT	hsa-miR-320b|0|-4	54.5079	19.7593	2.7586
TCAGTGCACTACAGAACT	hsa-miR-193a-5p|0|-1(+1U)	128.097	46.5161	2.75381
GTCAGTGCACTACAGAACTTTGT	hsa-miR-223-3p|-1|0	25.5932	9.33333	2.74213
GTCAGTGCACTACAGAACTTTG	hsa-miR-514a-3p|-3|-1	10.5098	3.83333	2.74169
AAAGTTCTGAGACACTCCGAC	hsa-miR-320a-3p|+4|0	141.302	51.541	2.74154
AAAGTTCTGAGACACTCCGA	hsa-miR-30a-3p|+1|+1(+1U)	212.161	77.5397	2.73616
AAAGTTCTGAGACACTCCG	hsa-miR-484|0|+1(+1U)	17.66	6.48276	2.72415
CAAAGTTCTGAGACACTCCGACT	hsa-miR-155-5p|0|-3(+1U)	16.1148	5.92	2.72209
CAAAGTTCTGAGACACTCCGAC	hsa-miR-186-5p|0|-1	16.9	6.23077	2.71235
CAAAGTTCTGAGACACTCCGA	hsa-miR-140-3p|+2|+1(+1U)	55.8413	20.5968	2.71117
TCAGTGCATCACAGAACTTTGTT	hsa-miR-146b-5p|0|+1	674	251.476	2.68017
TCAGTGCATCACAGAACTTTGTTT	hsa-miR-181b-5p|+2|-2	60.2222	22.5484	2.6708
TCAGTGCATCACAGAACTTTG	hsa-miR-452-5p|0|+1	19.907	7.47727	2.66233
TCAGTGCATCACAGAACTTT	hsa-miR-181b-5p|+1|0	59.6842	22.5484	2.64694
GAAGTTCTGTTATACACTCAGGC	hsa-miR-331-3p|0|-2	111.746	42.2203	2.64673
TCTGGCTCCGTGTCTTCACTCCCT	hsa-miR-99b-5p|0|-2	55.6129	21.1207	2.6331
TCTGGCTCCGTGTCTTCACTCC	hsa-miR-125b-5p|0|-2	22.9091	8.70909	2.63048
TCTGGCTCCGTGTCTTCACTC	hsa-miR-26a-5p|0|-3	46.0678	17.6452	2.61079
TCTGGCTCCGTGTCTTCACT	hsa-miR-10a-5p|+1|-3(+1U)	455.54	174.587	2.60924
CTCCCAACCCTTGTACCAGTG	hsa-miR-20a-5p|+2|0	27.3878	10.5	2.60836
CTCCCAACCCTTGTACCAGT	hsa-miR-181a-5p|0|-4(+1U)	15.9661	6.14035	2.60019
CTCCCAACCCTTGTACCAG	hsa-miR-409-3p|-1|-2	28.0164	10.8929	2.572
TCTCCCAACCCTTGTACCAGTGC	hsa-miR-15b-5p|+2|0	24.1803	9.45455	2.55753
TCTCCCAACCCTTGTACCAGTGT	hsa-miR-30e-5p|0|+1	40.4839	15.9111	2.54438
TCTCCCAACCCTTGTACCAGT	hsa-miR-191-5p|0|-2	12.3898	4.88889	2.53428
TCTCCCAACCCTTGTACCAGTT	hsa-miR-10a-5p|-1|-3	442.016	174.587	2.53178
TCTCCCAACCCTTGTACCAG	hsa-miR-27a-3p|0|-1	171.762	67.9524	2.52768
TCTCCCAACCCTTGTACCA	hsa-miR-92a-3p|0|+1(+2U)	13.0816	5.2	2.5157
TCTCCCAACCCTTGTACC	hsa-miR-34a-5p|0|+1	19.0635	7.58696	2.51267
TGTCTCCCAACCCTTGTACCAGTG	hsa-miR-142-3p|+3|-1	14.5763	5.82353	2.503
TGTCTCCCAACCCTTGTACCAGT	hsa-let-7d-3p|+1|-2	124.9	50.1129	2.49237
TGTCTCCCAACCCTTGTACCAG	hsa-miR-142-3p|+1|0	14.5	5.82353	2.4899
TGTCTCCCAACCCTTGTACCA	hsa-miR-127-3p|0|-2	20.2157	8.125	2.48808
TGTCTCCCAACCCTTGTACC	hsa-miR-199a-3p|0|-4	14.2807	5.75556	2.4812
TAGACTGAAGCTCCTTGAGGA	hsa-let-7g-3p|0|0(+1U)	10.2909	4.15385	2.47744
TAGACTGAAGCTCCTTGAGGAT	hsa-miR-455-3p|0|-1(+2U)	9.91071	4.04545	2.44984
TAGACTGAAGCTCCTTGAGG	hsa-miR-142-3p|0|-5	14.2364	5.82353	2.44463
TAGACTGAAGCTCCTTGAGGT	hsa-miR-103a-3p|+2|0	15.1081	6.18182	2.44396
TAGACTGAAGCTCCTTGAG	hsa-miR-196a-5p|0|0(+1U)	25.7541	10.566	2.43744
TAGACTGAAGCTCCTTGA	hsa-miR-425-5p|+3|+2	15.918	6.53333	2.43643
GACTGAAGCTCCTTGAGGA	hsa-miR-1307-3p|+1|0(+1U)	20.25	8.31373	2.43573
GACTGAAGCTCCTTGAGG	hsa-miR-103a-3p|0|+2	15.0351	6.18182	2.43215
CTAGACTGAAGCTCCTTGAGGA	hsa-miR-6511b-3p|+2|+1	9.48214	3.90323	2.42931
CTAGACTGAAGCTCCTTGAGGAT	hsa-miR-508-5p|0|-1(+1U)	11.9836	4.94643	2.42268
CTAGACTGAAGCTCCTTGAGGATT	hsa-miR-455-3p|-1|0	9.76744	4.04545	2.41442
CTAGACTGAAGCTCCTTGAGGAC	hsa-miR-200b-3p|0|+1	12.4407	5.15385	2.41386
CTAGACTGAAGCTCCTTGAGGACT	hsa-miR-423-3p|+1|0	22.1639	9.20339	2.40824
CTAGACTGAAGCTCCTTGAGGT	hsa-miR-92a-3p|0|-2(+2U)	12.4918	5.2	2.40227
CTAGACTGAAGCTCCTTGAGGTT	hsa-miR-146a-5p|+2|+4	2849.83	1187.75	2.39936
CTAGACTGAAGCTCCTTGAGGTTT	hsa-miR-424-5p|0|-3	53.8095	22.5091	2.39057
CTAGACTGAAGCTCCTTGAG	hsa-miR-197-3p|0|-1	103.492	43.4426	2.38227
CTAGACTGAAGCTCCTTGAGT	hsa-miR-574-5p|0|+1	19.0364	8	2.37955
CTAGACTGAAGCTCCTTGAGTT	hsa-miR-126-3p|0|-1(+1U)	13.7966	5.80328	2.37738
CTAGACTGAAGCTCCTTGA	hsa-miR-181a-2-3p|+1|-2	29.0328	12.2667	2.3668
CTAGACTGAAGCTCCTTGAT	hsa-miR-130b-5p|0|+1	1723.57	729.032	2.36419
CTAGACTGAAGCTCCTTGATT	hsa-miR-23b-3p|+1|0	75.0794	31.9355	2.35097
CTAGACTGAAGCTCCTTG	hsa-miR-181b-3p|0|0(+1U)	18.0167	7.66667	2.35
CTAGACTGAAGCTCCTTGT	hsa-miR-187-3p|0|-4	163.733	69.8226	2.34499
ACTAGACTGAAGCTCCTTGAGGA	hsa-miR-375-3p|0|-1	17.8	7.6	2.34211
ACTAGACTGAAGCTCCTTGAGG	hsa-miR-502-3p|+1|+1	69.0635	29.5	2.34114
ACTAGACTGAAGCTCCTTGAGGT	hsa-miR-92a-3p|+1|-2	12.1167	5.2	2.33013
ACTAGACTGAAGCTCCTTGAG	hsa-miR-149-5p|0|-1	79.9048	34.3226	2.32805
ACTAGACTGAAGCTCCTTGAGT	hsa-miR-500a-5p|0|+2	21.129	9.1	2.32187
ACTAGACTGAAGCTCCTTGA	hsa-miR-30d-5p|0|-4(+1U)	91.3492	39.5429	2.31013
ACTAGACTGAAGCTCCTTG	hsa-miR-101-3p|-1|-1(+1U)	94.8413	41.0806	2.30866
TACTAGACTGAAGCTCCTTGAGGA	hsa-miR-130a-3p|0|+1	43.1148	18.678	2.30832
TACTAGACTGAAGCTCCTTGAGG	hsa-miR-92a-3p|+1|+1	11.9259	5.2	2.29345
TACTAGACTGAAGCTCCTTGAGGT	hsa-miR-514a-3p|+1|-1	8.78125	3.83333	2.29076
TACTAGACTGAAGCTCCTTGAG	hsa-miR-143-3p|+1|0(+1U)	556.667	243.127	2.28961
TACTAGACTGAAGCTCCTTGAGT	hsa-miR-500a-3p|0|+1	274.286	120.302	2.27998
TACTAGACTGAAGCTCCTTGA	hsa-miR-874-3p|0|-2	110.778	48.5873	2.27997
TACTAGACTGAAGCTCCTTGAT	hsa-miR-320a-3p|+2|-1	117.433	51.541	2.27845
TACTAGACTGAAGCTCCTTG	hsa-miR-151a-3p|-2|-2	15.1724	6.66038	2.27801
TACTAGACTGAAGCTCCTTGT	hsa-miR-99a-5p|0|-3	8.42623	3.70588	2.27374
CAGTGCATGACAGAACTTGGG	hsa-let-7b-5p|0|-3(+2U)	10.6441	4.68182	2.27349
CAGTGCATGACAGAACTTGG	hsa-miR-125b-5p|+1|0	19.7619	8.70909	2.26911
TCAGTGCATGACAGAACTTGGG	hsa-miR-127-3p|+1|0	18.4355	8.125	2.26898
TCAGTGCATGACAGAACTTGGGT	hsa-miR-181a-5p|0|-3	13.8596	6.14035	2.25714
TCAGTGCATGACAGAACTTGGGTT	hsa-miR-615-3p|0|0(+1U)	7.88889	3.5	2.25397
TCAGTGCATGACAGAACTTGGT	hsa-miR-219a-2-3p|0|-1	143.222	63.6667	2.24956
TCAGTGCATGACAGAACTTGGTT	hsa-miR-493-3p|0|-1	14.322	6.37736	2.24576
TCAGTGCATGACAGAACTTG	hsa-miR-423-3p|0|-2	20.6667	9.20339	2.24555
TCAGTGCATGACAGAACTTGT	hsa-miR-509-3p|+2|0(+1U)	16.459	7.33333	2.24441
GTCAGTGCATGACAGAACTTGG	hsa-miR-125a-5p|0|-2	19.0488	8.56897	2.223
TAATGCTAATCGTGATAGGGGTTT	hsa-miR-199a-3p|-1|-2	12.75	5.75556	2.21525
TAATGCTAATCGTGATAGGGGTT	hsa-miR-708-3p|0|-1	11.2456	5.07692	2.21505
TAATGCTAATCGTGATAGGGGT	hsa-miR-519c-5p|0|-3	144.952	65.4762	2.21381
TAATGCTAATCGTGATAGGGG	hsa-miR-105-5p|0|-1	81.2742	36.8226	2.20718
TAATGCTAATCGTGATAGGG	hsa-miR-509-3p|+2|-2	16.1833	7.33333	2.20682
TGCTAATCGTGATAGGGGTT	hsa-miR-484|0|+1	14.2857	6.48276	2.20365
TTAATGCTAATCGTGATAGGGGTTT	hsa-miR-28-3p|+1|0	57.6129	26.1522	2.20299
TTAATGCTAATCGTGATAGGGGTTTT	hsa-miR-188-5p|0|+1(+1U)	13.3922	6.08696	2.20014
TTAATGCTAATCGTGATAGGGGT	hsa-miR-126-3p|0|-1	12.7627	5.80328	2.19922
TTAATGCTAATCGTGATAGGGG	hsa-miR-181b-3p|0|-2	16.86	7.66667	2.19913
TTAATGCTAATCGTGATAGGG	hsa-let-7i-3p|0|-3(+1U)	11.5385	5.25	2.1978
TTAATGCTAATCGTGATAGGGT	hsa-miR-127-3p|0|0(+2U)	17.8333	8.125	2.19487
TTAATGCTAATCGTGATAGGGTT	hsa-miR-204-5p|0|+1(+1U)	249.095	113.524	2.19421
TTAATGCTAATCGTGATAGG	hsa-miR-451a|0|-4	18.4259	8.41176	2.19049
TTAATGCTAATCGTGATAGGT	hsa-miR-152-3p|0|+1	11.2105	5.11905	2.18996
TTAATGCTAATCGTGATAG	hsa-miR-455-3p|-2|0	8.81818	4.04545	2.17978
TAGCAGCACATAATGGTTTGTGG	hsa-miR-142-3p|0|-2	12.6842	5.82353	2.1781
TAGCAGCACATAATGGTTTGTGGA	hsa-miR-6509-5p|0|+1	8.51852	3.91304	2.17695
TAGCAGCACATAATGGTTTGTGT	hsa-miR-103a-3p|+3|-1	13.4262	6.18182	2.17189
TAGCAGCACATAATGGTTTGT	hsa-miR-183-5p|+2|+1	2452.02	1129.52	2.17084
TAGCAGCACATAATGGTTTG	hsa-miR-1296-5p|0|+1	29.75	13.7414	2.16499
CGAATCATTATTTGCTGCTCTAT	hsa-miR-186-5p|+1|+1	13.4615	6.23077	2.16049
CGAATCATTATTTGCTGCTCT	hsa-miR-30e-5p|+1|+2(+1U)	34.3667	15.9111	2.15992
CGAATCATTATTTGCTGCTCTT	hsa-miR-146a-5p|+2|0	2565.35	1187.75	2.15985
CGAATCATTATTTGCTGCTC	hsa-let-7a-5p|0|-2	13.1587	6.12903	2.14695
CGAATCATTATTTGCTGCT	hsa-miR-30a-3p|0|-3(+1U)	166.3	77.5397	2.14471
GCAGCACATCATGGTTTACA	hsa-miR-92a-3p|0|-4	11.1356	5.2	2.14146
CAGCACATCATGGTTTACA	hsa-miR-212-3p|0|+1	434	203.177	2.13606
CAGCACATCATGGTTTAC	hsa-miR-425-5p|0|-1(+1U)	13.9483	6.53333	2.13494
TAGCAGCACATCATGGTTTACAT	hsa-miR-34a-5p|0|-2	16.1833	7.58696	2.13305
TAGCAGCACATCATGGTTTAC	hsa-miR-92b-3p|0|-4(+1U)	8.20455	3.85417	2.12875
TAGCAGCACATCATGGTTTACT	hsa-miR-887-3p|0|+1	234.403	110.857	2.11446
TAGCAGCACATCATGGTTTA	hsa-miR-103a-3p|-1|-1	13.0702	6.18182	2.11429
TAGCAGCACATCATGGTTTAT	hsa-miR-187-3p|0|0(+1U)	146.881	69.8226	2.10364
TAGCAGCACATCATGGTTT	hsa-miR-320a-3p|0|-1(+1U)	108.016	51.541	2.09573
TAGCAGCACATCATGGTT	hsa-miR-125b-5p|0|+1	18.2105	8.70909	2.09098
ACCAATATTACTGTGCTGCTTT	hsa-let-7a-5p|0|-3(+3U)	12.7321	6.12903	2.07735
ACCAATATTACTGTGCTGCTT	hsa-miR-92a-3p|0|+2	10.7377	5.2	2.06494
ACCAATATTACTGTGCTGCT	hsa-miR-92a-3p|0|-2	10.7347	5.2	2.06436
GCAGCACGTAAATATTGGCG	hsa-miR-28-5p|0|+1	6.34694	3.08108	2.05997
CAGCACGTAAATATTGGCG	hsa-miR-92a-3p|0|+1	10.6897	5.2	2.0557
GCACGTAAATATTGGCGT	hsa-miR-424-5p|0|-2	46.2222	22.5091	2.05349
TAGCAGCACGTAAATATTGGCGT	hsa-miR-204-5p|0|-3	232.841	113.524	2.05103
TAGCAGCACGTAAATATTGGCGTAG	hsa-miR-1307-3p|0|+2(+1U)	16.9649	8.31373	2.04059
TAGCAGCACGTAAATATTGGC	hsa-miR-363-3p|+1|-1	27.339	13.4182	2.03746
TAGCAGCACGTAAATATTGGCT	hsa-miR-708-3p|+1|-2	10.3333	5.07692	2.03535
TAGCAGCACGTAAATATTGG	hsa-miR-501-5p|0|+1	68.9524	33.9516	2.0309
TAGCAGCACGTAAATATTG	hsa-miR-155-5p|+4|0	12.0161	5.92	2.02975
CTGCAGTGAAGGCACTTGTAGC	hsa-miR-26a-5p|0|-4	35.7797	17.6452	2.02773
CTGCAGTGAAGGCACTTGTAG	hsa-miR-1287-3p|0|-1	62.0635	30.623	2.0267
ACTGCAGTGAAGGCACTTGTAGC	hsa-miR-425-3p|-1|-3	21.7581	10.7619	2.02177
ACTGCAGTGAAGGCACTTGTAGT	hsa-miR-550a-3p|0|-1	21.0545	10.4286	2.01893
ACTGCAGTGAAGGCACTTGTAT	hsa-miR-10399-5p|0|-1	40.3226	20	2.01613
ACTGCAGTGAAGGCACTTGT	hsa-miR-25-3p|+1|0(+1U)	99.1111	49.2742	2.01142
TACTGCAGTGAAGGCACTTGTAG	hsa-miR-508-5p|0|+1	9.91228	4.94643	2.00393
AAAGTGCTTACAGTGCAGGTAG	hsa-miR-23a-3p|0|+2	1587.3	792.508	2.00288
AAGTGCTTACAGTGCAGGTAG	hsa-miR-125a-5p|0|-1(+1U)	17.1351	8.56897	1.99967
AGTGCTTACAGTGCAGGTAG	hsa-miR-125b-2-3p|+2|+2(+2U)	528.365	264.238	1.99958
CAAAGTGCTTACAGTGCAGGTAGT	hsa-miR-500a-5p|0|-1	18.1667	9.1	1.99634
CAAAGTGCTTACAGTGCAGGTA	hsa-miR-199a-3p|-1|-3	11.4808	5.75556	1.99473
CAAAGTGCTTACAGTGCAGGTAT	hsa-miR-92b-3p|0|0(+2U)	7.66	3.85417	1.98746
CAAAGTGCTTACAGTGCAGGT	hsa-miR-542-5p|0|-1	105.397	53.1475	1.98309
CAAAGTGCTTACAGTGCAGG	hsa-miR-508-3p|0|-1(+1U)	76.3226	38.5238	1.98118
CAAAGTGCTTACAGTGCAG	hsa-miR-181a-5p|+1|-2	12.1622	6.14035	1.98069
TCAAAGTGCTTACAGTGCAGGTAG	hsa-miR-16-5p|0|-3	3548.05	1794.38	1.97731
TCAAAGTGCTTACAGTGCAGGTA	hsa-miR-342-3p|0|+2	8	4.05405	1.97333
TCAAAGTGCTTACAGTGCAGGT	hsa-miR-148a-3p|+1|-2	49.746	25.2381	1.97107
TCAAAGTGCTTACAGTGCAGG	hsa-let-7a-3p|0|+1	21.3387	10.8367	1.96911
CCACTGACCGTTGACTGTACC	hsa-miR-379-5p|0|+1	39.4355	20.1111	1.96088
CCACTGACCGTTGACTGTAC	hsa-miR-127-5p|+1|-1	62.6078	31.9841	1.95747
CCACTGACCGTTGACTGTA	hsa-miR-423-3p|-1|-3(+1U)	17.9831	9.20339	1.95396
ACCACTGACCGTTGACTGTACCT	hsa-miR-889-3p|0|-1	28.1935	14.5246	1.94109
ACCACTGACCGTTGACTGTAC	hsa-miR-199b-5p|0|-1	97.9365	50.4603	1.94086
ACCACTGACCGTTGACTGTACT	hsa-miR-152-3p|0|-1	9.85484	5.11905	1.92513
ACCACTGACCGTTGACTGTA	hsa-miR-24-3p|+2|0	35.9672	18.6923	1.92417
ACCACTGACCGTTGACTGTAT	hsa-miR-140-3p|+1|+4	39.5306	20.5968	1.91926
ACCACTGACCGTTGACTGTATT	hsa-let-7d-3p|0|-1	95.725	50.1129	1.91019
ACCACTGACCGTTGACTGT	hsa-miR-29a-3p|0|-4(+1U)	35.2157	18.4407	1.90967
ACCACTGACCGTTGACTGTT	hsa-miR-181b-5p|+1|+2	42.75	22.5484	1.89592
ACCACTGACCGTTGACTGTTT	hsa-miR-28-5p|+2|0	5.79592	3.08108	1.88113
ACCACTGACCGTTGACTGTTTT	hsa-miR-760|0|+1	23.0526	12.2833	1.87674
ACCACTGACCGTTGACTG	hsa-miR-425-3p|0|-1	20.1587	10.7619	1.87316
AACCACTGACCGTTGACTGTACC	hsa-miR-92a-3p|+1|+1(+1U)	9.66038	5.2	1.85776
AACCACTGACCGTTGACTGTAC	hsa-miR-29a-3p|-1|-1(+1U)	34.254	18.4407	1.85752
AACCACTGACCGTTGACTGTACT	hsa-miR-363-3p|0|-2	24.898	13.4182	1.85554
AACCACTGACCGTTGACTGTA	hsa-miR-508-3p|-1|0	71.4127	38.5238	1.85373
AACCACTGACCGTTGACTGTAT	hsa-let-7f-5p|0|-3	14.9661	8.08333	1.85148
AACCACTGACCGTTGACTGT	hsa-let-7a-5p|0|+1	11.339	6.12903	1.85004
ACATTCAACGCTGTCGGTGAGTT	hsa-miR-6842-3p|0|0(+1U)	24.5082	13.2881	1.84437
ACATTCAACGCTGTCGGTGAGT	hsa-miR-142-3p|+1|-2	10.6923	5.82353	1.83605
ACATTCAACGCTGTCGGTGAG	hsa-miR-339-5p|0|-2(+1U)	36.6	19.9344	1.83602
ACATTCAACGCTGTCGGTGA	hsa-miR-27a-3p|0|-2(+2U)	124.238	67.9524	1.82831
ACATTCAACGCTGTCGGTG	hsa-miR-181a-2-3p|0|-2(+1U)	22.2951	12.2667	1.81753
CATTCAACGCTGTCGGTGAGT	hsa-miR-30e-3p|+2|-1	8.58065	4.73333	1.81281
CATTCAACGCTGTCGGTGAG	hsa-miR-92b-3p|0|-2(+1U)	6.96154	3.85417	1.80624
CATTCAACGCTGTCGGTGA	hsa-miR-10b-5p|+1|+1(+1U)	67.4737	37.381	1.80503
TTCAACGCTGTCGGTGAGT	hsa-miR-484|0|-1	11.6944	6.48276	1.80393
TTCAACGCTGTCGGTGAG	hsa-miR-382-5p|+2|+2	8.13793	4.52273	1.79934
AACATTCAACGCTGTCGGTGAGTT	hsa-miR-146b-3p|-1|-2	1942.65	1085.71	1.78928
AACATTCAACGCTGTCGGTGAGTTT	hsa-miR-1843|0|+2(+1U)]	561.661	314.492	1.78593
AACATTCAACGCTGTCGGTGAGTTTT	hsa-miR-196b-5p|0|+2	21.5556	12.0741	1.78528
AACATTCAACGCTGTCGGTGAG	hsa-miR-30e-3p|+1|-1(+2U)	8.45	4.73333	1.78521
AACATTCAACGCTGTCGGTGA	hsa-miR-22-3p|0|-2(+1U)	26.3016	14.7458	1.78367
AACATTCAACGCTGTCGGTGAT	hsa-miR-125a-5p|0|-5	15.2742	8.56897	1.7825
AACATTCAACGCTGTCGGTGATT	hsa-miR-378a-5p|0|0(+1U)	9.57143	5.37037	1.78227
AACATTCAACGCTGTCGGTG	hsa-miR-142-3p|+1|+1(+1U)	10.3784	5.82353	1.78215
AACATTCAACGCTGTCGGTGT	hsa-miR-27b-5p|0|-1	22.7258	12.7627	1.78064
AACATTCAACGCTGTCGGT	hsa-let-7a-5p|+1|-1	10.907	6.12903	1.77956
AACATTCAACGCTGTCGGTT	hsa-let-7d-5p|+1|-1	12.4407	7	1.77724
AACATTCAACGCTGTCGG	hsa-miR-26b-3p|0|0(+1U)	15.2903	8.61818	1.77419
GAACATTCAACGCTGTCGGTGAG	hsa-miR-223-3p|0|+1(+1U)	16.4821	9.33333	1.76594
CTCACTGATCAATGAATGCAA	hsa-miR-423-5p|0|-4	10.0179	5.68966	1.76071
CTCACTGATCAATGAATGCAAA	hsa-miR-99b-5p|+4|0	37.1864	21.1207	1.76066
CTCACTGATCAATGAATGC	hsa-miR-29a-3p|+2|0	32.4483	18.4407	1.7596
CTCACTGAACAATGAATGCAAC	hsa-miR-508-5p|0|-4	8.69492	4.94643	1.75782
CTCACTGAACAATGAATGCAAT	hsa-miR-338-3p|+1|+1	15.8182	9.03125	1.75149
CTCACTGAACAATGAATGCA	hsa-miR-378a-5p|0|-1	9.40476	5.37037	1.75123
CTCACTGAACAATGAATGCAT	hsa-miR-28-3p|+1|-2	45.7419	26.1522	1.74907
CTCACTGAACAATGAATGCATT	hsa-miR-320a-3p|+1|+3	89.6032	51.541	1.73848
CTCACTGAACAATGAATGC	hsa-miR-616-5p|0|+1	15.283	8.7931	1.73807
ACATTCATTGCTGTCGGTGGGTT	hsa-let-7d-5p|+1|0	12.1552	7	1.73645
ACATTCATTGCTGTCGGTGGGTTT	hsa-let-7f-5p|0|+4	14.02	8.08333	1.73443
ACATTCATTGCTGTCGGTGGGT	hsa-miR-95-3p|0|-1	8.17647	4.71429	1.7344
ACATTCATTGCTGTCGGTGGG	hsa-miR-425-5p|+2|-1	11.3065	6.53333	1.73058
ACATTCATTGCTGTCGGTGG	hsa-miR-3180|0|+2	7.41818	4.29032	1.72905
ACATTCATTGCTGTCGGTG	hsa-miR-30d-5p|0|0(+2U)	68.1935	39.5429	1.72455
CATTCATTGCTGTCGGTGGGTT	hsa-miR-423-5p|+2|+1	9.78947	5.68966	1.72057
CATTCATTGCTGTCGGTGGGT	hsa-miR-629-5p|0|+2	11.9787	6.96552	1.71972
CATTCATTGCTGTCGGTGGG	hsa-miR-181a-5p|0|-1	10.5227	6.14035	1.7137
CATTCATTGCTGTCGGTGG	hsa-miR-150-5p|0|-1(+1U)	52.125	30.4355	1.71264
AACATTCATTGCTGTCGGTGGGTT	hsa-miR-21-5p|0|-1	338.54	197.921	1.71048
AACATTCATTGCTGTCGGTGGGTTT	hsa-miR-5683|0|-1	22.0968	12.9355	1.70823
AACATTCATTGCTGTCGGTGGGTTTT	hsa-miR-143-3p|+3|0(+1U)	413.889	243.127	1.70236
AACATTCATTGCTGTCGGTGGG	hsa-miR-34a-5p|0|+1(+2U)	12.9091	7.58696	1.70148
AACATTCATTGCTGTCGGTGG	hsa-let-7a-5p|-1|-4	10.3947	6.12903	1.69598
AACATTCATTGCTGTCGGTGGT	hsa-miR-30b-5p|0|0(+2U)	6.73585	3.97727	1.69358
AACATTCATTGCTGTCGGTGGTT	hsa-miR-10a-5p|+2|-2	294.778	174.587	1.68843
AACATTCATTGCTGTCGGTG	hsa-miR-125b-5p|0|-1	14.6818	8.70909	1.6858
AACATTCATTGCTGTCGGTGT	hsa-miR-486-5p|0|0(+1U)	16.027	9.51786	1.68389
AACATTCATTGCTGTCGGT	hsa-miR-27a-3p|0|-2	114.238	67.9524	1.68115
AACATTCATTGCTGTCGG	hsa-miR-532-5p|-1|0	10.3077	6.15094	1.67579
CAACATTCATTGCTGTCGGTGGGT	hsa-miR-320b|0|-1	33.0323	19.7593	1.67174
CAACATTCATTGCTGTCGGTGGG	hsa-let-7f-5p|0|+1	13.4921	8.08333	1.66912
CAACATTCATTGCTGTCGGTGG	hsa-miR-509-3p|0|-2(+1U)	12.2203	7.33333	1.66641
CAACATTCATTGCTGTCGGTG	hsa-miR-452-5p|+3|+1	12.4375	7.47727	1.66337
AACATTCAACCTGTCGGTGAGTT	hsa-miR-342-5p|+1|+2	9.34483	5.63043	1.6597
AACATTCAACCTGTCGGTGAG	hsa-miR-152-3p|0|0(+2U)	8.48333	5.11905	1.65721
AACATTCATTGTTGTCGGTGGGTT	hsa-miR-28-3p|-1|-1	42.9535	26.1522	1.64244
AACATTCATTGTTGTCGGTGGG	hsa-miR-30e-3p|0|-1(+3U)	7.74545	4.73333	1.63636
AACATTCATTGTTGTCGGTGG	hsa-miR-4454|+3|+2	11.193	6.85106	1.63376
TTGGCAATGGTAGAACTCACACT	hsa-miR-199a-5p|0|-5	12.5179	7.67742	1.63048
TTGGCAATGGTAGAACTCACA	hsa-miR-423-3p|0|0(+2U)	15	9.20339	1.62983
CAATGGTAGAACTCACACT	hsa-miR-340-3p|0|+1	68.7541	42.2759	1.62632
TTTGGCAATGGTAGAACTCACACTG	hsa-miR-103a-3p|0|+1(+1U)	10.0526	6.18182	1.62616
TTTGGCAATGGTAGAACTCACACTGT	hsa-miR-3074-5p|-1|0	2406.57	1480.52	1.62549
TTTGGCAATGGTAGAACTCACACTGG	hsa-miR-4668-3p|+1|0	8.47368	5.22	1.62331
TTTGGCAATGGTAGAACTCACACTGGT	hsa-miR-505-3p|+1|+1	17.1803	10.5849	1.6231
TTTGGCAATGGTAGAACTCACACTT	hsa-miR-151a-3p|0|-1	10.8033	6.66038	1.62202
TTTGGCAATGGTAGAACTCACAC	hsa-miR-146a-5p|+2|+3	1922.11	1187.75	1.61828
TTTGGCAATGGTAGAACTCACA	hsa-let-7g-5p|-1|-1	6.47059	4	1.61765
TTTGGCAATGGTAGAACTCACAT	hsa-miR-143-3p|0|-1(+3U)	392.603	243.127	1.61481
TTTGGCAATGGTAGAACTCAC	hsa-miR-143-3p|-1|0(+1U)	392.079	243.127	1.61265
TTTGGCAATGGTAGAACTCACT	hsa-miR-181a-2-3p|+1|0	19.7759	12.2667	1.61216
TTTGGCAATGGTAGAACTCA	hsa-miR-512-3p|0|0(+1U)	17.6721	10.9833	1.609
TTTGGCAATGGTAGAACTCAT	hsa-miR-181b-3p|0|-1	12.3103	7.66667	1.6057
TTTGGCAATGGTAGAACTC	hsa-miR-455-3p|0|-1	6.48276	4.04545	1.60248
ATGGCACTGGTAGAATTCACTG	hsa-miR-148a-5p|-1|-1	8.47458	5.29091	1.60172
ATGGCACTGGTAGAATTCACTGT	hsa-miR-6511b-3p|0|-1	6.25	3.90323	1.60124
ATGGCACTGGTAGAATTCACT	hsa-miR-24-3p|0|-4(+1U)	29.9167	18.6923	1.60048
ATGGCACTGGTAGAATTCAC	hsa-miR-574-5p|0|-2	12.8	8	1.6
ATGGCACTGGTAGAATTCA	hsa-miR-339-5p|0|-1	31.8571	19.9344	1.5981
ATGGCACTGGTAGAATTC	hsa-miR-181a-5p|0|-2(+1U)	9.78571	6.14035	1.59367
TGGCACTGGTAGAATTCACTG	hsa-let-7a-5p|+3|0	9.7541	6.12903	1.59146
TATGGCACTGGTAGAATTCACTG	hsa-miR-708-3p|0|-2	8.05556	5.07692	1.5867
TATGGCACTGGTAGAATTCACTGT	hsa-miR-222-3p|+1|+2	19.4355	12.2727	1.58363
TATGGCACTGGTAGAATTCACTT	hsa-miR-203a-3p|+1|0	16.9032	10.678	1.583
TATGGCACTGGTAGAATTCAC	hsa-miR-148a-5p|-1|0	8.37288	5.29091	1.5825
TATGGCACTGGTAGAATTCA	hsa-miR-30a-3p|+1|-1(+1U)	122.667	77.5397	1.58199
TATGGCACTGGTAGAATTC	hsa-miR-1301-3p|0|-2	73.9841	46.8065	1.58064
TATGGCACTGGTAGAATT	hsa-miR-30c-5p|0|+1(+2U)	27.9206	17.7018	1.57728
TGTATGGCACTGGTAGAATTCA	hsa-miR-99b-5p|+1|-1	33.05	21.1207	1.56482
TGGACGGAGAACTGATAAGGG	hsa-miR-191-3p|0|-1	7.78333	4.97727	1.56377
TGGACGGAGAACTGATAAGG	hsa-miR-182-5p|0|-3	138.196	88.5161	1.56125
TGGACGGAGAACTGATAAG	hsa-miR-378a-3p|0|-1(+2U)	620.349	398.079	1.55836
TATGGAGGTCTCTGTCTGGCT	hsa-miR-196b-5p|0|0(+2U)	18.7857	12.0741	1.55587
TATGGAGGTCTCTGTCTGGCTTT	hsa-miR-151a-3p|-2|-3(+1U)	10.3478	6.66038	1.55364
TATGGAGGTCTCTGTCTGGCTT	hsa-miR-92b-3p|0|-2(+2U)	5.98276	3.85417	1.55228
TATGGAGGTCTCTGTCTGGCTTA	hsa-miR-30c-2-3p|0|+1	114.127	73.8475	1.54544
ATATGGAGGTCTCTGTCTGGCT	hsa-miR-30e-5p|+1|+4	24.4516	15.9111	1.53676
ATATGGAGGTCTCTGTCTGGC	hsa-miR-126-3p|0|-2	8.89655	5.80328	1.53302
TATATGGAGGTCTCTGTCTGGC	hsa-miR-151a-3p|+1|0(+1U)	10.2069	6.66038	1.53248
TGGAGAGAAAGGCAGTTCCTGAT	hsa-miR-5683|0|-2	19.7667	12.9355	1.5281
TGGAGAGAAAGGCAGTTCCTG	hsa-let-7d-3p|0|-2(+1U)	76.5652	50.1129	1.52785
TGGAGAGAAAGGCAGTTCCTGT	hsa-miR-105-5p|0|+1(+1U)	56.1905	36.8226	1.52598
TGGAGAGAAAGGCAGTTCCT	hsa-miR-129-5p|0|-1(+1U)	19.3864	12.7391	1.5218
AAAGAATTCTCCTTTTGGGCTT	hsa-miR-365a-3p|0|+1	55.8548	36.7213	1.52105
AAAGAATTCTCCTTTTGGGCT	hsa-miR-509-3p|0|-1	11.1404	7.33333	1.51914
AAGAATTCTCCTTTTGGGCT	hsa-miR-151a-3p|0|-2(+1U)	10.1053	6.66038	1.51722
CAAAGAATTCTCCTTTTGGGCTT	hsa-miR-223-3p|+1|0(+1U)	14.1404	9.33333	1.51504
CAAAGAATTCTCCTTTTGGGCTTT	hsa-miR-432-5p|0|-1	8.61667	5.6875	1.51502
CAAAGAATTCTCCTTTTGGGCTTTT	hsa-miR-30e-3p|+1|-2	7.17021	4.73333	1.51483
CAAAGAATTCTCCTTTTGGGC	hsa-miR-140-3p|+1|+2(+3U)	31.1667	20.5968	1.51318
CAAAGAATTCTCCTTTTGGG	hsa-miR-509-3p|0|0(+2U)	11.0526	7.33333	1.50718
CAAAGAATTCTCCTTTTGGGT	hsa-miR-423-5p|0|-5	8.57143	5.68966	1.50649
CAAAGAATTCTCCTTTTGG	hsa-miR-767-5p|-1|-3	40.4516	26.9206	1.50262
CGTGTCTTGTGTTGCAGCCGG	hsa-miR-1301-3p|0|-1	70.3016	46.8065	1.50196
CGTGTCTTGTGTTGCAGCCGGT	hsa-miR-370-5p|0|-1	11.1129	7.4	1.50174
TCGTGTCTTGTGTTGCAGCCGGA	hsa-miR-27b-3p|-1|+1	12.5833	8.38889	1.5
TCGTGTCTTGTGTTGCAGCCGGAT	hsa-miR-363-3p|0|-1	20.1053	13.4182	1.49836
TCGTGTCTTGTGTTGCAGCCGGT	hsa-miR-381-3p|0|-1	14.4355	9.64151	1.49722
TCGTGTCTTGTGTTGCAGCCGGTT	hsa-miR-24-3p|+2|+1(+1U)	27.9839	18.6923	1.49708
TCGTGTCTTGTGTTGCAGCCG	hsa-miR-574-5p|0|+2	11.9245	8	1.49057
TCGTGTCTTGTGTTGCAGCCGT	hsa-miR-20a-5p|0|+1	15.5455	10.5	1.48052
TCGTGTCTTGTGTTGCAGCCGTT	hsa-miR-574-5p|0|-1	11.8302	8	1.47877
TCGTGTCTTGTGTTGCAGCC	hsa-miR-30e-3p|-1|-3	6.98148	4.73333	1.47496
TCGTGTCTTGTGTTGCAG	hsa-miR-191-5p|+1|-2	7.20408	4.88889	1.47356
CTCGTGTCTTGTGTTGCAGCCGG	hsa-miR-1269a|0|-2(+1U)	17.2787	11.7273	1.47338
CTCGTGTCTTGTGTTGCAGCCG	hsa-miR-24-3p|0|0(+3U)	27.5246	18.6923	1.47251
CATCCCTTGCATGGTGGAGGGT	hsa-let-7c-5p|-2|-1	40.0357	27.2063	1.47156
CATCCCTTGCATGGTGGAGGGTT	hsa-miR-132-3p|+1|0	96.6667	65.7581	1.47004
CATCCCTTGCATGGTGGAGG	hsa-miR-1307-3p|0|+1	12.2167	8.31373	1.46946
ACTGCCCTAAGTGCTCCTTCTG	hsa-miR-664a-3p|0|-3	24.3934	16.6167	1.46801
ACTGCCCTAAGTGCTCCTTCTGT	hsa-miR-18a-3p|0|-1(+1U)	27.6792	18.9	1.46451
ACTGCCCTAAGTGCTCCTTCT	hsa-miR-654-3p|-2|-2	8.52632	5.82353	1.46411
TAAGGTGCATCTAGTGCAGATA	hsa-miR-181b-5p|+1|-1	33	22.5484	1.46352
TAAGGTGCATCTAGTGCAGAT	hsa-miR-3200-3p|0|+1	8.77419	6	1.46237
CTGCGCTTGGATTTCGTCCCC	hsa-miR-455-3p|0|-1(+1U)	5.90741	4.04545	1.46026
GCTGCGCTTGGATTTCGTCCC	hsa-miR-629-3p|0|-1	27.541	18.8649	1.45991
AACGGAATCCCAAAAGCAGCTGT	hsa-miR-28-3p|0|-3	38.1452	26.1522	1.45858
AACGGAATCCCAAAAGCAGCTG	hsa-miR-30b-5p|0|0(+1U)	5.78846	3.97727	1.45538
AACGGAATCCCAAAAGCAGCT	hsa-miR-577|-1|0	44.5179	30.6053	1.45458
AACGGAATCCCAAAAGCAGC	hsa-miR-10b-5p|0|-3	54.3651	37.381	1.45435
CGGAATCCCAAAAGCAGCTG	hsa-miR-509-3p|+4|0	10.6333	7.33333	1.45
CGGAATCCCAAAAGCAGCT	hsa-miR-582-5p|0|-3	13.6667	9.44118	1.44756
CAACGGAATCCCAAAAGCAGCTGT	hsa-miR-16-2-3p|-1|-3	16.42	11.3684	1.44435
CAACGGAATCCCAAAAGCAGCT	hsa-miR-1307-3p|0|+3	11.9833	8.31373	1.44139
CAACGGAATCCCAAAAGCAGCTT	hsa-miR-125b-5p|0|+1	12.5417	8.70909	1.44007
CAACGGAATCCCAAAAGCAGCTTT	hsa-miR-103a-3p|-1|0	8.9	6.18182	1.43971
CAACGGAATCCCAAAAGCAGC	hsa-miR-182-5p|+1|-2	126.907	88.5161	1.43372
CAACGGAATCCCAAAAGCAG	hsa-miR-199a-5p|0|-2	10.96	7.67742	1.42756
CAACGGAATCCCAAAAGCA	hsa-miR-455-3p|0|-2	5.77419	4.04545	1.42733
CAACGGAATCCCAAAAGC	hsa-miR-432-5p|0|+1	8.11475	5.6875	1.42677
TGACCTATGAATTGACAGCCA	hsa-miR-508-5p|0|-1	7.05085	4.94643	1.42544
TGACCTATGAATTGACAGCCAT	hsa-miR-455-3p|0|-3	5.75862	4.04545	1.42348
TGACCTATGAATTGACAGCCAG	hsa-miR-128-3p|0|+1	22.0943	15.5323	1.42248
TGACCTATGAATTGACAGCCAGT	hsa-miR-29a-5p|0|+1	39.7258	28.0323	1.41715
TGACCTATGAATTGACAGCC	hsa-let-7g-3p|0|-1	5.66667	4	1.41667
CTGACCTATGAATTGACAGCCA	hsa-miR-103a-3p|0|+1	8.74138	6.18182	1.41405
CTGACCTATGAATTGACAGCCAT	hsa-miR-378a-3p|+2|0	561.841	398.079	1.41138
CTGACCTATGAATTGACAGCCATT	hsa-miR-126-3p|0|0(+1U)	8.16364	5.80328	1.40673
CTGACCTATGAATTGACAGCCAG	hsa-miR-125a-5p|0|-4	12.0164	8.56897	1.40232
CTGACCTATGAATTGACAGCCT	hsa-miR-423-3p|-1|-4	12.8269	9.20339	1.39372
CTGACCTATGAATTGACAGC	hsa-miR-509-3p|0|-3	10.2167	7.33333	1.39318
CTGACCTATGAATTGACAG	hsa-miR-23a-3p|+1|-1	1104.05	792.508	1.39311
CTGACCTATGAATTGACA	hsa-let-7c-5p|-1|-2	37.8929	27.2063	1.39279
AACTGGCCTACAAAGTCCCAG	hsa-miR-105-5p|+2|-1	51.2742	36.8226	1.39247
AACTGGCCTACAAAGTCCCA	hsa-miR-342-5p|+1|+4	7.83673	5.63043	1.39185
TGGGTCTTTGCGGGCGAGATGAG	hsa-miR-3127-5p|0|-2	4.17308	3	1.39103
TGGGTCTTTGCGGGCGAGATGAT	hsa-miR-223-3p|+1|+1	12.9818	9.33333	1.39091
TGGGTCTTTGCGGGCGAGATG	hsa-miR-155-5p|0|-4(+1U)	8.22414	5.92	1.38921
TGGGTCTTTGCGGGCGAGATGT	hsa-miR-423-3p|0|0(+1U)	12.7833	9.20339	1.38898
TGGGTCTTTGCGGGCGAGAT	hsa-miR-186-5p|0|+1	8.64444	6.23077	1.38738
TGGGTCTTTGCGGGCGAGATT	hsa-miR-142-3p|+1|-1(+1U)	8.0625	5.82353	1.38447
TGGGTCTTTGCGGGCGAGA	hsa-miR-574-5p|-1|0	11.0755	8	1.38443
TGGGTCTTTGCGGGCGAG	hsa-miR-140-3p|+2|+2	28.4444	20.5968	1.38101
TGGGTCTTTGCGGGCGAGT	hsa-miR-30e-3p|-1|-1	6.53333	4.73333	1.38028
ACTGGCCCTCAAAGTCCCGCT	hsa-miR-148a-5p|-1|-2	7.27419	5.29091	1.37485
CTGGCCCTCAAAGTCCCGCT	hsa-miR-30d-5p|0|-1	54.3387	39.5429	1.37417
AACTGGCCCTCAAAGTCCCGCTT	hsa-miR-335-3p|0|-1	13.7903	10.0612	1.37064
AACTGGCCCTCAAAGTCCCGC	hsa-miR-34a-5p|0|-3	10.3725	7.58696	1.36716
AACTGGCCCTCAAAGTCCCG	hsa-miR-199a-3p|0|+1	7.86667	5.75556	1.3668
CGGGGTTTTGAGGGCGAGATG	hsa-miR-146b-3p|0|-1	1482.87	1085.71	1.3658
CCAGTGGGGCTGCTGTTATCTGT	hsa-miR-99a-5p|-1|-1	5.0566	3.70588	1.36448
TGTAACAGCAACTCCATGTGGAA	hsa-miR-221-3p|0|+1	34.75	25.4828	1.36367
TGTAACAGCAACTCCATGTGG	hsa-miR-151a-3p|+1|-1	9.03704	6.66038	1.35684
CCAATATTGGCTGTGCTGCTCCA	hsa-miR-342-3p|0|-2	5.5	4.05405	1.35667
TAGCAGCACAGAAATATTGGCA	hsa-miR-10a-5p|0|-3(+1U)	236.672	174.587	1.35561
TAGCAGCACAGAAATATTGG	hsa-miR-181b-5p|0|+2	30.5625	22.5484	1.35542
TAGCAGCACAGAAATATTG	hsa-let-7a-5p|-1|-1	8.30508	6.12903	1.35504
TAGGTAGTTTCATGTTGTTGGGA	hsa-miR-532-5p|+1|-1	8.33333	6.15094	1.35481
TAGGTAGTTTCATGTTGTTGGGT	hsa-miR-151a-3p|0|-2(+2U)	9.01887	6.66038	1.35411
TAGGTAGTTTCATGTTGTTGG	hsa-miR-375-3p|0|-3	10.2909	7.6	1.35407
TAGGTAGTTTCATGTTGTTGGT	hsa-miR-204-5p|0|0(+1U)	153.46	113.524	1.35179
TAGGTAGTTTCATGTTGTTG	hsa-miR-92a-3p|0|+1(+1U)	7.01818	5.2	1.34965
TAGGTAGTTTCCTGTTGTTGGGA	hsa-miR-23b-3p|+2|0(+1U)	42.9344	31.9355	1.34441
TAGGTAGTTTCCTGTTGTTGGGAT	hsa-miR-148a-3p|-1|-1	33.746	25.2381	1.33711
TAGGTAGTTTCCTGTTGTTGGGT	hsa-miR-142-3p|+1|+1	7.7551	5.82353	1.33168
TAGGTAGTTTCCTGTTGTTGGGTT	hsa-miR-103a-3p|+1|-1(+1U)	8.22857	6.18182	1.33109
TAGGTAGTTTCCTGTTGTTGG	hsa-miR-146b-5p|0|-1(+1U)	334.73	251.476	1.33106
TAGGTAGTTTCCTGTTGTTGGT	hsa-let-7f-5p|0|-2	10.7407	8.08333	1.32875
TAGGTAGTTTCCTGTTGTTG	hsa-miR-1246|0|-1	5.64286	4.25	1.32773
TAGGTAGTTTCCTGTTGTT	hsa-miR-320a-3p|0|+3	68.1639	51.541	1.32252
TCACCACCTTCTCCACCCAGCA	hsa-miR-654-3p|0|-2	7.69643	5.82353	1.32161
TCACCACCTTCTCCACCCAGC	hsa-miR-181b-5p|0|-3(+1U)	29.7857	22.5484	1.32097
TTCACCACCTTCTCCACCCAGCA	hsa-let-7b-5p|+3|+1	6.18367	4.68182	1.32078
TTCACCACCTTCTCCACCCAGCAT	hsa-miR-132-3p|0|0(+1U)	86.7143	65.7581	1.31869
TTCACCACCTTCTCCACCCAGCT	hsa-miR-99a-5p|0|0(+1U)	4.88679	3.70588	1.31866
TTCACCACCTTCTCCACCCAG	hsa-miR-148a-3p|0|+2(+1U)	33.2381	25.2381	1.31698
TTCACCACCTTCTCCACCCAGT	hsa-miR-151a-3p|0|+1(+1U)	8.75472	6.66038	1.31445
TTCACCACCTTCTCCACCCA	hsa-let-7a-5p|+1|0	8.04878	6.12903	1.31322
TTCACCACCTTCTCCACCCAT	hsa-miR-30e-3p|+2|-1(+1U)	6.21154	4.73333	1.3123
TTCACCACCTTCTCCACCC	hsa-miR-26b-5p|0|+1(+1U)	72.4839	55.2381	1.31221
TTCACCACCTTCTCCACC	hsa-miR-155-5p|0|-2	7.75439	5.92	1.30986
CTTCACCACCTTCTCCACCCAGC	hsa-miR-181b-5p|+1|-3	29.5333	22.5484	1.30978
CAGTAGTCTGCACATTGGTTAG	hsa-miR-127-3p|-1|-2(+1U)	10.619	8.125	1.30696
CAGTAGTCTGCACATTGGTTA	hsa-let-7c-5p|+1|0	35.5	27.2063	1.30484
CAGTAGTCTGCACATTGGTTAT	hsa-miR-532-3p|0|+1	629.508	483.841	1.30106
CAGTAGTCTGCACATTGGTT	hsa-miR-582-5p|+2|0	12.2727	9.44118	1.29992
CAGTAGTCTGCACATTGGTTT	hsa-miR-1306-5p|0|-1	8.76923	6.75	1.29915
CAGTAGTCTGCACATTGGT	hsa-miR-616-5p|0|-1	11.4167	8.7931	1.29837
CAGTAGTCTGCACATTGG	hsa-miR-92b-3p|0|-3	5	3.85417	1.2973
GTAGTCTGCACATTGGTT	hsa-miR-150-5p|0|-3	39.35	30.4355	1.2929
ACAGTAGTCTGCACATTGGTTAG	hsa-miR-452-5p|0|+2	9.66667	7.47727	1.29281
ACAGTAGTCTGCACATTGGTTAGA	hsa-miR-30e-3p|0|-3	6.10204	4.73333	1.28916
ACAGTAGTCTGCACATTGGTTAT	hsa-miR-1269a|-1|-2	15.1	11.7273	1.2876
ACAGTAGTCTGCACATTGGTT	hsa-miR-17-5p|-1|-3	208.365	162.27	1.28407
ACAGTAGTCTGCACATTGGTTT	hsa-miR-181b-5p|0|+2(+1U)	28.9524	22.5484	1.28401
ACAGTAGTCTGCACATTGGTTTT	hsa-miR-191-5p|+3|-1	6.2766	4.88889	1.28385
ACAGTAGTCTGCACATTGGT	hsa-miR-10399-5p|0|+1	25.6393	20	1.28197
ACAGTAGTCTGCACATTGG	hsa-miR-6511b-3p|0|+1	5	3.90323	1.28099
ACAGTAGTCTGCACATTG	hsa-miR-513c-5p|0|+1	5.34615	4.175	1.28052
TACAGTAGTCTGCACATTGGTTAG	hsa-miR-1307-3p|+1|0(+2U)	10.6458	8.31373	1.28051
TACAGTAGTCTGCACATTGGTTA	hsa-miR-181a-2-3p|0|-1	15.675	12.2667	1.27785
TACAGTAGTCTGCACATTGGTTAT	hsa-miR-194-3p|0|0(+1U)	27.3793	21.4262	1.27784
TACAGTAGTCTGCACATTGGTT	hsa-miR-99b-5p|+2|-1	26.8793	21.1207	1.27265
TACAGTAGTCTGCACATTGGTTT	hsa-miR-99a-5p|0|-1	4.71429	3.70588	1.27211
TACAGTAGTCTGCACATTGGT	hsa-miR-200c-3p|0|-1	14.65	11.5323	1.27035
TACAGTAGTCTGCACATTGG	hsa-miR-328-3p|+1|0	12.9344	10.2115	1.26665
TACAGTAGTCTGCACATTG	hsa-miR-199a-3p|-1|+1	7.28889	5.75556	1.26641
CCAGTGTTCAGACTACCTGTTC	hsa-miR-509-3p|0|+1(+2U)	9.2807	7.33333	1.26555
CCAGTGTTCAGACTACCTGTT	hsa-miR-24-3p|0|-1(+2U)	23.6349	18.6923	1.26442
CCCAGTGTTCAGACTACCTGTTCA	hsa-miR-505-3p|0|-2	13.3115	10.5849	1.25759
CCCAGTGTTCAGACTACCTGTTCT	hsa-miR-99b-3p|0|-4	13.7414	11.0345	1.24531
CCCAGTGTTCAGACTACCTGTT	hsa-miR-660-5p|0|+1	8.53125	6.87755	1.24045
CCCAGTGTTCAGACTACCTGTTT	hsa-miR-22-3p|0|+1(+1U)	18.2857	14.7458	1.24007
CCCAGTGTTCAGACTACCTGT	hsa-miR-23a-5p|0|-1	156.698	126.81	1.2357
CCCAGTGTTCAGACTACCTG	hsa-miR-30a-3p|+1|0	95.5323	77.5397	1.23204
CCCAGTGTTCAGACTACCT	hsa-miR-4440|0|0(+1U)	14	11.4355	1.22426
CCCAGTGTTCAGACTACC	hsa-miR-30e-3p|0|-1(+2U)	5.78846	4.73333	1.22291
CCCAGTGTTTAGACTATCTGTTCA	hsa-miR-144-5p|+1|0	9.82692	8.03922	1.22237
CCCAGTGTTTAGACTATCTGTTCT	hsa-miR-16-5p|+2|0	2192.65	1794.38	1.22195
CCCAGTGTTTAGACTATCTGTT	hsa-miR-589-5p|0|-2	10	8.1875	1.22137
CCCAGTGTTTAGACTATCTGT	hsa-miR-508-3p|0|+1	47.0159	38.5238	1.22044
CCCAGTGTTTAGACTATCTG	hsa-miR-30e-3p|+1|-1	5.76364	4.73333	1.21767
TGTGCAAATCTATGCAAAACTG	hsa-miR-101-3p|0|0(+1U)	49.7619	41.0806	1.21132
AGTTTTGCAGGTTTGCATCCAG	hsa-miR-196b-5p|0|+1	14.623	12.0741	1.2111
TGTGCAAATCCATGCAAAACTG	hsa-miR-338-3p|-1|+1	10.9348	9.03125	1.21077
TGTGCAAATCCATGCAAAACTGT	hsa-miR-451a|0|+3	10.1579	8.41176	1.20758
TGTGCAAATCCATGCAAAACT	hsa-miR-92a-3p|+4|0	6.27083	5.2	1.20593
TGTGCAAATCCATGCAAAAC	hsa-let-7a-5p|-1|0	7.38889	6.12903	1.20556
CTGTGCAAATCCATGCAAAACTGA	hsa-miR-338-3p|-1|-1	10.8814	9.03125	1.20486
CATCTTACCGGACAGTGCTGG	hsa-miR-10399-5p|+2|+1	24.0317	20	1.20159
TAATACTGCCTGGTAATGATGAC	hsa-miR-30e-3p|0|-1(+1U)	5.67391	4.73333	1.19871
TAATACTGCCTGGTAATGATGACT	hsa-miR-513c-5p|0|-1	5	4.175	1.1976
TAATACTGCCTGGTAATGATG	hsa-miR-27b-3p|-1|-2	10.0339	8.38889	1.19609
TAATACTGCCGGGTAATGATGGAT	hsa-miR-320a-3p|0|0(+3U)	61.623	51.541	1.19561
TAATACTGCCGGGTAATGATGG	hsa-miR-92a-3p|+3|0	6.20408	5.2	1.19309
TAATACTGCCGGGTAATGATGGT	hsa-miR-181a-2-3p|-1|-1(+1U)	14.6102	12.2667	1.19105
TAATACTGCCGGGTAATGATG	hsa-miR-451a|+1|+1	9.98113	8.41176	1.18657
TAATACTGCCGGGTAATG	hsa-miR-103a-3p|0|-1	7.33333	6.18182	1.18627
TGAAATGTTTAGGACCACTAGA	hsa-miR-92a-3p|0|-1	6.16667	5.2	1.1859
TGAAATGTTTAGGACCACTAG	hsa-miR-99b-3p|0|-1	13.0794	11.0345	1.18532
TGAAATGTTTAGGACCACTAGT	hsa-miR-140-3p|+1|+1(+1U)	24.322	20.5968	1.18087
TGAAATGTTTAGGACCACTAGTT	hsa-miR-5698|0|+1	67.8571	57.7778	1.17445
TGAAATGTTTAGGACCACTA	hsa-miR-92b-3p|0|0(+1U)	4.52174	3.85417	1.17321
TGAAATGTTTAGGACCACTAT	hsa-miR-92a-3p|+1|+1(+2U)	6.09524	5.2	1.17216
TGAAATGTTTAGGACCACT	hsa-miR-29a-3p|0|-4	21.6078	18.4407	1.17175
GTGAAATGTTTAGGACCACTAGA	hsa-miR-509-3p|0|0(+1U)	8.58621	7.33333	1.17085
GTGAAATGTTTAGGACCACTAGT	hsa-miR-454-3p|0|-1	5.26471	4.5	1.16993
GTGAAATGTTTAGGACCACTA	hsa-miR-140-3p|+5|+3	24.0508	20.5968	1.1677
GTGAAATGTTTAGGACCACTAT	hsa-miR-132-3p|0|-1	76.6349	65.7581	1.16541
GTGAAATGTTTAGGACCACT	hsa-miR-1299|0|-1(+1U)	17.0164	14.6333	1.16285
TGTGAAATGTTTAGGACCACTAGA	hsa-miR-15b-5p|0|-2	10.98	9.45455	1.16135
TGTGAAATGTTTAGGACCACTAG	hsa-miR-191-5p|+1|+1	5.67308	4.88889	1.1604
TTGTGAAATGTTTAGGACCACTAG	hsa-miR-101-3p|0|-2(+1U)	47.6032	41.0806	1.15877
TTCCCTTTGTCATCCTATGCCTG	hsa-miR-99a-5p|+2|-1	4.29091	3.70588	1.15786
TTCCCTTTGTCATCCTATGCCTGT	hsa-miR-320b|0|-1(+1U)	22.8413	19.7593	1.15598
TTCCCTTTGTCATCCTATGCCTGA	hsa-miR-30e-5p|+1|0	18.386	15.9111	1.15554
TTCCCTTTGTCATCCTATGCCTT	hsa-miR-151a-3p|-2|0(+1U)	7.64583	6.66038	1.14796
TTCCCTTTGTCATCCTATGCCTTT	hsa-miR-15b-3p|0|-2	26.1587	22.7903	1.1478
TTCCCTTTGTCATCCTATGCC	hsa-miR-191-5p|0|-1	5.61111	4.88889	1.14773
TTCCCTTTGTCATCCTATGC	hsa-miR-100-5p|0|-3(+1U)	52.619	45.8689	1.14716
TTCCCTTTGTCATCCTATG	hsa-miR-101-3p|0|-1(+2U)	47.082	41.0806	1.14609
TCCTTCATTCCACCGGAGTCTGT	hsa-miR-127-3p|-1|-1	9.29787	8.125	1.14435
TCCTTCATTCCACCGGAGTCTGTT	hsa-miR-28-3p|0|0(+2U)	29.7581	26.1522	1.13788
TCCTTCATTCCACCGGAGTCT	hsa-miR-152-3p|0|0(+1U)	5.81818	5.11905	1.13658
TCCTTCATTCCACCGGAGTCTT	hsa-miR-199a-3p|-1|-1	6.53659	5.75556	1.1357
TCCTTCATTCCACCGGAGTC	hsa-miR-151a-3p|0|+2(+1U)	7.55357	6.66038	1.13411
TCCTTCATTCCACCGGAGT	hsa-miR-103a-3p|+2|-1	6.98148	6.18182	1.12936
AAGTGCTTATAGTGCAGGTAG	hsa-miR-509-3p|0|0(+3U)	8.27083	7.33333	1.12784
TAAAGTGCTTATAGTGCAGGTAGT	hsa-miR-15b-5p|0|-4	10.6522	9.45455	1.12667
TAAAGTGCTTATAGTGCAGGTA	hsa-let-7c-5p|0|+2	30.5714	27.2063	1.12369
TAAAGTGCTTATAGTGCAGGTAT	hsa-miR-151a-3p|0|0(+2U)	7.46154	6.66038	1.12029
TAAAGTGCTTATAGTGCAGGT	hsa-miR-151a-3p|0|0(+1U)	7.45455	6.66038	1.11924
TAAAGTGCTTATAGTGCAGG	hsa-miR-455-3p|-2|-1	4.52778	4.04545	1.11923
ACTGTAGTATGGGCACTTCCAGT	hsa-miR-409-5p|0|-2	6.85417	6.13208	1.11776
ACTGTAGTATGGGCACTTCCA	hsa-miR-26b-3p|0|-2	9.62857	8.61818	1.11724
ACTGTAGTATGGGCACTTCC	hsa-miR-574-5p|0|-5	8.92	8	1.115
ACTGTAGTATGGGCACTTC	hsa-miR-30c-5p|0|-2	19.6667	17.7018	1.111
AAAGTGCTCATAGTGCAGGTAG	hsa-miR-126-3p|+1|0	6.44444	5.80328	1.11048
AGTGCTCATAGTGCAGGTAG	hsa-miR-103a-3p|+2|0(+1U)	6.84615	6.18182	1.10747
CAAAGTGCTCATAGTGCAGGTAGT	hsa-miR-615-3p|0|-2	3.875	3.5	1.10714
CAAAGTGCTCATAGTGCAGGTA	hsa-miR-652-3p|0|-2	29.6875	26.8824	1.10435
CAAAGTGCTCATAGTGCAGGTAT	hsa-miR-1269b|0|0(+1U)	8.90196	8.07407	1.10254
CAAAGTGCTCATAGTGCAGGT	hsa-miR-320b|+1|-2	21.7368	19.7593	1.10008
TGTGCGTGTGACAGCGGCTGA	hsa-miR-767-3p|0|-2	29.6032	26.9206	1.09965
CTGTGCGTGTGACAGCGGCTGAT	hsa-miR-17-3p|+1|0	570.365	520.571	1.09565
CTGTGCGTGTGACAGCGGCTGATT	hsa-miR-6511b-3p|+2|+1(+1U)	4.26667	3.90323	1.09311
CTGTGCGTGTGACAGCGGCTG	hsa-miR-3200-3p|0|-1	6.55738	6	1.0929
CTGTGCGTGTGACAGCGGCTGT	hsa-miR-1269b|0|-4	8.8125	8.07407	1.09146
CTGTGCGTGTGACAGCGGCTGTT	hsa-let-7g-5p|0|+1	4.33929	4	1.08482
CTGTGCGTGTGACAGCGGCTGTTT	hsa-miR-140-5p|0|-2	222.825	205.508	1.08427
CTGTGCGTGTGACAGCGGCT	hsa-miR-411-5p|-1|0	14.0909	13.0526	1.07955
CTGTGCGTGTGACAGCGGCTT	hsa-miR-708-3p|+1|+1	5.47917	5.07692	1.07923
CTGTGCGTGTGACAGCGGCTTT	hsa-miR-425-3p|-1|-2	11.5968	10.7619	1.07758
CTGTGCGTGTGACAGCGGCTTTT	hsa-miR-3180|0|+1	4.62264	4.29032	1.07746
CTGTGCGTGTGACAGCGGC	hsa-miR-199a-3p|+1|-2	6.19608	5.75556	1.07654
CTGTGCGTGTGACAGCGG	hsa-miR-151a-3p|+1|+1(+1U)	7.16	6.66038	1.07501
ACTGTGCGTGTGACAGCGGCTGAT	hsa-miR-582-5p|0|-1	10.1296	9.44118	1.07292
ACTGTGCGTGTGACAGCGGCTGA	hsa-miR-27b-3p|0|+1(+1U)	9	8.38889	1.07285
ACTGTGCGTGTGACAGCGGCTGT	hsa-miR-26b-3p|0|-1	9.24138	8.61818	1.07231
TTCCCTTTGTCATCCTTCGCCTA	hsa-miR-222-3p|0|-1	13.1356	12.2727	1.07031
TTCCCTTTGTCATCCTTCGCCTAT	hsa-miR-10b-5p|+1|-3(+1U)	40	37.381	1.07006
TTCCCTTTGTCATCCTTCGCCTATT	hsa-miR-589-5p|0|+1	8.73913	8.1875	1.06737
TTCCCTTTGTCATCCTTCGCCTAG	hsa-miR-767-3p|0|-3	28.7213	26.9206	1.06689
TTCCCTTTGTCATCCTTCGCCTT	hsa-miR-186-5p|0|-2	6.61538	6.23077	1.06173
TTCCCTTTGTCATCCTTCGCCTTT	hsa-miR-203a-3p|-2|0	11.3333	10.678	1.06138
TTCCCTTTGTCATCCTTCGCCTTTT	hsa-let-7b-5p|0|+1(+3U)	4.96226	4.68182	1.0599
TTCCCTTTGTCATCCTTCGCCTTTTT	hsa-miR-342-3p|0|+1(+1U)	4.28125	4.05405	1.05604
TTCCCTTTGTCATCCTTCGCC	hsa-miR-421|0|-1(+1U)	13.661	12.9434	1.05544
TTCCCTTTGTCATCCTTCGC	hsa-miR-374a-3p|0|0(+1U)	1069.98	1020.76	1.04822
TTCCCTTTGTCATCCTTCGCT	hsa-miR-29a-3p|-1|-3	19.3226	18.4407	1.04782
TTCCCTTTGTCATCCTTCG	hsa-miR-186-5p|+1|0	6.52174	6.23077	1.0467
TTCCCTTTGTCATCCTTCGT	hsa-miR-542-5p|0|-2	55.5932	53.1475	1.04602
TTCCCTTTGTCATCCTTC	hsa-miR-629-5p|0|-1	7.275	6.96552	1.04443
TAACAGTCTCCAGTCACGGCCA	hsa-miR-30e-5p|0|-1	16.6066	15.9111	1.04371
TAACAGTCTCCAGTCACGGCCAT	hsa-miR-6892-5p|0|-1	8.43103	8.09259	1.04182
TAACAGTCTCCAGTCACGG	hsa-miR-195-5p|0|-2	54.8254	52.7619	1.03911
ACAGCAGGCACAGACAGGCAG	hsa-miR-125a-5p|0|-1	8.89744	8.56897	1.03833
TACAGCAGGCACAGACAGGCAGT	hsa-miR-19b-3p|0|-2	17.4062	16.7667	1.03815
TACAGCAGGCACAGACAGGCAG	hsa-let-7b-5p|0|-3(+3U)	4.85106	4.68182	1.03615
GCCTGTCTACACTTGCTGTGC	hsa-miR-4652-5p|0|-1	14.7679	14.2581	1.03575
TGCCTGTCTACACTTGCTGTG	hsa-let-7c-5p|-2|-2	28.15	27.2063	1.03468
TGACCTATGAATTGACAG	hsa-miR-150-5p|-2|-2	31.4545	30.4355	1.03348
ATGACCTATGAATTGACAGACA	hsa-miR-150-5p|+1|0	31.4242	30.4355	1.03249
AGCTTATCAGACTGATGTTGAC	hsa-miR-455-3p|-1|-1	4.16327	4.04545	1.02912
AGCTTATCAGACTGATGTTGACT	hsa-miR-508-3p|0|-2(+2U)	39.6032	38.5238	1.02802
AGCTTATCAGACTGATGTTGA	hsa-miR-425-5p|+2|+1	6.71154	6.53333	1.02728
AGCTTATCAGACTGATGTTG	hsa-miR-181b-3p|0|-1(+1U)	7.86538	7.66667	1.02592
GCTTATCAGACTGATGTTGAC	hsa-miR-99a-5p|0|-2	3.79592	3.70588	1.0243
GCTTATCAGACTGATGTTGACT	hsa-miR-19b-1-5p|0|-1	6.42105	6.275	1.02328
GCTTATCAGACTGATGTTGA	hsa-miR-409-5p|0|-1	6.26786	6.13208	1.02214
GCTTATCAGACTGATGTTG	hsa-miR-197-3p|0|+2	44.4	43.4426	1.02204
CTTATCAGACTGATGTTGAC	hsa-miR-181a-5p|+2|0	6.26667	6.14035	1.02057
CTTATCAGACTGATGTTGACT	hsa-miR-509-3p|+3|0	7.47826	7.33333	1.01976
CTTATCAGACTGATGTTGA	hsa-miR-151a-3p|0|0(+3U)	6.77966	6.66038	1.01791
CTTATCAGACTGATGTTG	hsa-miR-320a-3p|+2|0(+1U)	52.4138	51.541	1.01693
TTATCAGACTGATGTTGAC	hsa-miR-525-5p|0|+1	21.7321	21.4098	1.01505
TTATCAGACTGATGTTGACT	hsa-miR-24-3p|0|-2(+1U)	18.9508	18.6923	1.01383
TTATCAGACTGATGTTGA	hsa-let-7a-5p|-1|-1	6.21154	6.12903	1.01346
TATCAGACTGATGTTGAC	hsa-miR-425-5p|+1|+2	6.61538	6.53333	1.01256
TATCAGACTGATGTTGACT	hsa-miR-155-5p|0|-3	5.98148	5.92	1.01039
TATCAGACTGATGTTGACTGTT	hsa-miR-1843|-2|0]	317.274	314.492	1.00885
TAGCTTATCAGACTGATGTTGAC	hsa-miR-142-3p|0|-1	5.87097	5.82353	1.00815
TAGCTTATCAGACTGATGTTGACT	hsa-miR-338-3p|-1|-3	9.08197	9.03125	1.00562
TAGCTTATCAGACTGATGTTGACTT	hsa-miR-142-5p|0|-1	5.43182	5.40426	1.0051
TAGCTTATCAGACTGATGTTGACTG	hsa-miR-203a-3p|0|0(+1U)	10.7143	10.678	1.0034
TAGCTTATCAGACTGATGTTGACTGT	hsa-miR-199a-3p|0|-3	5.77273	5.75556	1.00298
TAGCTTATCAGACTGATGTTGACTGTT	hsa-miR-146b-5p|0|-1	252.048	251.476	1.00228
TAGCTTATCAGACTGATGTTGAT	hsa-miR-103a-3p|+1|-1	6.17647	6.18182	0.999135
TAGCTTATCAGACTGATGTTG	hsa-miR-28-3p|0|-2	26.1228	26.1522	0.998877
TAGCTTATCAGACTGATGTTGT	hsa-miR-92a-3p|0|+3	5.18333	5.2	0.996795
TAGCTTATCAGACTGATGTT	hsa-miR-215-5p|0|+1	33.4333	33.5484	0.996571
TAGCTTATCAGACTGATGTTT	hsa-miR-576-5p|0|-1	38.5172	38.7436	0.994158
TAGCTTATCAGACTGATGT	hsa-let-7f-5p|0|-4	8.02941	8.08333	0.993329
TAGCTTATCAGACTGATG	hsa-miR-509-3p|0|-1(+2U)	7.2549	7.33333	0.989305
GTAGCTTATCAGACTGATGTTGAC	hsa-miR-132-3p|0|-4	64.873	65.7581	0.986541
GTAGCTTATCAGACTGATGTTGA	hsa-miR-191-5p|0|-1(+1U)	4.80702	4.88889	0.983254
GTAGCTTATCAGACTGATGTTG	hsa-let-7d-5p|0|-4	6.87097	7	0.981567
GTAGCTTATCAGACTGATGTT	hsa-miR-432-5p|0|-2	5.53333	5.6875	0.972894
GTAGCTTATCAGACTGATGT	hsa-miR-1269a|0|-1(+3U)	11.3793	11.7273	0.970329
GTAGCTTATCAGACTGATG	hsa-miR-1269b|0|-2	7.81481	8.07407	0.96789
TACTGCATCAGGAACTGATTGG	hsa-let-7d-3p|0|-2	48.5	50.1129	0.967815
ATACTGCATCAGGAACTGATTGG	hsa-miR-29c-5p|+1|+1	18.5645	19.1864	0.967585
TTGTGCTTGATCTAACCATGTG	hsa-let-7a-3p|+1|+2	10.4839	10.8367	0.967438
TTGTGCTTGATCTAACCATGTGT	hsa-miR-6892-5p|0|+1	7.81034	8.09259	0.965123
TTGTGCTTGATCTAACCATGTGG	hsa-miR-24-3p|0|0(+2U)	17.9833	18.6923	0.962071
TTGTGCTTGATCTAACCATGTGGT	hsa-miR-508-5p|0|-3	4.7451	4.94643	0.959298
TTGTGCTTGATCTAACCATG	hsa-miR-506-3p|-2|-1	21.7833	22.7581	0.95717
AGAGTTGAGTCTGGACGTCCCGA	hsa-miR-30e-3p|+1|-3	4.52778	4.73333	0.956573
AGAGTTGAGTCTGGACGTCCCGT	hsa-miR-199a-3p|0|-1(+1U)	5.5	5.75556	0.955598
AGAATTGTGGCTGGACATCTG	hsa-miR-425-5p|+3|0	6.23684	6.53333	0.954619
GCTACATTGTCTGCTGGGTTTC	hsa-miR-937-3p|0|-2	5.85455	6.14286	0.953066
GCTACATTGTCTGCTGGGTTT	hsa-let-7a-5p|-1|0	5.83673	6.12903	0.952309
GCTACATTGTCTGCTGGGTT	hsa-let-7g-5p|+4|0	3.80488	4	0.95122
GCTACATTGTCTGCTGGGT	hsa-miR-148a-3p|0|-1	23.9839	25.2381	0.950304
AGCTACATTGTCTGCTGGGTTTCA	hsa-miR-744-3p|0|-2(+1U)	57.9344	61.1639	0.947199
AGCTACATTGTCTGCTGGGTTTCT	hsa-miR-10b-5p|+3|-1	35.2807	37.381	0.943815
AGCTACATTGTCTGCTGGGTTT	hsa-miR-10b-5p|+1|-1(+2U)	35.254	37.381	0.9431
AGCTACATTGTCTGCTGGGTTTT	hsa-miR-582-3p|0|-1(+1U)	87.8167	93.7917	0.936295
AGCTACATTGTCTGCTGGGTTTTT	hsa-miR-584-5p|+1|0	101.655	108.717	0.935041
AGCTACATTGTCTGCTGGGTT	hsa-miR-92a-3p|0|+3	4.85714	5.2	0.934066
AGCTACATTGTCTGCTGGGT	hsa-miR-141-5p|0|-1	31.7833	34.082	0.932556
AGCTACATTGTCTGCTGGG	hsa-miR-509-3p|0|+1	6.81356	7.33333	0.929122
AGCTACATTGTCTGCTGG	hsa-miR-363-3p|+1|0	12.4423	13.4182	0.927272
GCTACATCTGGCTACTGGGTCT	hsa-miR-142-5p|-1|-3	5	5.40426	0.925197
GCTACATCTGGCTACTGGGTCTC	hsa-let-7g-5p|0|-2	3.7	4	0.925
GCTACATCTGGCTACTGGGT	hsa-miR-497-5p|0|+1	5.56604	6.02	0.924591
AGCTACATCTGGCTACTGGGTC	hsa-miR-513b-5p|0|+1	31.7258	34.3492	0.923626
AGCTACATCTGGCTACTGGGTCT	hsa-miR-191-5p|0|+1	4.5	4.88889	0.920455
AGCTACATCTGGCTACTGGGTCTT	hsa-miR-34a-5p|0|+2	6.97826	7.58696	0.919771
AGCTACATCTGGCTACTGGGTCTTT	hsa-miR-203a-3p|+1|-1	9.81481	10.678	0.919165
AGCTACATCTGGCTACTGGGTCTC	hsa-miR-320a-3p|0|+1	47.2295	51.541	0.916349
AGCTACATCTGGCTACTGGGTCTCT	hsa-miR-126-3p|-1|-1	5.30612	5.80328	0.914332
AGCTACATCTGGCTACTGGGTCTCTT	hsa-miR-22-3p|0|-4(+4U)	13.4815	14.7458	0.914261
AGCTACATCTGGCTACTGGG	hsa-miR-125b-5p|0|-1(+1U)	7.92	8.70909	0.909395
AGCTACATCTGGCTACTGG	hsa-miR-218-5p|0|-1	9.15789	10.082	0.908344
GTCAGTTTGTCAAATACCCCAA	hsa-miR-92a-3p|0|+2(+1U)	4.71154	5.2	0.906065
GTCAGTTTGTCAAATACCCCAAT	hsa-miR-942-5p|+2|+3	12.2203	13.5238	0.903617
GTCAGTTTGTCAAATACCCCAAG	hsa-miR-181a-2-3p|-1|-1	11.0513	12.2667	0.90092
GTCAGTTTGTCAAATACCCCA	hsa-miR-186-5p|0|+2	5.61224	6.23077	0.900731
GTCAGTTTGTCAAATACCCCAT	hsa-miR-146b-3p|0|-3	975.19	1085.71	0.898202
GTCAGTTTGTCAAATACCCC	hsa-miR-500a-5p|0|+1	8.16327	9.1	0.897062
TGTCAGTTTGTCAAATACCCCAA	hsa-let-7a-5p|0|-4	5.49057	6.12903	0.895829
TGTCAGTTTGTCAAATACCCCAAT	hsa-miR-23a-3p|0|+3	709.429	792.508	0.895169
TGTCAGTTTGTCAAATACCCCAAG	hsa-miR-221-3p|0|-1(+2U)	22.7636	25.4828	0.893296
TGTCAGTTTGTCAAATACCCCAT	hsa-miR-503-3p|0|-1	8.13793	9.11111	0.893188
TGTCAGTTTGTCAAATACCCCATT	hsa-miR-486-5p|0|-1	8.5	9.51786	0.893058
TGTCAGTTTGTCAAATACCCC	hsa-miR-204-5p|0|-1	101.161	113.524	0.891102
TGTCAGTTTGTCAAATACCCCT	hsa-miR-155-5p|0|-1	5.26415	5.92	0.889215
TGTCAGTTTGTCAAATACCC	hsa-miR-152-3p|-1|0	4.54717	5.11905	0.888284
TGTCAGTTTGTCAAATACC	hsa-miR-103a-3p|0|0(+2U)	5.48889	6.18182	0.887908
GTGTCAGTTTGTCAAATACCCCA	hsa-miR-338-3p|0|+2	8	9.03125	0.885813
AGCTGCCAGTTGAAGAACTGTT	hsa-miR-1301-3p|+3|+1	41.3443	46.8065	0.883303
AGCTGCCAGTTGAAGAACTGTTT	hsa-let-7a-5p|0|-3(+1U)	5.40385	6.12903	0.88168
AGCTGCCAGTTGAAGAACTGT	hsa-miR-512-3p|0|-1	9.67925	10.9833	0.881267
AGCTGCCAGTTGAAGAACTG	hsa-miR-92a-3p|+1|+2	4.5625	5.2	0.877404
AGCTGCCAGTTGAAGAACT	hsa-miR-92a-3p|0|+1(+3U)	4.54717	5.2	0.874456
GCTGCCAGTTGAAGAACTGTT	hsa-miR-425-3p|-1|-1	9.40385	10.7619	0.873809
GCTGCCAGTTGAAGAACTGT	hsa-miR-508-3p|+4|0	33.6379	38.5238	0.873172
GCTGCCAGTTGAAGAACTG	hsa-miR-423-3p|-1|0	8.01852	9.20339	0.871257
CTGCCAGTTGAAGAACTGT	hsa-miR-378a-3p|+3|0	346.46	398.079	0.87033
AAGCTGCCAGTTGAAGAACTGTT	hsa-miR-92a-3p|0|-2(+3U)	4.52273	5.2	0.869755
AAGCTGCCAGTTGAAGAACTGTTT	hsa-miR-320a-3p|+2|+2(+1U)	44.8167	51.541	0.869535
AAGCTGCCAGTTGAAGAACTGTTG	hsa-miR-140-3p|0|0(+1U)	17.8966	20.5968	0.868901
AAGCTGCCAGTTGAAGAACTG	hsa-miR-1307-3p|0|-1(+1U)	7.21622	8.31373	0.867988
AAGCTGCCAGTTGAAGAACT	hsa-miR-199a-3p|+1|+1	4.97917	5.75556	0.865106
AAGCTGCCAGTTGAAGAACTT	hsa-miR-99a-5p|+2|0	3.20455	3.70588	0.864719
AAGCTGCCAGTTGAAGAACTTT	hsa-miR-10a-5p|+1|-4	150.73	174.587	0.863351
AAGCTGCCAGTTGAAGAAC	hsa-miR-34a-5p|0|+1(+1U)	6.54167	7.58696	0.862225
AAGCTGCCAGTTGAAGAA	hsa-miR-127-3p|+1|-1	6.98276	8.125	0.859416
AAGCTGCCAGTTGAAGAAT	hsa-miR-103a-3p|+4|-1(+1U)	5.30909	6.18182	0.858824
AAGCTGCCAGTTGAAGAATTTT	hsa-miR-196a-5p|0|-1	9.0566	10.566	0.857143
AAAGCTGCCAGTTGAAGAACTGT	hsa-miR-140-3p|0|+1(+2U)	17.65	20.5968	0.85693
AGTTCTTCAGTGGCAAGCTTT	hsa-miR-505-3p|0|-3	9.05357	10.5849	0.855328
AGTTCTTCAGTGGCAAGCTT	hsa-miR-127-3p|0|+1	6.9375	8.125	0.853846
TGTCCTTGCTGTTTGGAGATA	hsa-let-7c-5p|0|-3	23.2222	27.2063	0.853559
ATCCCCAGATACAATGGACAAT	hsa-miR-508-3p|+1|-1	32.871	38.5238	0.853264
ATCCCCAGATACAATGGACAATA	hsa-miR-103a-3p|+4|+1	5.26	6.18182	0.850882
ATCCCCAGATACAATGGACA	hsa-miR-26a-5p|+1|-2	15	17.6452	0.850091
ATCCCCAGATACAATGGAC	hsa-miR-99b-5p|0|0(+2U)	17.9492	21.1207	0.849837
TCACATTGCCAGGGATTTCCA	hsa-miR-4454|+3|+1	5.82222	6.85106	0.849827
TCACATTGCCAGGGATTTCCAT	hsa-miR-30e-3p|-1|-1(+1U)	4.01961	4.73333	0.849213
TCACATTGCCAGGGATTTCCAA	hsa-let-7f-5p|-1|0	6.86441	8.08333	0.849205
TCACATTGCCAGGGATTTCCAAT	hsa-miR-660-5p|0|+3	5.83784	6.87755	0.848825
TCACATTGCCAGGGATTTCCAAC	hsa-miR-30b-5p|0|-1	3.37037	3.97727	0.847407
TCACATTGCCAGGGATTTCCAACT	hsa-miR-150-5p|+1|-1	25.7308	30.4355	0.84542
TCACATTGCCAGGGATTTCC	hsa-let-7a-5p|-1|+1	5.18	6.12903	0.845158
TCACATTGCCAGGGATTTC	hsa-miR-1301-3p|+1|0	39.4921	46.8065	0.843731
TCACATTGCCAGGGATTT	hsa-miR-152-3p|0|-1(+1U)	4.31481	5.11905	0.842894
CACATTGCCAGGGATTTCCA	hsa-miR-151a-3p|+1|-2	5.61017	6.66038	0.84232
CACATTGCCAGGGATTTCCAT	hsa-miR-196a-5p|0|-2	8.88571	10.566	0.840969
CACATTGCCAGGGATTTCCAA	hsa-miR-151a-3p|+3|+1	5.59615	6.66038	0.840216
CACATTGCCAGGGATTTCCAAT	hsa-miR-452-5p|+3|+2	6.27778	7.47727	0.839581
CACATTGCCAGGGATTTCC	hsa-miR-34a-5p|0|-1	6.36364	7.58696	0.83876
CACATTGCCAGGGATTTC	hsa-miR-339-5p|0|-4	16.6949	19.9344	0.837492
ATCACATTGCCAGGGATTTCCA	hsa-miR-532-5p|0|+2	5.14	6.15094	0.835644
ATCACATTGCCAGGGATTTCCAT	hsa-miR-342-5p|0|+2	4.7037	5.63043	0.835407
ATCACATTGCCAGGGATTTCCATT	hsa-miR-151a-3p|+3|0	5.56364	6.66038	0.835334
ATCACATTGCCAGGGATTTCCAA	hsa-miR-151a-3p|0|-2	5.52273	6.66038	0.829191
ATCACATTGCCAGGGATTTCCAAT	hsa-miR-193a-5p|0|0(+1U)	38.3036	46.5161	0.823447
ATCACATTGCCAGGGATTTCCAATT	hsa-miR-615-3p|0|-1	2.86667	3.5	0.819048
ATCACATTGCCAGGGATTTCCAAC	hsa-miR-654-3p|0|-3	4.75	5.82353	0.815657
ATCACATTGCCAGGGATTTCCT	hsa-miR-338-3p|+1|0	7.35417	9.03125	0.814302
ATCACATTGCCAGGGATTTCCTT	hsa-miR-1306-5p|0|-2	5.47826	6.75	0.811594
ATCACATTGCCAGGGATTTC	hsa-miR-93-3p|0|0(+1U)	3.53846	4.40385	0.803493
ATCACATTGCCAGGGATTTCT	hsa-let-7f-5p|-1|-1	6.49091	8.08333	0.802999
ATCACATTGCCAGGGATTT	hsa-miR-140-3p|+2|+1	16.5161	20.5968	0.801879
ATCACATTGCCAGGGATTTT	hsa-let-7a-3p|0|0(+1U)	8.68852	10.8367	0.801766
ATCACATTGCCAGGGATT	hsa-miR-338-3p|-1|0	7.23256	9.03125	0.800837
AATCACATTGCCAGGGATTTCCA	hsa-miR-378a-5p|0|-2	4.2963	5.37037	0.8
AATCACATTGCCAGGGATTTCC	hsa-miR-151a-3p|0|+2	5.32258	6.66038	0.799141
AATCACATTGCCAGGGATTTC	hsa-miR-30d-5p|0|+3	31.4839	39.5429	0.796196
AATCACATTGCCAGGGATTT	hsa-miR-509-3p|+2|+1(+2U)	5.81481	7.33333	0.792929
AATCACATTGCCAGGGATT	hsa-miR-514a-3p|-2|-2(+1U)	3.02632	3.83333	0.789474
GGGGTTCCTGGGGATGGGATT	hsa-miR-342-3p|0|-3	3.2	4.05405	0.789333
TCACATTGCCAGGGATTACCACG	hsa-miR-1307-3p|+1|+1	6.56	8.31373	0.789057
TCACATTGCCAGGGATTACCAC	hsa-miR-25-3p|+1|-1(+1U)	38.8095	49.2742	0.787624
TCACATTGCCAGGGATTACCACT	hsa-miR-18a-3p|0|-2	14.8833	18.9	0.787478
TCACATTGCCAGGGATTACCACTT	hsa-miR-25-3p|0|0(+3U)	38.7727	49.2742	0.786877
TCACATTGCCAGGGATTACCA	hsa-miR-493-5p|0|-1	9.94915	12.661	0.78581
TCACATTGCCAGGGATTACCAT	hsa-miR-148a-3p|0|-2(+1U)	19.8254	25.2381	0.785535
TCACATTGCCAGGGATTACCATT	hsa-miR-100-5p|+2|-1	36	45.8689	0.784846
TCACATTGCCAGGGATTACC	hsa-miR-92a-3p|+1|0	4.06452	5.2	0.781638
TCACATTGCCAGGGATTAC	hsa-miR-26b-3p|0|+1	6.72549	8.61818	0.780384
CACATTGCCAGGGATTACCAC	hsa-let-7a-5p|0|-3(+2U)	4.78049	6.12903	0.779974
CACATTGCCAGGGATTACCACT	hsa-let-7f-5p|+5|+4	6.2931	8.08333	0.778528
CACATTGCCAGGGATTACCA	hsa-miR-328-3p|0|-1	7.88462	10.2115	0.772128
CACATTGCCAGGGATTACC	hsa-let-7a-5p|0|-1	4.73171	6.12903	0.772015
ATCACATTGCCAGGGATTACCACG	hsa-miR-151a-3p|+1|0	5.13462	6.66038	0.77092
ATCACATTGCCAGGGATTACCACT	hsa-miR-942-5p|0|-2	10.4231	13.5238	0.77072
ATCACATTGCCAGGGATTACCACTT	hsa-miR-28-3p|+2|-1	20.1525	26.1522	0.770588
ATCACATTGCCAGGGATTACCA	hsa-miR-1307-3p|+1|+3	6.39583	8.31373	0.76931
ATCACATTGCCAGGGATTACCAT	hsa-miR-425-5p|+3|-1	5.01754	6.53333	0.767991
ATCACATTGCCAGGGATTACCATT	hsa-miR-22-3p|0|+1	11.2742	14.7458	0.764572
ATCACATTGCCAGGGATTACC	hsa-miR-223-3p|0|-1(+1U)	7.13115	9.33333	0.764052
ATCACATTGCCAGGGATTACCT	hsa-miR-103a-3p|0|-1(+2U)	4.7193	6.18182	0.763416
ATCACATTGCCAGGGATTAC	hsa-miR-92a-3p|0|+1(+2U)	3.96226	5.2	0.761974
ATCACATTGCCAGGGATTACT	hsa-miR-409-3p|-1|-3	8.29825	10.8929	0.761806
ATCACATTGCCAGGGATTA	hsa-miR-182-5p|0|-5	67.3778	88.5161	0.761192
ATCACATTGCCAGGGATTAT	hsa-miR-182-5p|0|0(+1U)	67.2759	88.5161	0.760041
AATCACATTGCCAGGGATTACC	hsa-miR-191-5p|+1|0	3.71429	4.88889	0.75974
GGCTCAGTTCAGCAGGAACAG	hsa-miR-140-5p|0|+1	156.111	205.508	0.759635
GGCTCAGTTCAGCAGGAACAGT	hsa-miR-660-5p|0|+2	5.22222	6.87755	0.759314
GGCTCAGTTCAGCAGGAACA	hsa-let-7d-5p|+1|-2	5.30435	7	0.757764
GGCTCAGTTCAGCAGGAAC	hsa-miR-425-5p|+2|0	4.93478	6.53333	0.755324
GCTCAGTTCAGCAGGAACAGG	hsa-miR-296-3p|+1|-1	10.4839	13.918	0.753258
GCTCAGTTCAGCAGGAACAGGT	hsa-miR-589-5p|0|0(+1U)	6.15625	8.1875	0.751908
GCTCAGTTCAGCAGGAACAG	hsa-miR-1180-3p|0|0(+1U)	70.7143	94.0476	0.751899
GCTCAGTTCAGCAGGAACAGT	hsa-miR-99b-5p|0|0(+3U)	15.8644	21.1207	0.751131
GCTCAGTTCAGCAGGAACAGTT	hsa-miR-27b-5p|-1|0	9.55	12.7627	0.748274
CTCAGTTCAGCAGGAACAG	hsa-miR-128-3p|0|-1	11.6	15.5323	0.746833
CTCAGTTCAGCAGGAACAGT	hsa-miR-320a-3p|0|-1(+3U)	38.2698	51.541	0.742513
CTCAGTTCAGCAGGAACA	hsa-miR-150-5p|0|-4	22.5926	30.4355	0.742311
TGGCTCAGTTCAGCAGGAACAGG	hsa-miR-151a-3p|0|+1(+2U)	4.94	6.66038	0.7417
TGGCTCAGTTCAGCAGGAACAGT	hsa-miR-378a-5p|0|+1	3.97872	5.37037	0.740866
TGGCTCAGTTCAGCAGGAACAGTT	hsa-let-7a-5p|0|+2	4.53846	6.12903	0.740486
TGGCTCAGTTCAGCAGGAACAGTTT	hsa-miR-1299|0|0(+1U)	10.8276	14.6333	0.739926
TGGCTCAGTTCAGCAGGAACA	hsa-miR-1307-3p|0|+2	6.14545	8.31373	0.739194
TGGCTCAGTTCAGCAGGAACAT	hsa-miR-320a-3p|+1|+2	37.9048	51.541	0.73543
TGGCTCAGTTCAGCAGGAACATT	hsa-miR-338-3p|0|+1	6.63415	9.03125	0.734577
TGGCTCAGTTCAGCAGGAAC	hsa-let-7b-5p|0|-4	3.43902	4.68182	0.734549
TGGCTCAGTTCAGCAGGAACT	hsa-miR-34a-5p|-1|0	5.56818	7.58696	0.733915
TGGCTCAGTTCAGCAGGAA	hsa-miR-186-5p|0|-2(+1U)	4.56098	6.23077	0.732008
TGGCTCAGTTCAGCAGGAAT	hsa-miR-503-5p|0|-1	24.3651	33.3	0.731684
TGGCTCAGTTCAGCAGGA	hsa-miR-144-5p|0|+1	5.87805	8.03922	0.731172
TGGCTCAGTTCAGCAGGAT	hsa-miR-151a-3p|-1|0(+1U)	4.86792	6.66038	0.730878
TGGCTCAGTTCAGCAGGATT	hsa-miR-502-3p|0|+1(+1U)	21.4746	29.5	0.727952
CTGGCTCAGTTCAGCAGGAACAG	hsa-miR-486-5p|0|-1(+1U)	6.92	9.51786	0.727054
CTGGCTCAGTTCAGCAGGAACAGT	hsa-let-7f-5p|+4|0	5.86486	8.08333	0.72555
CTGGCTCAGTTCAGCAGGAACA	hsa-miR-423-3p|0|-2(+1U)	6.67308	9.20339	0.725067
CTGGCTCAGTTCAGCAGGAAC	hsa-miR-10399-5p|+2|+2	14.4754	20	0.72377
ATTGCACTTGTCTCGGTCTGA	hsa-miR-423-3p|0|-2(+2U)	6.65854	9.20339	0.723487
ATTGCACTTGTCTCGGTCTGAT	hsa-miR-21-5p|-1|-2	142.968	197.921	0.722351
ATTGCACTTGTCTCGGTCTG	hsa-miR-10b-5p|0|+1	26.9836	37.381	0.721854
ATTGCACTTGTCTCGGTCTGT	hsa-miR-191-5p|+1|-1	3.51852	4.88889	0.719697
TTGCACTTGTCTCGGTCTGA	hsa-miR-125a-5p|0|-3	6.15254	8.56897	0.718003
TGCACTTGTCTCGGTCTGA	hsa-miR-942-5p|+2|+1	9.67213	13.5238	0.715193
GCACTTGTCTCGGTCTGA	hsa-miR-29a-3p|-1|-2	13.1698	18.4407	0.714172
CATTGCACTTGTCTCGGTCTGAC	hsa-miR-574-3p|+1|0	11.3729	15.9655	0.71234
CATTGCACTTGTCTCGGTCTGACT	hsa-miR-196a-5p|0|+1	7.50943	10.566	0.710714
CATTGCACTTGTCTCGGTCTGACA	hsa-miR-27b-3p|0|-2	5.96154	8.38889	0.710647
CATTGCACTTGTCTCGGTCTGAT	hsa-miR-425-5p|0|-2	4.64	6.53333	0.710204
CATTGCACTTGTCTCGGTCTGATT	hsa-let-7a-5p|0|+2	4.34375	6.12903	0.708717
CATTGCACTTGTCTCGGTCTGATTT	hsa-miR-92a-3p|0|-3	3.68421	5.2	0.708502
CATTGCACTTGTCTCGGTCTG	hsa-miR-18a-5p|0|-2	9.52542	13.4667	0.707333
CATTGCACTTGTCTCGGTCTGT	hsa-miR-125a-5p|+1|-1	6.04	8.56897	0.704869
CATTGCACTTGTCTCGGTCTGTT	hsa-let-7d-5p|0|-1	4.93333	7	0.704762
CATTGCACTTGTCTCGGTCTGTTT	hsa-miR-508-3p|-1|-1	27.1429	38.5238	0.704574
CATTGCACTTGTCTCGGTCT	hsa-miR-451a|0|-3	5.91667	8.41176	0.70338
CATTGCACTTGTCTCGGTCTT	hsa-miR-197-3p|+1|0	30.5484	43.4426	0.703189
CATTGCACTTGTCTCGGTCTTT	hsa-miR-214-5p|+1|0	7.33333	10.4333	0.702875
CATTGCACTTGTCTCGGTC	hsa-let-7f-5p|-1|-2	5.67308	8.08333	0.701824
CATTGCACTTGTCTCGGT	hsa-miR-148a-3p|0|-2	17.6508	25.2381	0.699371
TCAAGTAATCCAGGATAGGCTGT	hsa-miR-509-3p|0|-4	5.125	7.33333	0.698864
TCAAGTAATCCAGGATAGG	hsa-miR-425-5p|+2|+2	4.55102	6.53333	0.696585
TTCAAGTAATCCAGGATAGGCTG	hsa-miR-509-3p|0|-2	5.10811	7.33333	0.69656
TTCAAGTAATCCAGGATAGGCTGT	hsa-miR-10399-5p|+2|0	13.8871	20	0.694355
TTCAAGTAATCCAGGATAGGCTGTT	hsa-miR-29a-3p|+2|-1	12.7931	18.4407	0.693744
TTCAAGTAATCCAGGATAGGCTT	hsa-miR-29c-3p|0|-2	64.2381	92.6129	0.693619
TTCAAGTAATCCAGGATAGGCTTT	hsa-miR-574-5p|0|-4	5.54167	8	0.692708
TTCAAGTAATCCAGGATAGGC	hsa-miR-363-3p|0|0(+1U)	9.2931	13.4182	0.692575
TTCAAGTAATCCAGGATAGG	hsa-miR-10a-5p|-1|-2	120.823	174.587	0.692047
TTCAAGTAATCCAGGATAGGT	hsa-let-7e-5p|0|+1(+1U)	15.0179	21.7143	0.691612
TTCAAGTAATCCAGGATAG	hsa-miR-589-3p|0|-1	10.3846	15.0303	0.690912
TTCAAGTAATCCAGGATAGT	hsa-miR-432-5p|0|-3	3.92857	5.6875	0.690738
TTCAAGTAATCCAGGATA	hsa-miR-320a-3p|+2|+1(+1U)	35.4754	51.541	0.688295
TTCAAGTAATCCAGGATAT	hsa-miR-582-3p|0|-3	64.3621	93.7917	0.686224
CCTGTTCTCCATTACTTGGCTC	hsa-miR-760|-1|-3	8.42857	12.2833	0.686179
CCTGTTCTCCATTACTTGGCTCT	hsa-miR-100-5p|+4|0	31.4355	45.8689	0.685334
CCTGTTCTCCATTACTTGGCTT	hsa-miR-6842-3p|0|-1	9.10638	13.2881	0.685302
CCTGTTCTCCATTACTTGGC	hsa-miR-196b-5p|0|-2	8.25	12.0741	0.683282
CCTGTTCTCCATTACTTGG	hsa-miR-1301-3p|0|+1	31.9107	46.8065	0.681759
TTCAAGTAATTCAGGATAGGTT	hsa-miR-218-5p|0|+3	6.84906	10.082	0.679337
TTCAAGTAATTCAGGATAGGTTT	hsa-miR-151a-3p|-2|+1	4.52083	6.66038	0.678765
TTCAAGTAATTCAGGATAGGTTG	hsa-miR-148a-3p|0|-3	17.1111	25.2381	0.677987
TTCAAGTAATTCAGGATAGGTTGT	hsa-miR-423-3p|-1|-2(+1U)	6.22034	9.20339	0.675875
TTCAAGTAATTCAGGATAGG	hsa-miR-15b-5p|+3|0	6.36842	9.45455	0.673583
TTCAAGTAATTCAGGATAG	hsa-miR-532-5p|0|-1	4.13793	6.15094	0.672731
TTCACAGTGGCTAAGTTCCGCC	hsa-miR-181b-3p|0|-1(+2U)	5.13514	7.66667	0.6698
TTCACAGTGGCTAAGTTCCGCT	hsa-miR-4661-5p|0|+1	10.3621	15.5714	0.665454
TTCACAGTGGCTAAGTTCCG	hsa-miR-24-3p|0|0(+1U)	12.431	18.6923	0.665035
TTCACAGTGGCTAAGTTCCGT	hsa-miR-125b-5p|+1|-1	5.78947	8.70909	0.664762
TTCACAGTGGCTAAGTTCCGTT	hsa-miR-99b-5p|+2|0	13.9818	21.1207	0.661996
TTCACAGTGGCTAAGTTCCGTTT	hsa-miR-625-3p|-1|0	696.762	1053.11	0.661626
TTCACAGTGGCTAAGTTCC	hsa-miR-146a-5p|+1|-1	785.746	1187.75	0.661544
TTCACAGTGGCTAAGTTCCT	hsa-miR-103a-3p|0|-1(+1U)	4.08696	6.18182	0.661125
TTCACAGTGGCTAAGTTCCTT	hsa-miR-1299|0|-2(+1U)	9.67442	14.6333	0.661122
TTCACAGTGGCTAAGTTCCTTT	hsa-miR-30b-3p|0|0(+1U)	14.0357	21.25	0.660504
TTCACAGTGGCTAAGTTC	hsa-miR-576-5p|0|+1	25.569	38.7436	0.659953
GGGCTTAGCTGCTTGTGAGCA	hsa-miR-664a-3p|0|-1(+1U)	10.9643	16.6167	0.659837
AGGGCTTAGCTGCTTGTGAGC	hsa-miR-199a-3p|+1|0	3.76471	5.75556	0.654099
TTCACAGTGGCTAAGTTCTGCA	hsa-miR-211-5p|0|-3(+1U)	2309.22	3551.59	0.650194
TTCACAGTGGCTAAGTTCTGCAT	hsa-miR-24-3p|0|-2	12.1356	18.6923	0.649229
TTCACAGTGGCTAAGTTCTGCT	hsa-miR-424-3p|0|-1	3.85714	5.94231	0.649098
TTCACAGTGGCTAAGTTCTGCTT	hsa-miR-425-5p|0|-3	4.22642	6.53333	0.6469
TTCACAGTGGCTAAGTTCTG	hsa-miR-29c-3p|-1|-3	59.8254	92.6129	0.645973
TTCACAGTGGCTAAGTTCTGT	hsa-miR-584-3p|0|-1	62.614	96.9592	0.645777
TTCACAGTGGCTAAGTTCT	hsa-miR-150-5p|0|+1	19.6	30.4355	0.643985
TTCACAGTGGCTAAGTTCTT	hsa-miR-99b-5p|+1|0(+1U)	13.5738	21.1207	0.642676
TTCACAGTGGCTAAGTTCTTT	hsa-miR-18a-3p|0|-1	12.1458	18.9	0.642637
GTTCACAGTGGCTAAGTTCTGCA	hsa-miR-98-5p|0|+1	50.377	78.6452	0.640561
GTTCACAGTGGCTAAGTTCTGC	hsa-let-7d-3p|0|+1	32.04	50.1129	0.639356
GTTCACAGTGGCTAAGTTCTG	hsa-miR-105-5p|+1|+1	23.5143	36.8226	0.638583
GTTCACAGTGGCTAAGTTCTGT	hsa-miR-760|-1|+1(+1U)	7.82927	12.2833	0.63739
GTTCACAGTGGCTAAGTTCT	hsa-miR-140-3p|0|+1	13.1228	20.5968	0.637129
AGAGCTTAGCTGATTGGTGAACA	hsa-miR-451a|0|+4	5.35849	8.41176	0.637023
AGAGCTTAGCTGATTGGTGAACAG	hsa-miR-451a|0|+2	5.35417	8.41176	0.636509
AGAGCTTAGCTGATTGGTGAA	hsa-miR-100-5p|0|-1	29.1905	45.8689	0.63639
CAGAGCTTAGCTGATTGGTGAAC	hsa-miR-30a-3p|0|+1(+1U)	49.3158	77.5397	0.636007
ACTAGATTGTGAGCTCCTGGAG	hsa-miR-7706|0|-2	18.3333	28.9355	0.633593
ACTAGATTGTGAGCTCCTGGAGT	hsa-miR-335-3p|-1|-1	6.37288	10.0612	0.63341
ACTAGATTGTGAGCTCCTGGA	hsa-miR-451a|+2|-1	5.30233	8.41176	0.630346
ACTAGATTGTGAGCTCCTGGAT	hsa-miR-140-3p|+2|0	12.9444	20.5968	0.62847
ACTAGATTGTGAGCTCCTGG	hsa-miR-320a-3p|+4|0(+1U)	32.38	51.541	0.628238
ACTAGATTGTGAGCTCCTG	hsa-miR-1307-3p|0|0(+1U)	5.19231	8.31373	0.624546
CTAGATTGTGAGCTCCTGGAG	hsa-miR-29c-3p|-1|-1	57.8254	92.6129	0.624377
CTAGATTGTGAGCTCCTGGAGT	hsa-miR-103a-3p|+2|-1(+1U)	3.85106	6.18182	0.622966
CTAGATTGTGAGCTCCTGGA	hsa-miR-22-3p|+3|0	9.18333	14.7458	0.622778
CTAGATTGTGAGCTCCTGG	hsa-miR-10b-5p|0|-5	23.2459	37.381	0.621865
TAGATTGTGAGCTCCTGGA	hsa-miR-143-3p|+3|0(+3U)	151.032	243.127	0.621205
CACTAGATTGTGAGCTCCTGGAG	hsa-miR-150-5p|-2|-3	18.8519	30.4355	0.619404
CACTAGATTGTGAGCTCCTGGAGT	hsa-miR-143-3p|+4|+1	149.952	243.127	0.616766
CACTAGATTGTGAGCTCCTGGAT	hsa-let-7a-5p|0|+2	3.77778	6.12903	0.616374
CACTAGATTGTGAGCTCCTGGATT	hsa-miR-874-3p|0|+1	29.8889	48.5873	0.615158
CACTAGATTGTGAGCTCCTGG	hsa-miR-320a-3p|+4|+1(+1U)	31.6364	51.541	0.61381
CACTAGATTGTGAGCTCCTGGT	hsa-miR-432-5p|0|-1(+1U)	3.48837	5.6875	0.61334
CACTAGATTGTGAGCTCCTGGTT	hsa-miR-877-3p|0|0(+1U)	7.32759	11.9483	0.613276
CACTAGATTGTGAGCTCCTG	hsa-miR-1301-3p|0|-3	28.6964	46.8065	0.613087
CACTAGATTGTGAGCTCCTGT	hsa-miR-409-3p|-1|-1	6.65455	10.8929	0.610909
CACTAGATTGTGAGCTCCT	hsa-let-7a-5p|0|-4(+2U)	3.7381	6.12903	0.6099
CCACTAGATTGTGAGCTCCTGGA	hsa-miR-509-3p|0|-4(+1U)	4.4717	7.33333	0.609777
CCACTAGATTGTGAGCTCCTGG	hsa-miR-10b-5p|0|-1	22.7727	37.381	0.609207
AGGAGCTCACAGTCTATTGA	hsa-miR-409-5p|0|+1	3.73469	6.13208	0.609042
GGAGCTCACAGTCTATTGAG	hsa-miR-27b-3p|-1|-1	5.08511	8.38889	0.606172
AAGGAGCTCACAGTCTATTGAGT	hsa-miR-181a-5p|0|-2	3.71875	6.14035	0.605625
AAGGAGCTCACAGTCTATTGA	hsa-miR-432-5p|0|-4	3.44444	5.6875	0.605617
AAGGAGCTCACAGTCTATTG	hsa-miR-183-5p|+1|+2	683.357	1129.52	0.604996
AAGGAGCTCACAGTCTATTGT	hsa-miR-296-3p|+1|-2	8.41071	13.918	0.604303
AAGGAGCTCACAGTCTATT	hsa-miR-214-5p|0|-1	6.29091	10.4333	0.602963
AGGGTTGGGTGGAGGCTCTCC	hsa-miR-186-5p|0|+2(+1U)	3.75676	6.23077	0.602936
AGGGTTGGGTGGAGGCTCTC	hsa-miR-99b-3p|0|+1	6.62963	11.0345	0.60081
AGGGTTGGGTGGAGGCTCT	hsa-miR-425-5p|+1|-2	3.92105	6.53333	0.600161
GAGGGTTGGGTGGAGGCTCTC	hsa-miR-296-3p|+1|0	8.35185	13.918	0.600074
GAGGGTTGGGTGGAGGCTCT	hsa-miR-3928-3p|0|-1	3.74468	6.26667	0.597555
AGGGCCCCCCCTCAATCCTG	hsa-miR-182-5p|+5|0	52.84	88.5161	0.596953
GAGGGCCCCCCCTCAATCCTGT	hsa-miR-143-3p|0|-2	145.127	243.127	0.596918
AGCACCATCTGAAATCGGTT	hsa-miR-10399-5p|-1|-1	11.918	20	0.595902
GCACCATCTGAAATCGGTTA	hsa-miR-127-5p|0|+1	19.0476	31.9841	0.595533
GCACCATCTGAAATCGGTT	hsa-miR-379-5p|0|-1(+1U)	11.9333	20.1111	0.59337
GCACCATCTGAAATCGGT	hsa-miR-3690|0|+1	4.97872	8.4	0.592705
TAGCACCATCTGAAATCGGTTAT	hsa-miR-320a-3p|-1|-1(+1U)	11.7037	19.7593	0.592315
TAGCACCATCTGAAATCGGTTATT	hsa-miR-500a-3p|0|+2	71.0476	120.302	0.590579
TAGCACCATCTGAAATCGGTTATA	hsa-miR-30c-5p|0|-3	10.45	17.7018	0.590337
TAGCACCATCTGAAATCGGTT	hsa-miR-339-5p|0|-1(+1U)	11.7458	19.9344	0.58922
TAGCACCATCTGAAATCGGTTT	hsa-miR-320a-3p|+5|+1	30.3103	51.541	0.588082
TAGCACCATCTGAAATCGGTTTT	hsa-miR-28-3p|0|+1	15.3333	26.1522	0.586312
TAGCACCATCTGAAATCGGT	hsa-miR-1301-3p|0|-4	27.4167	46.8065	0.585745
TAGCACCATCTGAAATCGG	hsa-miR-320a-3p|+1|+1(+1U)	30.129	51.541	0.584565
TAGCACCATCTGAAATCG	hsa-let-7e-5p|0|-1	12.6885	21.7143	0.58434
TAGCACCATCTGAAATCGT	hsa-miR-30d-5p|0|-3	23.0984	39.5429	0.584135
TAGCACCATCTGAAATCGTT	hsa-miR-338-3p|0|0(+1U)	5.275	9.03125	0.584083
TAGCACCATCTGAAATCGTTT	hsa-let-7c-5p|-1|0	15.8636	27.2063	0.583086
CTAGCACCATCTGAAATCGGTTAT	hsa-miR-509-3p|+5|+1	4.26923	7.33333	0.582168
CTAGCACCATCTGAAATCGGTTA	hsa-miR-30a-3p|+1|+1	45.0877	77.5397	0.581479
CTAGCACCATCTGAAATCGGTT	hsa-miR-218-5p|0|+1(+1U)	5.85417	10.082	0.580657
CTAGCACCATCTGAAATCGGTTT	hsa-miR-548v|0|+1	42.5345	73.2698	0.580518
CTAGCACCATCTGAAATCGGT	hsa-let-7f-5p|0|+2	4.67925	8.08333	0.578876
CTAGCACCATCTGAAATCGG	hsa-miR-143-3p|+1|0	140.73	243.127	0.578834
CTAGCACCATCTGAAATCG	hsa-miR-217-5p|-1|-1	10.1746	17.6129	0.577679
CTAGCACCATCTGAAATC	hsa-miR-10a-5p|+1|+1(+1U)	100.698	174.587	0.57678
ACTGATTTCTTTTGGTGTTCAGA	hsa-miR-203a-3p|-1|0	6.13043	10.678	0.57412
CTGGTTTCATATGGTGGTTTAGA	hsa-miR-127-3p|0|0(+3U)	4.66	8.125	0.573538
GCTGGTTTCATATGGTGGTTTAG	hsa-miR-105-5p|0|+1	21.1148	36.8226	0.573419
GCTGGTTTCATATGGTGGTTTA	hsa-miR-1307-3p|0|-1	4.75	8.31373	0.571344
GCTGGTTTCATATGGTGGTTT	hsa-miR-143-3p|-1|-2	138.371	243.127	0.56913
GCTGGTTTCATATGGTGGTT	hsa-let-7c-5p|-1|-3	15.4211	27.2063	0.566818
CTGGTTTCACATGGTGGCTTAGA	hsa-miR-10b-5p|+1|-2	21.1803	37.381	0.566607
CTGGTTTCACATGGTGGCTTAGAT	hsa-miR-450b-5p|0|-1	2.94286	5.19643	0.566323
GCTGGTTTCACATGGTGGCTTAGA	hsa-miR-21-5p|0|+1	111.746	197.921	0.5646
GCACCATTTGAAATCAGTGTT	hsa-miR-760|0|+1(+1U)	6.90909	12.2833	0.562477
TAGCACCATTTGAAATCAGTGT	hsa-miR-509-3p|+2|0(+2U)	4.11111	7.33333	0.560606
TAGCACCATTTGAAATCAGTG	hsa-miR-221-3p|0|-1	14.2833	25.4828	0.56051
TAGCACCATTTGAAATCAGT	hsa-let-7d-3p|+1|0	28.0625	50.1129	0.559986
TAGCACCATTTGAAATCAG	hsa-miR-221-3p|0|-5	14.1667	25.4828	0.555931
TAGCACCATTTGAAATCA	hsa-miR-423-3p|+2|0	5.1	9.20339	0.554144
CTAGCACCATTTGAAATCAGTG	hsa-miR-1269a|0|-4	6.48077	11.7273	0.552624
CTAGCACCATTTGAAATCAGT	hsa-let-7b-5p|0|-3	2.58537	4.68182	0.552214
CTAGCACCATTTGAAATCAG	hsa-miR-26a-5p|0|+2	9.74074	17.6452	0.552035
TAGCACCATTTGAAATCGGTTAT	hsa-let-7a-5p|0|-4(+1U)	3.37209	6.12903	0.550184
TAGCACCATTTGAAATCGGTT	hsa-let-7d-5p|0|+1	3.84783	7	0.549689
TAGCACCATTTGAAATCGGTTT	hsa-miR-1269a|0|-1	6.44231	11.7273	0.549344
TAGCACCATTTGAAATCGGT	hsa-miR-505-3p|+2|+1	5.8125	10.5849	0.549131
TAGCACCATTTGAAATCGG	hsa-miR-760|-1|-2	6.72727	12.2833	0.547675
TAGCACCATTTGAAATCG	hsa-miR-664a-3p|+2|0	9.09524	16.6167	0.547356
CTAGCACCATTTGAAATCGGTT	hsa-miR-574-3p|0|-1	8.72222	15.9655	0.546316
CTAGCACCATTTGAAATCGG	hsa-miR-101-3p|-1|-2(+1U)	22.4032	41.0806	0.545347
GACCGATTTCTCCTGGTGTTCA	hsa-miR-423-3p|0|-3	5	9.20339	0.543278
GACCGATTTCTCCTGGTGTTC	hsa-miR-328-3p|0|0(+1U)	5.54762	10.2115	0.54327
GACCGATTTCTCCTGGTGTT	hsa-miR-10a-5p|0|+2	94.8448	174.587	0.543252
ACCGATTTCTCCTGGTGTTCAG	hsa-miR-505-3p|0|+2	5.75	10.5849	0.543226
ACCGATTTCTCCTGGTGTTCAGA	hsa-miR-27a-3p|0|0(+1U)	36.7377	67.9524	0.540639
TGACCGATTTCTCCTGGTGTT	hsa-miR-451a|0|-2	4.54717	8.41176	0.540573
TGACCGATTTCTCCTGGTGT	hsa-miR-370-3p|0|-1	6.22917	11.5333	0.540101
CAGTGCAATAGTATTGTCAAAG	hsa-miR-23b-3p|-1|-2	17.2373	31.9355	0.539753
GCTCTGACTTTATTGCACTAC	hsa-miR-4454|-1|0	3.69565	6.85106	0.539427
CAGCACCAGGATATTGTTGGAGT	hsa-miR-29a-3p|0|+1(+1U)	9.94444	18.4407	0.539267
TCAGCACCAGGATATTGTTGGAGA	hsa-miR-105-5p|+2|+1(+1U)	19.8525	36.8226	0.539138
TCAGCACCAGGATATTGTTGGAGT	hsa-miR-143-3p|0|+2	130.873	243.127	0.538291
TCAGCACCAGGATATTGTTGGA	hsa-miR-424-3p|0|+1	3.17949	5.94231	0.535059
TCAGCACCAGGATATTGTTGG	hsa-let-7c-5p|0|-3(+1U)	14.5385	27.2063	0.534378
TTCCTGCTGAACTGAGCCAGT	hsa-miR-31-5p|0|+1	8.48	15.9623	0.531253
GTTCCTGCTGAACTGAGCCAGT	hsa-miR-92a-3p|0|+2	2.75556	5.2	0.529915
TGTTCCTGCTGAACTGAGCCAG	hsa-miR-335-3p|-1|0	5.31915	10.0612	0.528678
TTTCAGTCGGATGTTTGCAGCT	hsa-miR-140-3p|+2|+3(+1U)	10.8793	20.5968	0.528205
TTTCAGTCGGATGTTTGCAGCTT	hsa-let-7e-5p|0|-2	11.46	21.7143	0.527763
TTTCAGTCGGATGTTTGCAGCTG	hsa-miR-1306-5p|0|-3	3.55556	6.75	0.526749
TTTCAGTCGGATGTTTGCAGC	hsa-miR-26a-5p|0|-2	9.27907	17.6452	0.52587
TTTCAGTCGGATGTTTGCAG	hsa-miR-10399-5p|+1|+1	10.4839	20	0.524194
TTTCAGTCGGATGTTTGCAGT	hsa-miR-181a-2-3p|-1|-2(+1U)	6.42857	12.2667	0.524068
TTTCAGTCGGATGTTTGCAGTT	hsa-miR-30e-5p|+1|+1	8.32727	15.9111	0.523362
TTTCAGTCGGATGTTTGCAGTTT	hsa-miR-101-3p|0|-3	21.5	41.0806	0.523361
TTTCAGTCGGATGTTTGCA	hsa-miR-222-3p|0|+2	6.40351	12.2727	0.521767
TTTCAGTCGGATGTTTGCAT	hsa-miR-877-5p|+1|+3	475.143	913.984	0.519859
TTTCAGTCGGATGTTTGCATT	hsa-miR-409-3p|+1|0	5.64912	10.8929	0.518608
TTTCAGTCGGATGTTTGCATTT	hsa-miR-223-3p|0|+1	4.83673	9.33333	0.518222
TTTCAGTCGGATGTTTGC	hsa-miR-9-3p|+1|0	5.28571	10.2759	0.514382
TTCAGTCGGATGTTTGCAGCT	hsa-miR-26a-5p|0|+1	9.07547	17.6452	0.514332
TTCAGTCGGATGTTTGCAGC	hsa-miR-328-3p|0|-3	5.25	10.2115	0.514124
TTCAGTCGGATGTTTGCAG	hsa-miR-542-3p|0|-2	1722.9	3373.4	0.510732
TTCAGTCGGATGTTTGCAGT	hsa-miR-509-3p|0|-1(+3U)	3.725	7.33333	0.507955
TTCAGTCGGATGTTTGCA	hsa-let-7a-2-3p|0|-1	18.1639	35.7667	0.507845
TCAGTCGGATGTTTGCAGC	hsa-miR-10b-5p|+1|+2(+1U)	18.9474	37.381	0.506872
CTTTCAGTCGGATGTTTGCAGCT	hsa-miR-320a-3p|0|+1(+2U)	26.0769	51.541	0.505945
CTTTCAGTCGGATGTTTGCAGCTT	hsa-miR-10399-5p|+1|+2	10.0833	20	0.504167
CTTTCAGTCGGATGTTTGCAG	hsa-miR-625-3p|+1|-1	530.778	1053.11	0.504012
CTTTCAGTCGGATGTTTGCAGT	hsa-miR-625-5p|0|+1	10	19.878	0.503067
CTTTCAGTCGGATGTTTGCAGTT	hsa-miR-99b-3p|0|-2(+1U)	5.54902	11.0345	0.50288
CTTTCAGTCGGATGTTTGCAGTTT	hsa-miR-193b-5p|0|-1	288.27	574.079	0.502143
CTTTCAGTCGGATGTTTGCA	hsa-miR-30e-5p|+1|-3	7.98246	15.9111	0.501691
CTTTCAGTCGGATGTTTGCAT	hsa-miR-30e-5p|0|+4	7.97959	15.9111	0.501511
CTTTCAGTCGGATGTTTGCATT	hsa-miR-512-3p|0|-2	5.5	10.9833	0.500759
CTTTCAGTCGGATGTTTGC	hsa-miR-652-3p|0|-1(+1U)	13.4603	26.8824	0.500712
CTTTCAGTCGGATGTTTGCT	hsa-miR-508-3p|0|-3	19.2857	38.5238	0.500618
CTTTCAGTCGGATGTTTG	hsa-miR-100-5p|0|-1(+2U)	22.9194	45.8689	0.499671
CTTTCAGTCGGATGTTTGT	hsa-miR-99b-5p|+1|-2	10.5273	21.1207	0.498434
CTGGGAGGTGGATGTTTACTTCT	hsa-miR-409-3p|0|-1	5.41667	10.8929	0.497268
CTGGGAGGTGGATGTTTACTT	hsa-miR-625-5p|0|-1	9.86885	19.878	0.49647
CTGGGAGGTGGATGTTTACT	hsa-miR-140-3p|+3|+2(+1U)	10.193	20.5968	0.494882
TGTAAACATCCTACACTCAGCTG	hsa-miR-148a-3p|+1|0	12.4815	25.2381	0.494549
TGTAAACATCCTACACTCAGCTT	hsa-miR-105-5p|+3|0	18.1639	36.8226	0.493282
TGTAAACATCCTACACTCAGCTTT	hsa-miR-148a-3p|+4|0	12.4259	25.2381	0.492348
TGTAAACATCCTACACTCAGC	hsa-miR-24-3p|0|-3	9.2	18.6923	0.492181
TGTAAACATCCTACACTCAG	hsa-miR-27b-5p|0|+2	6.26316	12.7627	0.490739
TGTAAACATCCTACACTCA	hsa-let-7i-5p|0|-2	54.9841	112.27	0.48975
TGGGAGAAGGCTGTTTACTCT	hsa-miR-451a|+1|-1	4.11364	8.41176	0.489034
CTGGGAGAAGGCTGTTTACTCTT	hsa-miR-3065-3p|0|-2	27.5357	56.3871	0.488334
CTGGGAGAAGGCTGTTTACTC	hsa-miR-1269a|0|-4(+1U)	5.72414	11.7273	0.488105
CTGGGAGAAGGCTGTTTACT	hsa-miR-127-3p|0|-2(+1U)	3.96296	8.125	0.487749
TGTAAACATCCTACACTCTCAGCT	hsa-miR-143-3p|-1|-1	118.492	243.127	0.487367
TGTAAACATCCTACACTCTCAGCTT	hsa-miR-363-3p|+1|0(+2U)	6.5283	13.4182	0.486527
TGTAAACATCCTACACTCTCAGCTTT	hsa-miR-423-3p|+1|-1	4.43243	9.20339	0.481609
TGTAAACATCCTACACTCTCAG	hsa-miR-181a-2-3p|0|-1(+1U)	5.89796	12.2667	0.480812
TGTAAACATCCTACACTCTCAGT	hsa-miR-1306-5p|0|0(+1U)	3.24	6.75	0.48
TGTAAACATCCTACACTCTCA	hsa-miR-338-3p|-1|-2	4.32653	9.03125	0.479062
TGTAAACATCCTACACTCTC	hsa-miR-675-3p|0|+1	6.34	13.2727	0.477671
TGTAAACATCCTACACTCT	hsa-miR-328-3p|0|-2(+2U)	4.86538	10.2115	0.47646
TGTAAACATCCTACACTC	hsa-miR-760|-1|0	5.82927	12.2833	0.474567
TTTCAGTCAGATGTTTGCTGCT	hsa-miR-1299|0|-3	6.92727	14.6333	0.47339
TTTCAGTCAGATGTTTGCTGT	hsa-let-7i-5p|0|+2	53.0806	112.27	0.472795
TTTCAGTCAGATGTTTGCTGTT	hsa-miR-25-3p|+2|0	23.2258	49.2742	0.471358
CTTTCAGTCAGATGTTTGCTGCT	hsa-miR-589-5p|0|-1	3.85714	8.1875	0.471101
CTTTCAGTCAGATGTTTGCTG	hsa-let-7d-5p|0|-3	3.29545	7	0.470779
CTTTCAGTCAGATGTTTGCTGT	hsa-miR-27a-3p|0|-2(+3U)	31.9206	67.9524	0.46975
CTTTCAGTCAGATGTTTGCTGTT	hsa-miR-196b-5p|0|-1(+1U)	5.66667	12.0741	0.469325
GTAAACATCCCCGACTGGAAG	hsa-miR-223-3p|+1|+2	4.37931	9.33333	0.469212
TAAACATCCCCGACTGGAAG	hsa-miR-25-3p|0|-2(+1U)	23.1	49.2742	0.468805
AAACATCCCCGACTGGAAG	hsa-miR-363-3p|+1|0(+1U)	6.28261	13.4182	0.468216
AACATCCCCGACTGGAAG	hsa-miR-542-3p|-1|0	1574	3373.4	0.466592
TGTAAACATCCCCGACTGGAAGC	hsa-miR-223-3p|0|+2	4.35135	9.33333	0.466216
TGTAAACATCCCCGACTGGAAGCT	hsa-miR-6842-3p|0|-2	6.18	13.2881	0.465077
TGTAAACATCCCCGACTGGAAGCTT	hsa-miR-196b-5p|0|-1	5.61111	12.0741	0.464724
TGTAAACATCCCCGACTGGAAGCTTT	hsa-miR-1269a|0|-1(+1U)	5.44737	11.7273	0.464504
TGTAAACATCCCCGACTGGAAGCTG	hsa-miR-320a-3p|0|+1(+1U)	23.9107	51.541	0.463917
TGTAAACATCCCCGACTGGAAGT	hsa-miR-10b-5p|+4|0	17.3191	37.381	0.463315
TGTAAACATCCCCGACTGGAAGTT	hsa-miR-409-3p|-1|+1	5.03922	10.8929	0.462617
TGTAAACATCCCCGACTGGAA	hsa-miR-379-5p|-1|0	9.29825	20.1111	0.462344
TGTAAACATCCCCGACTGGAAT	hsa-miR-574-3p|0|-3	7.36957	15.9655	0.461593
TGTAAACATCCCCGACTGGA	hsa-miR-101-3p|+2|-1	18.8548	41.0806	0.458971
TGTAAACATCCCCGACTGGAT	hsa-miR-21-5p|0|-2	90.619	197.921	0.457855
TGTAAACATCCCCGACTGG	hsa-miR-4677-3p|0|-3	28.2203	61.7143	0.457274
TGTAAACATCCCCGACTGGT	hsa-let-7a-3p|0|-1	4.93023	10.8367	0.454956
TGTAAACATCCCCGACTG	hsa-miR-513b-5p|0|-2	15.623	34.3492	0.454827
TGTAAACATCCCCGACTGT	hsa-miR-211-5p|0|0(+3U)	1614.84	3551.59	0.454682
TTTCAGTCGGATGTTTACAGC	hsa-miR-217-5p|0|-1	8	17.6129	0.454212
TTTCAGTCGGATGTTTACAGCT	hsa-miR-125b-2-3p|-1|0	119.921	264.238	0.453836
TTTCAGTCGGATGTTTACAG	hsa-miR-143-3p|+3|0	110.27	243.127	0.453548
TTTCAGTCGGATGTTTACAGT	hsa-miR-103a-3p|0|+2	2.8	6.18182	0.452941
TTTCAGTCGGATGTTTACAGTT	hsa-miR-105-5p|+4|0	16.6721	36.8226	0.452769
TTTCAGTCGGATGTTTACA	hsa-miR-181a-2-3p|0|-3(+3U)	5.53333	12.2667	0.451087
TTTCAGTCGGATGTTTAC	hsa-miR-451a|+2|0	3.78947	8.41176	0.450497
TTCAGTCGGATGTTTACAGC	hsa-miR-451a|+2|+1	3.78261	8.41176	0.449681
TTCAGTCGGATGTTTACAG	hsa-miR-143-3p|0|+1(+2U)	109.238	243.127	0.449305
TTCAGTCGGATGTTTACAGT	hsa-miR-204-5p|0|0(+2U)	50.9841	113.524	0.449105
CTTTCAGTCGGATGTTTACAGCG	hsa-miR-150-5p|-2|0	13.6452	30.4355	0.448331
CTTTCAGTCGGATGTTTACAGCT	hsa-miR-15b-3p|0|-3	10.2143	22.7903	0.448185
CTTTCAGTCGGATGTTTACAG	hsa-miR-1307-3p|0|+3(+1U)	3.71053	8.31373	0.446313
CTTTCAGTCGGATGTTTACAGT	hsa-miR-125b-1-3p|0|-1	5.16071	11.5873	0.445377
CTTTCAGTCGGATGTTTACAGTT	hsa-miR-508-3p|0|-2	17.1525	38.5238	0.445245
CTTTCAGTCGGATGTTTACAGTTT	hsa-miR-26a-5p|0|-4(+1U)	7.82222	17.6452	0.443307
CTTTCAGTCGGATGTTTACA	hsa-miR-30e-5p|+1|+3	7.04255	15.9111	0.442619
CTTTCAGTCGGATGTTTACAT	hsa-miR-423-3p|0|-1	4.07018	9.20339	0.442247
CTTTCAGTCGGATGTTTACATT	hsa-miR-140-3p|0|+3	9.06383	20.5968	0.440061
CTTTCAGTCGGATGTTTACATTT	hsa-miR-30e-5p|0|-1(+1U)	6.98246	15.9111	0.438842
CTTTCAGTCGGATGTTTAC	hsa-miR-1269b|0|-1	3.54054	8.07407	0.438507
CTTTCAGTCGGATGTTTACT	hsa-miR-30a-3p|+2|+1	33.7288	77.5397	0.434988
CTTTCAGTCGGATGTTTA	hsa-miR-125b-2-3p|+2|0(+1U)	114.889	264.238	0.434793
CTTTCAGTCGGATGTTTAT	hsa-miR-125a-5p|+1|0	3.72	8.56897	0.434125
GCTTTCAGTCGGATGTTTACAGC	hsa-miR-335-3p|0|-1(+1U)	4.36735	10.0612	0.434077
GCTTTCAGTCGGATGTTTACAG	hsa-miR-105-5p|0|-2(+1U)	15.9667	36.8226	0.433611
GCTTTCAGTCGGATGTTTACAGT	hsa-miR-340-3p|0|-1	4.27907	9.88679	0.432807
GCTTTCAGTCGGATGTTTACA	hsa-miR-30b-3p|0|-2	9.17391	21.25	0.431714
GCTTTCAGTCGGATGTTTAC	hsa-miR-23b-3p|0|-1(+1U)	13.6531	31.9355	0.42752
GTAAACATCCTTGACTGGAAGC	hsa-miR-9-3p|+1|+2	4.3913	10.2759	0.427342
GTAAACATCCTTGACTGGAAGCT	hsa-miR-211-5p|0|0(+4U)	1513.76	3551.59	0.426221
GTAAACATCCTTGACTGGAAGCTT	hsa-miR-30a-3p|+1|-1(+3U)	33	77.5397	0.425589
GTAAACATCCTTGACTGGAAGCTG	hsa-let-7i-5p|0|-3	47.7143	112.27	0.424996
GTAAACATCCTTGACTGGAAGCTGT	hsa-miR-409-3p|0|+1	4.61111	10.8929	0.423315
GTAAACATCCTTGACTGGAAG	hsa-miR-574-3p|0|-2	6.73684	15.9655	0.421962
GTAAACATCCTTGACTGGAA	hsa-miR-296-3p|0|-2	5.84848	13.918	0.420209
GTAAACATCCTTGACTGGA	hsa-miR-22-3p|0|-1	6.19231	14.7458	0.419938
GTAAACATCCTTGACTGG	hsa-miR-744-3p|0|-1	25.6102	61.1639	0.418714
TGTAAACATCCTTGACTGGAAGC	hsa-let-7d-5p|0|-2	2.92593	7	0.417989
TGTAAACATCCTTGACTGGAAGCT	hsa-miR-1269a|0|-3	4.89744	11.7273	0.417611
TGTAAACATCCTTGACTGGAAGCTT	hsa-miR-203a-3p|0|-1	4.45652	10.678	0.417357
TGTAAACATCCTTGACTGGAAGCTG	hsa-miR-99b-5p|-1|0	8.71429	21.1207	0.412595
TGTAAACATCCTTGACTGGAAGCTGT	hsa-miR-148a-3p|0|0(+2U)	10.4098	25.2381	0.412465
TGTAAACATCCTTGACTGGAAGT	hsa-miR-105-5p|+1|0	15.1333	36.8226	0.41098
TGTAAACATCCTTGACTGGAA	hsa-miR-24-3p|+1|-2	7.66667	18.6923	0.410151
TGTAAACATCCTTGACTGGAAT	hsa-miR-505-3p|0|-1	4.34	10.5849	0.410018
TGTAAACATCCTTGACTGGA	hsa-miR-26a-5p|0|0(+2U)	7.22222	17.6452	0.409303
TGTAAACATCCTTGACTGG	hsa-miR-125a-3p|0|-1	75.4127	184.698	0.408302
TGTAAACATCCTTGACTG	hsa-miR-451a|+1|0	3.42222	8.41176	0.406838
TGTAAACATCCTTGACTGT	hsa-miR-320a-3p|+1|0(+3U)	20.9298	51.541	0.406081
ATCAGGGCTTGTGGAATGGGAAGT	hsa-miR-451a|+1|-2	3.39583	8.41176	0.4037
ATCAGGGCTTGTGGAATGGGAA	hsa-miR-221-3p|0|-4	10.2456	25.4828	0.402061
ATCAGGGCTTGTGGAATGGGAAT	hsa-miR-664b-3p|0|-1	45.4921	113.413	0.40112
ATCAGGGCTTGTGGAATGGGA	hsa-miR-125a-3p|0|-2	74	184.698	0.400653
AGGCAAGATGCTGGCATAGCTG	hsa-miR-139-5p|0|-1	5.57143	13.95	0.399386
AGGCAAGATGCTGGCATAGCTGT	hsa-miR-203a-3p|0|-1(+1U)	4.25	10.678	0.398016
TGGGGCGGAGCTTCCGGAGG	hsa-miR-331-3p|0|0(+1U)	16.7541	42.2203	0.396825
TGGGGCGGAGCTTCCGGAGGC	hsa-miR-128-1-5p|0|-1	7.2	18.1452	0.3968
TGGGGCGGAGCTTCCGGAGGCC	hsa-miR-1307-3p|+2|+2	3.29167	8.31373	0.395932
CACCTTGCGCTACTCAGGTCTGC	hsa-miR-506-3p|-1|-1(+1U)	8.98276	22.7581	0.394707
CACCTTGCGCTACTCAGGTCTGT	hsa-miR-29a-3p|-1|-5	7.26667	18.4407	0.394056
CACCTTGCGCTACTCAGGTCT	hsa-miR-203a-3p|+1|+1	4.20408	10.678	0.393716
AAAGCTGGGTTGAGAGGGCGAA	hsa-miR-140-3p|+3|+1	8.09434	20.5968	0.392991
AAAGCTGGGTTGAGAGGGCGAAT	hsa-miR-365a-3p|0|-1	14.3922	36.7213	0.391929
AAAGCTGGGTTGAGAGGGCGAATT	hsa-let-7f-5p|+1|0	3.16667	8.08333	0.391753
AAAGCTGGGTTGAGAGGGCGAAA	hsa-miR-99b-5p|+3|-1	8.26786	21.1207	0.391458
AAAGCTGGGTTGAGAGGGCGAAAT	hsa-miR-423-3p|+2|-1	3.59574	9.20339	0.390698
AAAGCTGGGTTGAGAGGGCGAAAA	hsa-miR-18a-5p|0|-1	5.25926	13.4667	0.390539
AAAGCTGGGTTGAGAGGGCGA	hsa-miR-26a-5p|0|+3	6.86	17.6452	0.388775
AAAGCTGGGTTGAGAGGGCGAT	hsa-miR-130a-3p|0|-1	7.22222	18.678	0.386671
AAAGCTGGGTTGAGAGGGCGATT	hsa-miR-203a-3p|0|-2	4.12727	10.678	0.386522
AAAGCTGGGTTGAGAGGGCGATTT	hsa-miR-15b-3p|0|-1	8.79661	22.7903	0.38598
AAAGCTGGGTTGAGAGGGCG	hsa-miR-582-3p|0|+1	36.1356	93.7917	0.385275
AAAGCTGGGTTGAGAGGGCGT	hsa-miR-221-3p|0|-1(+1U)	9.7541	25.4828	0.382772
AAAGCTGGGTTGAGAGGGCGTT	hsa-miR-10b-5p|+2|-1	14.3043	37.381	0.382664
AAAGCTGGGTTGAGAGGGCGTTT	hsa-miR-30c-5p|0|-4	6.71698	17.7018	0.379453
AAGCTGGGTTGAGAGGGCGAA	hsa-miR-505-3p|0|+1	4	10.5849	0.377897
AAGCTGGGTTGAGAGGGCGAAT	hsa-miR-99b-3p|0|-1(+1U)	4.16981	11.0345	0.377889
AAGCTGGGTTGAGAGGGCGAAA	hsa-miR-140-3p|+4|+3	7.76667	20.5968	0.377082
AAGCTGGGTTGAGAGGGCGAAAT	hsa-miR-320a-3p|+1|-1(+3U)	19.3729	51.541	0.375873
AAGCTGGGTTGAGAGGGCGAAAA	hsa-miR-1269a|-1|0	4.4	11.7273	0.375194
AAGCTGGGTTGAGAGGGCGA	hsa-miR-584-5p|+1|-1	40.6909	108.717	0.374282
AAGCTGGGTTGAGAGGGCGAT	hsa-miR-10a-5p|+4|+1	65.2264	174.587	0.373603
AAGCTGGGTTGAGAGGGCGATT	hsa-miR-196b-5p|0|0(+1U)	4.50909	12.0741	0.373452
AAGCTGGGTTGAGAGGGCG	hsa-miR-3065-3p|0|+1	21.0351	56.3871	0.373048
GCTGGGTTGAGAGGGCGAA	hsa-miR-320b|0|-2	7.36842	19.7593	0.37291
GCTGGGTTGAGAGGGCGAAT	hsa-miR-425-3p|-1|-3(+1U)	4	10.7619	0.371681
GCTGGGTTGAGAGGGCGA	hsa-miR-508-3p|0|-5	14.3103	38.5238	0.371468
GCTGGGTTGAGAGGGCGAT	hsa-miR-30d-3p|+1|-1(+1U)	66.0317	177.778	0.371429
CTGGGTTGAGAGGGCGAA	hsa-miR-506-3p|-1|-3	8.43103	22.7581	0.370464
AAAAGCTGGGTTGAGAGGGCGAA	hsa-miR-30a-3p|+3|0	28.72	77.5397	0.370391
AAAAGCTGGGTTGAGAGGGCGAAT	hsa-miR-214-3p|-1|-1	14.1607	38.2542	0.370174
AAAAGCTGGGTTGAGAGGGCGAATT	hsa-miR-769-5p|-1|-1	24.95	67.6032	0.369066
AAAAGCTGGGTTGAGAGGGCGAAA	hsa-miR-30a-3p|0|-4	28.3333	77.5397	0.365404
AAAAGCTGGGTTGAGAGGGCGAAAT	hsa-miR-23b-3p|+1|0(+2U)	11.6379	31.9355	0.36442
AAAAGCTGGGTTGAGAGGGCGAAAA	hsa-miR-296-3p|0|-1	5.05556	13.918	0.363238
AAAAGCTGGGTTGAGAGGGCGAT	hsa-miR-127-3p|0|-2(+2U)	2.95122	8.125	0.363227
AAAAGCTGGGTTGAGAGGGCGATT	hsa-miR-24-3p|-1|0	6.74468	18.6923	0.360827
AAAAGCTGGGTTGAGAGGGCGATTT	hsa-miR-132-3p|+2|0(+2U)	23.6508	65.7581	0.359664
AAAAGCTGGGTTGAGAGGGCG	hsa-miR-451a|0|-1	3.02381	8.41176	0.359474
AAAAGCTGGGTTGAGAGGGCGT	hsa-miR-1843|0|+2]	112.951	314.492	0.359154
AAAAGCTGGGTTGAGAGGGCGTT	hsa-miR-22-3p|+1|+1	5.2931	14.7458	0.358958
AAAAGCTGGGTTGAGAGGGCGTTT	hsa-miR-30c-5p|0|-1	6.33962	17.7018	0.358135
GAAAAGCTGGGTTGAGAGGGCGA	hsa-miR-182-5p|0|-4(+1U)	31.6591	88.5161	0.357665
GAAAAGCTGGGTTGAGAGGGCGAT	hsa-miR-500a-3p|-1|0	43.0167	120.302	0.357574
GAAAAGCTGGGTTGAGAGGGCG	hsa-miR-181b-2-3p|0|+1	5.69091	15.9245	0.357368
GAAAAGCTGGGTTGAGAGGGCGT	hsa-miR-664a-3p|+1|0	5.9322	16.6167	0.357003
AAAGCTGGGTTGAGAGGGC	hsa-miR-143-3p|0|+1	86.5238	243.127	0.355879
AAAGCTGGGTTGAGAGGG	hsa-let-7d-3p|0|-2(+2U)	17.8333	50.1129	0.355863
AAAAGCTGGGTTGAGAGGGCA	hsa-miR-148a-3p|+3|0	8.97959	25.2381	0.355795
AAAAGCTGGGTTGAGAGGGCAT	hsa-miR-99b-3p|0|+1(+1U)	3.91228	11.0345	0.35455
AAAAGCTGGGTTGAGAGGGC	hsa-miR-516b-5p|0|+1	14.06	39.7705	0.353528
AAAAGCTGGGTTGAGAGGG	hsa-miR-320a-3p|0|0(+1U)	18.2	51.541	0.353117
AAAAGCTGGGTTGAGAGG	hsa-miR-146b-5p|0|+2	88.4918	251.476	0.351889
GAAAAGCTGGGTTGAGAGG	hsa-miR-140-3p|+1|-1	7.2449	20.5968	0.351749
CGCATCCCCTAGGGCATTGGTGT	hsa-miR-328-3p|0|-4	3.57692	10.2115	0.350282
CGCATCCCCTAGGGCATTGGTGTT	hsa-miR-409-3p|-1|0	3.80952	10.8929	0.349727
CGCATCCCCTAGGGCATTGGTGTA	hsa-miR-99b-5p|0|+1	7.36364	21.1207	0.348646
CGCATCCCCTAGGGCATTGGT	hsa-miR-320a-3p|+2|+3	17.907	51.541	0.347432
CGCATCCCCTAGGGCATTGG	hsa-miR-542-3p|-1|-2(+1U)	1165.24	3373.4	0.34542
CTCTGGGCCCTTCCTCCAGT	hsa-miR-5010-3p|0|0(+1U)	12.6852	36.7302	0.345362
CTCTGGGCCCTTCCTCCAGTT	hsa-miR-100-5p|0|-4	15.7292	45.8689	0.342916
CCTCTGGGCCCTTCCTCCAGC	hsa-miR-625-3p|+1|-2	361.095	1053.11	0.342886
CCTCTGGGCCCTTCCTCCAGT	hsa-miR-132-3p|+1|0(+1U)	22.4915	65.7581	0.342034
CCTCTGGGCCCTTCCTCCAGTT	hsa-miR-24-3p|+2|+1	6.36735	18.6923	0.34064
CCTCTGGGCCCTTCCTCCAGTTT	hsa-miR-26a-5p|0|-1	5.97297	17.6452	0.338505
CCTCTGGGCCCTTCCTCCA	hsa-miR-182-5p|0|-1	29.9583	88.5161	0.338451
CCTCTGGGCCCTTCCTCCAT	hsa-miR-105-5p|+2|+1	12.4386	36.8226	0.337798
CCTCTGGGCCCTTCCTCCATT	hsa-miR-148a-3p|0|+1	8.5122	25.2381	0.337276
CCTCTGGGCCCTTCCTCCATTT	hsa-miR-450a-5p|0|-2	8.44262	25.0952	0.336423
CCTCTGGGCCCTTCCTCC	hsa-miR-501-3p|+1|+1	77.7619	231.587	0.335778
TGGCCCTCTCTGCCCTTCCGT	hsa-miR-574-3p|0|0(+1U)	5.34	15.9655	0.334471
CTGGCCCTCTCTGCCCTTCCGTT	hsa-miR-625-3p|0|-1(+3U)	348.524	1053.11	0.330949
CTGGCCCTCTCTGCCCTTCCGTTT	hsa-miR-10399-5p|+2|+3	6.6	20	0.33
CTGGCCCTCTCTGCCCTTCCG	hsa-miR-211-5p|0|-2	1166.38	3551.59	0.328411
CTGGCCCTCTCTGCCCTTCC	hsa-miR-218-5p|0|+1	3.30952	10.082	0.328262
CTGGCCCTCTCTGCCCTTCCTT	hsa-miR-29c-5p|+1|0	6.28571	19.1864	0.327612
CTGGCCCTCTCTGCCCTTC	hsa-miR-508-3p|+2|-3	12.5965	38.5238	0.326979
CTGGCCCTCTCTGCCCTT	hsa-miR-625-3p|0|-2(+1U)	340.889	1053.11	0.323699
TCTCTGGGCCTGTGTCTTAGGCT	hsa-miR-7-1-3p|0|-1	23.2745	72.127	0.322688
TCTCTGGGCCTGTGTCTTAGG	hsa-miR-767-5p|0|+1	8.68182	26.9206	0.322497
TCTCTGGGCCTGTGTCTTAGGT	hsa-miR-28-3p|+1|0(+1U)	8.36538	26.1522	0.319873
TCTCTGGGCCTGTGTCTTAG	hsa-miR-21-5p|0|-1(+1U)	63.0806	197.921	0.318717
GCCCCTGGGCCTATCCTAGAAT	hsa-miR-196b-5p|0|-3	3.84615	12.0741	0.318546
GCCCCTGGGCCTATCCTAGA	hsa-miR-874-3p|0|-1	15.4545	48.5873	0.318078
GCCCCTGGGCCTATCCTAG	hsa-miR-508-3p|+2|0	12.2295	38.5238	0.317453
TTTTTCATTATTGCTCCTGAC	hsa-miR-29a-3p|0|-1(+2U)	5.85106	18.4407	0.317291
TTTTTCATTATTGCTCCTGACT	hsa-miR-140-3p|+2|+3	6.5	20.5968	0.315583
TTTTTCATTATTGCTCCTGA	hsa-miR-23b-3p|0|-2(+1U)	10.0536	31.9355	0.314809
GTTTTTCATTATTGCTCCTGACC	hsa-miR-10b-5p|+2|0	11.7442	37.381	0.314176
GTTTTTCATTATTGCTCCTGAC	hsa-miR-140-3p|0|+2(+1U)	6.46	20.5968	0.313641
TCAAGAGCAATAACGAAAAATG	hsa-miR-24-3p|0|-1	5.84211	18.6923	0.312541
TCCTATATGATGCCTTTCTTC	hsa-let-7e-3p|0|-1(+1U)	18.6271	59.7937	0.311523
TCCTATATGATGCCTTTCTT	hsa-miR-30e-5p|+1|-2	4.9434	15.9111	0.310688
CTCCTATATGATGCCTTTCTT	hsa-miR-148a-3p|+1|-2(+2U)	7.80488	25.2381	0.30925
CCAGCATCAGTGATTTTGTTGA	hsa-miR-421|0|-1	4	12.9434	0.309038
CCAGCATCAGTGATTTTGTTG	hsa-miR-105-5p|+2|0	11.3462	36.8226	0.30813
TCCAGCATCAGTGATTTTGTTGA	hsa-miR-192-5p|+1|+1(+1U)	106.73	348.587	0.306179
TCCAGCATCAGTGATTTTGTTGAA	hsa-miR-197-3p|0|-4	13.2955	43.4426	0.306046
TCCAGCATCAGTGATTTTGTTGT	hsa-miR-23a-3p|0|-2	239.317	792.508	0.301975
TCCAGCATCAGTGATTTTGTT	hsa-miR-150-5p|-2|-1	9.15385	30.4355	0.300762
TCCAGCATCAGTGATTTTGTTT	hsa-miR-132-3p|0|-2	19.7581	65.7581	0.300466
TCCAGCATCAGTGATTTTGT	hsa-miR-940|0|-1	518.206	1727.94	0.299899
TCCAGCATCAGTGATTTTG	hsa-miR-511-5p|-1|0	36.254	120.968	0.299698
CTCCAGCATCAGTGATTTTGTTGA	hsa-miR-887-3p|0|+2	33.1964	110.857	0.299452
CTCCAGCATCAGTGATTTTGTTG	hsa-miR-320a-3p|+1|+1	15.3871	51.541	0.298541
CTCCAGCATCAGTGATTTTGTT	hsa-miR-339-5p|0|-5	5.94828	19.9344	0.298392
CTCCAGCATCAGTGATTTTGT	hsa-miR-99b-5p|0|-3	6.26415	21.1207	0.296588
CTCCAGCATCAGTGATTTTG	hsa-miR-140-3p|0|+2	6.10345	20.5968	0.29633
TCCCTGTCCTCCAGGAGCTCACGT	hsa-miR-130a-3p|0|-2	5.53448	18.678	0.296311
TCCCTGTCCTCCAGGAGCTCAC	hsa-miR-320b|-1|-4	5.82609	19.7593	0.294854
TCCCTGTCCTCCAGGAGCTCACT	hsa-miR-30e-5p|0|-2	4.66667	15.9111	0.293296
TCCCTGTCCTCCAGGAGCTCA	hsa-miR-31-5p|0|+2	4.67647	15.9623	0.29297
TCCCTGTCCTCCAGGAGCTCAT	hsa-miR-29a-3p|-1|-4	5.38596	18.4407	0.29207
TCCCTGTCCTCCAGGAGCTC	hsa-miR-320a-3p|+1|+1(+2U)	15.05	51.541	0.292001
TCCCTGTCCTCCAGGAGCT	hsa-miR-27a-3p|0|-1(+1U)	19.8136	67.9524	0.29158
TCCCTGTCCTCCAGGAGC	hsa-miR-139-5p|0|-2	4.05882	13.95	0.290955
GTGCATTGTAGTTGCATTGC	hsa-miR-335-3p|0|-2	2.92683	10.0612	0.290902
TCCGTCTCAGTTACTTTATAGCC	hsa-miR-30e-5p|+1|-1	4.60526	15.9111	0.289437
TCCGTCTCAGTTACTTTATAG	hsa-miR-99b-5p|+1|0	6.10204	21.1207	0.288913
[truncated: 960 more rows]
