# Supplementary material for: MicroRNA Isoforms Contribution to Melanoma Pathogenesis
Source: Noncoding RNA. 2021 Sep 27;7(4):63. doi: 10.3390/ncrna7040063 (PMC8544706; doi:10.3390/ncrna7040063)
Supplement: Supplementary file 1 [file ncrna-07-00063-s001.zip › Supplementary table 6.xlsx]

## Sheet: Sheet1
TABLE S6: List of mature microRNAs differentially expressed in melanoma metastasis compared to primary melanomas from TCGA SKCM dataset.
Name	Sequence	Type	p (Corr) ([Metastasis-Tumor] Vs [Primary-Tumor])	Regulation ([Metastasis-Tumor] Vs [Primary-Tumor])	FC ([Metastasis-Tumor] Vs [Primary-Tumor])
hsa-let-7a-5p|+1|0	GAGGTAGTAGGTTGTATAGTT	start-site	0.00373133	up	1.60375
hsa-let-7a-5p|0|-3(+1U)	TGAGGTAGTAGGTTGTATAT	mixed: end-site + 3’ non-template addition	0.000532007	up	1.92343
hsa-let-7a-5p|0|-4	TGAGGTAGTAGGTTGTAT	end-site	0.0206254	up	1.6514
hsa-let-7b-5p|+3|-1	GGTAGTAGGTTGTGTGGT	mixed: start-site + end-site	0.0428493	down	-1.88901
hsa-let-7b-5p|0|+1	TGAGGTAGTAGGTTGTGTGGTTT	end-site	0.0103298	down	-1.59074
hsa-let-7b-5p|0|+1(+1U)	TGAGGTAGTAGGTTGTGTGGTTTT	mixed: end-site + 3’ non-template addition	0.00175854	down	-1.99221
hsa-let-7d-3p|+1|-1	TATACGACCTGCTGCCTTTC	mixed: start-site + end-site	0.00428036	up	1.51817
hsa-let-7d-3p|0|-2	CTATACGACCTGCTGCCTTT	end-site	0.021082	up	1.63203
hsa-let-7g-3p|0|0	CTGTACAGGCCACTGCCTTGC	canonical	0.0111908	up	1.50991
hsa-let-7g-5p|0|-2	TGAGGTAGTAGTTTGTACAG	end-site	0.00562771	up	1.63327
hsa-let-7g-5p|0|-3	TGAGGTAGTAGTTTGTACA	end-site	0.00249588	up	1.93307
hsa-let-7i-3p|0|-2	CTGCGCAAGCTACTGCCTTG	end-site	0.000172476	up	2.42887
hsa-let-7i-5p|0|+1(+1U)	TGAGGTAGTAGTTTGTGCTGTTGT	mixed: end-site + 3’ non-template addition	0.00675578	down	-1.58676
hsa-let-7i-5p|0|0(+1U)	TGAGGTAGTAGTTTGTGCTGTTT	3’ non-template addition	0.000691807	down	-1.67408
hsa-let-7i-5p|0|0(+2U)	TGAGGTAGTAGTTTGTGCTGTTTT	3’ non-template addition	0.00441801	down	-1.57048
hsa-miR-100-5p|+1|0(+1U)	ACCCGTAGATCCGAACTTGTGT	mixed: start-site + 3’ non-template addition	0.0348761	up	1.68485
hsa-miR-100-5p|+1|-1	ACCCGTAGATCCGAACTTGT	mixed: start-site + end-site	0.00107668	up	2.23459
hsa-miR-100-5p|0|0	AACCCGTAGATCCGAACTTGTG	canonical	0.0350422	up	1.7158
hsa-miR-100-5p|0|-1	AACCCGTAGATCCGAACTTGT	end-site	0.0113745	up	1.87024
hsa-miR-100-5p|0|-2	AACCCGTAGATCCGAACTTG	end-site	0.00100955	up	2.60847
hsa-miR-100-5p|0|-3	AACCCGTAGATCCGAACTT	end-site	0.0241255	up	1.96634
hsa-miR-101-3p|0|0(+2U)	TACAGTACTGTGATAACTGAATT	3’ non-template addition	0.021082	down	-1.50952
hsa-miR-101-3p|0|-2	TACAGTACTGTGATAACTG	end-site	0.0458646	up	1.82375
hsa-miR-101-3p|-1|-2	GTACAGTACTGTGATAACTG	mixed: start-site + end-site	0.000584683	up	2.29068
hsa-miR-10399-3p|-4|-1	TACTCTCTCGGACAAGCTGTAGGT	mixed: start-site + end-site	0.0254798	down	-1.56974
hsa-miR-103a-3p|0|0(+1U)	AGCAGCATTGTACAGGGCTATGAT	3’ non-template addition	0.0130241	down	-1.50078
hsa-miR-103a-3p|0|-1(+2U)	AGCAGCATTGTACAGGGCTATGTT	mixed: end-site + 3’ non-template addition	0.00117233	down	-1.57451
hsa-miR-105-5p|+1|-1	CAAATGCTCAGACTCCTGTGG	mixed: start-site + end-site	0.0198515	up	1.75344
hsa-miR-106b-3p|0|-2	CCGCACTGTGGGTACTTGCT	end-site	0.000448693	up	1.83176
hsa-miR-106b-3p|0|-3	CCGCACTGTGGGTACTTGC	end-site	0.00666872	up	1.64275
hsa-miR-10a-5p|+1|-2	ACCCTGTAGATCCGAATTTG	mixed: start-site + end-site	0.0018164	up	1.94625
hsa-miR-10a-5p|+1|-3	ACCCTGTAGATCCGAATTT	mixed: start-site + end-site	0.000136954	up	2.24268
hsa-miR-10a-5p|+1|-4	ACCCTGTAGATCCGAATT	mixed: start-site + end-site	0.0413704	up	1.56436
hsa-miR-10a-5p|+2|0	CCCTGTAGATCCGAATTTGTG	start-site	0.00264057	up	1.62824
hsa-miR-10a-5p|+2|-1	CCCTGTAGATCCGAATTTGT	mixed: start-site + end-site	0.000319682	up	1.92713
hsa-miR-10a-5p|0|-2	TACCCTGTAGATCCGAATTTG	end-site	0.0209397	up	1.58266
hsa-miR-10a-5p|0|-3	TACCCTGTAGATCCGAATTT	end-site	0.000198564	up	2.14705
hsa-miR-10a-5p|0|-4	TACCCTGTAGATCCGAATT	end-site	6.6344e-05	up	2.05086
hsa-miR-10a-5p|0|-5	TACCCTGTAGATCCGAAT	end-site	0.0144072	up	1.70728
hsa-miR-10b-5p|+1|-2	ACCCTGTAGAACCGAATTTG	mixed: start-site + end-site	0.00599863	up	1.69025
hsa-miR-10b-5p|+1|-3	ACCCTGTAGAACCGAATTT	mixed: start-site + end-site	0.00561521	up	1.78726
hsa-miR-10b-5p|0|-3	TACCCTGTAGAACCGAATTT	end-site	0.00221923	up	1.77309
hsa-miR-10b-5p|0|-4	TACCCTGTAGAACCGAATT	end-site	0.00604199	up	1.69743
hsa-miR-10b-5p|0|-5	TACCCTGTAGAACCGAAT	end-site	0.00373133	up	1.80901
hsa-miR-125a-5p|0|0	TCCCTGAGACCCTTTAACCTGTGA	canonical	0.00950077	down	-1.63669
hsa-miR-125b-2-3p|+2|+1	ACAAGTCAGGCTCTTGGGACC	mixed: start-site + end-site	0.0081443	up	1.5344
hsa-miR-125b-2-3p|+2|0	ACAAGTCAGGCTCTTGGGAC	start-site	0.0117166	up	1.70546
hsa-miR-125b-5p|+1|0	CCCTGAGACCCTAACTTGTGA	start-site	0.00708064	up	1.79736
hsa-miR-125b-5p|0|-1	TCCCTGAGACCCTAACTTGTG	end-site	1.63748e-05	up	2.43738
hsa-miR-125b-5p|0|-1(+1U)	TCCCTGAGACCCTAACTTGTGT	mixed: end-site + 3’ non-template addition	0.0127954	up	1.60124
hsa-miR-125b-5p|0|-2	TCCCTGAGACCCTAACTTGT	end-site	0.002622	up	1.90737
hsa-miR-125b-5p|0|-3	TCCCTGAGACCCTAACTTG	end-site	0.0428899	up	1.7258
hsa-miR-126-3p|0|-2	TCGTACCGTGAGTAATAATG	end-site	0.000691807	up	1.67284
hsa-miR-126-5p|0|0	CATTATTACTTTTGGTACGCG	canonical	0.0157762	up	1.50121
hsa-miR-1269b|0|-4	CTGGACTGAGCCATGCTA	end-site	0.0317471	up	4.77062
hsa-miR-128-3p|0|-1	TCACAGTGAACCGGTCTCTT	end-site	0.000927861	up	1.81774
hsa-miR-128-3p|0|-2	TCACAGTGAACCGGTCTCT	end-site	0.0018806	up	2.0555
hsa-miR-1306-5p|0|-2	CCACCTCCCCTGCAAACGTC	end-site	0.00666872	up	1.57
hsa-miR-1307-3p|+1|0	CTCGGCGTGGCGTCGGTCGTG	start-site	0.000181869	up	1.85674
hsa-miR-1307-3p|0|-1	ACTCGGCGTGGCGTCGGTCGT	end-site	0.00199134	up	1.57014
hsa-miR-1307-3p|0|-2	ACTCGGCGTGGCGTCGGTCG	end-site	0.0391141	up	1.51929
hsa-miR-130a-3p|0|-2	CAGTGCAATGTTAAAAGGGC	end-site	0.0209397	up	1.63743
hsa-miR-140-3p|+1|+1	ACCACAGGGTAGAACCACGGA	shifted	0.0018164	up	1.63419
hsa-miR-140-3p|+1|0	ACCACAGGGTAGAACCACGG	start-site	0.000592997	up	2.05046
hsa-miR-140-3p|+1|-1	ACCACAGGGTAGAACCACG	mixed: start-site + end-site	0.000204427	up	2.20449
hsa-miR-140-3p|+2|+1	CCACAGGGTAGAACCACGGA	mixed: start-site + end-site	0.0115832	up	1.60461
hsa-miR-140-3p|+2|+2	CCACAGGGTAGAACCACGGAC	shifted	0.0141562	up	1.53914
hsa-miR-140-3p|+3|+2	CACAGGGTAGAACCACGGAC	mixed: start-site + end-site	0.0149174	up	1.69512
hsa-miR-140-3p|+3|+3	CACAGGGTAGAACCACGGACA	shifted	0.00154024	up	1.58247
hsa-miR-140-3p|0|0	TACCACAGGGTAGAACCACGG	canonical	0.00972785	up	1.60728
hsa-miR-140-3p|0|-1	TACCACAGGGTAGAACCACG	end-site	0.000218029	up	2.10147
hsa-miR-141-5p|0|-1	CATCTTCCAGTACAGTGTTGG	end-site	0.0226647	down	-2.2056
hsa-miR-142-3p|+1|-1	GTAGTGTTTCCTACTTTATGG	mixed: start-site + end-site	0.0181861	up	1.89386
hsa-miR-142-3p|+1|-2	GTAGTGTTTCCTACTTTATG	mixed: start-site + end-site	0.00103888	up	2.44767
hsa-miR-142-3p|0|-1	TGTAGTGTTTCCTACTTTATGG	end-site	0.0300019	up	1.78505
hsa-miR-142-5p|0|0	CATAAAGTAGAAAGCACTACT	canonical	0.0343874	up	1.63175
hsa-miR-142-5p|-2|-3	CCCATAAAGTAGAAAGCACT	mixed: start-site + end-site	5.66754e-05	up	2.23817
hsa-miR-143-3p|0|0	TGAGATGAAGCACTGTAGCTC	canonical	0.000691807	up	1.93145
hsa-miR-143-3p|0|-2	TGAGATGAAGCACTGTAGC	end-site	0.038238	up	1.63795
hsa-miR-143-3p|-1|0	CTGAGATGAAGCACTGTAGCTC	start-site	0.00224418	up	1.68559
hsa-miR-145-5p|0|-2	GTCCAGTTTTCCCAGGAATCC	end-site	0.00981898	up	1.51497
hsa-miR-145-5p|0|-4	GTCCAGTTTTCCCAGGAAT	end-site	0.00537296	up	1.7244
hsa-miR-146a-5p|0|+1	TGAGAACTGAATTCCATGGGTTG	end-site	0.0248165	down	-1.67981
hsa-miR-146a-5p|0|+2	TGAGAACTGAATTCCATGGGTTGT	end-site	0.00647029	down	-1.76842
hsa-miR-146b-3p|0|-1	GCCCTGTGGACTCAGTTCTGG	end-site	0.00634174	up	1.621
hsa-miR-146b-3p|-1|-2	TGCCCTGTGGACTCAGTTCTG	mixed: start-site + end-site	0.00981898	down	-4.04412
hsa-miR-146b-5p|0|-2	TGAGAACTGAATTCCATAGGC	end-site	0.000464103	up	1.95149
hsa-miR-148a-3p|+1|0	CAGTGCACTACAGAACTTTGT	start-site	0.0330474	up	1.81355
hsa-miR-148a-3p|+1|-1	CAGTGCACTACAGAACTTTG	mixed: start-site + end-site	0.0256544	up	1.96494
hsa-miR-148a-3p|0|+2	TCAGTGCACTACAGAACTTTGTCT	end-site	0.00154905	down	-2.20648
hsa-miR-148a-3p|0|0(+2U)	TCAGTGCACTACAGAACTTTGTTT	3’ non-template addition	0.00323742	down	-1.92877
hsa-miR-148a-3p|0|-1	TCAGTGCACTACAGAACTTTG	end-site	0.0495443	up	1.64844
hsa-miR-148a-3p|0|-2	TCAGTGCACTACAGAACTTT	end-site	6.6344e-05	up	2.84757
hsa-miR-148a-3p|0|-3	TCAGTGCACTACAGAACTT	end-site	0.0350422	up	1.87389
hsa-miR-148a-5p|0|-2	AAAGTTCTGAGACACTCCGA	end-site	0.0388786	up	1.56227
hsa-miR-148b-3p|0|-1	TCAGTGCATCACAGAACTTTG	end-site	0.00540046	up	1.50013
hsa-miR-150-5p|0|-1	TCTCCCAACCCTTGTACCAGT	end-site	0.0313176	up	2.04116
hsa-miR-150-5p|0|-2	TCTCCCAACCCTTGTACCAG	end-site	0.0094824	up	2.32995
hsa-miR-150-5p|0|-4	TCTCCCAACCCTTGTACC	end-site	0.0391141	up	2.14673
hsa-miR-150-5p|-2|-2	TGTCTCCCAACCCTTGTACCAG	shifted	0.044261	up	1.69947
hsa-miR-151a-3p|0|-2	CTAGACTGAAGCTCCTTGA	end-site	0.0081443	up	1.61247
hsa-miR-151a-3p|0|-3	CTAGACTGAAGCTCCTTG	end-site	0.0300093	up	1.6678
hsa-miR-155-5p|0|-2	TTAATGCTAATCGTGATAGGGG	end-site	0.0266595	up	1.75286
hsa-miR-155-5p|0|-3	TTAATGCTAATCGTGATAGGG	end-site	0.00269669	up	2.17387
hsa-miR-155-5p|0|-3(+1U)	TTAATGCTAATCGTGATAGGGT	mixed: end-site + 3’ non-template addition	0.0152484	up	1.73575
hsa-miR-155-5p|0|-4	TTAATGCTAATCGTGATAGG	end-site	0.00490333	up	2.17603
hsa-miR-15a-5p|0|+2	TAGCAGCACATAATGGTTTGTGGA	end-site	0.0100561	down	-1.54277
hsa-miR-15a-5p|0|-2	TAGCAGCACATAATGGTTTG	end-site	0.000862688	up	1.66328
hsa-miR-15b-5p|0|-3	TAGCAGCACATCATGGTTT	end-site	0.00369596	up	1.66631
hsa-miR-16-5p|0|+3	TAGCAGCACGTAAATATTGGCGTAG	end-site	0.00910055	down	-1.53026
hsa-miR-16-5p|0|-2	TAGCAGCACGTAAATATTGG	end-site	0.00221923	up	1.75452
hsa-miR-17-5p|0|-2	CAAAGTGCTTACAGTGCAGGT	end-site	0.0113478	up	1.60016
hsa-miR-181a-2-3p|0|+1	ACCACTGACCGTTGACTGTACCT	end-site	0.0119264	down	-1.63846
hsa-miR-181a-2-3p|0|-3	ACCACTGACCGTTGACTGT	end-site	0.0064533	up	1.9714
hsa-miR-181a-2-3p|-1|0	AACCACTGACCGTTGACTGTACC	start-site	0.0234435	down	-1.50006
hsa-miR-181a-2-3p|-1|-1	AACCACTGACCGTTGACTGTAC	shifted	0.0214512	down	-1.52984
hsa-miR-181a-5p|0|+2	AACATTCAACGCTGTCGGTGAGTTT	end-site	0.00547978	down	-1.72358
hsa-miR-181a-5p|0|-3	AACATTCAACGCTGTCGGTG	end-site	0.0193996	up	1.68642
hsa-miR-181b-5p|0|+1	AACATTCATTGCTGTCGGTGGGTT	end-site	0.00221923	down	-1.79515
hsa-miR-181b-5p|0|+2(+1U)	AACATTCATTGCTGTCGGTGGGTTTT	mixed: end-site + 3’ non-template addition	0.0326782	down	-1.54499
hsa-miR-181b-5p|0|0	AACATTCATTGCTGTCGGTGGGT	canonical	0.00369596	down	-1.55986
hsa-miR-181b-5p|0|-3	AACATTCATTGCTGTCGGTG	end-site	0.0442565	up	1.60653
hsa-miR-182-5p|0|+1	TTTGGCAATGGTAGAACTCACACTG	end-site	7.85813e-05	down	-3.0851
hsa-miR-182-5p|0|+1(+1U)	TTTGGCAATGGTAGAACTCACACTGT	mixed: end-site + 3’ non-template addition	0.0131101	down	-2.10039
hsa-miR-182-5p|0|+2	TTTGGCAATGGTAGAACTCACACTGG	end-site	1.51976e-05	down	-3.26965
hsa-miR-182-5p|0|+2(+1U)	TTTGGCAATGGTAGAACTCACACTGGT	mixed: end-site + 3’ non-template addition	0.00194462	down	-2.52309
hsa-miR-182-5p|0|0	TTTGGCAATGGTAGAACTCACACT	canonical	0.000100095	down	-2.81531
hsa-miR-182-5p|0|-1	TTTGGCAATGGTAGAACTCACAC	end-site	0.000198564	down	-2.72232
hsa-miR-183-5p|+1|+1	ATGGCACTGGTAGAATTCACTG	shifted	0.00291351	down	-2.25888
hsa-miR-183-5p|+1|+2	ATGGCACTGGTAGAATTCACTGT	mixed: start-site + end-site	0.00181876	down	-2.17487
hsa-miR-183-5p|0|+1	TATGGCACTGGTAGAATTCACTG	end-site	5.66754e-05	down	-3.02624
hsa-miR-183-5p|0|+2	TATGGCACTGGTAGAATTCACTGT	end-site	0.00692687	down	-2.03766
hsa-miR-183-5p|0|0	TATGGCACTGGTAGAATTCACT	canonical	0.00307963	down	-2.05981
hsa-miR-185-5p|0|-1	TGGAGAGAAAGGCAGTTCCTG	end-site	0.000847073	up	1.75676
hsa-miR-186-5p|0|-1	CAAAGAATTCTCCTTTTGGGC	end-site	6.28253e-07	up	2.01858
hsa-miR-186-5p|0|-2	CAAAGAATTCTCCTTTTGGG	end-site	2.31378e-05	up	2.12065
hsa-miR-191-5p|0|-3	CAACGGAATCCCAAAAGCAG	end-site	0.00692687	up	1.55199
hsa-miR-192-5p|0|0	CTGACCTATGAATTGACAGCC	canonical	0.000306546	up	1.79825
hsa-miR-192-5p|0|-1	CTGACCTATGAATTGACAGC	end-site	5.82948e-05	up	2.19635
hsa-miR-192-5p|0|-2	CTGACCTATGAATTGACAG	end-site	0.000985907	up	2.06181
hsa-miR-194-5p|0|-1	TGTAACAGCAACTCCATGTGG	end-site	0.00305757	up	1.63774
hsa-miR-197-3p|0|-1	TTCACCACCTTCTCCACCCAG	end-site	0.000306546	up	1.57623
hsa-miR-197-3p|0|-2	TTCACCACCTTCTCCACCCA	end-site	0.0114775	up	1.51497
hsa-miR-199a-3p|+1|-2	CAGTAGTCTGCACATTGGT	mixed: start-site + end-site	0.0141105	up	1.74977
hsa-miR-199a-3p|+3|-1	GTAGTCTGCACATTGGTT	mixed: start-site + end-site	0.0299038	up	1.72016
hsa-miR-199a-5p|0|-3	CCCAGTGTTCAGACTACCTG	end-site	0.00125835	up	2.0143
hsa-miR-200a-5p|0|0	CATCTTACCGGACAGTGCTGGA	canonical	2.36052e-08	down	-3.20921
hsa-miR-200a-5p|0|-1	CATCTTACCGGACAGTGCTGG	end-site	0.0341805	down	-1.90518
hsa-miR-200b-3p|0|+1	TAATACTGCCTGGTAATGATGAC	end-site	0.0459666	down	-1.7793
hsa-miR-200b-3p|0|0	TAATACTGCCTGGTAATGATGA	canonical	0.000150657	down	-2.33496
hsa-miR-200c-3p|0|0	TAATACTGCCGGGTAATGATGGA	canonical	2.88078e-20	down	-7.80878
hsa-miR-200c-3p|0|-1	TAATACTGCCGGGTAATGATGG	end-site	5.05164e-16	down	-5.64933
hsa-miR-200c-3p|0|-2	TAATACTGCCGGGTAATGATG	end-site	5.66754e-05	down	-2.56864
hsa-miR-203a-3p|+1|+1	TGAAATGTTTAGGACCACTAGA	shifted	4.27286e-10	down	-10.4564
hsa-miR-203a-3p|+1|0	TGAAATGTTTAGGACCACTAG	start-site	4.44542e-19	down	-26.6442
hsa-miR-203a-3p|+1|0(+1U)	TGAAATGTTTAGGACCACTAGT	mixed: start-site + 3’ non-template addition	1.3684e-13	down	-17.7165
hsa-miR-203a-3p|0|+1	GTGAAATGTTTAGGACCACTAGA	end-site	5.38735e-12	down	-11.6819
hsa-miR-203a-3p|0|0	GTGAAATGTTTAGGACCACTAG	canonical	2.67298e-21	down	-33.0078
hsa-miR-203a-3p|0|0(+1U)	GTGAAATGTTTAGGACCACTAGT	3’ non-template addition	1.31777e-06	down	-9.03536
hsa-miR-203a-3p|-1|0	TGTGAAATGTTTAGGACCACTAG	start-site	0.000306546	down	-6.89513
hsa-miR-205-5p|0|+1	TCCTTCATTCCACCGGAGTCTGT	end-site	0.00039022	down	-7.49399
hsa-miR-205-5p|0|0	TCCTTCATTCCACCGGAGTCTG	canonical	0.000134167	down	-8.66836
hsa-miR-20b-5p|0|0	CAAAGTGCTCATAGTGCAGGTAG	canonical	0.0252321	up	2.17845
hsa-miR-210-3p|0|-1	CTGTGCGTGTGACAGCGGCTG	end-site	0.0124513	up	1.77155
hsa-miR-210-3p|0|-2	CTGTGCGTGTGACAGCGGCT	end-site	0.0170518	up	1.74275
hsa-miR-211-5p|0|0	TTCCCTTTGTCATCCTTCGCCT	canonical	0.0114775	down	-3.12203
hsa-miR-212-3p|0|-2	TAACAGTCTCCAGTCACGG	end-site	0.0104711	up	1.70654
hsa-miR-21-5p|+2|0	GCTTATCAGACTGATGTTGA	start-site	0.00129804	up	1.92112
hsa-miR-21-5p|+4|0	TTATCAGACTGATGTTGA	start-site	0.00172205	up	1.82282
hsa-miR-21-5p|0|+2	TAGCTTATCAGACTGATGTTGACT	end-site	0.0407673	down	-1.5824
hsa-miR-21-5p|0|-2	TAGCTTATCAGACTGATGTT	end-site	0.0377771	up	1.63963
hsa-miR-21-5p|0|-3	TAGCTTATCAGACTGATGT	end-site	0.0266595	up	1.67461
hsa-miR-21-5p|0|-4	TAGCTTATCAGACTGATG	end-site	0.00793406	up	1.82313
hsa-miR-218-5p|0|+1	TTGTGCTTGATCTAACCATGTG	end-site	0.000365508	up	1.78068
hsa-miR-218-5p|0|0	TTGTGCTTGATCTAACCATGT	canonical	0.00792741	up	1.60663
hsa-miR-221-3p|0|-2	AGCTACATTGTCTGCTGGGTT	end-site	0.0395262	up	1.51682
hsa-miR-221-3p|0|-3	AGCTACATTGTCTGCTGGGT	end-site	0.00181876	up	2.00242
hsa-miR-221-3p|0|-4	AGCTACATTGTCTGCTGGG	end-site	0.0127954	up	1.82183
hsa-miR-222-3p|0|-1	AGCTACATCTGGCTACTGGG	end-site	0.0148336	up	1.61488
hsa-miR-223-3p|0|+1	TGTCAGTTTGTCAAATACCCCAA	end-site	0.00964647	down	-1.79892
hsa-miR-223-3p|0|+1(+1U)	TGTCAGTTTGTCAAATACCCCAAT	mixed: end-site + 3’ non-template addition	0.000105133	down	-2.32373
hsa-miR-223-3p|0|+2	TGTCAGTTTGTCAAATACCCCAAG	end-site	0.0251627	down	-1.53787
hsa-miR-223-3p|0|0(+1U)	TGTCAGTTTGTCAAATACCCCAT	3’ non-template addition	0.0193893	down	-1.70867
hsa-miR-22-3p|+2|0	GCTGCCAGTTGAAGAACTGT	start-site	0.0162402	up	1.51891
hsa-miR-22-3p|0|+1(+1U)	AAGCTGCCAGTTGAAGAACTGTTT	mixed: end-site + 3’ non-template addition	0.00117233	down	-1.74076
hsa-miR-22-3p|0|-2	AAGCTGCCAGTTGAAGAACT	end-site	0.00547978	up	1.60541
hsa-miR-22-3p|0|-3	AAGCTGCCAGTTGAAGAAC	end-site	0.00513068	up	1.7159
hsa-miR-22-3p|0|-4	AAGCTGCCAGTTGAAGAA	end-site	0.00274704	up	1.97467
hsa-miR-224-5p|+1|0	CAAGTCACTAGTGGTTCCGTTTAG	start-site	7.0381e-07	down	-2.23623
hsa-miR-23a-3p|+1|-1	TCACATTGCCAGGGATTTC	mixed: start-site + end-site	0.000592997	up	1.85861
hsa-miR-23a-3p|0|+1(+2U)	ATCACATTGCCAGGGATTTCCATT	mixed: end-site + 3’ non-template addition	0.002622	down	-1.67499
hsa-miR-23a-3p|0|+2(+1U)	ATCACATTGCCAGGGATTTCCAAT	mixed: end-site + 3’ non-template addition	0.00700035	down	-1.60158
hsa-miR-23a-3p|0|-2	ATCACATTGCCAGGGATTT	end-site	0.00473811	up	1.95936
hsa-miR-23a-3p|0|-3	ATCACATTGCCAGGGATT	end-site	0.00244466	up	2.07124
hsa-miR-23b-3p|+1|0	TCACATTGCCAGGGATTACCAC	start-site	0.0162695	down	-1.5056
hsa-miR-23b-3p|+1|0(+1U)	TCACATTGCCAGGGATTACCACT	mixed: start-site + 3’ non-template addition	0.000113379	down	-1.82462
hsa-miR-23b-3p|0|0	ATCACATTGCCAGGGATTACCAC	canonical	0.000120577	down	-2.08696
hsa-miR-23b-3p|0|0(+1U)	ATCACATTGCCAGGGATTACCACT	3’ non-template addition	6.6344e-05	down	-2.18362
hsa-miR-23b-3p|0|-1(+1U)	ATCACATTGCCAGGGATTACCAT	mixed: end-site + 3’ non-template addition	1.74524e-05	down	-1.88844
hsa-miR-23b-3p|0|-1(+2U)	ATCACATTGCCAGGGATTACCATT	mixed: end-site + 3’ non-template addition	0.000306546	down	-1.68455
hsa-miR-23b-3p|0|-4	ATCACATTGCCAGGGATTA	end-site	0.0252212	up	1.54714
hsa-miR-24-3p|0|0(+2U)	TGGCTCAGTTCAGCAGGAACAGTT	3’ non-template addition	0.00155816	down	-1.58111
hsa-miR-24-3p|0|-3	TGGCTCAGTTCAGCAGGAA	end-site	0.0123849	up	1.65587
hsa-miR-24-3p|0|-3(+1U)	TGGCTCAGTTCAGCAGGAAT	mixed: end-site + 3’ non-template addition	0.00571279	up	1.52871
hsa-miR-24-3p|0|-4	TGGCTCAGTTCAGCAGGA	end-site	0.0232166	up	1.58114
hsa-miR-25-3p|0|0(+2U)	CATTGCACTTGTCTCGGTCTGATT	3’ non-template addition	0.0167184	down	-1.57679
hsa-miR-26a-5p|0|-2	TTCAAGTAATCCAGGATAGG	end-site	0.0167184	up	1.61271
hsa-miR-26a-5p|0|-3	TTCAAGTAATCCAGGATAG	end-site	0.000862688	up	2.16518
hsa-miR-26b-5p|0|-1	TTCAAGTAATTCAGGATAGG	end-site	0.0235617	up	1.50935
hsa-miR-27a-3p|0|-3	TTCACAGTGGCTAAGTTC	end-site	0.0115981	up	1.65497
hsa-miR-27b-3p|0|+1(+1U)	TTCACAGTGGCTAAGTTCTGCAT	mixed: end-site + 3’ non-template addition	0.00379865	down	-1.59751
hsa-miR-27b-3p|0|0(+1U)	TTCACAGTGGCTAAGTTCTGCT	3’ non-template addition	0.00473811	down	-1.51123
hsa-miR-27b-5p|0|0	AGAGCTTAGCTGATTGGTGAAC	canonical	0.000503497	down	-1.60304
hsa-miR-28-3p|0|-2	CACTAGATTGTGAGCTCCTG	end-site	0.00260993	up	1.68615
hsa-miR-28-5p|0|-2	AAGGAGCTCACAGTCTATTG	end-site	0.00590556	up	1.51535
hsa-miR-296-5p|0|0	AGGGCCCCCCCTCAATCCTGT	canonical	0.0127954	up	1.57845
hsa-miR-29a-3p|0|-2	TAGCACCATCTGAAATCGGT	end-site	0.0149084	up	1.83134
hsa-miR-29a-3p|0|-4	TAGCACCATCTGAAATCG	end-site	0.00526578	up	2.0215
hsa-miR-29a-3p|-1|-4	CTAGCACCATCTGAAATCG	mixed: start-site + end-site	0.0342884	up	1.56932
hsa-miR-29b-1-5p|0|0	GCTGGTTTCATATGGTGGTTTAGA	canonical	0.00125835	down	-1.67758
hsa-miR-29c-3p|0|-1	TAGCACCATTTGAAATCGGTT	end-site	0.0143426	up	1.59747
hsa-miR-29c-3p|0|-2	TAGCACCATTTGAAATCGGT	end-site	0.000257621	up	2.48824
hsa-miR-29c-3p|0|-3	TAGCACCATTTGAAATCGG	end-site	0.000691807	up	2.45655
hsa-miR-3065-3p|0|0(+1U)	TCAGCACCAGGATATTGTTGGAGT	3’ non-template addition	0.044261	down	-1.52374
hsa-miR-30a-3p|+2|-1	TTCAGTCGGATGTTTGCAG	mixed: start-site + end-site	0.0454503	up	1.57852
hsa-miR-30d-5p|0|+2	TGTAAACATCCCCGACTGGAAGCT	end-site	0.021082	down	-1.65393
hsa-miR-30d-5p|0|+2(+1U)	TGTAAACATCCCCGACTGGAAGCTT	mixed: end-site + 3’ non-template addition	0.00791563	down	-1.76029
hsa-miR-30e-3p|0|-3	CTTTCAGTCGGATGTTTAC	end-site	0.0239832	up	1.50906
hsa-miR-30e-3p|0|-4	CTTTCAGTCGGATGTTTA	end-site	0.00628737	up	1.68113
hsa-miR-30e-5p|+1|+4	GTAAACATCCTTGACTGGAAGCTGT	mixed: start-site + end-site	0.038774	down	-1.63219
hsa-miR-30e-5p|+1|-2	GTAAACATCCTTGACTGGA	mixed: start-site + end-site	0.0214512	up	1.52379
hsa-miR-30e-5p|0|-2	TGTAAACATCCTTGACTGGA	end-site	0.00628263	up	1.63853
hsa-miR-30e-5p|0|-3	TGTAAACATCCTTGACTGG	end-site	0.0018164	up	2.01544
hsa-miR-3130-5p|0|-2	TACCCAGTCTCCGGTGCAG	end-site	0.000340854	up	1.97571
hsa-miR-320a-3p|0|+1(+2U)	AAAAGCTGGGTTGAGAGGGCGAATT	mixed: end-site + 3’ non-template addition	0.0103298	down	-1.63527
hsa-miR-320a-3p|0|+2(+1U)	AAAAGCTGGGTTGAGAGGGCGAAAT	mixed: end-site + 3’ non-template addition	0.00950077	down	-1.61858
hsa-miR-320a-3p|0|-1(+3U)	AAAAGCTGGGTTGAGAGGGCGTTT	mixed: end-site + 3’ non-template addition	0.0127954	down	-1.5229
hsa-miR-320b|0|-4	AAAAGCTGGGTTGAGAGG	end-site	0.00473556	up	1.98796
hsa-miR-326|0|0	CCTCTGGGCCCTTCCTCCAG	canonical	6.6344e-05	up	2.08207
hsa-miR-326|0|0(+1U)	CCTCTGGGCCCTTCCTCCAGT	3’ non-template addition	2.18824e-06	up	2.20782
hsa-miR-326|0|0(+2U)	CCTCTGGGCCCTTCCTCCAGTT	3’ non-template addition	0.000690915	up	1.68167
hsa-miR-331-3p|0|-1	GCCCCTGGGCCTATCCTAGA	end-site	0.00440634	up	1.51603
hsa-miR-335-3p|0|0	TTTTTCATTATTGCTCCTGACC	canonical	0.0369564	up	1.72561
hsa-miR-338-3p|0|+1	TCCAGCATCAGTGATTTTGTTGA	end-site	0.0355954	down	-1.84752
hsa-miR-342-3p|0|-1	TCTCACACAGAAATCGCACCCG	end-site	0.00224043	up	1.9711
hsa-miR-342-5p|+1|+2	GGGGTGCTATCTGTGATTGAGG	mixed: start-site + end-site	0.0104035	up	1.53532
hsa-miR-34a-5p|0|+1	TGGCAGTGTCTTAGCTGGTTGTT	end-site	0.0258224	down	-1.55806
hsa-miR-34a-5p|0|+1(+1U)	TGGCAGTGTCTTAGCTGGTTGTTT	mixed: end-site + 3’ non-template addition	0.00296993	down	-1.78454
hsa-miR-361-3p|+1|+2	CCCCCAGGTGTGATTCTGATTTGC	mixed: start-site + end-site	0.0032494	down	-1.68043
hsa-miR-361-3p|0|+2	TCCCCCAGGTGTGATTCTGATTTGC	end-site	0.00349216	down	-1.56081
hsa-miR-361-3p|0|-2	TCCCCCAGGTGTGATTCTGAT	end-site	0.00562771	up	1.73983
hsa-miR-361-3p|0|-3	TCCCCCAGGTGTGATTCTGA	end-site	0.000306546	up	2.19951
hsa-miR-362-5p|0|+2	AATCCTTGGAACCTAGGTGTGAGTGC	end-site	0.00780114	down	-1.87538
hsa-miR-363-3p|0|0	AATTGCACGGTATCCATCTGTA	canonical	0.0119264	up	2.18364
hsa-miR-363-3p|0|-1	AATTGCACGGTATCCATCTGT	end-site	0.0294704	up	1.90695
hsa-miR-365a-3p|0|+1	TAATGCCCCTAAAAATCCTTATT	end-site	0.000772061	down	-1.50394
hsa-miR-365a-3p|0|0	TAATGCCCCTAAAAATCCTTAT	canonical	0.000423427	down	-1.66668
hsa-miR-374b-5p|0|-2	ATATAATACAACCTGCTAAG	end-site	0.000548204	up	1.62538
hsa-miR-375-3p|0|0	TTTGTTCGTTCGGCTCGCGTGA	canonical	0.0037472	down	-2.05518
hsa-miR-378a-3p|+1|0	CTGGACTTGGAGTCAGAAGGC	start-site	0.0094824	up	1.62167
hsa-miR-378a-3p|+1|-1	CTGGACTTGGAGTCAGAAGG	mixed: start-site + end-site	0.000501901	up	1.9882
hsa-miR-378a-3p|+1|-1(+1U)	CTGGACTTGGAGTCAGAAGGT	mixed: start-site + end-site + 3’ non-template addition	0.00910055	up	1.56414
hsa-miR-378a-3p|0|-1	ACTGGACTTGGAGTCAGAAGG	end-site	0.00909132	up	1.60436
hsa-miR-378a-5p|0|-1	CTCCTGACTCCAGGTCCTGTG	end-site	0.00776701	up	1.54493
hsa-miR-378a-5p|0|-2	CTCCTGACTCCAGGTCCTGT	end-site	0.0249759	up	1.55829
hsa-miR-378c|+1|-5	CTGGACTTGGAGTCAGAAG	mixed: start-site + end-site	0.00608087	up	1.7858
hsa-miR-378c|0|-4	ACTGGACTTGGAGTCAGAAGA	end-site	0.00331233	up	1.6521
hsa-miR-378c|0|-5	ACTGGACTTGGAGTCAGAAG	end-site	0.00117233	up	1.9108
hsa-miR-382-5p|+1|0	AAGTTGTTCGTGGTGGATTCG	start-site	0.0290293	up	1.5724
hsa-miR-423-5p|0|-2	TGAGGGGCAGAGAGCGAGACT	end-site	0.000558646	up	1.59884
hsa-miR-423-5p|0|-4	TGAGGGGCAGAGAGCGAGA	end-site	0.0140946	up	1.69069
hsa-miR-4286|0|+1	ACCCCACTCCTGGTACCA	end-site	0.0313176	up	1.56519
hsa-miR-452-5p|0|+2	AACTGTTTGCAGAGGAAACTGAGA	end-site	0.00103888	down	-1.74257
hsa-miR-455-3p|0|-2	GCAGTCCATGGGCATATAC	end-site	0.027936	up	1.58856
hsa-miR-493-5p|0|-1	TTGTACATGGTAGGCTTTCAT	end-site	0.0352262	up	1.61495
hsa-miR-500a-3p|0|+1(+1U)	ATGCACCTGGGCAAGGATTCTGAT	mixed: end-site + 3’ non-template addition	0.0285955	down	-1.51481
hsa-miR-500a-3p|-1|+1	AATGCACCTGGGCAAGGATTCTGA	mixed: start-site + end-site	0.0018164	down	-1.66861
hsa-miR-500a-3p|-1|0	AATGCACCTGGGCAAGGATTCTG	start-site	0.00590556	down	-1.56157
hsa-miR-500a-3p|-1|-3	AATGCACCTGGGCAAGGATT	mixed: start-site + end-site	0.0113745	up	1.55123
hsa-miR-500a-3p|-1|-4	AATGCACCTGGGCAAGGAT	mixed: start-site + end-site	0.0114775	down	-2.90074
hsa-miR-501-3p|0|+1(+1U)	AATGCACCCGGGCAAGGATTCTGT	mixed: end-site + 3’ non-template addition	0.0081443	down	-1.72233
hsa-miR-508-3p|+2|0	ATTGTAGCCTTTTGGAGTAGA	start-site	0.00562889	down	-3.19122
hsa-miR-508-3p|0|0	TGATTGTAGCCTTTTGGAGTAGA	canonical	6.64245e-05	down	-5.81977
hsa-miR-508-3p|0|0(+1U)	TGATTGTAGCCTTTTGGAGTAGAT	3’ non-template addition	0.0374832	down	-1.74645
hsa-miR-508-3p|0|-1	TGATTGTAGCCTTTTGGAGTAG	end-site	0.0018164	down	-3.95258
hsa-miR-508-3p|0|-1(+1U)	TGATTGTAGCCTTTTGGAGTAGT	mixed: end-site + 3’ non-template addition	0.0391141	down	-1.99825
hsa-miR-508-5p|0|+1	TACTCCAGAGGGCGTCACTCATGT	end-site	0.020019	down	-1.75518
hsa-miR-508-5p|0|0	TACTCCAGAGGGCGTCACTCATG	canonical	0.0260769	down	-2.09287
hsa-miR-509-3p|0|+1	TGATTGGTACGTCTGTGGGTAGA	start-site	0.000306546	down	-4.10995
hsa-miR-509-3p|0|+1(+1U)	TGATTGGTACGTCTGTGGGTAGAT	mixed: end-site + 3’ non-template addition	0.0114775	down	-1.78886
hsa-miR-509-3p|0|+1(+2U)	TGATTGGTACGTCTGTGGGTAGATT	mixed: end-site + 3’ non-template addition	0.0327714	down	-1.61954
hsa-miR-509-3p|0|0	TGATTGGTACGTCTGTGGGTAG	canonical	0.000691807	down	-4.01978
hsa-miR-509-3p|0|0(+1U)	TGATTGGTACGTCTGTGGGTAGT	3’ non-template addition	0.00884267	down	-2.30028
hsa-miR-509-3p|0|0(+2U)	TGATTGGTACGTCTGTGGGTAGTT	3’ non-template addition	0.0081443	down	-1.73316
hsa-miR-509-3p|0|-1(+1U)	TGATTGGTACGTCTGTGGGTAT	mixed: end-site + 3’ non-template addition	0.0319832	down	-1.70948
hsa-miR-509-5p|0|+1	TACTGCAGACAGTGGCAATCAT	end-site	0.0252321	up	1.59807
hsa-miR-514a-3p|0|0	ATTGACACTTCTGTGAGTAGA	canonical	0.0319832	down	-2.42889
hsa-miR-514a-3p|-2|0	TGATTGACACTTCTGTGAGTAGA	start-site	0.000163809	down	-5.07638
hsa-miR-514a-3p|-3|0	TTGATTGACACTTCTGTGAGTAGA	start-site	0.0499911	down	-1.79929
hsa-miR-519c-5p|0|0	CTCTAGAGGGAAGCGCTTTCTG	canonical	0.0349416	up	6.78944
hsa-miR-574-5p|0|0	TGAGTGTGTGTGTGTGAGTGTGT	canonical	0.00884267	down	-1.68165
hsa-miR-582-3p|+1|0	AACTGGTTGAACAACTGAACC	start-site	0.0276844	up	1.58036
hsa-miR-584-5p|0|+3	TTATGGTTTGCCTGGGACTGAGGAA	end-site	0.0338296	down	-1.86221
hsa-miR-625-3p|+1|0	ACTATAGAACTTTCCCCCTCA	start-site	1.63748e-05	up	1.91377
hsa-miR-625-3p|0|-1	GACTATAGAACTTTCCCCCTC	end-site	0.000172476	up	1.78486
hsa-miR-625-3p|0|-1(+1U)	GACTATAGAACTTTCCCCCTCT	mixed: end-site + 3’ non-template addition	0.00444665	up	1.55815
hsa-miR-625-3p|0|-2	GACTATAGAACTTTCCCCCT	end-site	0.0021221	up	2.007
hsa-miR-625-3p|0|-3	GACTATAGAACTTTCCCCC	end-site	0.0341505	up	1.69809
hsa-miR-629-5p|0|-1	TGGGTTTACGTTGGGAGAAC	end-site	0.000442391	up	1.82079
hsa-miR-654-3p|0|-1	TATGTCTGCTGACCATCACCT	end-site	0.0350422	up	1.56189
hsa-miR-654-3p|0|-2	TATGTCTGCTGACCATCACC	end-site	0.0486442	up	1.58776
hsa-miR-675-3p|0|+2	CTGTATGCCCTCACCGCTCAGC	end-site	0.000305995	up	2.37711
hsa-miR-766-3p|0|-1	ACTCCAGCCCCACAGCCTCAG	end-site	0.0144072	up	1.5628
hsa-miR-767-5p|0|-3	TGCACCATGGTTGTCTGAGC	end-site	0.049664	up	1.88145
hsa-miR-891a-5p|0|+1	TGCAACGAACCTGAGCCACTGAT	end-site	0.0458646	down	-2.67602
hsa-miR-891a-5p|0|0	TGCAACGAACCTGAGCCACTGA	canonical	0.00172205	down	-2.79343
hsa-miR-892a|0|+1	CACTGTGTCCTTTCTGCGTAGA	end-site	0.0492445	down	-2.24117
hsa-miR-92a-3p|+2|0	TTGCACTTGTCCCGGCCTGT	start-site	0.00155816	up	1.69884
hsa-miR-92a-3p|0|-1	TATTGCACTTGTCCCGGCCTG	end-site	0.00378951	up	1.67584
hsa-miR-92a-3p|0|-2	TATTGCACTTGTCCCGGCCT	end-site	0.000170134	up	2.09593
hsa-miR-92a-3p|0|-3	TATTGCACTTGTCCCGGCC	end-site	0.0237621	up	1.60064
hsa-miR-93-5p|+3|0	AGTGCTGTTCGTGCAGGTAG	start-site	0.0485081	up	1.50521
hsa-miR-93-5p|0|-2	CAAAGTGCTGTTCGTGCAGGT	end-site	0.000623353	up	1.65098
hsa-miR-93-5p|0|-3	CAAAGTGCTGTTCGTGCAGG	end-site	0.0112447	up	1.59935
hsa-miR-944|0|0	AAATTATTGTACATCGGATGAG	canonical	0.0373832	down	-2.35211
hsa-miR-98-5p|0|+1	TGAGGTAGTAAGTTGTATTGTTG	end-site	0.00307963	down	-1.58272
hsa-miR-99a-5p|0|-2	AACCCGTAGATCCGATCTTG	end-site	0.0259271	up	1.65037
hsa-miR-99b-3p|0|-3	CAAGCTCGTGTCTGTGGGT	end-site	0.0114775	up	1.67879
hsa-miR-99b-5p|+1|-1	ACCCGTAGAACCGACCTTGC	mixed: start-site + end-site	0.0081443	up	1.64181
hsa-miR-99b-5p|0|-2	CACCCGTAGAACCGACCTTG	end-site	0.0045377	up	1.67812
hsa-miR-99b-5p|0|-3	CACCCGTAGAACCGACCTT	end-site	0.000153479	up	2.01495
hsa-miR-99b-5p|0|-4	CACCCGTAGAACCGACCT	end-site	0.00473811	up	1.80766
