# Supplementary material for: MicroRNA Isoforms Contribution to Melanoma Pathogenesis
Source: Noncoding RNA. 2021 Sep 27;7(4):63. doi: 10.3390/ncrna7040063 (PMC8544706; doi:10.3390/ncrna7040063)
Supplement: Supplementary file 1 [file ncrna-07-00063-s001.zip › Supplementary table 7.xlsx]

## Sheet: finale
Table 7S: List of TCGA melanoma samples with the mutation status of BRAF, NRAS and NF1
Sample-Name	Tumor type	BRAF mutation status	NRAS mutation status	NF1 mutation status
TCGA-BF-A1PU	Primary-Tumor	V600E	-	-
TCGA-BF-A1PV	Primary-Tumor	-	Q61L	R440*
TCGA-BF-A1PX	Primary-Tumor	-	-	-
TCGA-BF-A1PZ	Primary-Tumor	-	Q61R	X2143-splice
TCGA-BF-A1Q0	Primary-Tumor	WT	-	WT
TCGA-BF-A3DJ	Primary-Tumor	V600E	-	-
TCGA-BF-A3DL	Primary-Tumor	V600E | V600M	-	-
TCGA-BF-A3DM	Primary-Tumor	V600E | V600M	-	-
TCGA-BF-A3DN	Primary-Tumor	V600E	-	-
TCGA-BF-A5EP	Primary-Tumor	WT	-	-
TCGA-BF-A5EQ	Primary-Tumor	V600E | V600M	-	-
TCGA-BF-A5ER	Primary-Tumor	V600E | V600M	-	-
TCGA-BF-A5ES	Primary-Tumor	-	-	-
TCGA-D3-A1Q1	Metastasis-Tumor	-	G12R	-
TCGA-D3-A1Q3	Metastasis-Tumor	-	-	-
TCGA-D3-A1Q4	Metastasis-Tumor	V600E	-	-
TCGA-D3-A1Q5	Metastasis-Tumor	V600E	-	-
TCGA-D3-A1Q6	Metastasis-Tumor	V600E	-	-
TCGA-D3-A1Q7	Metastasis-Tumor	V600E	-	-
TCGA-D3-A1Q8	Metastasis-Tumor	-	Q61K	-
TCGA-D3-A1Q9	Metastasis-Tumor	V600E	-	-
TCGA-D3-A1QA	Metastasis-Tumor	V600M | V600G	-	-
TCGA-D3-A1QB	Metastasis-Tumor	-	Q61L	-
TCGA-D3-A2J6	Metastasis-Tumor	-	-	WT
TCGA-D3-A2J7	Metastasis-Tumor	V600E	WT	-
TCGA-D3-A2J8	Metastasis-Tumor	-	Q61L	-
TCGA-D3-A2J9	Metastasis-Tumor	-	-	-
TCGA-D3-A2JA	Metastasis-Tumor	V600E	-	Q1055*
TCGA-D3-A2JB	Metastasis-Tumor	-	-	-
TCGA-D3-A2JC	Metastasis-Tumor	-	WT	-
TCGA-D3-A2JD	Metastasis-Tumor	V600E	-	-
TCGA-D3-A2JF	Metastasis-Tumor	-	-	Y1625*
TCGA-D3-A2JG	Metastasis-Tumor	V600E	-	-
TCGA-D3-A2JH	Metastasis-Tumor	K601E	-	-
TCGA-D3-A2JK	Metastasis-Tumor	V600E	-	-
TCGA-D3-A2JL	Metastasis-Tumor	-	G12R	-
TCGA-D3-A2JN	Metastasis-Tumor	V600E	WT	-
TCGA-D3-A2JO	Metastasis-Tumor	-	Q61K	-
TCGA-D3-A2JP	Metastasis-Tumor	V600E	-	-
TCGA-D3-A3BZ	Metastasis-Tumor	-	-	-
TCGA-D3-A3C1	Metastasis-Tumor	V600E	-	-
TCGA-D3-A3C3	Metastasis-Tumor	V600E	-	-
TCGA-D3-A3C6	Metastasis-Tumor	V600E	-	-
TCGA-D3-A3C7	Metastasis-Tumor	V600E	-	I122681I
TCGA-D3-A3C8	Metastasis-Tumor	-	-	-
TCGA-D3-A3CB	Metastasis-Tumor	V600E	-	-
TCGA-D3-A3CC	Metastasis-Tumor	-	WT	-
TCGA-D3-A3CE	Metastasis-Tumor	V600E	WT	-
TCGA-D3-A3CF	Metastasis-Tumor	-	-	-
TCGA-D3-A3ML	Metastasis-Tumor	-	Q61L
TCGA-D3-A3MO	Metastasis-Tumor	V600E	WT	-
TCGA-D3-A3MR	Metastasis-Tumor	V600E	-	-
TCGA-D3-A3MU	Metastasis-Tumor	V600E	-	-
TCGA-D3-A3MV	Metastasis-Tumor	-	Q61R	-
TCGA-D3-A51E	Metastasis-Tumor	WT	Q61R	-
TCGA-D3-A51F	Metastasis-Tumor	V600E	-	-
TCGA-D3-A51G	Metastasis-Tumor	-	Q61K	-
TCGA-D3-A51H	Metastasis-Tumor	-	-	-
TCGA-D3-A51J	Metastasis-Tumor	V600E	-	-
TCGA-D3-A51K	Metastasis-Tumor	-	-	-
TCGA-D3-A51N	Metastasis-Tumor	V600E	-	-
TCGA-D3-A51R	Metastasis-Tumor	-	Q61R	P1487S
TCGA-D3-A51T	Metastasis-Tumor	G469R	-	WT
TCGA-D3-A5GL	Metastasis-Tumor	-	-	-
TCGA-D3-A5GN	Metastasis-Tumor	V600E	-	-
TCGA-D3-A5GS	Metastasis-Tumor	V600E	-	-
TCGA-D3-A5GU	Metastasis-Tumor	V600E	-	L834L
TCGA-D9-A148	Metastasis-Tumor	V600E	-	-
TCGA-D9-A149	Metastasis-Tumor	-	-	-
TCGA-D9-A1JW	Metastasis-Tumor	N581T	-	WT
TCGA-D9-A1JX	Metastasis-Tumor	V600E	-	-
TCGA-D9-A3Z1	Metastasis-Tumor	-	Q61R	-
TCGA-D9-A3Z3	Metastasis-Tumor	V600E	-	-
TCGA-D9-A3Z4	Primary-Tumor	-	Q61R	-
TCGA-D9-A4Z2	Primary-Tumor	V600E	-	-
TCGA-D9-A4Z3	Primary-Tumor	-	Q61R	S947S
TCGA-D9-A4Z5	Primary-Tumor	N581H	-
TCGA-DA-A1HV	Metastasis-Tumor	-	Q61K	-
TCGA-DA-A1HW	Metastasis-Tumor	V600E	-	-
TCGA-DA-A1HY	Metastasis-Tumor	V600E	-	-
TCGA-DA-A1I0	Metastasis-Tumor	V600E | V600M	-	S2496F
TCGA-DA-A1I1	Metastasis-Tumor	-	Q61L	-
TCGA-DA-A1I2	Metastasis-Tumor	V600E	-	-
TCGA-DA-A1I4	Metastasis-Tumor	V600E	-	-
TCGA-DA-A1I5	Metastasis-Tumor	V600E	-	-
TCGA-DA-A1I7	Metastasis-Tumor	V600E	-	-
TCGA-DA-A1I8	Metastasis-Tumor	V600E	-	-
TCGA-DA-A1IA	Metastasis-Tumor	-	WT	-
TCGA-DA-A1IB	Metastasis-Tumor	G469A	-	-
TCGA-DA-A1IC	Metastasis-Tumor	-	-	W696* | Q282*
TCGA-DA-A3F2	Metastasis-Tumor	-	-	-
TCGA-DA-A3F3	Metastasis-Tumor	-	Q61R | Q61K	-
TCGA-DA-A3F5	Metastasis-Tumor	V600E	-	-
TCGA-DA-A3F8	Metastasis-Tumor	V600E | V600M	-	T1013T
TCGA-EB-A1NK	Primary-Tumor	-	Q61R	-
TCGA-EB-A24C	Primary-Tumor	V600E	-	-
TCGA-EB-A24D	Primary-Tumor	V600E | L245F	-	-
TCGA-EB-A299	Primary-Tumor	V600E	-	-
TCGA-EB-A3HV	Primary-Tumor	V600E	-	-
TCGA-EB-A3XB	Primary-Tumor	V600E | V600M	-	-
TCGA-EB-A3XC	Primary-Tumor	V600M | V600G	-	-
TCGA-EB-A3XD	Primary-Tumor	V600E	-	-
TCGA-EB-A3XE	Primary-Tumor	V600E	WT	-
TCGA-EB-A3XF	Primary-Tumor	V600E | V600M	-	-
TCGA-EB-A3Y6	Primary-Tumor	V600E	-	-
TCGA-EB-A3Y7	Primary-Tumor	-	-	P1232A
TCGA-EB-A41A	Primary-Tumor	-	-	G96G (Splice region) | X2539-splice (Splice donor) | R440*
TCGA-EB-A41B	Primary-Tumor	-	-
TCGA-EB-A42Y	Primary-Tumor	-	-	-
TCGA-EB-A42Z	Primary-Tumor	V600E	WT	-
TCGA-EB-A430	Primary-Tumor	V600E	-	-
TCGA-EB-A431	Primary-Tumor	V600E	-	WT
TCGA-EB-A44N	Primary-Tumor	V600E	-	-
TCGA-EB-A44O	Primary-Tumor	-	Q61K	-
TCGA-EB-A44P	Primary-Tumor	V600E	-	-
TCGA-EB-A44Q	Metastasis-Tumor	-	Q61L	WT
TCGA-EB-A44R	Metastasis-Tumor	-	G13D	-
TCGA-EB-A4IQ	Primary-Tumor	WT	-	-
TCGA-EB-A4IS	Primary-Tumor	V600E	-	P698L
TCGA-EB-A4OY	Primary-Tumor	-	-	-
TCGA-EB-A4OZ	Metastasis-Tumor	-	-	-
TCGA-EB-A4P0	Primary-Tumor	V600E	-	-
TCGA-EB-A4XL	Primary-Tumor	-	Q61K | L52W | G60G	-
TCGA-EB-A51B	Primary-Tumor	-	-	-
TCGA-EB-A550	Primary-Tumor	V600E	-	-
TCGA-EB-A551	Primary-Tumor	-	Q61K	-
TCGA-EB-A5FP	Primary-Tumor	V600E | V600M	-	-
TCGA-EB-A5KH	Metastasis-Tumor	WT	-	-
TCGA-EE-A17X	Metastasis-Tumor	-	Q61K	Y49Y | Y49F
TCGA-EE-A17Y	Metastasis-Tumor	V600E	-	-
TCGA-EE-A17Z	Metastasis-Tumor	WT	-	-
TCGA-EE-A180	Metastasis-Tumor	-	-	W1258*
TCGA-EE-A181	Metastasis-Tumor	S467L	-	intron NF1 | L2604F | R440* | Q519*
TCGA-EE-A182	Metastasis-Tumor	WT	-	S1053* | R440*
TCGA-EE-A183	Metastasis-Tumor	V600E | V600M	-	-
TCGA-EE-A184	Metastasis-Tumor	-	Q61H	-
TCGA-EE-A185	Metastasis-Tumor	-	Q61K	-
TCGA-EE-A20B	Metastasis-Tumor	V600E	-	-
TCGA-EE-A20C	Metastasis-Tumor	-	Q61R	S833F
TCGA-EE-A20F	Metastasis-Tumor	V600E	-	-
TCGA-EE-A20H	Metastasis-Tumor	V600E | V600M	-	-
TCGA-EE-A20I	Metastasis-Tumor	-	-	-
TCGA-EE-A29A	Metastasis-Tumor	V600E	-	-
TCGA-EE-A29B	Metastasis-Tumor	-	-	-
TCGA-EE-A29C	Metastasis-Tumor	V600E	WT	-
TCGA-EE-A29D	Metastasis-Tumor	-	WT	-
TCGA-EE-A29E	Metastasis-Tumor	V600E | V600M	-	-
TCGA-EE-A29G	Metastasis-Tumor	-	Q61K	-
TCGA-EE-A29H	Metastasis-Tumor	V600E	-	-
TCGA-EE-A29L	Metastasis-Tumor	-	Q61L	L1301L | Q1822*
TCGA-EE-A29M	Metastasis-Tumor	V600E	WT	-
TCGA-EE-A29N	Metastasis-Tumor	D594N	-	Y80*
TCGA-EE-A29P	Metastasis-Tumor	V600E	-	-
TCGA-EE-A29Q	Metastasis-Tumor	-	Q61L	-
TCGA-EE-A29R	Metastasis-Tumor	-	Q61R	-
TCGA-EE-A29S	Metastasis-Tumor	-	Q61L	-
TCGA-EE-A29T	Metastasis-Tumor	V600E	WT	-
TCGA-EE-A29V	Metastasis-Tumor	-	G12A	WT
TCGA-EE-A29W	Metastasis-Tumor	V600E	-	-
TCGA-EE-A29X	Metastasis-Tumor	-	Q61R	-
TCGA-EE-A2A0	Metastasis-Tumor	P367S | L597Q	-	-
TCGA-EE-A2A1	Metastasis-Tumor	-	Q61R	-
TCGA-EE-A2A2	Metastasis-Tumor	-	Q61L | Q61*	P2675S
TCGA-EE-A2A5	Metastasis-Tumor	-	Q61R	-
TCGA-EE-A2A6	Metastasis-Tumor	V600E	-	-
TCGA-EE-A2GB	Metastasis-Tumor	V600E | V600M	WT	-
TCGA-EE-A2GC	Metastasis-Tumor	G466E	-	Q2239*
TCGA-EE-A2GD	Metastasis-Tumor	-	Q61K	-
TCGA-EE-A2GE	Metastasis-Tumor	V600E | T599T	-	-
TCGA-EE-A2GH	Metastasis-Tumor	V600E | P318L | P318S	WT	-
TCGA-EE-A2GI	Metastasis-Tumor	-	-	Q2239*
TCGA-EE-A2GJ	Metastasis-Tumor	G466E	G12D	-
TCGA-EE-A2GK	Metastasis-Tumor	-	-	-
TCGA-EE-A2GL	Metastasis-Tumor	-	Q61K	-
TCGA-EE-A2GM	Metastasis-Tumor	P348T	Q61R	Q19871
TCGA-EE-A2GN	Metastasis-Tumor	-	Q61K
TCGA-EE-A2GO	Metastasis-Tumor	G469R	-	P931L
TCGA-EE-A2GP	Metastasis-Tumor	-	Q61R	-
TCGA-EE-A2GR	Metastasis-Tumor	-	-	C383Yfs*10 | X2580-splice
TCGA-EE-A2GS	Metastasis-Tumor	V600E	-	-
TCGA-EE-A2GT	Metastasis-Tumor	V600E | V600M	-	-
TCGA-EE-A2GU	Metastasis-Tumor	-	Q61K	-
TCGA-EE-A2M5	Metastasis-Tumor	V600E	-	-
TCGA-EE-A2M6	Metastasis-Tumor	V600E	-	-
TCGA-EE-A2M7	Metastasis-Tumor	V600E	-	-
TCGA-EE-A2M8	Metastasis-Tumor	V600E	-	-
TCGA-EE-A2MC	Metastasis-Tumor	-	Q61R	-
TCGA-EE-A2MD	Metastasis-Tumor	-	Q61R	-
TCGA-EE-A2ME	Metastasis-Tumor	V600E | V600M	-	-
TCGA-EE-A2MF	Metastasis-Tumor	-	Q61K
TCGA-EE-A2MG	Metastasis-Tumor	V600E	-	-
TCGA-EE-A2MH	Metastasis-Tumor	V600E	-	-
TCGA-EE-A2MI	Metastasis-Tumor	-	WT	L1114M
TCGA-EE-A2MJ	Metastasis-Tumor	-	-	R1241* | S2599F
TCGA-EE-A2MK	Metastasis-Tumor	V600E	-	-
TCGA-EE-A2ML	Metastasis-Tumor	-	Q61R	I2838I
TCGA-EE-A2MM	Metastasis-Tumor	-	Q61H	-
TCGA-EE-A2MN	Metastasis-Tumor	WT	Q61K	-
TCGA-EE-A2MP	Metastasis-Tumor	V600E	-	-
TCGA-EE-A2MQ	Metastasis-Tumor	K601E | P731S	-	-
TCGA-EE-A2MR	Metastasis-Tumor	-	-	-
TCGA-EE-A2MS	Metastasis-Tumor	-	-	X548-splice | L929P
TCGA-EE-A2MT	Metastasis-Tumor	-	-	R1870Q | L844F | X1870-splice
TCGA-EE-A2MU	Metastasis-Tumor	-	Q61H | E62K	-
TCGA-EE-A3AA	Metastasis-Tumor	K601E | E695K	-	-
TCGA-EE-A3AB	Metastasis-Tumor	V600E	-	-
TCGA-EE-A3AC	Metastasis-Tumor	-	Q61K	-
TCGA-EE-A3AD	Metastasis-Tumor	V600E | V600V	-	-
TCGA-EE-A3AE	Metastasis-Tumor	-	WT	Y1169Sfs*22
TCGA-EE-A3AF	Metastasis-Tumor	V600E	-	-
TCGA-EE-A3AG	Metastasis-Tumor	V600E	-	WT
TCGA-EE-A3AH	Metastasis-Tumor	V600E	-	-
TCGA-EE-A3J3	Metastasis-Tumor	V600E	-	-
TCGA-EE-A3J4	Metastasis-Tumor	V600E	-	-
TCGA-EE-A3J5	Metastasis-Tumor	-	-	R1870Q | X1870-splice
TCGA-EE-A3J7	Metastasis-Tumor	-	Q61R	-
TCGA-EE-A3J8	Metastasis-Tumor	-	Q61R	-
TCGA-EE-A3JA	Metastasis-Tumor	-	Q61R	-
TCGA-EE-A3JB	Metastasis-Tumor	V600E	-	-
TCGA-EE-A3JD	Metastasis-Tumor	S467L	-	R1276Q | P1851S
TCGA-EE-A3JE	Metastasis-Tumor	V600E	-	-
TCGA-EE-A3JH	Metastasis-Tumor	K601E	-	-
TCGA-EE-A3JI	Metastasis-Tumor	-	Q61K	-
TCGA-ER-A193	Metastasis-Tumor	V600M | V600G	WT	-
TCGA-ER-A194	Primary-Tumor	-	-	L2661L | L844F | H647Y
TCGA-ER-A195	Metastasis-Tumor	-	Q61K	-
TCGA-ER-A196	Primary-Tumor	-	-	-
TCGA-ER-A197	Metastasis-Tumor	-	-	-
TCGA-ER-A198	Metastasis-Tumor	V600E	-	-
TCGA-ER-A199	Metastasis-Tumor	-	Q61R	-
TCGA-ER-A19A	Metastasis-Tumor	S339S	-	S2754F
TCGA-ER-A19B	Metastasis-Tumor	V600E	-	-
TCGA-ER-A19C	Metastasis-Tumor	V600E	-	-
TCGA-ER-A19D	Metastasis-Tumor	-	Q61K	-
TCGA-ER-A19E	Metastasis-Tumor	V600E	-	WT
TCGA-ER-A19F	Metastasis-Tumor	G466E	-	L274F | X69-splice
TCGA-ER-A19G	Metastasis-Tumor	V600E	-	-
TCGA-ER-A19H	Metastasis-Tumor	V600E	WT	-
TCGA-ER-A19J	Metastasis-Tumor	V600E | V600M	-	-
TCGA-ER-A19K	Primary-Tumor	V600E | V600M	-	-
TCGA-ER-A19L	Metastasis-Tumor	-	-	WT
TCGA-ER-A19M	Metastasis-Tumor	V600E	-	-
TCGA-ER-A19N	Metastasis-Tumor	-	Q61H	-
TCGA-ER-A19O	Metastasis-Tumor	V600E	-	-
TCGA-ER-A19P	Metastasis-Tumor	V600E	-	-
TCGA-ER-A19Q	Metastasis-Tumor	V600E	-	-
TCGA-ER-A19S	Metastasis-Tumor	V600E	WT	-
TCGA-ER-A19T	Primary-Tumor	WT	WT	WT
TCGA-ER-A19W	Metastasis-Tumor	-	Q61K	-
TCGA-ER-A1A1	Metastasis-Tumor	-	-	-
TCGA-ER-A2NB	Primary-Tumor	-	Q61R	-
TCGA-ER-A2NC	Metastasis-Tumor	V600E | V600M	G13R	-
TCGA-ER-A2ND	Metastasis-Tumor	V600E	-	-
TCGA-ER-A2NE	Metastasis-Tumor	-	Q61K	WT
TCGA-ER-A2NF	Primary-Tumor	WT	-	-
TCGA-ER-A2NF	Metastasis-Tumor	-	-	-
TCGA-ER-A2NG	Metastasis-Tumor	V600E	-	-
TCGA-ER-A2NH	Metastasis-Tumor	-	Q61R	-
TCGA-ER-A3ES	Metastasis-Tumor	-	-	-
TCGA-ER-A3ET	Metastasis-Tumor	WT	-	-
TCGA-ER-A3EV	Metastasis-Tumor	-	-	-
TCGA-ER-A3PL	Metastasis-Tumor	V600E | V600V	-	-
TCGA-ER-A42H	Primary-Tumor	WT	-	-
TCGA-ER-A42K	Metastasis-Tumor	V600E	-	-
TCGA-ER-A42L	Metastasis-Tumor	V600E | V600M	-	-
TCGA-FR-A2OS	Primary-Tumor	WT	-	-
TCGA-FR-A3R1	Primary-Tumor	-	-	Q1070* | Q282*
TCGA-FR-A3YN	Metastasis-Tumor	-	Q61R	-
TCGA-FR-A3YO	Metastasis-Tumor	V600-K601delinsE	-	-
TCGA-FS-A1YW	Metastasis-Tumor	-	Q61K	-
TCGA-FS-A1YX	Metastasis-Tumor	V600E	WT	-
TCGA-FS-A1YY	Metastasis-Tumor	V600E	-	-
TCGA-FS-A1Z0	Metastasis-Tumor	WT	Q61R	-
TCGA-FS-A1Z3	Metastasis-Tumor	-	Q61H	L1274H
TCGA-FS-A1Z4	Metastasis-Tumor	-	-	-
TCGA-FS-A1Z7	Metastasis-Tumor	V600E	-	-
TCGA-FS-A1ZA	Metastasis-Tumor	-	Q22K	W784* | W784*
TCGA-FS-A1ZB	Metastasis-Tumor	-	Q61R	-
TCGA-FS-A1ZC	Metastasis-Tumor	V600E | V600M	-	-
TCGA-FS-A1ZD	Metastasis-Tumor	V600E	-	WT
TCGA-FS-A1ZE	Metastasis-Tumor	-	Q61K	-
TCGA-FS-A1ZF	Metastasis-Tumor	V600E	-	WT
TCGA-FS-A1ZG	Metastasis-Tumor	-	-	-
TCGA-FS-A1ZH	Metastasis-Tumor	V600E	-	-
TCGA-FS-A1ZJ	Metastasis-Tumor	-	WT	-
TCGA-FS-A1ZK	Metastasis-Tumor	WT	WT	-
TCGA-FS-A1ZM	Metastasis-Tumor	V600E	-	-
TCGA-FS-A1ZN	Primary-Tumor	V600E	-	-
TCGA-FS-A1ZP	Metastasis-Tumor	-	Q61L	R1362*
TCGA-FS-A1ZQ	Metastasis-Tumor	-	Q61R	WT
TCGA-FS-A1ZR	Metastasis-Tumor	V600E	-	-
TCGA-FS-A1ZS	Metastasis-Tumor	V600E	-	-
TCGA-FS-A1ZT	Metastasis-Tumor	-	Q61R	-
TCGA-FS-A1ZU	Metastasis-Tumor	WT	-	-
TCGA-FS-A1ZW	Metastasis-Tumor	-	Q61K	-
TCGA-FS-A1ZY	Metastasis-Tumor	WT	Q61R	-
TCGA-FS-A1ZZ	Metastasis-Tumor	N581S	P34L	S1599F | Q685*
TCGA-FS-A4F0	Metastasis-Tumor	-	-	-
TCGA-FS-A4F4	Metastasis-Tumor	WT	-	V341Cfs*12
TCGA-FS-A4F5	Metastasis-Tumor	-	Q61R	-
TCGA-FS-A4F8	Metastasis-Tumor	V600E	-	-
TCGA-FS-A4FB	Metastasis-Tumor	V600E	-	-
TCGA-FS-A4FD	Metastasis-Tumor	-	Q61R	-
TCGA-FW-A3I3	Metastasis-Tumor	-	WT	P689Lfs*50
TCGA-FW-A3R5	Metastasis-Tumor	G469E | H725Y | S363S	-	A1240V | E1238* | Q347*
TCGA-FW-A3TU	Metastasis-Tumor	-	-	Q950Q splice region
TCGA-FW-A3TV	Metastasis-Tumor	V600E	-	-
TCGA-FW-A5DX	Primary-Tumor	V600E	-	-
TCGA-GF-A2C7	Primary-Tumor	V600E	-	-
TCGA-GF-A3OT	Metastasis-Tumor	-	Q61K	-
TCGA-GF-A4EO	Metastasis-Tumor	V600E | K183E	-	S2496F
TCGA-GN-A262	Metastasis-Tumor	V600E	-	-
TCGA-GN-A263	Primary-Tumor	V600E	-	F1479
TCGA-GN-A264	Metastasis-Tumor	-	-	-
TCGA-GN-A265	Metastasis-Tumor	V600E	-	-
TCGA-GN-A266	Metastasis-Tumor	-	-	R2517*
TCGA-GN-A267	Metastasis-Tumor	-	Q61K	-
TCGA-GN-A268	Metastasis-Tumor	-	Q61K	-
TCGA-GN-A26A	Metastasis-Tumor	V600E	WT	-
TCGA-GN-A26C	Primary-Tumor	WT	-	L604*
TCGA-GN-A26D	Metastasis-Tumor	-	-	-
TCGA-HR-A5NC	Primary-Tumor	V600E	-	-
TCGA-IH-A3EA	Primary-Tumor	V600E | V600M	-	-
